# Supplementary material for: Integrated Chromatin Accessibility and Transcriptome Landscapes of Doxorubicin-Resistant Breast Cancer Cells
Source: Front Cell Dev Biol. 2021 Jul 30;9:708066. doi: 10.3389/fcell.2021.708066 (PMC8363264; doi:10.3389/fcell.2021.708066)
Supplement: Supplementary file 5 [file Table_4.XLSX]

## Sheet: hyper
Fold change	Chr	Start	End	RPKM	Annotation	Distance to TSS	Entrez ID	Nearest Gene	Gene Description
3993.73	chr13	65686086	65687085	10.3283	Intergenic	-753594	105370242	LINC01052	long intergenic non-protein coding RNA 1052
2860.89	chr18	7117262	7118331	15.1478	Promoter-TSS (NM_005559)	0	284217	LAMA1	laminin subunit alpha 1
1592.26	chr4	124753153	124754495	29.3183	Intron (NR_027105, Intron 4 of 5)	58405	285419	LINC01091	long intergenic non-protein coding RNA 1091
1279.22	chr7	87104571	87105581	634.841	Promoter-TSS (NM_018850)	-57	5244	ABCB4	ATP binding cassette subfamily B member 4
1268.97	chr21	19754988	19756010	8.30901	Intron (NM_002772, Intron 4 of 24)	20603	5651	TMPRSS15	transmembrane serine protease 15
1069.1	chr7	87229731	87230731	1102.62	Promoter-TSS (NM_001348946)	-31	5243	ABCB1	ATP binding cassette subfamily B member 1
1045.37	chr7	51276048	51277047	7.00351	Intron (NM_001346441, Intron 2 of 12)	107959	23242	COBL	cordon-bleu WH2 repeat protein
1032.85	chr6	139728465	139729717	15.3596	Intergenic	-33306	10370	CITED2	Cbp/p300 interacting transactivator with Glu/Asp rich carboxy-terminal domain 2
949.568	chr5	150283983	150285006	18.2406	Promoter-TSS (NM_052860)	51	91975	ZNF300	zinc finger protein 300
869.756	chr8	55747426	55748433	15.5665	Intergenic	219273	6101	RP1	RP1 axonemal microtubule associated
786.652	chr7	85224598	85225901	355.46	Intergenic	174811	105375380	LINC00972	long intergenic non-protein coding RNA 972
698.889	chr7	85216859	85217858	496.926	Intergenic	166920	105375380	LINC00972	long intergenic non-protein coding RNA 972
669.443	chr7	84764904	84767153	471.891	Intergenic	-14781	223117	SEMA3D	semaphorin 3D
644.546	chr8	36677050	36678058	12.5716	Intron (NR_134267, Intron 10 of 27)	35662	157855	KCNU1	potassium calcium-activated channel subfamily U member 1
615.884	chr7	84732375	84733978	423.307	Intron (NM_152754, Intron 1 of 16)	18071	223117	SEMA3D	semaphorin 3D
606.306	chr7	84801634	84802637	285.615	Intergenic	-50888	223117	SEMA3D	semaphorin 3D
570.529	chr8	129912648	129913647	9.7527	Intergenic	65100	106144608	LINC00976	long intergenic non-protein coding RNA 976
558.193	chr6	62995671	62996672	23.0864	Promoter-TSS (NR_146873)	-39	202559	KHDRBS2	KH RNA binding domain containing, signal transduction associated 2
545.518	chr17	33775349	33776367	27.6132	Promoter-TSS (NM_144682)	-73	146857	SLFN13	schlafen family member 13
527.54	chr9	79269236	79270239	21.7774	Intron (NR_131751, Intron 9 of 15)	37594	158471	PRUNE2	prune homolog 2 with BCH domain
518.316	chr14	65928830	65929854	29.0806	Intron (NM_004480, Intron 2 of 9)	-8478	693210	MIR625	microRNA 625
504.748	chr1	72750163	72751415	20.8716	Intergenic	-2567	257194	NEGR1	neuronal growth regulator 1
495.076	chr11	10270845	10271846	11.7764	Intron (NM_030962, Intron 1 of 39)	44409	81846	SBF2	SET binding factor 2
480.814	chr8	63146867	63147873	17.9829	Intergenic	-14043	286183	NKAIN3	sodium/potassium transporting ATPase interacting 3
474.281	chr7	85103330	85104334	184.16	Intron (NR_134240, Intron 2 of 3)	53394	105375380	LINC00972	long intergenic non-protein coding RNA 972
453.176	chr5	158129147	158130146	43.6766	Intron (NM_001324107, Intron 15 of 15)	-292865	101927697	LINC02227	long intergenic non-protein coding RNA 2227
452.811	chr19	52900571	52901570	7.00943	Promoter-TSS (NM_032423)	-32	84436	ZNF528	zinc finger protein 528
451.528	chr16	61825650	61826649	16.0761	Intron (NM_001796, Intron 7 of 11)	244193	1006	CDH8	cadherin 8
449.126	chr15	28089114	28090140	18.1312	Intron (NM_001300984, Intron 22 of 22)	254834	4948	OCA2	OCA2 melanosomal transmembrane protein
421.796	chr1	68267295	68268302	13.4473	Intron (NM_018841, Intron 1 of 3)	-30173	100289178	GNG12-AS1	GNG12, DIRAS3 and WLS antisense RNA 1
418.934	chr6	85473603	85474954	38.1991	Promoter-TSS (NM_001080508)	38	9096	TBX18	T-box transcription factor 18
418.745	chr17	467239	468315	40.2189	Intron (NM_001366253, Intron 13 of 18)	150302	55275	VPS53	VPS53 subunit of GARP complex
415.419	chr21	17039082	17040084	8.33644	Intergenic	-62670	29761	USP25	ubiquitin specific peptidase 25
415.375	chr14	69521622	69522633	49.5228	Exon (NM_001284207, Exon 9 of 9)	75728	161159	ACTN1-AS1	ACTN1 antisense RNA 1
414.855	chr1	232278210	232279210	40.8636	Intergenic	217130	104472714	DISC1-IT1	DISC1 Intronic transcript 1
408.992	chr7	85219866	85220865	128.947	Intergenic	169927	105375380	LINC00972	long intergenic non-protein coding RNA 972
403.916	chr1	243881868	243882871	20.7643	Intron (NM_001370074, Intron 2 of 13)	124215	10000	AKT3	AKT serine/threonine kinase 3
398.788	chr7	84846393	84847397	318.243	Intergenic	-95648	223117	SEMA3D	semaphorin 3D
383.632	chr7	84854556	84855559	86.8285	Intergenic	-103810	223117	SEMA3D	semaphorin 3D
377.498	chr2	112732298	112733381	32.4997	Intron (NM_006343, Intron 6 of 18)	76655	10461	MERTK	MER proto-oncogene, tyrosine kinase
376.221	chr5	148637055	148638159	28.0675	Intron (NM_001301028, Intron 18 of 18)	-13794	134265	AFAP1L1	actin filament associated protein 1 like 1
366.908	chr6	84577021	84578022	23.0977	Intron (NM_016230, Intron 2 of 15)	8113	51167	CYB5R4	cytochrome b5 reductase 4
357.313	chr9	28051149	28052259	14.0088	Intron (NM_152570, Intron 5 of 6)	-477840	203228	C9orf72	C9orf72-SMCR8 complex subunit
355.531	chr9	23620881	23621880	7.37444	Intron (NR_121602, Intron 9 of 27)	51017	101929563	LOC101929563	uncharacterized LOC101929563
354.285	chr7	87198592	87200213	181.146	Intron (NM_001348946, Intron 5 of 27)	30798	5243	ABCB1	ATP binding cassette subfamily B member 1
352.611	chr7	84695315	84696314	81.5517	Intron (NM_152754, Intron 5 of 16)	55433	223117	SEMA3D	semaphorin 3D
352.137	chr4	42929627	42930664	14.0737	Intron (NM_001080476, Intron 1 of 3)	34862	389207	GRXCR1	glutaredoxin and cysteine rich domain containing 1
345.241	chr11	128077494	128078499	42.3812	Promoter-TSS (NR_146647)	-665	105369564	LINC02098	long intergenic non-protein coding RNA 2098
336.563	chr6	86174074	86175139	78.3285	Intron (NM_002526, Intron 1 of 8)	14805	4907	NT5E	5'-nucleotidase ecto
335.857	chr13	75709367	75710385	17.02	Intergenic	104641	647288	CTAGE11P	CTAGE family member 11, pseudogene
333.41	chr18	14104781	14105957	43.573	Exon (NM_145287, Exon 3 of 3)	27065	162655	ZNF519	zinc finger protein 519
330.579	chr8	69006916	69007915	30.7289	Intron (NM_025170, Intron 21 of 23)	143134	80243	PREX2	phosphatidylinositol-3,4,5-trisphosphate dependent Rac exchange factor 2
323.62	chr6	126268418	126269417	6.21082	Intergenic	-8999	135114	HINT3	histidine triad nucleotide binding protein 3
311.84	chr4	170085829	170086962	14.7717	Intron (NM_020870, Intron 2 of 11)	105712	57630	SH3RF1	SH3 domain containing ring finger 1
310.207	chr13	93921652	93922685	28.0139	Intron (NM_005708, Intron 1 of 8)	43108	10082	GPC6	glypican 6
303.815	chr1	52624748	52625751	8.2845	Intron (NM_004799, Intron 1 of 18)	17483	9372	ZFYVE9	zinc finger FYVE-type containing 9
302.98	chr8	37350570	37351909	21.1147	Non-coding (NR_121620, Exon 1 of 7)	192	100507420	LINC01605	long intergenic non-protein coding RNA 1605
302.824	chr8	32084732	32085741	24.7803	Intron (NM_013962, Intron 1 of 4)	201502	100856811	NRG1-IT1	NRG1 Intronic transcript 1
302.743	chr4	111012297	111013296	8.15647	Intron (NM_024090, Intron 2 of 3)	106975	79071	ELOVL6	ELOVL fatty acid elongase 6
301.512	chr19	21365845	21366858	45.9052	Non-coding (NR_138052, Exon 6 of 7)	41508	170959	ZNF431	zinc finger protein 431
301.317	chr2	237771320	237772351	12.0659	Intergenic	192975	93463	LOC93463	uncharacterized LOC93463
300.142	chr11	123045079	123046078	15.5045	Intron (NM_024769, Intron 1 of 6)	20378	79827	CLMP	CXADR like membrane protein
298.787	chr7	84789162	84790163	262.652	Intergenic	-38415	223117	SEMA3D	semaphorin 3D
295.105	chr18	6958801	6959841	26.4752	Intron (NM_005559, Intron 54 of 62)	4645	101927188	LOC101927188	uncharacterized LOC101927188
294.074	chr6	138150462	138151461	12.2066	Intron (NR_049793, Intron 3 of 3)	-37435	7128	TNFAIP3	TNF alpha induced protein 3
292.635	chr6	130921600	130922733	26.6632	Intergenic	163904	114801	TMEM200A	transmembrane protein 200A
290.85	chr8	54324015	54325018	12.0251	Intergenic	112009	100507516	LOC100507516	uncharacterized LOC100507516
290.52	chr1	248020379	248021387	30.7963	Exon (NM_015431, Exon 1 of 6)	394	25893	TRIM58	tripartite motif containing 58
286.764	chr21	23086396	23087415	11.6707	Intergenic	22734	378828	LINC00317	long intergenic non-protein coding RNA 317
285.281	chr1	240254619	240255618	14.7394	Promoter-TSS (NM_020066)	-65	56776	FMN2	formin 2
279.897	chr18	6729425	6730425	26.006	Promoter-TSS (NR_134645)	-64	101927168	LOC101927168	uncharacterized LOC101927168
278.818	chr7	84953171	84954174	448.598	Intergenic	-96766	105375380	LINC00972	long intergenic non-protein coding RNA 972
278.36	chr6	83668992	83669991	25.8895	Intron (NR_146809, Intron 8 of 9)	106069	90025	UBE3D	ubiquitin protein ligase E3D
278.33	chr1	240448065	240449065	28.1596	Intron (NM_001348094, Intron 5 of 14)	193382	56776	FMN2	formin 2
278.16	chr8	75009883	75010883	28.8417	Intergenic	106756	23643	LY96	lymphocyte antigen 96
277.018	chr16	64194972	64195983	14.1442	Intergenic	960489	1009	CDH11	cadherin 11
276.905	chr6	77743446	77744452	28.4174	Intergenic	429790	3351	HTR1B	5-hydroxytryptamine receptor 1B
276.537	chr2	232478214	232479213	30.4857	Intergenic	21138	165100	TEX44	testis expressed 44
273.818	chr6	16543842	16544841	14.2108	Intron (NM_001357857, Intron 5 of 8)	216074	6310	ATXN1	ataxin 1
272.188	chr14	24640621	24641665	27.0363	Promoter-TSS (NM_005132)	-146	9985	REC8	REC8 meiotic recombination protein
269.396	chr2	234372901	234373900	11.1736	Intron (NM_152879, Intron 27 of 29)	76600	8527	DGKD	diacylglycerol kinase delta
267.134	chr2	100482533	100483532	13.8051	Intron (NM_002285, Intron 6 of 23)	239013	3899	AFF3	AF4/FMR2 family member 3
266.995	chr4	22970586	22971596	10.9657	Intergenic	255379	57733	GBA3	glucosylceramidase beta 3 (gene/pseudogene)
266.952	chr8	69671822	69672842	37.8334	Intron (NM_001349479, Intron 9 of 11)	344093	100505718	LINC01592	long intergenic non-protein coding RNA 1592
266.763	chr8	120598345	120599397	59.8764	Intron (NM_001330600, Intron 14 of 25)	6377	5168	ENPP2	ectonucleotide pyrophosphatase/phosphodiesterase 2
266.317	chr7	84703046	84705008	166.266	Intron (NM_152754, Intron 3 of 16)	47220	223117	SEMA3D	semaphorin 3D
264.328	chr14	33194123	33195122	8.19636	Intron (NM_004274, Intron 9 of 13)	-213463	64067	NPAS3	neuronal PAS domain protein 3
260.147	chr12	6395295	6396635	18.0474	Intergenic	-23637	55200	PLEKHG6	pleckstrin homology and RhoGEF domain containing G6
258.972	chr7	85118416	85119416	225.627	TTS (NR_134240)	68478	105375380	LINC00972	long intergenic non-protein coding RNA 972
257.847	chr7	84610605	84611605	283.043	Intergenic	140142	223117	SEMA3D	semaphorin 3D
257.694	chr15	28182747	28183750	11.9913	Intron (NM_001300984, Intron 17 of 22)	161213	4948	OCA2	OCA2 melanosomal transmembrane protein
256.459	chr11	113423705	113424706	24.713	Intergenic	-78085	1813	DRD2	dopamine receptor D2
254.661	chr6	138085450	138086449	9.34567	Intergenic	-25775	100507406	LINC02539	long intergenic non-protein coding RNA 2539
254.447	chr7	87077356	87078444	143.525	Intron (NM_000443, Intron 8 of 27)	27096	5244	ABCB4	ATP binding cassette subfamily B member 4
252.435	chr3	44039849	44040848	27.2586	Intergenic	-115356	406929	MIR138-1	microRNA 138-1
249.673	chr6	19012944	19013949	11.4179	Intergenic	167265	101928519	LOC101928519	uncharacterized LOC101928519
247.664	chr11	97836564	97837572	10.1508	Intergenic	-1054611	53942	CNTN5	contactin 5
247.048	chr21	29021344	29022343	10.2612	Intergenic	-72855	54088	LINC00113	long intergenic non-protein coding RNA 113
246.505	chr9	36624936	36625946	12.6592	Intron (NM_014791, Intron 8 of 17)	52549	9833	MELK	maternal embryonic leucine zipper kinase
244.038	chr7	85111436	85113142	105.662	Intron (NR_134240, Intron 3 of 3)	61851	105375380	LINC00972	long intergenic non-protein coding RNA 972
239.872	chr7	88084675	88085679	242.37	Intergenic	-148968	79689	STEAP4	STEAP4 metalloreductase
239.577	chr7	87064619	87065628	450.2	Intron (NM_000443, Intron 14 of 27)	39873	5244	ABCB4	ATP binding cassette subfamily B member 4
237.552	chr2	239078110	239079124	37.7437	TTS (NM_030768)	11006	151176	ERFE	erythroferrone
235.854	chr1	13954927	13955926	12.9825	Intergenic	43471	10630	PDPN	podoplanin
235.153	chr2	202014143	202015214	19.0909	Intron (NR_147243, Intron 8 of 10)	7837	65072	CFLAR-AS1	CFLAR antisense RNA 1
233.39	chr9	27924232	27925231	8.32676	Intergenic	-350867	203228	C9orf72	C9orf72-SMCR8 complex subunit
231.545	chr20	8125090	8126105	11.7842	Intron (NM_182734, Intron 1 of 32)	12684	23236	PLCB1	phospholipase C beta 1
230.538	chr7	84815687	84816708	2179.25	Intergenic	-64950	223117	SEMA3D	semaphorin 3D
228.741	chr7	87196125	87197127	111.234	Intron (NM_001348946, Intron 5 of 27)	33574	5243	ABCB1	ATP binding cassette subfamily B member 1
227.756	chr7	84633366	84634427	95.6353	Intron (NM_152754, Intron 16 of 16)	117351	223117	SEMA3D	semaphorin 3D
225.353	chr6	69735903	69737304	21.9447	Intron (NM_001704, Intron 13 of 31)	391429	577	ADGRB3	adhesion G protein-coupled receptor B3
224.983	chrX	23770582	23771581	9.3484	Intergenic	-9688	23597	ACOT9	acyl-CoA thioesterase 9
224.405	chr7	137871425	137872440	13.25	Intergenic	63428	100616226	MIR4468	microRNA 4468
221.247	chr6	5190355	5191418	10.8011	Intron (NM_001164840, Intron 2 of 2)	-42330	100500900	MIR3691	microRNA 3691
218.477	chr1	59229721	59230720	11.3491	Intergenic	19499	3725	JUN	Jun proto-oncogene, AP-1 transcription factor subunit
216.392	chr2	227526189	227527224	11.2734	Intergenic	-3197	100847053	MIR5702	microRNA 5702
216.278	chr16	48036809	48037813	31.2057	Intergenic	37711	105371238	LINC02134	long intergenic non-protein coding RNA 2134
215.666	chr11	128372319	128374102	36.4465	Intron (NM_001143820, Intron 3 of 9)	18995	2113	ETS1	ETS proto-oncogene 1, transcription factor
213.428	chr1	100474686	100475696	10.9674	Intron (NM_012243, Intron 4 of 7)	-28460	64645	MFSD14A	major facilitator superfamily domain containing 14A
209.815	chr11	98320662	98321679	8.52963	Intergenic	-570509	53942	CNTN5	contactin 5
209.463	chr3	55225608	55226607	21.6717	Intergenic	13907	105377096	LINC02017	long intergenic non-protein coding RNA 2017
207.027	chr18	26734629	26735660	15.8437	Intergenic	-978050	1000	CDH2	cadherin 2
206.173	chr6	67037926	67038925	7.99984	Intergenic	540653	442229	SLC25A51P1	SLC25A51 pseudogene 1
203.086	chr11	100881330	100882331	13.7373	Intergenic	76825	109616988	SNORD13I	small nucleolar RNA, C/D box 13I
202.704	chr8	32572328	32573395	19.7256	Intron (NM_001322205, Intron 1 of 8)	-6410	3084	NRG1	neuregulin 1
202.524	chr2	241519210	241520209	15.8227	3' UTR (NM_018226, Exon 11 of 11)	6024	101752400	CAPN10-DT	CAPN10 divergent transcript
201.906	chr1	244080465	244081464	20.9845	Intron (NR_033883, Intron 1 of 11)	260	339529	LINC02774	long intergenic non-protein coding RNA 2774
200.43	chr9	12923357	12924386	12.9072	Intergenic	48761	106635615	SNORD137	small nucleolar RNA, C/D box 137
200.292	chr9	43795202	43796468	16.4305	Intron (NM_001201380, Intron 3 of 23)	110639	643827	CNTNAP3P2	CNTNAP3 pseudogene 2
199.663	chr21	16252958	16253990	18.3819	Intron (NR_146322, Intron 1 of 3)	37515	107987295	LINC02246	long intergenic non-protein coding RNA 2246
198.822	chr7	65512083	65513183	14.8281	Intergenic	-28173	435	ASL	argininosuccinate lyase
198.538	chr8	69983431	69984430	20.5468	Intron (NR_039986, Intron 1 of 4)	32495	100505718	LINC01592	long intergenic non-protein coding RNA 1592
198.448	chr8	52307142	52308144	84.495	Intron (NM_144651, Intron 17 of 22)	414362	137902	PXDNL	peroxidasin like
198.409	chr4	122589127	122590230	28.0201	Exon (NM_001154, Exon 13 of 13)	28457	308	ANXA5	annexin A5
197.006	chr11	114165370	114167461	59.1957	Promoter-TSS (NM_006169)	-120	4837	NNMT	nicotinamide N-methyltransferase
196.639	chr8	118823016	118824016	76.4087	Intron (NM_000127, Intron 8 of 10)	109636	109623457	SNORD168	small nucleolar RNA, C/D box 168
195.529	chr11	94712017	94713016	30.4434	Intron (NM_018039, Intron 2 of 2)	5643	55693	KDM4D	lysine demethylase 4D
195.093	chrX	110283326	110284812	12.2743	Intron (NM_001128166, Intron 2 of 15)	-55350	5063	PAK3	p21 (RAC1) activated kinase 3
194.278	chr4	85906805	85907804	5.65475	Intron (NR_152782, Intron 2 of 3)	18667	404201	WDFY3-AS2	WDFY3 antisense RNA 2
193.653	chr21	14965722	14966732	19.9119	Intergenic	-16271	317754	POTED	POTE ankyrin domain family member D
192.913	chr7	87203608	87204607	408.085	Intron (NM_001348946, Intron 4 of 27)	26093	5243	ABCB1	ATP binding cassette subfamily B member 1
192.154	chr13	94254954	94255953	9.98792	Intron (NM_005708, Intron 2 of 8)	255273	100873973	GPC6-AS2	GPC6 antisense RNA 2
190.779	chr4	186226643	186227937	15.2493	Intron (NM_001317781, Intron 6 of 18)	72862	55805	LRP2BP	LRP2 binding protein
190.263	chr7	85158255	85159937	184.006	Intergenic	108658	105375380	LINC00972	long intergenic non-protein coding RNA 972
189.743	chr7	25019325	25020371	37.4201	Promoter-TSS (NM_015550)	-51	26031	OSBPL3	oxysterol binding protein like 3
189.684	chr11	128392089	128393189	53.5714	Promoter-TSS (NM_001330451)	354	102466104	MIR6090	microRNA 6090
189.576	chr19	21299621	21301118	39.3573	Exon (NM_182515, Exon 5 of 5)	-24474	170959	ZNF431	zinc finger protein 431
189.569	chr9	19875296	19876330	17.1379	Intergenic	-88796	25769	SLC24A2	solute carrier family 24 member 2
189.531	chr1	226966010	226967009	5.88961	Intergenic	-39633	3707	ITPKB	inositol-trisphosphate 3-kinase B
189.421	chr3	65530809	65531823	9.99211	Intron (NM_001033057, Intron 2 of 22)	-348175	100873983	MAGI1-AS1	MAGI1 antisense RNA 1
188.739	chr8	54335631	54336630	14.6533	Intergenic	100395	100507516	LOC100507516	uncharacterized LOC100507516
186.666	chr17	18314969	18315973	17.3806	Non-coding (NR_104343, Exon 1 of 2)	998	400579	LINC02076	long intergenic non-protein coding RNA 2076
186.484	chr9	17408195	17409197	17.3229	Intron (NM_001365029, Intron 15 of 25)	-170368	6456	SH3GL2	SH3 domain containing GRB2 like 2, endophilin A1
186.453	chr5	81701114	81702150	18.6946	Intergenic	126351	92270	ATP6AP1L	ATPase H+ transporting accessory protein 1 like
186.155	chr7	85143972	85144974	135.118	Intergenic	94035	105375380	LINC00972	long intergenic non-protein coding RNA 972
185.575	chr1	36866309	36867329	29.4197	Intergenic	-3310	84967	LSM10	LSM10, U7 small nuclear RNA associated
185.266	chr7	84697933	84698932	159.143	Intron (NM_152754, Intron 4 of 16)	52815	223117	SEMA3D	semaphorin 3D
184.176	chr2	106669270	106670272	24.0578	Intergenic	-12373	84417	ECRG4	ECRG4 augurin precursor
182.35	chr18	6960346	6961386	31.3756	Intron (NM_005559, Intron 53 of 62)	6190	101927188	LOC101927188	uncharacterized LOC101927188
181.552	chr18	5629456	5631200	31.3053	Intergenic	-1338	23136	EPB41L3	erythrocyte membrane protein band 4.1 like 3
180.587	chr8	72755694	72756778	43.196	Promoter-TSS (NR_033651)	-115	100132891	MSC-AS1	MSC antisense RNA 1
180.366	chr8	67344131	67345172	27.7803	Promoter-TSS (NM_144650)	-88	137872	ADHFE1	alcohol dehydrogenase iron containing 1
178.389	chr12	1582968	1583978	45.7569	Intron (NR_027948, Intron 19 of 19)	-26184	100292680	LINC00942	long intergenic non-protein coding RNA 942
177.564	chr8	70494660	70495750	17.7217	Intron (NR_156414, Intron 5 of 20)	-9930	23213	SULF1	sulfatase 1
177.466	chr7	87255475	87256474	320.463	Intron (NM_001348945, Intron 2 of 31)	-1740	154661	RUNDC3B	RUN domain containing 3B
176.958	chr19	38182755	38183754	27.5667	Promoter-TSS (NM_152605)	-38	163115	ZNF781	zinc finger protein 781
176.439	chr2	105385190	105386249	15.5808	Intergenic	-11542	284998	LINC01114	long intergenic non-protein coding RNA 1114
176.423	chr1	238648027	238649027	15.3061	Intron (NR_015407, Intron 1 of 1)	790	339535	LINC01139	long intergenic non-protein coding RNA 1139
176.045	chr1	235904292	235905306	8.98059	Exon (NM_000081, Exon 31 of 53)	-90745	2786	GNG4	G protein subunit gamma 4
175.882	chr3	110245251	110246836	33.4038	Intergenic	542763	100506555	NECTIN3-AS1	NECTIN3 antisense RNA 1
175.633	chr11	100610077	100611104	8.88487	Intron (NM_152432, Intron 1 of 23)	-51904	100128386	LOC100128386	uncharacterized LOC100128386
175.41	chr19	31847541	31848551	9.02288	Intergenic	-7704	57616	TSHZ3	teashirt zinc finger homeobox 3
175.228	chr4	5476203	5477202	7.29017	Intron (NM_001306082, Intron 12 of 12)	-49594	10141	LINC01587	long intergenic non-protein coding RNA 1587
175.117	chr7	84805195	84806195	128.973	Intergenic	-54448	223117	SEMA3D	semaphorin 3D
175.096	chr4	15715484	15716486	27.118	Intron (NM_004334, Intron 4 of 8)	11297	683	BST1	bone marrow stromal cell antigen 1
174.57	chr17	8825497	8826541	8.6501	Intron (NM_001251855, Intron 1 of 17)	-10185	23533	PIK3R5	phosphoinositide-3-kinase regulatory subunit 5
174.475	chr7	85138052	85139054	153.816	Intergenic	88115	105375380	LINC00972	long intergenic non-protein coding RNA 972
172.742	chr6	77501800	77502829	24.3171	Intergenic	-198974	105377860	LINC02540	long intergenic non-protein coding RNA 2540
172.556	chr3	55194154	55195240	26.8809	Intergenic	-17503	105377096	LINC02017	long intergenic non-protein coding RNA 2017
172.476	chr1	20930363	20931364	17.8662	Intron (NM_001785, Intron 1 of 3)	15273	978	CDA	cytidine deaminase
172.332	chr1	98046760	98047762	30.3712	Intron (NM_000110, Intron 10 of 22)	-215216	100873933	DPYD-AS2	DPYD antisense RNA 2
171.69	chr17	36173043	36174060	15.7894	Intergenic	-68501	6928	HNF1B	HNF1 homeobox B
171.454	chr7	87274645	87276068	66.694	Intron (NM_001134405, Intron 1 of 10)	17642	154661	RUNDC3B	RUN domain containing 3B
170.96	chr11	104034429	104035589	23.6233	Promoter-TSS (NM_033135)	-134	80310	PDGFD	platelet derived growth factor D
170.942	chr16	63651494	63652506	21.6792	Intergenic	1503966	1009	CDH11	cadherin 11
170.672	chr6	100912430	100913433	15.0539	Intergenic	-1380	6492	SIM1	SIM bHLH transcription factor 1
170.422	chr4	85420119	85421166	22.5998	Intergenic	-1255	4825	NKX6-1	NK6 homeobox 1
169.684	chr21	16596327	16597383	23.9758	Intergenic	-159534	8204	NRIP1	nuclear receptor interacting protein 1
168.482	chr11	12439304	12440562	13.9219	Intron (NM_018222, Intron 1 of 12)	40815	55742	PARVA	parvin alpha
167.577	chr8	2075013	2076012	51.7286	Intron (NM_003970, Intron 31 of 36)	50843	102465695	MIR7160	microRNA 7160
167.483	chr16	60803797	60804997	13.0574	Intergenic	285273	100616345	MIR4426	microRNA 4426
167.454	chr7	84873030	84874029	57.0678	Intergenic	-122282	223117	SEMA3D	semaphorin 3D
167.356	chr8	132826273	132827593	11.8109	Intergenic	-89407	23167	EFR3A	EFR3 homolog A
167.251	chr9	35996336	35997336	39.8454	Intergenic	-38685	56656	OR2S2	olfactory receptor family 2 subfamily S member 2 (gene/pseudogene)
166.853	chr3	55224004	55225003	15.8462	Intergenic	12303	105377096	LINC02017	long intergenic non-protein coding RNA 2017
165.911	chr6	77748188	77749187	17.2618	Intergenic	425052	3351	HTR1B	5-hydroxytryptamine receptor 1B
164.18	chr7	84700364	84701383	151.537	Intron (NM_152754, Intron 4 of 16)	50374	223117	SEMA3D	semaphorin 3D
164.073	chr17	28514944	28515943	8.49888	Intergenic	47272	6532	SLC6A4	solute carrier family 6 member 4
163.036	chr14	90096840	90097839	74.3901	Intergenic	-11830	1112	FOXN3	forkhead box N3
162.803	chr9	18490329	18491348	29.8301	Intron (NM_001040272, Intron 1 of 28)	16687	92949	ADAMTSL1	ADAMTS like 1
161.506	chr11	123299761	123301311	29.1674	Promoter-TSS (NM_001354837)	-441	57476	GRAMD1B	GRAM domain containing 1B
160.239	chr20	9180892	9181920	20.1756	Intron (NM_001172646, Intron 1 of 37)	-16631	5332	PLCB4	phospholipase C beta 4
159.721	chr19	3379627	3380626	8.27483	Intron (NM_001245002, Intron 1 of 10)	13545	4782	NFIC	nuclear factor I C
159.3	chr16	64395791	64396805	8.16657	Intergenic	759668	1009	CDH11	cadherin 11
158.658	chr17	2901401	2902580	32.1355	Intron (NM_001100398, Intron 13 of 23)	-32801	101927911	LOC101927911	uncharacterized LOC101927911
158.344	chr6	87861547	87862546	29.5985	Intergenic	-3237	23036	ZNF292	zinc finger protein 292
157.786	chr4	177363989	177364988	9.19606	Intergenic	123371	60559	SPCS3	signal peptidase complex subunit 3
157.786	chr9	113388045	113389044	8.5022	Intergenic	-42527	4593	MUSK	muscle associated receptor tyrosine kinase
156.947	chr8	64599142	64600148	18.4824	Intergenic	-82343	286184	LINC01289	long intergenic non-protein coding RNA 1289
156.937	chr20	43640968	43641993	15.3306	Intron (NM_001352385, Intron 9 of 11)	46327	6789	STK4	serine/threonine kinase 4
155.468	chr4	140785390	140786389	6.47275	Intron (NM_018717, Intron 2 of 4)	198916	4258	MGST2	microsomal glutathione S-transferase 2
155.24	chr1	98788218	98790059	27.0149	Intergenic	112871	729987	LINC01776	long intergenic non-protein coding RNA 1776
155.088	chr3	106483826	106484947	20.0861	Intergenic	475099	100302640	LINC00882	long intergenic non-protein coding RNA 882
154.223	chr1	47573157	47574162	23.936	Intron (NM_178134, Intron 9 of 11)	-29438	284541	CYP4A22	cytochrome P450 family 4 subfamily A member 22
153.587	chrX	48345427	48346427	31.4013	Intergenic	11340	24140	FTSJ1	FtsJ RNA 2'-O-methyltransferase 1
153.225	chr16	13400803	13401854	24.0024	Intergenic	405873	729993	SHISA9	shisa family member 9
153.149	chr4	41526823	41527822	7.971	Intron (NM_001330791, Intron 3 of 25)	-12852	22998	LIMCH1	LIM and calponin homology domains 1
152.673	chr17	13442117	13443116	14.3035	Intron (NM_006042, Intron 1 of 1)	4347	100302287	MIR548H3	microRNA 548h-3
152.627	chr14	59197867	59198872	39.291	Intergenic	92814	51339	DACT1	dishevelled binding antagonist of beta catenin 1
152.21	chr7	84889944	84892654	111.133	Intergenic	-140052	223117	SEMA3D	semaphorin 3D
152.04	chr8	55466409	55467471	13.4004	Intergenic	-61716	6101	RP1	RP1 axonemal microtubule associated
151.947	chr21	15448439	15449459	21.6222	Intergenic	-96184	391267	ANKRD20A11P	ankyrin repeat domain 20 family member A11, pseudogene
151.376	chr2	223652211	223653210	46.3652	Intergenic	-73044	2181	ACSL3	acyl-CoA synthetase long chain family member 3
150.61	chr8	56013584	56014610	24.139	Promoter-TSS (NM_052898)	-491	114786	XKR4	XK related 4
150.585	chr18	5890183	5891207	15.2282	Exon (NM_001080209, Exon 3 of 3)	5258	645369	TMEM200C	transmembrane protein 200C
149.872	chr19	21182117	21183177	16.4248	Intergenic	-20816	80264	ZNF430	zinc finger protein 430
148.796	chr3	137762183	137763186	23.0449	Intergenic	33677	51208	CLDN18	claudin 18
148.55	chr6	70834770	70835778	13.7956	Intron (NM_001858, Intron 17 of 50)	157626	1297	COL9A1	collagen type IX alpha 1 chain
148.404	chr7	84630024	84631023	81.8683	Intron (NM_152754, Intron 16 of 16)	120724	223117	SEMA3D	semaphorin 3D
148.391	chr6	75316109	75317109	11.6794	Intron (NR_110856, Intron 2 of 3)	521889	109623475	SNORD156	small nucleolar RNA, C/D box 156
148.173	chr6	11033798	11034797	10.5677	Intron (NM_017770, Intron 1 of 7)	-9694	100506409	ELOVL2-AS1	ELOVL2 antisense RNA 1
147.823	chr1	86077160	86078242	25.5501	Intergenic	31257	3491	CCN1	cellular communication network factor 1
146.858	chr7	84992417	84993418	121.776	Intergenic	-57521	105375380	LINC00972	long intergenic non-protein coding RNA 972
146.7	chr7	87076270	87077270	131.122	Intron (NM_000443, Intron 8 of 27)	28226	5244	ABCB4	ATP binding cassette subfamily B member 4
146.508	chr20	8996079	8997088	61.0059	Intergenic	-53118	5332	PLCB4	phospholipase C beta 4
146.2	chr13	109923942	109924941	22.769	Intergenic	-104790	100885782	MYO16-AS1	MYO16 antisense RNA 1
146.193	chr2	47649431	47650430	7.61129	Intron (NM_001258281, Intron 7 of 16)	19724	4436	MSH2	mutS homolog 2
146.057	chr11	106343441	106344440	9.12515	Intergenic	221806	101928535	LOC101928535	uncharacterized LOC101928535
145.958	chr11	112374480	112375481	22.8016	Intron (NR_120559, Intron 2 of 2)	19912	101928823	LINC02763	long intergenic non-protein coding RNA 2763
145.861	chr1	38424080	38425083	21.3131	Intron (NM_001320830, Intron 14 of 14)	-11852	3633	INPP5B	inositol polyphosphate-5-phosphatase B
145.611	chr1	17494237	17495240	21.0774	Intergenic	-21546	400743	LINC02783	long intergenic non-protein coding RNA 2783
144.955	chr9	83643087	83644102	7.54418	Intergenic	660856	7088	TLE1	TLE family member 1, transcriptional corepressor
144.95	chr1	43938198	43939217	20.6596	Intergenic	-19047	81888	HYI	hydroxypyruvate isomerase (putative)
144.252	chr7	87146092	87147092	179.804	Intron (NM_001348946, Intron 23 of 27)	-41573	5244	ABCB4	ATP binding cassette subfamily B member 4
144.226	chr9	16963968	16964996	34.9039	Intergenic	-93814	54796	BNC2	basonuclin 2
144.185	chr7	88152638	88154251	122.406	Intergenic	-217235	79689	STEAP4	STEAP4 metalloreductase
144.037	chr6	136978417	136979416	7.49981	Intron (NM_005923, Intron 9 of 29)	28664	101928461	LOC101928461	uncharacterized LOC101928461
143.941	chr9	124815425	124816482	12.7512	Intron (NM_194252, Intron 1 of 3)	39932	158135	TTLL11	tubulin tyrosine ligase like 11
143.782	chr5	119781388	119782387	11.5077	Intergenic	-18086	51334	PRR16	proline rich 16
142.463	chr11	89113914	89114922	11.7636	Intron (NM_001300995, Intron 11 of 16)	109510	50507	NOX4	NADPH oxidase 4
142.419	chr12	1584800	1585890	39.3376	Intron (NR_027948, Intron 19 of 19)	-24312	100292680	LINC00942	long intergenic non-protein coding RNA 942
141.687	chr13	84616975	84617974	13.2809	Intergenic	-97263	100874128	LINC00333	long intergenic non-protein coding RNA 333
141.352	chr9	114803732	114804738	39.0742	Exon (NM_001282643, Exon 15 of 16)	109855	100616114	MIR4668	microRNA 4668
141.058	chr10	44108475	44109826	9.77986	Intron (NM_145312, Intron 4 of 4)	7264	220992	ZNF485	zinc finger protein 485
140.93	chr8	32435203	32436213	14.5187	Intron (NM_001160005, Intron 1 of 4)	-17636	3084	NRG1	neuregulin 1
140.514	chr9	26292591	26293672	29.9566	Intergenic	226458	100506422	LOC100506422	putative deoxyuridine 5'-triphosphate nucleotidohydrolase-like protein FLJ16323
140.031	chr3	45052177	45053210	12.9516	Intron (NM_015004, Intron 7 of 7)	-15102	7123	CLEC3B	C-type lectin domain family 3 member B
139.706	chr1	159818399	159819398	19.0237	Intron (NR_147123, Intron 1 of 3)	5929	284677	SNHG28	small nucleolar RNA host gene 28
139.63	chr7	84916151	84917155	175.512	Intergenic	-133785	105375380	LINC00972	long intergenic non-protein coding RNA 972
139.054	chr1	224075382	224076382	36.2566	Intergenic	-42208	7159	TP53BP2	tumor protein p53 binding protein 2
138.859	chr9	117126038	117127050	13.5059	Intron (NM_001317950, Intron 7 of 21)	23718	80709	AKNA	AT-hook transcription factor
138.266	chr16	698798	699797	15.5594	Promoter-TSS (NR_135177)	16	105371038	LOC105371038	uncharacterized LOC105371038
137.877	chr11	128366664	128367674	42.3504	Intron (NM_001143820, Intron 3 of 9)	25036	2113	ETS1	ETS proto-oncogene 1, transcription factor
137.686	chr12	10184022	10185035	14.1448	Intron (NM_207345, Intron 1 of 8)	1247	283420	CLEC9A	C-type lectin domain containing 9A
137.447	chr11	87908184	87909184	14.2418	Promoter-TSS (NR_036124)	-73	23682	RAB38	RAB38, member RAS oncogene family
137.2	chr7	85055902	85056920	127.063	Intron (NR_134240, Intron 1 of 3)	5973	105375380	LINC00972	long intergenic non-protein coding RNA 972
136.684	chr3	41724764	41725772	28.7983	Intron (NR_136342, Intron 25 of 34)	278327	54986	ULK4	unc-51 like kinase 4
136.626	chr13	75017460	75018989	11.2237	Intergenic	24914	100874151	LINC00381	long intergenic non-protein coding RNA 381
136.177	chr11	130743383	130744385	14.1444	Intergenic	-3742	103611081	LOC103611081	uncharacterized LOC103611081
136.087	chr7	84972423	84973422	75.2141	Intergenic	-77516	105375380	LINC00972	long intergenic non-protein coding RNA 972
135.911	chr8	49448114	49449156	35.7422	Intergenic	-15492	101929268	LOC101929268	uncharacterized LOC101929268
135.881	chr12	106477435	106478442	36.6421	Intron (NM_014840, Intron 3 of 6)	55873	9891	NUAK1	NUAK family kinase 1
135.219	chr20	810542	811542	19.703	Intergenic	-3316	83541	FAM110A	family with sequence similarity 110 member A
135.201	chr14	37088724	37089723	7.04294	Intergenic	-37404	26257	NKX2-8	NK2 homeobox 8
135.167	chr8	42149767	42150775	71.9901	Intron (NR_033819, Intron 4 of 20)	21451	3551	IKBKB	inhibitor of nuclear factor kappa B kinase subunit beta
135.122	chr20	1547616	1548622	35.5424	Intron (NM_001330639, Intron 2 of 3)	-9768	128646	SIRPD	signal regulatory protein delta
134.559	chr2	230353329	230354401	18.2919	Intron (NM_139072, Intron 6 of 12)	-217862	55022	PID1	phosphotyrosine interaction domain containing 1
134.121	chr8	32588898	32589897	7.18972	Intron (NM_001322202, Intron 3 of 7)	10044	3084	NRG1	neuregulin 1
133.954	chr6	83571812	83572819	13.8461	Intergenic	203245	90025	UBE3D	ubiquitin protein ligase E3D
132.996	chr14	85997625	85998625	40.0337	5' UTR (NM_001346145, Exon 1 of 2)	389	23768	FLRT2	fibronectin leucine rich transmembrane protein 2
131.773	chr11	111615766	111616765	10.985	Intron (NM_001177563, Intron 9 of 12)	20848	5519	PPP2R1B	protein phosphatase 2 scaffold subunit Abeta
131.654	chr7	132737739	132738752	71.3767	Intron (NM_001317178, Intron 2 of 4)	-18570	100500804	MIR3654	microRNA 3654
131.554	chr4	169449217	169450216	14.8007	Intron (NM_016081, Intron 2 of 20)	31513	23022	PALLD	palladin, cytoskeletal associated protein
131.225	chr2	231645919	231646918	12.3072	Intron (NM_001130849, Intron 2 of 8)	68155	51719	CAB39	calcium binding protein 39
130.71	chr4	171312281	171313280	13.6214	Intergenic	165038	101928223	LINC01612	long intergenic non-protein coding RNA 1612
130.686	chr6	69799646	69800706	16.3658	Intron (NM_001704, Intron 17 of 31)	455002	577	ADGRB3	adhesion G protein-coupled receptor B3
129.873	chr11	121915533	121916617	10.4332	Intron (NR_137178, Intron 3 of 4)	54477	406911	MIR125B1	microRNA 125b-1
129.558	chr12	116400220	116401227	42.8207	Intron (NM_015335, Intron 30 of 30)	185736	693205	MIR620	microRNA 620
129.326	chr4	187421620	187422651	9.83792	Promoter-TSS (NR_033900)	77	285441	F11-AS1	F11 antisense RNA 1
129.287	chr1	33564572	33565580	33.8907	Intron (NM_001350401, Intron 10 of 11)	17297	113451	AZIN2	antizyme inhibitor 2
129.144	chr2	239347748	239348750	33.4607	Intron (NM_001040445, Intron 3 of 4)	12681	51665	ASB1	ankyrin repeat and SOCS box containing 1
129.085	chr11	128337198	128338198	65.4997	Intron (NM_001330451, Intron 5 of 6)	54507	2113	ETS1	ETS proto-oncogene 1, transcription factor
128.843	chr1	4726556	4727555	24.0663	Intron (NM_001042478, Intron 1 of 5)	12386	55966	AJAP1	adherens junctions associated protein 1
128.297	chr6	165595094	165596113	13.0813	Intergenic	127491	168090	C6orf118	chromosome 6 open reading frame 118
128.258	chr12	118745080	118746084	27.0689	Intron (NM_001346488, Intron 1 of 21)	51928	51347	TAOK3	TAO kinase 3
128.1	chr8	60606914	60607988	12.4199	Intergenic	575682	100505501	LOC100505501	uncharacterized LOC100505501
128.035	chr3	185516743	185517929	22.3874	Intron (NR_138486, Intron 2 of 15)	21583	10644	IGF2BP2	insulin like growth factor 2 mRNA binding protein 2
127.965	chr4	23729659	23730869	11.4833	Intergenic	152651	10891	PPARGC1A	PPARG coactivator 1 alpha
127.766	chr7	46184593	46185748	22.2886	Intergenic	-224299	3486	IGFBP3	insulin like growth factor binding protein 3
127.762	chr2	147391570	147392569	23.2374	Intergenic	47444	728773	PABPC1P2	poly(A) binding protein cytoplasmic 1 pseudogene 2
127.343	chr2	236735812	236736815	21.7047	Intron (NM_014914, Intron 9 of 16)	-309748	27321	TNRC17	trinucleotide repeat containing 17
127.199	chr11	58634009	58635041	11.6796	Intergenic	-22348	219970	GLYATL2	glycine-N-acyltransferase like 2
126.699	chr9	2654991	2656008	19.4314	3' UTR (NM_001322225, Exon 18 of 18)	-33126	401491	VLDLR-AS1	VLDLR antisense RNA 1
126.224	chr11	22480193	22481305	10.6395	Intron (NR_120583, Intron 3 of 3)	32816	102723378	LINC01495	long intergenic non-protein coding RNA 1495
126.122	chr9	27864693	27865703	12.9475	Intergenic	-291334	203228	C9orf72	C9orf72-SMCR8 complex subunit
126.107	chr7	85230078	85231078	98.8212	Intergenic	180140	105375380	LINC00972	long intergenic non-protein coding RNA 972
125.923	chr12	59845832	59846847	10.3357	Intergenic	-143471	9194	SLC16A7	solute carrier family 16 member 7
125.884	chr21	36664269	36665268	6.56115	Intergenic	-243173	861	RUNX1	RUNX family transcription factor 1
125.82	chr19	4840854	4841853	11.753	Intron (NM_005817, Intron 7 of 7)	-9599	148022	TICAM1	toll like receptor adaptor molecule 1
125.613	chr11	12063527	12064526	16.5707	Intron (NR_135109, Intron 1 of 1)	11604	105376554	LINC02547	long intergenic non-protein coding RNA 2547
125.482	chr3	58549061	58550099	21.2905	TTS (NM_001282714)	13538	11170	FAM107A	family with sequence similarity 107 member A
125.447	chr2	241313341	241314386	29.0864	Intergenic	-61217	2817	GPC1	glypican 1
125.281	chr17	31270244	31271258	28.1847	3' UTR (NM_015544, Exon 8 of 8)	15580	26022	TMEM98	transmembrane protein 98
124.981	chr7	85050004	85051007	80.4018	Promoter-TSS (NR_134240)	67	105375380	LINC00972	long intergenic non-protein coding RNA 972
124.484	chr9	76693299	76694314	19.1596	Intergenic	-292641	101927358	LOC101927358	uncharacterized LOC101927358
124.269	chr6	1952647	1953653	25.7305	Intron (NM_001253846, Intron 6 of 10)	223075	2762	GMDS	GDP-mannose 4,6-dehydratase
124.203	chr12	68303833	68305064	16.9854	Intergenic	-18567	101927922	LINC01479	long intergenic non-protein coding RNA 1479
123.543	chr16	56659050	56660103	27.123	Promoter-TSS (NM_175617)	-117	4493	MT1E	metallothionein 1E
123.408	chr15	26075867	26076873	34.4529	Intron (NM_024490, Intron 1 of 20)	17602	100616474	MIR4715	microRNA 4715
123.368	chr1	236268944	236269995	16.86	Intergenic	-36370	7107	GPR137B	G protein-coupled receptor 137B
123.031	chr15	38064957	38065956	7.43976	Intergenic	-161352	145942	TMCO5A	transmembrane and coiled-coil domains 5A
122.959	chr3	117379766	117380765	11.5378	Intergenic	29507	105374057	LINC02024	long intergenic non-protein coding RNA 2024
122.779	chr8	43064455	43065459	20.3163	Intergenic	69350	138050	HGSNAT	heparan-alpha-glucosaminide N-acetyltransferase
122.684	chr6	54845620	54847157	25.7534	Intergenic	-124870	3062	HCRTR2	hypocretin receptor 2
122.499	chr6	169825194	169826205	53.6968	Intergenic	-171490	7058	THBS2	thrombospondin 2
122.486	chr19	52872662	52873661	11.4439	Promoter-TSS (NM_001145434)	-15	400713	ZNF880	zinc finger protein 880
122.439	chr9	81291884	81292934	10.8845	Intergenic	380368	29968	PSAT1	phosphoserine aminotransferase 1
122.342	chr11	123353458	123354457	10.2048	Intron (NM_001367420, Intron 2 of 20)	-26667	57476	GRAMD1B	GRAM domain containing 1B
121.838	chr2	164871490	164872555	16.6636	Intergenic	-279504	55137	FIGN	fidgetin, microtubule severing factor
121.751	chr2	105215977	105217008	54.4882	Intergenic	-89525	101927360	LINC01103	long intergenic non-protein coding RNA 1103
121.682	chr4	143290056	143291055	10.1502	Intron (NM_001101669, Intron 7 of 25)	477133	8821	INPP4B	inositol polyphosphate-4-phosphatase type II B
121.303	chr6	15283197	15284569	25.9429	Intron (NM_001267040, Intron 1 of 17)	34797	3720	JARID2	jumonji and AT-rich interaction domain containing 2
121.106	chr1	85795712	85797220	31.728	Intron (NM_001330655, Intron 4 of 5)	-54151	8915	BCL10	BCL10 immune signaling adaptor
121.034	chr18	14577640	14578639	8.85908	Intergenic	-34540	388468	POTEC	POTE ankyrin domain family member C
120.48	chr9	18378769	18379789	11.0745	Intergenic	-94872	92949	ADAMTSL1	ADAMTS like 1
119.887	chr21	39250919	39252035	11.1926	Intron (NM_002240, Intron 1 of 3)	37283	3763	KCNJ6	potassium voltage-gated channel subfamily J member 6
119.738	chr6	18216389	18217873	49.5449	Intron (NM_001364614, Intron 20 of 21)	47630	7913	DEK	DEK proto-oncogene
119.585	chr18	68703615	68704647	10.8181	Intergenic	-385941	220158	GTSCR1	Gilles de la Tourette syndrome chromosome region, candidate 1
119.262	chr7	88125493	88126843	54.1704	Intergenic	-189959	79689	STEAP4	STEAP4 metalloreductase
119.253	chr15	26030118	26031118	39.5843	Intron (NM_024490, Intron 1 of 20)	63354	100616474	MIR4715	microRNA 4715
119.124	chr6	143084013	143085012	8.1638	Intron (NM_006734, Intron 7 of 9)	-125486	153910	LOC153910	uncharacterized LOC153910
118.402	chr8	34334040	34335039	11.1136	Intergenic	-306900	103689844	LINC01288	long intergenic non-protein coding RNA 1288
117.702	chrX	67647978	67649730	41.9599	Intron (NM_002547, Intron 2 of 24)	4483	4983	OPHN1	oligophrenin 1
117.502	chr8	62923464	62924467	21.9242	Intergenic	121567	111082988	LINC02155	long intergenic non-protein coding RNA 2155
117.301	chr18	74171586	74172585	11.0112	Intron (NM_014643, Intron 2 of 7)	-31523	101927989	LOC101927989	uncharacterized LOC101927989
117.27	chr4	140793182	140794181	6.1157	Intron (NM_018717, Intron 2 of 4)	206708	4258	MGST2	microsomal glutathione S-transferase 2
117.129	chr19	23779184	23780349	23.3001	Intergenic	90248	171392	ZNF675	zinc finger protein 675
117.079	chr1	32409606	32410605	12.1588	Intergenic	-6136	8073	PTP4A2	protein tyrosine phosphatase 4A2
117.009	chr6	81250584	81251583	17.0861	Intergenic	434695	594	BCKDHB	branched chain keto acid dehydrogenase E1 subunit beta
116.736	chr7	84627688	84629478	129.537	3' UTR (NM_152754, Exon 17 of 17)	122664	223117	SEMA3D	semaphorin 3D
116.547	chr8	43352000	43353003	18.3117	Intergenic	204916	340441	POTEA	POTE ankyrin domain family member A
116.21	chr7	84851527	84852541	75.3086	Intergenic	-100787	223117	SEMA3D	semaphorin 3D
115.765	chr4	96187912	96188911	8.95746	Intron (NM_003728, Intron 4 of 15)	175769	658	BMPR1B	bone morphogenetic protein receptor type 1B
115.66	chr9	115818490	115819543	10.3021	Promoter-TSS (NM_001282515)	-12	7539	ZFP37	ZFP37 zinc finger protein
115.571	chr9	76555002	76556003	45.6187	Intergenic	-430945	101927358	LOC101927358	uncharacterized LOC101927358
115.421	chr20	11822638	11823637	9.23076	Intron (NR_110635, Intron 1 of 1)	28226	728450	LINC00687	long intergenic non-protein coding RNA 687
115.343	chr8	55541495	55542580	35.6311	Exon (NM_006269, Exon 4 of 4)	13381	6101	RP1	RP1 axonemal microtubule associated
115.17	chr9	121405094	121406104	10.9328	Intergenic	-36350	111216287	LINC02578	long intergenic non-protein coding RNA 2578
114.652	chr17	44522911	44523910	10.718	Intergenic	-66666	474170	LRRC37A2	leucine rich repeat containing 37 member A2
114.257	chr5	157811701	157812701	42.8684	Intron (NR_109888, Intron 1 of 6)	24580	101927697	LINC02227	long intergenic non-protein coding RNA 2227
114.205	chr10	2255993	2257714	47.2088	Intergenic	100415	399708	LINC00701	long intergenic non-protein coding RNA 701
113.705	chr6	169336813	169337815	10.5984	Intron (NR_136250, Intron 3 of 3)	27163	105378146	LOC105378146	uncharacterized LOC105378146
113.301	chr16	62169557	62170651	28.1615	Intergenic	-99762	1006	CDH8	cadherin 8
113.241	chr3	84930212	84931211	7.73864	Promoter-TSS (NR_147147)	-530	105377192	LINC02025	long intergenic non-protein coding RNA 2025
113.235	chr17	9263657	9264656	6.8225	Intron (NM_004853, Intron 7 of 7)	-181721	101928266	LOC101928266	uncharacterized LOC101928266
113.232	chr8	69901207	69902208	35.2685	Intron (NR_039986, Intron 2 of 4)	114718	100505718	LINC01592	long intergenic non-protein coding RNA 1592
112.991	chr8	67874368	67875375	36.1644	Promoter-TSS (NM_001193502)	-45	100129654	TCF24	transcription factor 24
112.897	chr6	26045036	26046035	17.6687	Promoter-TSS (NM_003531)	-104	8352	HIST1H3C	histone cluster 1 H3 family member c
112.852	chr11	13139390	13140458	25.1756	Intergenic	109061	644943	RASSF10	Ras association domain family member 10
112.803	chr10	84625844	84626996	9.18693	Intron (NR_163253, Intron 6 of 10)	-633744	101929590	NRG3-AS1	NRG3 antisense RNA 1
112.746	chr1	231531147	231532150	45.418	Intron (NM_022051, Intron 1 of 4)	29142	54583	EGLN1	egl-9 family hypoxia inducible factor 1
112.696	chr6	165984440	165985915	20.6677	Intron (NM_001130690, Intron 1 of 21)	90411	10846	PDE10A	phosphodiesterase 10A
112.43	chr11	36398529	36399528	14.7626	Intron (NM_024841, Intron 2 of 9)	1493	79899	PRR5L	proline rich 5 like
112.257	chr18	5527264	5528707	14.6007	Intron (NM_001281534, Intron 1 of 19)	12570	23136	EPB41L3	erythrocyte membrane protein band 4.1 like 3
112.248	chr7	85164220	85165219	63.1285	Intergenic	114281	105375380	LINC00972	long intergenic non-protein coding RNA 972
112.221	chr19	6590451	6591450	13.9902	Exon (NM_001252, Exon 1 of 3)	211	970	CD70	CD70 molecule
111.985	chr3	27235159	27236287	16.9516	Intron (NM_001304384, Intron 4 of 16)	22291	152110	NEK10	NIMA related kinase 10
111.963	chr2	227291938	227292970	20.3568	Intergenic	231055	100847053	MIR5702	microRNA 5702
111.934	chr1	234936604	234937604	21.189	Intergenic	-41301	100130249	PP2672	uncharacterized LOC100130249
111.923	chr20	11881468	11882472	13.4666	Intron (NM_001282550, Intron 1 of 4)	8829	22903	BTBD3	BTB domain containing 3
111.876	chr18	5582419	5583421	28.1194	Intron (NM_001281535, Intron 3 of 21)	-38582	23136	EPB41L3	erythrocyte membrane protein band 4.1 like 3
111.515	chr11	89334099	89335105	12.7763	Intergenic	-11877	50507	NOX4	NADPH oxidase 4
111.227	chr19	41731249	41732249	56.0015	Promoter-TSS (NM_001278599)	-911	558	AXL	AXL receptor tyrosine kinase
111.001	chr7	85034055	85035054	68.205	Intergenic	-15884	105375380	LINC00972	long intergenic non-protein coding RNA 972
110.924	chr2	237550953	237552044	24.5459	Intergenic	73030	57007	ACKR3	atypical chemokine receptor 3
110.829	chr19	8747427	8748426	19.1984	Intergenic	61219	284382	ACTL9	actin like 9
110.732	chr18	7085032	7086036	10.3231	Intron (NM_005559, Intron 1 of 62)	32262	284217	LAMA1	laminin subunit alpha 1
110.457	chr9	36257506	36259027	34.8083	Intron (NM_001128227, Intron 1 of 11)	179	10020	GNE	glucosamine (UDP-N-acetyl)-2-epimerase/N-acetylmannosamine kinase
110.341	chr6	85361753	85362767	15.1605	Intergenic	-36916	102724201	TBX18-AS1	TBX18 antisense RNA 1
110.286	chr10	3149146	3150269	33.1675	Intron (NM_001323071, Intron 9 of 22)	2906	5214	PFKP	phosphofructokinase, platelet
110.228	chr16	49056642	49057657	16.8531	Intergenic	258600	869	CBLN1	cerebellin 1 precursor
109.731	chr1	225611943	225612942	14.8873	Intron (NM_194442, Intron 1 of 13)	3298	3930	LBR	lamin B receptor
109.103	chr13	97980045	97981052	11.2475	Intron (NM_207304, Intron 2 of 6)	-105875	5911	RAP2A	RAP2A, member of RAS oncogene family
108.567	chr21	28148691	28149690	8.49852	Intergenic	68538	9510	ADAMTS1	ADAM metallopeptidase with thrombospondin type 1 motif 1
108.537	chr3	47155208	47156208	15.7751	Intron (NR_146158, Intron 4 of 21)	49759	29072	SETD2	SET domain containing 2, histone lysine methyltransferase
108.204	chr13	80569162	80570161	7.84922	Intergenic	-15551	101515984	LINC01080	long intergenic non-protein coding RNA 1080
108.185	chr1	240408277	240409322	24.829	Intron (NM_001305424, Intron 7 of 18)	153616	56776	FMN2	formin 2
108.173	chrX	68114104	68115773	25.1254	Intergenic	66098	1947	EFNB1	ephrin B1
108.16	chr16	57513297	57514851	17.4082	Promoter-TSS (NM_001369621)	215	55715	DOK4	docking protein 4
108.154	chr10	3023199	3024289	22.3383	Intergenic	85381	101927824	LOC101927824	uncharacterized LOC101927824
108.046	chr7	85208259	85209310	50.2706	Intergenic	158346	105375380	LINC00972	long intergenic non-protein coding RNA 972
107.864	chr14	65757208	65758219	24.3139	Intergenic	44188	100616176	MIR4708	microRNA 4708
107.796	chr12	117302276	117303276	27.8746	Intron (NM_003806, Intron 1 of 1)	16470	8739	HRK	harakiri, BCL2 interacting protein
107.787	chr14	24693518	24694660	19.6863	Intron (NM_006156, Intron 1 of 3)	7484	4738	NEDD8	NEDD8 ubiquitin like modifier
107.749	chr8	59762501	59763506	45.3073	Intron (NM_014729, Intron 4 of 8)	-190591	8439	NSMAF	neutral sphingomyelinase activation associated factor
107.695	chr11	27955215	27956324	39.6589	Intergenic	-122593	693195	MIR610	microRNA 610
107.535	chr7	85093272	85094273	174.877	Intron (NR_134240, Intron 2 of 3)	43334	105375380	LINC00972	long intergenic non-protein coding RNA 972
107.151	chr6	86113042	86115129	49.1234	Non-coding (NR_134633, Exon 2 of 4)	435	101928820	LINC02535	long intergenic non-protein coding RNA 2535
107.105	chr9	26674657	26675656	20.1244	Intergenic	217644	79886	CAAP1	caspase activity and apoptosis inhibitor 1
107.055	chr18	71355892	71356892	14.4502	Intergenic	364216	100505817	LINC02582	long intergenic non-protein coding RNA 2582
106.929	chr11	127391067	127392525	32.8967	Intergenic	250831	101929497	LINC02712	long intergenic non-protein coding RNA 2712
106.784	chr2	105410135	105411145	28.1695	Intergenic	-36463	284998	LINC01114	long intergenic non-protein coding RNA 1114
106.684	chr12	13324456	13325498	17.2943	Intergenic	-24683	2012	EMP1	epithelial membrane protein 1
106.396	chr3	43907718	43908862	37.9947	Intergenic	-175204	55129	ANO10	anoctamin 10
105.907	chr21	30714536	30715549	10.9037	Exon (NM_001186, Exon 5 of 5)	-29779	100874322	BACH1-IT2	BACH1 Intronic transcript 2
105.799	chr6	157469127	157470808	22.2413	Exon (NM_020732, Exon 9 of 20)	112406	57492	ARID1B	AT-rich interaction domain 1B
105.637	chr11	92817950	92818949	9.92554	Intergenic	112143	120103	SLC36A4	solute carrier family 36 member 4
105.425	chr4	97085857	97086889	14.9167	Intergenic	-145481	105377338	LINC02267	long intergenic non-protein coding RNA 2267
105.339	chr4	21014345	21015358	22.2454	Intron (NM_147182, Intron 2 of 8)	-29219	80333	KCNIP4	potassium voltage-gated channel interacting protein 4
105.094	chr9	82224513	82225516	26.4469	Intron (NM_001282760, Intron 5 of 20)	36922	7091	TLE4	TLE family member 4, transcriptional corepressor
105.044	chr19	8744652	8745651	19.7405	Intergenic	63994	284382	ACTL9	actin like 9
104.916	chr8	34770852	34771851	12.7059	Intergenic	129912	103689844	LINC01288	long intergenic non-protein coding RNA 1288
104.805	chr3	159541716	159542721	14.1945	Intron (NM_001197114, Intron 4 of 9)	-15432	29970	SCHIP1	schwannomin interacting protein 1
104.607	chr11	116855015	116856015	18.8381	Intron (NM_025164, Intron 1 of 23)	113629	23387	SIK3	SIK family kinase 3
104.293	chr11	111432491	111433490	15.1979	TTS (NM_001318799)	21757	143903	LAYN	layilin
104.097	chr1	227361436	227362435	9.7398	Intron (NM_001366010, Intron 5 of 34)	144258	8476	CDC42BPA	CDC42 binding protein kinase alpha
103.796	chr9	9639809	9640808	10.791	Intron (NM_002839, Intron 7 of 45)	-159084	105375972	LOC105375972	uncharacterized LOC105375972
103.766	chr10	6198919	6200015	17.992	Intron (NM_001282630, Intron 1 of 14)	-5242	100628560	MIR3155B	microRNA 3155b
103.729	chr22	22862668	22863667	6.84789	Promoter-TSS (NR_130642)	-107	140883	ZNF280B	zinc finger protein 280B
103.569	chr4	35022559	35023568	20.2977	Intergenic	-751694	105374394	LINC02484	long intergenic non-protein coding RNA 2484
103.434	chr1	230213300	230214302	15.0522	Intron (NM_004481, Intron 1 of 15)	10816	2590	GALNT2	polypeptide N-acetylgalactosaminyltransferase 2
103.399	chr1	209848149	209849148	9.71719	Promoter-TSS (NR_134511)	-54	101930114	HSD11B1-AS1	HSD11B1 antisense RNA 1
103.301	chr19	56988389	56990007	23.9306	Promoter-TSS (NM_022103)	-45	100128252	ZNF667-AS1	ZNF667 antisense RNA 1 (head to head)
103.183	chr13	93913750	93915627	22.8845	Intron (NM_005708, Intron 1 of 8)	35628	10082	GPC6	glypican 6
103.117	chr6	81253094	81254182	27.5656	Intergenic	437250	594	BCKDHB	branched chain keto acid dehydrogenase E1 subunit beta
102.81	chr11	83367575	83368579	14.9139	Intron (NM_001142699, Intron 18 of 27)	25391	1740	DLG2	discs large MAGUK scaffold protein 2
102.656	chr16	4588055	4589399	21.6249	Promoter-TSS (NM_013399)	47	29965	CDIP1	cell death inducing p53 target 1
102.583	chr6	56349199	56350198	8.6771	Intron (NM_001144769, Intron 82 of 96)	-90772	81578	COL21A1	collagen type XXI alpha 1 chain
102.302	chr19	53558051	53559050	15.4702	Intergenic	10557	100271846	ERVV-2	endogenous retrovirus group V member 2, envelope
102.235	chr6	78589559	78590975	12.1076	Intron (NM_001282136, Intron 4 of 4)	227511	101928601	MEI4	meiotic double-stranded break formation protein 4
101.867	chr21	17418636	17419990	7.81724	Intergenic	-23495	388815	MIR99AHG	mir-99a-let-7c cluster host gene
101.821	chr21	16388190	16389193	38.0461	Intron (NM_003489, Intron 2 of 3)	48630	8204	NRIP1	nuclear receptor interacting protein 1
101.805	chr18	30122372	30123379	15.1754	Intergenic	31249	441818	WBP11P1	WW domain binding protein 11 pseudogene 1
101.693	chr18	5237335	5238593	23.5505	Promoter-TSS (NR_026849)	64	147525	LINC00526	long intergenic non-protein coding RNA 526
101.693	chrX	45527595	45529018	9.13381	Intergenic	-62271	392452	LOC392452	mitochondrial fission factor pseudogene
101.29	chr3	61437263	61438837	66.2274	Intergenic	-109195	5793	PTPRG	protein tyrosine phosphatase receptor type G
100.905	chr2	147865911	147866956	9.02865	Intergenic	521808	728773	PABPC1P2	poly(A) binding protein cytoplasmic 1 pseudogene 2
100.805	chr7	84937152	84938161	92.3796	Intergenic	-112782	105375380	LINC00972	long intergenic non-protein coding RNA 972
100.686	chr7	84639299	84640301	71.4611	Intron (NM_152754, Intron 15 of 16)	111447	223117	SEMA3D	semaphorin 3D
100.554	chr19	31630726	31631737	45.139	Intergenic	-27185	107985312	LINC01791	long intergenic non-protein coding RNA 1791
100.461	chr20	6646302	6647308	14.5431	Intergenic	69978	105372516	LINC01713	long intergenic non-protein coding RNA 1713
100.428	chr11	58672839	58673864	38.8105	Intron (NM_001354699, Intron 1 of 7)	480	92292	GLYATL1	glycine-N-acyltransferase like 1
100.412	chr19	23737059	23738058	22.9736	Intergenic	132456	171392	ZNF675	zinc finger protein 675
100.283	chr7	84782974	84784269	71.2695	Intergenic	-32374	223117	SEMA3D	semaphorin 3D
100.255	chr8	42318139	42319167	28.5783	Intron (NM_006749, Intron 4 of 10)	40096	6575	SLC20A2	solute carrier family 20 member 2
99.9543	chr13	78492511	78493524	13.84	Promoter-TSS (NM_003991)	-51	1910	EDNRB	endothelin receptor type B
99.839	chr19	38188736	38189896	22.954	Exon (NM_032689, Exon 5 of 5)	-6100	163115	ZNF781	zinc finger protein 781
99.806	chrX	74742565	74743584	15.0614	Promoter-TSS (NM_001146257)	-202	158866	ZDHHC15	zinc finger DHHC-type containing 15
99.674	chr13	74621650	74622673	9.34739	Intron (NM_007249, Intron 1 of 7)	85905	11278	KLF12	Kruppel like factor 12
99.5368	chr9	6498342	6499681	10.1091	Intron (NR_046386, Intron 13 of 16)	85812	115426	UHRF2	ubiquitin like with PHD and ring finger domains 2
99.4267	chr9	16030169	16031203	21.0167	Intergenic	222419	100129385	C9orf92	chromosome 9 open reading frame 92
99.4115	chr8	69836949	69838032	10.1131	Intron (NR_039986, Intron 3 of 4)	178935	100505718	LINC01592	long intergenic non-protein coding RNA 1592
99.3053	chr15	31371418	31372486	22.2813	Intron (NM_001252020, Intron 1 of 26)	-14608	406993	MIR211	microRNA 211
99.2849	chr6	56392802	56393827	43.3288	Intron (NM_001144769, Intron 61 of 96)	114373	667	DST	dystonin
99.1167	chr7	18977612	18978612	15.9787	Intron (NM_001321897, Intron 23 of 25)	179147	7291	TWIST1	twist family bHLH transcription factor 1
99.1157	chr11	12419222	12420221	10.3091	Intron (NM_018222, Intron 1 of 12)	20603	55742	PARVA	parvin alpha
98.9351	chr15	57620043	57621042	12.5056	Intergenic	9206	101928611	LINC01413	long intergenic non-protein coding RNA 1413
98.8916	chr16	61121099	61122107	9.57308	Intergenic	-31933	100616345	MIR4426	microRNA 4426
98.5794	chr11	122041125	122042141	21.2236	Intron (NR_137193, Intron 3 of 4)	9707	399959	MIR100HG	mir-100-let-7a-2-mir-125b-1 cluster host gene
98.473	chrX	139357001	139358006	12.2713	Intergenic	183677	389895	LOC389895	chromosome 16 open reading frame 72-like
98.3872	chr19	22234760	22235764	18.6332	Promoter-TSS (NM_033468)	-24	113835	ZNF257	zinc finger protein 257
97.9319	chr8	74404219	74405218	15.3251	Intron (NM_001164383, Intron 8 of 9)	72409	100128126	STAU2-AS1	STAU2 antisense RNA 1
97.6193	chr9	4106331	4107330	9.17925	Intron (NM_001042413, Intron 4 of 10)	45353	169792	GLIS3	GLIS family zinc finger 3
97.4556	chr19	41729089	41730152	50.2168	Intron (NM_001699, Intron 4 of 18)	-3040	558	AXL	AXL receptor tyrosine kinase
97.4271	chr8	55181159	55182158	12.3698	Intergenic	-61588	26766	RNU105C	RNA, U105C small nucleolar
97.3518	chr6	151361794	151362854	66.6296	Intron (NM_001242768, Intron 26 of 27)	34180	25902	MTHFD1L	methylenetetrahydrofolate dehydrogenase (NADP+ dependent) 1 like
97.3456	chr9	35333225	35334247	8.94797	Intron (NM_006377, Intron 10 of 38)	-8157	#N/A
97.2338	chr8	42072171	42073170	14.6914	Intergenic	-7587	5327	PLAT	plasminogen activator, tissue type
97.1771	chr17	47286230	47288156	33.1447	Promoter-TSS (NM_016428)	-396	51225	ABI3	ABI family member 3
97.0636	chr11	42497395	42498394	10.0978	Intergenic	-222654	100507205	LINC02740	long intergenic non-protein coding RNA 2740
96.8041	chr2	189168058	189169116	18.0689	Intron (NR_045563, Intron 2 of 12)	6368	693146	MIR561	microRNA 561
96.5348	chr4	9946012	9947073	11.0653	Intron (NM_001001290, Intron 6 of 12)	76579	56606	SLC2A9	solute carrier family 2 member 9
96.5131	chr13	91338306	91339305	9.03696	Intergenic	193263	101927224	LINC01049	long intergenic non-protein coding RNA 1049
96.4426	chr9	26264889	26266033	28.273	Intergenic	198788	100506422	LOC100506422	putative deoxyuridine 5'-triphosphate nucleotidohydrolase-like protein FLJ16323
96.1322	chr1	232057423	232058424	30.0889	Intron (NM_001164541, Intron 9 of 9)	-3657	104472714	DISC1-IT1	DISC1 Intronic transcript 1
96.0939	chr7	85021497	85022549	70.3392	Intergenic	-28415	105375380	LINC00972	long intergenic non-protein coding RNA 972
95.9477	chr19	6076421	6077420	14.0194	Intron (NM_000635, Intron 1 of 17)	33591	5990	RFX2	regulatory factor X2
95.7036	chr1	8150138	8151137	12.8513	Intergenic	-64268	54206	ERRFI1	ERBB receptor feedback inhibitor 1
95.6448	chr10	55074365	55075364	4.99748	Intergenic	-543404	4153	MBL2	mannose binding lectin 2
95.5361	chr3	124120390	124121395	9.92417	Intron (NM_001024660, Intron 13 of 59)	27713	102464832	MIR6083	microRNA 6083
95.3702	chr7	85182545	85184276	143.296	Intergenic	132972	105375380	LINC00972	long intergenic non-protein coding RNA 972
95.2685	chr8	55685829	55686828	9.91293	Intergenic	157672	6101	RP1	RP1 axonemal microtubule associated
95.167	chr5	57137153	57138155	19.2134	Intergenic	57335	101928539	LINC02225	long intergenic non-protein coding RNA 2225
94.9727	chr7	24796571	24797627	23.945	Promoter-TSS (NM_001127453)	-16	1687	GSDME	gasdermin E
94.8792	chr4	87959651	87960659	13.6881	Intron (NM_001313960, Intron 1 of 17)	32002	4299	AFF1	AF4/FMR2 family member 1
94.6489	chr10	3782235	3783238	27.5061	Intron (NR_131187, Intron 1 of 1)	44665	1316	KLF6	Kruppel like factor 6
94.5828	chr1	24743202	24744263	53.2564	Intron (NM_001322855, Intron 2 of 12)	1217	57185	NIPAL3	NIPA like domain containing 3
94.5807	chr6	81134503	81135505	28.5207	Intergenic	318616	594	BCKDHB	branched chain keto acid dehydrogenase E1 subunit beta
94.5781	chr9	74121414	74122426	10.0782	Intergenic	-60033	80036	TRPM3	transient receptor potential cation channel subfamily M member 3
94.4803	chr7	64863336	64864335	11.5523	Exon (NM_001287532, Exon 3 of 3)	25067	168374	ZNF92	zinc finger protein 92
94.4027	chr13	96296495	96297494	13.8131	Promoter-TSS (NM_014934)	-34	22873	DZIP1	DAZ interacting zinc finger protein 1
94.3837	chr15	43442447	43443511	12.6547	Intron (NM_024956, Intron 7 of 13)	17195	80021	TMEM62	transmembrane protein 62
94.2093	chr9	33320180	33321606	16.7515	Intron (NM_002504, Intron 9 of 23)	30379	4799	NFX1	nuclear transcription factor, X-box binding 1
94.1573	chr7	84667878	84668877	75.5209	Intron (NM_152754, Intron 9 of 16)	82870	223117	SEMA3D	semaphorin 3D
94.1352	chr7	85009454	85010463	78.0572	Intergenic	-40480	105375380	LINC00972	long intergenic non-protein coding RNA 972
93.9956	chr20	3207843	3208842	12.6526	TTS (NM_001324240)	10031	83959	SLC4A11	solute carrier family 4 member 11
93.9155	chr9	136720672	136721673	27.3709	Intron (NM_001134398, Intron 3 of 29)	-116095	1757	SARDH	sarcosine dehydrogenase
93.8624	chr6	151560884	151561883	9.6216	Intron (NM_005100, Intron 1 of 4)	281	9590	AKAP12	A-kinase anchoring protein 12
93.8086	chr7	85015451	85016452	72.743	Intergenic	-34487	105375380	LINC00972	long intergenic non-protein coding RNA 972
93.7611	chr6	86168133	86169568	38.6544	Intron (NM_002526, Intron 1 of 8)	9049	4907	NT5E	5'-nucleotidase ecto
93.3484	chr11	22413679	22414678	4.87873	Intergenic	54251	57084	SLC17A6	solute carrier family 17 member 6
93.2468	chr9	137494059	137495134	26.3289	Intergenic	-39055	1289	COL5A1	collagen type V alpha 1 chain
93.1794	chr4	90042901	90043901	13.5844	Intergenic	9433	166815	TIGD2	tigger transposable element derived 2
93.1596	chr6	90049077	90050076	12.4485	Intron (NM_016021, Intron 3 of 7)	12865	51465	UBE2J1	ubiquitin conjugating enzyme E2 J1
92.9594	chr1	56184238	56185249	28.2363	Intergenic	225893	105378739	LINC01753	long intergenic non-protein coding RNA 1753
92.9399	chr6	65892235	65893243	8.6657	Intron (NM_001292009, Intron 12 of 43)	-118572	441155	LOC441155	zinc finger CCCH-type domain-containing-like
92.9385	chr8	54426493	54427538	100.907	Non-coding (NR_149032, Exon 2 of 2)	9510	100507516	LOC100507516	uncharacterized LOC100507516
92.5414	chr4	142421902	142422904	14.6229	Intergenic	-135333	3600	IL15	interleukin 15
92.4898	chr9	124160306	124161308	18.2362	Intergenic	-28225	2040	STOM	stomatin
92.4073	chr7	84650107	84651144	57.0322	Intron (NM_152754, Intron 11 of 16)	100622	223117	SEMA3D	semaphorin 3D
92.199	chr6	81317508	81318526	20.7522	Intergenic	501629	594	BCKDHB	branched chain keto acid dehydrogenase E1 subunit beta
91.9448	chr3	50105254	50106258	13.1418	Intron (NR_146071, Intron 12 of 15)	-20596	10181	RBM5	RNA binding motif protein 5
91.8351	chr6	83664984	83665985	41.378	Intron (NR_146807, Intron 10 of 10)	110076	90025	UBE3D	ubiquitin protein ligase E3D
91.7518	chr6	72311881	72312991	25.031	Intergenic	181706	102724000	LINC01626	long intergenic non-protein coding RNA 1626
91.7208	chr9	23850630	23851637	18.9642	Promoter-TSS (NM_001351456)	-534	1993	ELAVL2	ELAV like RNA binding protein 2
91.6993	chr14	36647442	36648445	22.1191	Intergenic	-2086	100886964	PTCSC3	papillary thyroid carcinoma susceptibility candidate 3
91.655	chr9	33506210	33507209	28.1931	Intron (NR_003667, Intron 4 of 6)	4455	441394	SUGT1P1	SUGT1 pseudogene 1
91.5506	chr7	85202585	85203584	61.2246	Intergenic	152646	105375380	LINC00972	long intergenic non-protein coding RNA 972
91.4101	chr6	72188198	72189204	17.954	Intergenic	57971	102724000	LINC01626	long intergenic non-protein coding RNA 1626
91.1952	chr13	98735374	98736542	19.7971	Intergenic	-58885	10160	FARP1	FERM, ARH/RhoGEF and pleckstrin domain protein 1
90.9443	chr1	224811161	224812167	14.4537	Intron (NR_136287, Intron 1 of 4)	7645	149111	CNIH3	cornichon family AMPA receptor auxiliary protein 3
90.8087	chr18	5534562	5535566	12.518	Intron (NM_001281534, Intron 1 of 19)	5491	23136	EPB41L3	erythrocyte membrane protein band 4.1 like 3
90.7094	chr12	118423833	118425189	44.863	Intergenic	-17716	283455	KSR2	kinase suppressor of ras 2
90.6594	chr10	77289677	77290750	24.2434	Intron (NM_001305581, Intron 2 of 6)	-22003	693191	MIR606	microRNA 606
90.5988	chr11	104493919	104494918	9.33776	Intergenic	-14388	102723895	LINC02552	long intergenic non-protein coding RNA 2552
90.5975	chr8	64144011	64145015	45.6153	Intergenic	62951	253943	YTHDF3	YTH N6-methyladenosine RNA binding protein 3
90.543	chr17	47224031	47225036	22.5494	Intron (NM_001159388, Intron 3 of 10)	14402	124872	B4GALNT2	beta-1,4-N-acetyl-galactosaminyltransferase 2
90.3178	chr11	128205675	128206759	17.6318	Intergenic	127556	105369564	LINC02098	long intergenic non-protein coding RNA 2098
90.3099	chr3	923944	924962	12.958	Intergenic	-210255	27255	CNTN6	contactin 6
90.1686	chr4	73496703	73497702	10.5188	Intergenic	-62264	9508	ADAMTS3	ADAM metallopeptidase with thrombospondin type 1 motif 3
90.1497	chr16	59626886	59627891	13.5749	Intergenic	161707	644649	APOOP5	apolipoprotein O pseudogene 5
90.0164	chr21	28942215	28943317	34.9372	Intergenic	-151932	54088	LINC00113	long intergenic non-protein coding RNA 113
90.0083	chr3	61560107	61561163	42.6297	Intron (NM_002841, Intron 1 of 29)	13390	5793	PTPRG	protein tyrosine phosphatase receptor type G
89.842	chrX	45338758	45339835	19.1391	Intergenic	-25337	101927528	LINC01204	long intergenic non-protein coding RNA 1204
89.7795	chr8	32122062	32123061	10.2764	Intron (NM_013962, Intron 1 of 4)	-175701	100874286	NRG1-IT3	NRG1 Intronic transcript 3
89.7326	chr7	85243656	85244720	63.1985	Intergenic	193750	105375380	LINC00972	long intergenic non-protein coding RNA 972
89.7313	chr14	25025688	25026687	9.34274	Intergenic	19269	1511	CTSG	cathepsin G
89.6926	chr12	9892044	9893053	20.0383	Intergenic	-6653	160365	CLECL1	C-type lectin like 1
89.4554	chrX	67912911	67913964	20.3446	Promoter-TSS (NM_001142504)	-44	9754	STARD8	StAR related lipid transfer domain containing 8
89.3867	chr7	55034763	55035780	12.8395	Intergenic	-51439	1956	EGFR	epidermal growth factor receptor
89.2902	chr16	48047147	48048151	35.1943	Intergenic	48049	105371238	LINC02134	long intergenic non-protein coding RNA 2134
89.2863	chr8	67038595	67039779	24.6633	Promoter-TSS (NM_184087)	-177	84675	TRIM55	tripartite motif containing 55
89.1528	chr10	3468096	3469095	16.7269	Intron (NR_131187, Intron 1 of 1)	76435	101927880	LINC02669	long intergenic non-protein coding RNA 2669
89.1274	chr11	128044098	128045099	11.1163	Intergenic	-34063	105369564	LINC02098	long intergenic non-protein coding RNA 2098
88.9942	chr8	82738031	82739051	17.3199	Intron (NM_152837, Intron 2 of 6)	15879	64089	SNX16	sorting nexin 16
88.9153	chr19	29451998	29452997	12.9783	Intergenic	-3541	148145	LINC00906	long intergenic non-protein coding RNA 906
88.8105	chr8	116067817	116069185	25.714	Intergenic	611739	7227	TRPS1	transcriptional repressor GATA binding 1
88.7629	chr1	67416874	67417928	13.4979	Intron (NM_001350530, Intron 6 of 15)	21462	57708	MIER1	MIER1 transcriptional regulator
88.7151	chr5	151124484	151125493	37.94	Intron (NM_004045, Intron 3 of 3)	13204	475	ATOX1	antioxidant 1 copper chaperone
88.6915	chr4	77905737	77906741	18.4594	Intron (NM_018243, Intron 1 of 9)	35334	55752	SEPTIN11	septin 11
88.6226	chr4	22180428	22181435	16.0577	Intergenic	160358	100505912	LOC100505912	uncharacterized LOC100505912
88.4884	chr12	60088779	60089805	9.01153	Intron (NR_073055, Intron 1 of 6)	6141	9194	SLC16A7	solute carrier family 16 member 7
88.4554	chr1	53611625	53612625	21.221	Intergenic	-3815	6512	SLC1A7	solute carrier family 1 member 7
88.3644	chr21	20204968	20205978	6.07907	Intergenic	-73343	101927797	MIR548XHG	MIR548X host gene
88.3478	chr12	1023223	1024230	41.9613	Intron (NM_001297421, Intron 7 of 9)	18516	5893	RAD52	RAD52 homolog, DNA repair protein
88.3121	chr12	10357401	10358487	7.929	Intergenic	-7532	23710	GABARAPL1	GABA type A receptor associated protein like 1
88.2962	chr11	22488034	22489093	12.1443	Intron (NR_120583, Intron 3 of 3)	25002	102723378	LINC01495	long intergenic non-protein coding RNA 1495
88.2922	chr20	6547118	6548117	8.41301	Intergenic	140238	101929244	CASC20	cancer susceptibility 20
88.1218	chr6	90057815	90058817	29.5356	Intron (NM_016021, Intron 1 of 7)	4125	51465	UBE2J1	ubiquitin conjugating enzyme E2 J1
88.0619	chr2	160760767	160761778	13.5222	Promoter-TSS (NM_001198759)	-5	100526664	LY75-CD302	LY75-CD302 readthrough
88.0523	chr18	4433464	4434478	9.03433	Intron (NM_001242761, Intron 1 of 11)	21295	9229	DLGAP1	DLG associated protein 1
88.0103	chr18	7920931	7922024	12.6034	Intron (NM_001105244, Intron 4 of 32)	354163	5797	PTPRM	protein tyrosine phosphatase receptor type M
87.9001	chr17	1971126	1972537	35.4952	Intron (NM_017575, Intron 16 of 18)	12227	3090	HIC1	HIC ZBTB transcriptional repressor 1
87.8878	chr8	119646114	119648016	33.7727	Intron (NR_038210, Intron 2 of 4)	-12863	401474	SAMD12	sterile alpha motif domain containing 12
87.8783	chr4	183110361	183111360	8.27258	Intergenic	20414	100302270	MIR1305	microRNA 1305
87.8507	chr2	67663047	67664192	15.1999	Intergenic	39154	54465	ETAA1	ETAA1 activator of ATR kinase
87.7201	chr10	79497010	79498136	8.10617	Intergenic	-100007	3778	KCNMA1	potassium calcium-activated channel subfamily M alpha 1
87.7145	chr11	29794858	29795989	20.3589	Intergenic	155074	105376606	LINC02546	long intergenic non-protein coding RNA 2546
87.5112	chr1	233809408	233810464	16.4543	Intergenic	50038	100616390	MIR4427	microRNA 4427
87.3622	chr8	35482115	35483114	9.09878	Intron (NM_001322818, Intron 4 of 16)	80704	137970	UNC5D	unc-5 netrin receptor D
87.3456	chr2	240196531	240197534	17.2156	Intron (NM_006037, Intron 2 of 26)	-30125	100423043	MIR4269	microRNA 4269
87.1729	chr3	60921082	60922087	20.7775	Intron (NR_148922, Intron 3 of 3)	315542	2272	FHIT	fragile histidine triad diadenosine triphosphatase
87.0292	chr5	73233839	73235116	11.6509	Intron (NM_001080479, Intron 36 of 36)	125106	64283	ARHGEF28	Rho guanine nucleotide exchange factor 28
87.0204	chr2	107724728	107725753	14.734	Intergenic	-221675	84620	ST6GAL2	ST6 beta-galactoside alpha-2,6-sialyltransferase 2
86.9504	chr8	67368079	67369120	13.037	Intron (NM_144650, Intron 10 of 13)	23860	137872	ADHFE1	alcohol dehydrogenase iron containing 1
86.8622	chrX	36449542	36450619	8.39267	Intron (NR_110412, Intron 2 of 7)	8295	101928627	LOC101928627	uncharacterized LOC101928627
86.8281	chr15	60120851	60121850	18.1466	Intergenic	-139831	663	BNIP2	BCL2 interacting protein 2
86.8097	chr18	6740993	6741992	8.17311	Intron (NM_001366231, Intron 1 of 16)	-11631	101927168	LOC101927168	uncharacterized LOC101927168
86.6515	chr11	111428149	111429270	24.1676	Intron (NM_178834, Intron 6 of 6)	17476	143903	LAYN	layilin
86.6273	chr3	64962666	64963732	23.186	Intron (NR_038264, Intron 4 of 5)	-289523	56999	ADAMTS9	ADAM metallopeptidase with thrombospondin type 1 motif 9
86.5502	chr19	30456177	30457742	34.7988	Intron (NR_045557, Intron 1 of 9)	23813	8725	URI1	URI1 prefoldin like chaperone
86.4323	chr1	236162430	236163429	11.7039	Intron (NM_002508, Intron 12 of 19)	65461	4811	NID1	nidogen 1
86.4273	chr7	88030029	88031449	225.659	Intergenic	-94530	79689	STEAP4	STEAP4 metalloreductase
86.3976	chr5	148293381	148294398	43.2178	Intergenic	87733	154	ADRB2	adrenoceptor beta 2
86.3303	chr2	228740293	228741299	21.8475	Intron (NM_178821, Intron 1 of 12)	4449	164781	DAW1	dynein assembly factor with WD repeats 1
86.2584	chr2	224966504	224967562	11.7653	Intergenic	-62997	5270	SERPINE2	serpin family E member 2
86.2218	chr5	57119544	57120569	14.3008	Intergenic	74933	101928539	LINC02225	long intergenic non-protein coding RNA 2225
86.1393	chrX	53213709	53214708	7.53721	Intron (NR_148673, Intron 25 of 26)	10462	102465539	MIR6895	microRNA 6895
85.9932	chr8	143780839	143781874	85.8721	Promoter-TSS (NM_001160354)	-173	54742	LY6K	lymphocyte antigen 6 family member K
85.8467	chr5	30279015	30280014	7.18531	Intergenic	398847	105374704	LOC105374704	uncharacterized LOC105374704
85.8096	chr12	21226403	21227457	24.3464	Intron (NM_001371097, Intron 14 of 15)	-57198	10599	SLCO1B1	solute carrier organic anion transporter family member 1B1
85.7366	chr9	16031634	16032633	15.7639	Intergenic	220972	100129385	C9orf92	chromosome 9 open reading frame 92
85.6888	chr7	87081256	87082260	136.073	Intron (NM_000443, Intron 6 of 27)	23238	5244	ABCB4	ATP binding cassette subfamily B member 4
85.6068	chr9	81835704	81836707	18.1532	Intergenic	-75624	101927450	LOC101927450	uncharacterized LOC101927450
85.4801	chr1	101595913	101596961	17.8733	Intergenic	105035	102606465	LOC102606465	uncharacterized LOC102606465
85.4692	chr15	26020294	26021386	22.336	Intron (NM_024490, Intron 2 of 20)	73132	100616474	MIR4715	microRNA 4715
85.4075	chr16	56423127	56424133	25.6965	Intron (NM_001144, Intron 8 of 13)	35271	267	AMFR	autocrine motility factor receptor
85.2891	chr6	71957787	71958862	23.5697	Intergenic	-40190	79627	OGFRL1	opioid growth factor receptor like 1
85.2581	chr9	77398036	77399037	10.0158	Intron (NM_001177311, Intron 21 of 38)	103727	140803	TRPM6	transient receptor potential cation channel subfamily M member 6
85.21	chr16	64897795	64898801	21.2492	Intergenic	257668	1009	CDH11	cadherin 11
85.139	chr16	63011410	63012424	16.2104	Intergenic	-941575	1006	CDH8	cadherin 8
85.1239	chr11	35644869	35645900	17.7209	Intergenic	5376	24147	FJX1	four-jointed box kinase 1
85.0174	chr3	66130141	66131199	15.055	Intron (NM_173471, Intron 1 of 10)	11385	115286	SLC25A26	solute carrier family 25 member 26
84.9794	chr7	139366454	139367810	78.4389	Intron (NM_001113239, Intron 2 of 14)	110665	28996	HIPK2	homeodomain interacting protein kinase 2
84.9172	chr17	13249248	13251445	25.6789	Intergenic	-40269	105371541	LINC02093	long intergenic non-protein coding RNA 2093
84.813	chr16	13203563	13204567	38.7215	Intron (NM_001145204, Intron 2 of 4)	208610	729993	SHISA9	shisa family member 9
84.7845	chr17	34763585	34764584	8.85257	Intron (NM_032258, Intron 13 of 13).2	-7077	729877	TBC1D3H	TBC1 domain family member 3H
84.7191	chr11	95920588	95922101	25.0982	Intron (NM_032427, Intron 1 of 4)	-153258	100422991	MIR1260B	microRNA 1260b
84.5353	chr11	7986500	7987602	27.2956	Intergenic	-1830	338322	NLRP10	NLR family pyrin domain containing 10
84.3341	chr21	30630654	30631955	12.8228	Intron (NR_027072, Intron 1 of 1)	-39939	571	BACH1	BTB domain and CNC homolog 1
84.2873	chr10	3542221	3543389	14.3196	Intron (NR_155745, Intron 1 of 3)	2225	101927880	LINC02669	long intergenic non-protein coding RNA 2669
84.2632	chr15	38169792	38170791	7.02374	Intergenic	-56517	145942	TMCO5A	transmembrane and coiled-coil domains 5A
84.1346	chr1	238226460	238227472	18.2393	Intergenic	-172744	57829	ZP4	zona pellucida glycoprotein 4
84.0776	chr4	67430199	67431198	9.59056	Intergenic	288156	100302177	MIR1269A	microRNA 1269a
84.0545	chr17	51799474	51800480	17.4325	Intergenic	-100311	84643	KIF2B	kinesin family member 2B
83.9976	chr11	57405264	57406279	26.4941	Intergenic	-2900	406919	MIR130A	microRNA 130a
83.962	chr2	235732191	235733190	9.19182	Intergenic	-127971	23677	SH3BP4	SH3 domain binding protein 4
83.8525	chr4	82552884	82554704	22.6013	Intergenic	-160733	153020	RASGEF1B	RasGEF domain family member 1B
83.8082	chr5	103632490	103633494	8.72719	Intergenic	-734502	83594	NUDT12	nudix hydrolase 12
83.7658	chr4	5639735	5640777	21.6984	Intron (NM_001166136, Intron 10 of 21)	70030	132884	EVC2	EvC ciliary complex subunit 2
83.7339	chr19	28500239	28501257	16.0119	Intron (NR_146733, Intron 5 of 6)	-215900	148189	LINC00662	long intergenic non-protein coding RNA 662
83.7176	chr7	88025201	88026230	73.9806	Intergenic	-89506	79689	STEAP4	STEAP4 metalloreductase
83.6352	chr3	59312675	59313724	36.2386	Intergenic	-277441	200844	C3orf67	chromosome 3 open reading frame 67
83.5661	chr9	81226223	81228596	23.7909	Intergenic	315368	29968	PSAT1	phosphoserine aminotransferase 1
83.435	chr14	52535303	52536307	23.8986	Promoter-TSS (NM_007361)	-28	22795	NID2	nidogen 2
83.4072	chr8	1942023	1943040	39.2887	Intron (NM_014867, Intron 1 of 1)	20688	9920	KBTBD11	kelch repeat and BTB domain containing 11
83.3254	chr1	66682398	66683467	8.15037	Intron (NM_001037340, Intron 1 of 14)	-114859	5142	PDE4B	phosphodiesterase 4B
83.3152	chr6	103392111	103393110	4.34103	Intergenic	1545749	2898	GRIK2	glutamate ionotropic receptor kainate type subunit 2
83.2007	chr3	116192120	116193119	8.70799	Intergenic	-28285	4045	LSAMP	limbic system associated membrane protein
83.1306	chr9	32430935	32431934	8.92409	Intron (NM_002197, Intron 14 of 20)	46793	48	ACO1	aconitase 1
82.9633	chr18	5899973	5900977	16.3828	Intergenic	-4522	645369	TMEM200C	transmembrane protein 200C
82.8773	chr11	90480092	90481091	7.86171	Intron (NR_104190, Intron 3 of 6)	121779	100302228	MIR1261	microRNA 1261
82.6965	chr19	34558545	34559583	11.6308	Intergenic	-104345	26065	LSM14A	LSM14A mRNA processing body assembly factor
82.6496	chr16	64462075	64463098	7.57048	Intergenic	693380	1009	CDH11	cadherin 11
82.6485	chr6	91500017	91501016	12.0738	Intergenic	-203725	6885	MAP3K7	mitogen-activated protein kinase kinase kinase 7
82.3872	chr7	84743357	84745101	195.011	Intron (NM_152754, Intron 1 of 16)	7018	223117	SEMA3D	semaphorin 3D
82.3829	chr8	38254613	38255614	28.3632	Intron (NM_001199660, Intron 4 of 10)	10464	137994	LETM2	leucine zipper and EF-hand containing transmembrane protein 2
82.21	chr1	223403583	223404582	33.5541	Intron (NM_017982, Intron 5 of 8)	-87492	7100	TLR5	toll like receptor 5
82.1321	chr7	84853169	84854168	73.7596	Intergenic	-102421	223117	SEMA3D	semaphorin 3D
82.1123	chr8	67419434	67420499	23.2768	Intron (NM_152765, Intron 3 of 5)	14165	254778	VXN	vexin
81.9925	chr6	148552415	148553446	10.7651	Intergenic	-40534	23328	SASH1	SAM and SH3 domain containing 1
81.9606	chr13	78766547	78767546	9.69511	Intron (NR_047001, Intron 2 of 5)	138056	100874222	OBI1-AS1	OBI1 antisense RNA 1
81.9306	chr9	18268077	18269111	8.25072	Intergenic	-205557	92949	ADAMTSL1	ADAMTS like 1
81.9188	chr9	82225618	82226618	18.7135	Intron (NM_001282760, Intron 5 of 20)	38026	7091	TLE4	TLE family member 4, transcriptional corepressor
81.797	chr14	87265175	87266251	15.0752	Intergenic	-106409	283585	LINC01148	long intergenic non-protein coding RNA 1148
81.7939	chr19	38489758	38490774	50.6881	Intron (NM_015073, Intron 1 of 21)	92418	23094	SIPA1L3	signal induced proliferation associated 1 like 3
81.7616	chr4	23791068	23792067	8.55917	Intergenic	91348	10891	PPARGC1A	PPARG coactivator 1 alpha
81.7358	chr6	72178467	72179743	24.0723	Intergenic	48375	102724000	LINC01626	long intergenic non-protein coding RNA 1626
81.7178	chr10	17270102	17271126	32.5132	Intron (NM_003380, Intron 1 of 9)	374	7431	VIM	vimentin
81.5852	chr15	100345820	100347680	21.5047	Promoter-TSS (NR_135737)	382	196968	DNM1P46	dynamin 1 pseudogene 46
81.5736	chr3	52704515	52705518	51.7816	Intron (NM_001366075, Intron 4 of 30)	14599	55193	PBRM1	polybromo 1
81.558	chr1	157972479	157973511	30.9684	Intron (NM_001286349, Intron 1 of 12)	9560	55243	KIRREL1	kirre like nephrin family adhesion molecule 1
81.4811	chr17	54263425	54264464	19.5039	Intron (NM_001365758, Intron 2 of 20)	33108	162282	ANKFN1	ankyrin repeat and fibronectin type III domain containing 1
81.4595	chr2	59616147	59617146	7.64188	Intergenic	171803	101927285	LINC01793	long intergenic non-protein coding RNA 1793
81.3558	chr8	54330982	54332061	25.994	Intergenic	105004	100507516	LOC100507516	uncharacterized LOC100507516
81.2331	chr8	141655577	141656577	66.3836	Intergenic	-10345	27161	AGO2	argonaute RISC catalytic component 2
81.2328	chr1	235116125	235117129	26.3913	Intergenic	-16881	101927851	LOC101927851	uncharacterized LOC101927851
81.1745	chr11	113488698	113489697	11.8647	Intergenic	87833	80975	TMPRSS5	transmembrane serine protease 5
81.1708	chr11	96688062	96689162	33.1059	Intergenic	447023	105369443	LINC02737	long intergenic non-protein coding RNA 2737
80.9468	chr10	50594729	50595819	15.4637	Intron (NM_001276451, Intron 4 of 6)	8861	644168	DRGX	dorsal root ganglia homeobox
80.927	chr3	190251015	190252044	18.8736	Intron (NM_001364879, Intron 1 of 10)	19655	3556	IL1RAP	interleukin 1 receptor accessory protein
80.9086	chr19	56894958	56896352	16.9789	Exon (NM_001320371, Exon 5 of 5)	9248	147948	ZNF582	zinc finger protein 582
80.8906	chr6	20495139	20496162	11.611	Intergenic	-39038	54901	CDKAL1	CDK5 regulatory subunit associated protein 1 like 1
80.8777	chr11	86382677	86383683	22.3733	Promoter-TSS (NR_147831)	60	10873	ME3	malic enzyme 3
80.87	chrX	110029407	110030428	6.62775	Intron (NR_159734, Intron 2 of 12)	9128	91851	CHRDL1	chordin like 1
80.8484	chr10	65136343	65137345	12.5202	Intron (NM_001318154, Intron 2 of 25)	-4036	100302150	MIR1296	microRNA 1296
80.7607	chr5	139677571	139678570	15.9961	Intron (NM_002622, Intron 2 of 3)	4616	5201	PFDN1	prefoldin subunit 1
80.5883	chr11	36795884	36797398	18.3553	Intergenic	-176812	5897	RAG2	recombination activating 2
80.551	chr1	40480522	40481526	11.7488	Intergenic	-24713	10487	CAP1	cyclase associated actin cytoskeleton regulatory protein 1
80.5454	chr7	84276775	84277797	18.0899	Intergenic	115494	101927378	LOC101927378	uncharacterized LOC101927378
80.5152	chr12	8814955	8815968	21.0992	Promoter-TSS (NR_123733)	-39	8076	MFAP5	microfibril associated protein 5
80.4996	chr8	118681623	118682622	11.5472	Intergenic	149170	90390	MED30	mediator complex subunit 30
80.4624	chr7	88168536	88169535	78.2685	Intergenic	-219979	219578	ZNF804B	zinc finger protein 804B
80.2337	chr19	57078392	57079492	30.4393	5' UTR (NM_001001668, Exon 1 of 6)	105	388566	ZNF470	zinc finger protein 470
80.1771	chr7	85052554	85053553	103.799	Intron (NR_134240, Intron 1 of 3)	2615	105375380	LINC00972	long intergenic non-protein coding RNA 972
80.1002	chr11	126242868	126244194	20.8167	Intron (NM_001348397, Intron 2 of 11)	17624	6484	ST3GAL4	ST3 beta-galactoside alpha-2,3-sialyltransferase 4
79.9726	chr11	123043709	123044716	22.366	Intron (NM_024769, Intron 1 of 6)	21744	79827	CLMP	CXADR like membrane protein
79.807	chr8	71522164	71523163	26.5018	Intron (NR_038881, Intron 1 of 3)	1851	286190	LACTB2-AS1	LACTB2 antisense RNA 1
79.7946	chrX	73323854	73325229	10.2785	Intron (NR_028379, Intron 5 of 6)	113755	693122	MIR421	microRNA 421
79.7891	chrX	45568946	45569945	15.8422	Intergenic	-21132	392452	LOC392452	mitochondrial fission factor pseudogene
79.6796	chr4	8395031	8396041	9.11964	Intron (NM_001101667, Intron 10 of 16)	46914	8310	ACOX3	acyl-CoA oxidase 3, pristanoyl
79.6412	chr8	80298152	80299178	24.1298	Intergenic	54242	113219456	MIR12123	microRNA 12123
79.5969	chr11	116428911	116429939	25.7965	Intergenic	-80714	101929011	LINC02702	long intergenic non-protein coding RNA 2702
79.5565	chr12	89769313	89770318	24.7044	Intergenic	-23537	1848	DUSP6	dual specificity phosphatase 6
79.5413	chr2	227290840	227291903	19.5374	Intergenic	232138	100847053	MIR5702	microRNA 5702
79.4507	chr17	33814900	33815942	16.8528	Promoter-TSS (NM_001195790)	-663	100506736	SLFN12L	schlafen family member 12 like
79.4381	chr17	61926125	61927125	24.24	Intergenic	-6580	6603	SMARCD2	SWI/SNF related, matrix associated, actin dependent regulator of chromatin, subfamily d, member 2
79.2937	chr1	225887617	225888643	22.0062	Intergenic	-47305	55740	ENAH	ENAH actin regulator
79.2725	chr4	120108827	120109832	8.25223	TTS (NM_016599)	-24453	54532	USP53	ubiquitin specific peptidase 53
79.2441	chr20	61371223	61372281	26.5793	Intron (NM_002531, Intron 1 of 3)	31564	4923	NTSR1	neurotensin receptor 1
79.1283	chr1	17215531	17216558	26.9227	Promoter-TSS (NR_135056)	-71	105376805	LOC105376805	uncharacterized LOC105376805
79.1118	chr21	43460209	43461220	38.5499	Intergenic	18336	150142	ZNF295-AS1	ZNF295 antisense RNA 1
79.0656	chr4	74974449	74975962	33.272	Intergenic	-10293	2920	CXCL2	C-X-C motif chemokine ligand 2
78.8696	chr4	150474986	150475988	10.4689	Intron (NM_001363507, Intron 10 of 13)	261508	285423	IQCM	IQ motif containing M
78.7694	chr1	98676634	98677708	14.8029	Intron (NR_046088, Intron 1 of 2)	904	729987	LINC01776	long intergenic non-protein coding RNA 1776
78.6851	chr8	75367543	75368542	10.7133	Intron (NM_001362931, Intron 5 of 5)	-92736	100847058	MIR5681A	microRNA 5681a
78.6358	chr9	23117309	23118333	10.4003	Intergenic	471622	441389	LINC01239	long intergenic non-protein coding RNA 1239
78.5942	chr2	239869776	239870791	14.5835	Intergenic	-22318	401039	LINC01940	long intergenic non-protein coding RNA 1940
78.5895	chr8	131275644	131276734	65.1065	Intron (NM_018482, Intron 3 of 29)	32590	29065	ASAP1-IT1	ASAP1 Intronic transcript 1
78.4274	chr11	19950360	19951359	8.17876	Intron (NM_001244963, Intron 7 of 39)	-93243	89797	NAV2	neuron navigator 2
78.3874	chr7	19597874	19598873	8.21021	Intergenic	146686	100422967	MIR3146	microRNA 3146
78.33	chr2	145764468	145765476	29.9864	Intron (NR_033870, Intron 3 of 4)	339438	401014	TEX41	testis expressed 41
78.2503	chr21	45425768	45426767	11.9894	Intergenic	-5923	7109	TRAPPC10	trafficking protein particle complex 10
78.1434	chr11	126032626	126033625	51.2552	Intergenic	48420	84881	RPUSD4	RNA pseudouridine synthase D4
77.9654	chr2	118730010	118731047	23.201	Intron (NM_019044, Intron 11 of 23)	41118	54520	CCDC93	coiled-coil domain containing 93
77.9401	chr5	148289873	148291016	57.3809	Intergenic	84288	154	ADRB2	adrenoceptor beta 2
77.9085	chr9	20731674	20732733	12.2668	Intron (NM_017794, Intron 6 of 45)	16099	574444	MIR491	microRNA 491
77.9064	chr9	38499849	38500848	8.12511	Intergenic	45021	100289137	FAM95C	family with sequence similarity 95 member C
77.902	chr1	241520074	241521079	10.5042	Promoter-TSS (NM_002924)	-46	6000	RGS7	regulator of G protein signaling 7
77.8864	chr3	120499521	120500535	11.2181	Exon (NM_005513, Exon 5 of 5)	38437	2960	GTF2E1	general transcription factor IIE subunit 1
77.8536	chrX	43871533	43872532	8.155	Intergenic	-39396	4693	NDP	norrin cystine knot growth factor NDP
77.7839	chr9	109561183	109562182	5.59763	Intergenic	-63765	58499	ZNF462	zinc finger protein 462
77.7834	chr9	33946433	33947471	21.112	Intron (NR_163243, Intron 9 of 24)	5900	100113379	SNORD121A	small nucleolar RNA, C/D box 121A
77.7809	chr8	145747325	145748348	44.954	TTS (NM_001024678)	4460	9684	LRRC14	leucine rich repeat containing 14
77.737	chr6	710458	711462	14.5528	Intergenic	-17819	55770	EXOC2	exocyst complex component 2
77.7277	chr4	102711575	102712599	16.6277	Exon (NM_017935, Exon 1 of 17)	200	55024	BANK1	B cell scaffold protein with ankyrin repeats 1
77.7205	chr18	6055395	6056396	17.6773	Intron (NM_173464, Intron 16 of 19)	-159942	645369	TMEM200C	transmembrane protein 200C
77.7145	chr8	49502334	49503394	27.8983	Intron (NR_105002, Intron 2 of 3)	-30099	101929217	LOC101929217	uncharacterized LOC101929217
77.7056	chr16	64623415	64624419	11.3038	Intergenic	532049	1009	CDH11	cadherin 11
77.6625	chr9	5509242	5510360	25.3163	Promoter-TSS (NM_025239)	-730	80380	PDCD1LG2	programmed cell death 1 ligand 2
77.559	chr2	216393035	216394034	9.18072	Intergenic	75104	102724849	LOC102724849	uncharacterized LOC102724849
77.5176	chr21	46334492	46335577	16.424	Intron (NM_001127491, Intron 1 of 15)	5780	3689	ITGB2	integrin subunit beta 2
77.4682	chr1	121260892	121261912	18.2327	Intron (NR_003955, Intron 1 of 7)	492	647121	EMBP1	embigin pseudogene 1
77.4224	chr6	70627445	70629322	19.8153	Intron (NM_001858, Intron 4 of 50)	51935	1310	COL19A1	collagen type XIX alpha 1 chain
77.3829	chr19	36673193	36674283	62.0144	Exon (NM_001366188, Exon 5 of 5)	-30389	1346	COX7A1	cytochrome c oxidase subunit 7A1
77.1008	chr4	108722521	108723759	14.9939	Intergenic	-22581	166929	SGMS2	sphingomyelin synthase 2
77.0516	chr7	41955759	41956762	23.3613	Intergenic	-213572	3624	INHBA	inhibin subunit beta A
76.9761	chr6	69729389	69730388	8.02931	Intron (NM_001704, Intron 13 of 31)	384714	577	ADGRB3	adhesion G protein-coupled receptor B3
76.9668	chr5	135342142	135343151	37.8903	Intergenic	-22031	7045	TGFBI	transforming growth factor beta induced
76.9261	chr11	113503416	113504415	8.02417	Intergenic	73115	80975	TMPRSS5	transmembrane serine protease 5
76.8462	chr7	84659836	84660837	196.191	Intron (NM_152754, Intron 10 of 16)	90911	223117	SEMA3D	semaphorin 3D
76.8255	chr2	237779975	237780985	16.8958	Intergenic	184330	93463	LOC93463	uncharacterized LOC93463
76.7984	chr11	111410870	111411872	25.6784	5' UTR (NM_001258391, Exon 1 of 6)	138	143903	LAYN	layilin
76.785	chr6	99460528	99461531	25.2098	Intergenic	-65147	26235	FBXL4	F-box and leucine rich repeat protein 4
76.7226	chr8	118097189	118098202	19.0214	Intron (NM_001172815, Intron 2 of 10)	-49539	169026	SLC30A8	solute carrier family 30 member 8
76.6741	chr16	64125885	64126884	7.19841	Intergenic	1029582	1009	CDH11	cadherin 11
76.5006	chr20	2217472	2218474	23.8695	Intergenic	30399	388780	LOC388780	uncharacterized LOC388780
76.423	chr1	15663790	15664804	19.3531	Intron (NR_148918, Intron 1 of 1)	6082	101927417	LOC101927417	uncharacterized LOC101927417
76.3418	chr6	79879865	79881328	10.3808	Intergenic	-62795	100288198	HMGN3-AS1	HMGN3 antisense RNA 1
76.2254	chr15	36720077	36721160	20.5403	Intergenic	-151209	84529	C15orf41	chromosome 15 open reading frame 41
76.1606	chr3	55203209	55204438	21.906	Intergenic	-8377	105377096	LINC02017	long intergenic non-protein coding RNA 2017
76.0708	chr16	50228983	50229982	8.8436	Intron (NM_001040285, Intron 2 of 12)	42090	64282	TENT4B	terminal nucleotidyltransferase 4B
76.0604	chr5	72617304	72618309	18.9442	Intergenic	-15927	105379033	LINC02230	long intergenic non-protein coding RNA 2230
76.0058	chr19	21041348	21042347	7.13647	Intergenic	-64210	7639	ZNF85	zinc finger protein 85
75.9599	chr6	65289911	65290924	7.06434	Intron (NM_001292009, Intron 26 of 43)	-720894	441155	LOC441155	zinc finger CCCH-type domain-containing-like
75.9118	chr19	55700407	55701431	16.9125	Intron (NM_002842, Intron 12 of 19)	-9262	6861	SYT5	synaptotagmin 5
75.9089	chrX	64909930	64910929	7.95388	Intron (NM_002444, Intron 1 of 12)	22908	4478	MSN	moesin
75.845	chr6	78078392	78079391	10.3799	Intergenic	94848	3351	HTR1B	5-hydroxytryptamine receptor 1B
75.7619	chr8	74492505	74493504	18.228	Intron (NM_001164384, Intron 10 of 10)	160695	100128126	STAU2-AS1	STAU2 antisense RNA 1
75.7103	chr1	101096383	101097385	20.4208	Intron (NR_038914, Intron 3 of 4)	15676	100128787	LINC01349	long intergenic non-protein coding RNA 1349
75.5957	chr6	105137440	105138441	14.99	Intergenic	169481	57531	HACE1	HECT domain and ankyrin repeat containing E3 ubiquitin protein ligase 1
75.567	chr4	143328765	143330035	25.9935	Intron (NM_001101669, Intron 5 of 25)	438288	8821	INPP4B	inositol polyphosphate-4-phosphatase type II B
75.5581	chr8	118843383	118844431	25.9697	Intron (NM_000127, Intron 3 of 10)	89245	109623457	SNORD168	small nucleolar RNA, C/D box 168
75.4586	chr4	24771588	24772587	7.08576	Intergenic	-25108	6649	SOD3	superoxide dismutase 3
75.424	chr8	55382634	55383644	17.1381	Intergenic	12644	64321	SOX17	SRY-box transcription factor 17
75.413	chr11	28857412	28858664	25.2032	Intergenic	-358943	102466876	MIR8068	microRNA 8068
75.3497	chr12	116819412	116820428	28.0171	Intergenic	46203	100616309	MIR4472-2	microRNA 4472-2
75.3275	chr10	108183491	108184554	14.43	Intergenic	284099	105378470	LINC02624	long intergenic non-protein coding RNA 2624
75.3146	chr11	134136067	134137066	11.8215	TTS (NM_014384)	-9707	112937	GLB1L3	galactosidase beta 1 like 3
75.1634	chr4	43459596	43460595	18.4303	Intron (NR_146993, Intron 2 of 2)	34465	105374436	LINC02383	long intergenic non-protein coding RNA 2383
75.1436	chr20	44409646	44410857	22.5896	Intron (NM_080614, Intron 4 of 6)	10271	140686	WFDC3	WAP four-disulfide core domain 3
75.102	chr7	88058421	88059420	210.433	Intergenic	-122711	79689	STEAP4	STEAP4 metalloreductase
74.9349	chr17	51413306	51414316	7.7677	Intergenic	350946	100506650	C17orf112	chromosome 17 open reading frame 112
74.8821	chr4	183734987	183736088	40.9398	Intergenic	102869	1635	DCTD	dCMP deaminase
74.8604	chr12	8388044	8389066	36.1069	Non-coding (NR_120455, Exon 1 of 2)	544	101927905	LINC02449	long intergenic non-protein coding RNA 2449
74.7695	chr15	48987068	48988070	14.7797	Intergenic	-49584	2200	FBN1	fibrillin 1
74.6279	chr2	110404954	110405974	28.4243	Intergenic	33523	65124	SOWAHC	sosondowah ankyrin repeat domain family member C
74.3851	chr2	31558401	31559428	20.7504	Intron (NM_000379, Intron 35 of 35)	78694	7498	XDH	xanthine dehydrogenase
74.3704	chr17	44486383	44487942	10.9537	Intron (NR_033799, Intron 3 of 6)	36983	728806	NSFP1	N-ethylmaleimide-sensitive factor pseudogene 1
74.2475	chr2	99528697	99529702	35.6479	Intron (NM_207362, Intron 1 of 9)	23489	343990	KIAA1211L	KIAA1211 like
74.2316	chr8	16313565	16314564	10.8589	Intergenic	-263764	4481	MSR1	macrophage scavenger receptor 1
74.1934	chr1	97025357	97026356	14.7416	Intergenic	-161305	58155	PTBP2	polypyrimidine tract binding protein 2
74.177	chr3	30139715	30140727	15.5676	Intergenic	-164574	100873977	RBMS3-AS1	RBMS3 antisense RNA 1
74.1381	chr2	49388937	49390017	11.237	Intergenic	-7811	2492	FSHR	follicle stimulating hormone receptor
73.9875	chr3	8929305	8930618	28.0074	Intron (NM_020165, Intron 12 of 12)	75195	56852	RAD18	RAD18 E3 ubiquitin protein ligase
73.9109	chr8	33070909	33072471	18.1585	Intergenic	258974	84750	FUT10	fucosyltransferase 10
73.8573	chr6	15062316	15063559	31.6617	Intergenic	-183363	3720	JARID2	jumonji and AT-rich interaction domain containing 2
73.8479	chr8	41592583	41593625	13.33	Intron (NM_020477, Intron 2 of 41)	62036	286	ANK1	ankyrin 1
73.822	chr4	40992272	40993313	14.4181	Intron (NM_004307, Intron 6 of 17)	-133583	323	APBB2	amyloid beta precursor protein binding family B member 2
73.7006	chr9	28234584	28235592	11.4683	Intron (NM_152570, Intron 5 of 6)	484215	158038	LINGO2	leucine rich repeat and Ig domain containing 2
73.6859	chr16	53862792	53863811	6.81527	Intron (NM_001363899, Intron 3 of 7)	125233	79068	FTO	FTO alpha-ketoglutarate dependent dioxygenase
73.6507	chr1	238572120	238573119	9.94251	Intergenic	76698	339535	LINC01139	long intergenic non-protein coding RNA 1139
73.6383	chr14	56177592	56178620	10.5021	Intergenic	-54857	645683	RPL13AP3	ribosomal protein L13a pseudogene 3
73.5258	chrX	49759364	49760363	11.3959	Intron (NM_001127899, Intron 3 of 14)	-7891	693124	MIR532	microRNA 532
73.3192	chr4	15914292	15915924	11.2961	Intergenic	25255	9982	FGFBP1	fibroblast growth factor binding protein 1
73.215	chr9	74761750	74762752	27.1709	Intron (NM_001242507, Intron 1 of 13)	-2016	9615	GDA	guanine deaminase
73.0924	chr7	7950646	7951648	24.2135	Intergenic	57236	100505921	LOC100505921	uncharacterized LOC100505921
73.0838	chr8	56792718	56793717	15.8597	Intron (NM_002350, Intron 1 of 12)	823	4067	LYN	LYN proto-oncogene, Src family tyrosine kinase
73.0761	chr9	79191845	79192856	31.6894	Intergenic	76801	2650	GCNT1	glucosaminyl (N-acetyl) transferase 1
73.0033	chr11	94527523	94528544	44.6429	Intron (NM_001301007, Intron 1 of 11)	26511	154810	AMOTL1	angiomotin like 1
72.9319	chr8	60976274	60977273	13.2249	Intergenic	217186	767	CA8	carbonic anhydrase 8
72.8836	chr12	122387625	122388643	12.7215	Intron (NM_001178003, Intron 8 of 17)	31636	144406	WDR66	WD repeat domain 66
72.8561	chr8	72170022	72171034	32.1157	Intron (NM_001370335, Intron 14 of 20)	98413	2138	EYA1	EYA transcriptional coactivator and phosphatase 1
72.8291	chr2	223155333	223156343	22.2904	Intron (NM_001127366, Intron 4 of 8)	-7028	151278	CCDC140	coiled-coil domain containing 140
72.8099	chr15	48937519	48938518	22.2095	Promoter-TSS (NM_000138)	-33	2200	FBN1	fibrillin 1
72.5703	chr3	82523546	82525164	9.02318	Intergenic	489062	105377180	LINC02008	long intergenic non-protein coding RNA 2008
72.5515	chr1	101639910	101641058	17.7972	Intergenic	61600	101928370	LOC101928370	uncharacterized LOC101928370
72.5093	chr5	172357867	172358876	36.4868	Intron (NM_001031711, Intron 7 of 9)	16285	113218510	MIR10523	microRNA 10523
72.4894	chr3	60558919	60559918	11.3016	Intron (NM_001354589, Intron 4 of 8)	44185	103504735	MIR548BB	microRNA 548bb
72.4501	chr4	108204431	108205478	19.542	Intergenic	-247484	27123	DKK2	dickkopf WNT signaling pathway inhibitor 2
72.4329	chr2	240008416	240009415	12.2874	Intron (NM_006037, Intron 19 of 26)	-1293	100616493	MIR4441	microRNA 4441
72.3784	chr20	9267056	9268055	13.6598	Intron (NM_001172646, Intron 2 of 37)	-20892	5332	PLCB4	phospholipase C beta 4
72.3707	chr6	71905993	71907717	28.0667	Intergenic	-91659	79627	OGFRL1	opioid growth factor receptor like 1
72.3114	chr7	85040068	85041094	79.0678	Intergenic	-9857	105375380	LINC00972	long intergenic non-protein coding RNA 972
72.2302	chr2	236611384	236612411	12.2653	Intron (NM_014914, Intron 1 of 16)	-185332	27321	TNRC17	trinucleotide repeat containing 17
72.0729	chr1	228603597	228604596	7.55716	5' UTR (NM_001134855, Exon 1 of 6)	466	51127	TRIM17	tripartite motif containing 17
72.0598	chr6	62068049	62069055	14.2562	Intergenic	-215483	100463487	MTRNR2L9	MT-RNR2 like 9
72.0442	chr10	77267875	77268889	23.1943	Intron (NM_001305581, Intron 2 of 6)	-43834	693191	MIR606	microRNA 606
72.0311	chr1	9760104	9761145	11.763	Intron (NM_001350235, Intron 1 of 22)	9099	5293	PIK3CD	phosphatidylinositol-4,5-bisphosphate 3-kinase catalytic subunit delta
71.9947	chr6	110088867	110090352	20.0874	Intron (NM_014845, Intron 15 of 22)	77185	9896	FIG4	FIG4 phosphoinositide 5-phosphatase
71.9759	chr15	37123407	37124460	13.8621	Intergenic	-13226	161635	CSNK1A1P1	casein kinase 1 alpha 1 pseudogene 1
71.9277	chr11	23918686	23919685	10.1648	Intergenic	-478449	102465860	MIR8054	microRNA 8054
71.828	chr20	31062842	31063847	43.5335	Intron (NM_001256798, Intron 4 of 10)	7949	140688	NOL4L	nucleolar protein 4 like
71.8199	chrX	68218844	68219899	16.1187	Intergenic	165925	64219	PJA1	praja ring finger ubiquitin ligase 1
71.8018	chr12	401086	402085	10.5277	Intron (NM_001042603, Intron 27 of 27)	-29546	6540	SLC6A13	solute carrier family 6 member 13
71.7877	chr2	101592753	101593822	35.9681	Non-coding (NR_110213, Exon 1 of 3)	336	101927142	LOC101927142	uncharacterized LOC101927142
71.7856	chr4	169802609	169803622	14.9177	Intron (NM_001166110, Intron 2 of 11)	49869	23022	PALLD	palladin, cytoskeletal associated protein
71.7099	chr21	18375203	18376205	12.6702	Intergenic	413147	406912	MIR125B2	microRNA 125b-2
71.7003	chr11	6340663	6341682	40.2767	Intron (NM_145040, Intron 1 of 1)	559	112464	CAVIN3	caveolae associated protein 3
71.6783	chr1	19360185	19361184	13.6531	Intergenic	-77514	126917	IFFO2	intermediate filament family orphan 2
71.6737	chr2	204144816	204145818	12.1403	Intron (NM_177538, Intron 8 of 12)	42153	57404	CYP20A1	cytochrome P450 family 20 subfamily A member 1
71.6339	chr4	129259490	129260489	7.92491	Intergenic	-51021	10424	PGRMC2	progesterone receptor membrane component 2
71.5762	chr11	106269453	106270452	39.9496	Intergenic	147818	101928535	LOC101928535	uncharacterized LOC101928535
71.5623	chr9	31185547	31186585	13.6918	Intergenic	195422	101929620	LINC01243	long intergenic non-protein coding RNA 1243
71.4098	chr8	1599601	1600600	8.9863	Intron (NM_001346810, Intron 8 of 14)	-30270	100507435	DLGAP2-AS1	DLGAP2 antisense RNA 1
71.3756	chr15	48676868	48677888	14.6849	Intergenic	52984	1854	DUT	deoxyuridine triphosphatase
71.3104	chr13	98931728	98932794	15.8596	Intron (NM_001286839, Intron 2 of 27)	71483	100422881	MIR3170	microRNA 3170
71.3025	chr4	138675781	138676811	18.1096	Intergenic	209411	105377443	LINC02172	long intergenic non-protein coding RNA 2172
71.1295	chr7	87056455	87057454	57.4776	Intron (NM_000443, Intron 15 of 27)	48042	5244	ABCB4	ATP binding cassette subfamily B member 4
71.1238	chr3	58079143	58080258	27.9526	Intron (NM_001164317, Intron 4 of 46)	76662	105377105	FLNB-AS1	FLNB antisense RNA 1
71.1071	chr18	19792917	19794086	14.7506	Intergenic	44103	2627	GATA6	GATA binding protein 6
71.0431	chr6	3247047	3248599	31.469	Intergenic	-11358	389362	PSMG4	proteasome assembly chaperone 4
70.9672	chr15	83698458	83699457	7.41057	Exon (NM_001011885, Exon 5 of 7)	-18566	123207	C15orf40	chromosome 15 open reading frame 40
70.8615	chr12	6225528	6226527	12.3205	Intron (NM_000552, Intron 3 of 51)	7814	7450	VWF	von Willebrand factor
70.8512	chr15	35102315	35103626	20.4997	Non-coding (NR_120329, Exon 3 of 3)	-15220	70	ACTC1	actin alpha cardiac muscle 1
70.8485	chr4	71897508	71898512	10.4745	Intergenic	38644	1633	DCK	deoxycytidine kinase
70.8251	chr9	73568770	73569802	17.6206	Intron (NM_001366143, Intron 1 of 25)	-85318	80036	TRPM3	transient receptor potential cation channel subfamily M member 3
70.8154	chr19	54048146	54049151	28.0756	Intron (NM_001317113, Intron 2 of 4)	6606	55422	ZNF331	zinc finger protein 331
70.7633	chr1	235560726	235561725	12.0402	Intron (NM_001287802, Intron 2 of 15)	30483	6905	TBCE	tubulin folding cofactor E
70.7376	chr3	111408737	111409760	10.2442	Intron (NM_001185106, Intron 1 of 4)	-12968	100874115	PLCXD2-AS1	PLCXD2 antisense RNA 1
70.7333	chr19	7525037	7526219	32.0202	Intron (NM_001130955, Intron 10 of 19)	21054	23370	ARHGEF18	Rho/Rac guanine nucleotide exchange factor 18
70.6082	chr1	68035771	68036789	20.3335	Intergenic	-114604	1647	GADD45A	growth arrest and DNA damage inducible alpha
70.6061	chr18	6718816	6719828	17.2733	Intergenic	-10393	79822	ARHGAP28	Rho GTPase activating protein 28
70.5904	chr5	169397578	169398889	31.8574	Intron (NM_001346304, Intron 1 of 3)	9266	100131897	INSYN2B	inhibitory synaptic factor family member 2B
70.555	chr4	123811736	123812735	7.36814	Intron (NM_001361665, Intron 2 of 2)	31517	11162	NUDT6	nudix hydrolase 6
70.5426	chr2	241309271	241310270	49.7952	Intergenic	-65310	2817	GPC1	glypican 1
70.5002	chr9	115318550	115319549	14.8754	Intron (NM_133465, Intron 1 of 3)	-69125	100133204	C9orf147	chromosome 9 open reading frame 147
70.373	chr9	2809478	2810510	13.7785	Intron (NM_014878, Intron 16 of 17)	34101	9933	PUM3	pumilio RNA binding family member 3
70.2725	chr12	89460899	89461898	9.55671	Intergenic	-47929	728084	LINC02458	long intergenic non-protein coding RNA 2458
70.2402	chr7	88175761	88176760	343.433	Intergenic	-212754	219578	ZNF804B	zinc finger protein 804B
70.2078	chr12	122362185	122363207	23.2337	Intron (NM_001178003, Intron 3 of 17)	6198	144406	WDR66	WD repeat domain 66
70.1706	chr17	2262500	2263524	66.833	Intron (NM_001098509, Intron 2 of 22)	22217	9905	SGSM2	small G protein signaling modulator 2
70.1615	chr2	75814639	75815687	9.79465	Intergenic	-18318	84141	EVA1A	eva-1 homolog A, regulator of programmed cell death
70.1454	chr2	239835966	239836994	17.2135	Intergenic	11485	401039	LINC01940	long intergenic non-protein coding RNA 1940
69.9384	chr1	235147255	235148311	29.4773	Intergenic	-48037	101927851	LOC101927851	uncharacterized LOC101927851
69.8996	chr8	67131716	67132729	30.6399	Intergenic	27873	100505659	LINC00967	long intergenic non-protein coding RNA 967
69.8837	chr4	150440432	150441555	23.3886	Intron (NM_001363507, Intron 12 of 13)	296002	285423	IQCM	IQ motif containing M
69.8143	chr1	98518168	98519176	20.2665	Intergenic	-3423	400765	MIR137HG	MIR137 host gene
69.7346	chr16	69951402	69952403	14.6015	Intron (NM_001270453, Intron 7 of 20)	-7040	11060	WWP2	WW domain containing E3 ubiquitin protein ligase 2
69.6849	chr2	234321882	234322881	23.4243	Intron (NM_152879, Intron 3 of 29)	25581	8527	DGKD	diacylglycerol kinase delta
69.6248	chr17	46723803	46724802	21.1214	Intergenic	-14381	406972	MIR196A1	microRNA 196a-1
69.4786	chr8	67737131	67738177	12.5189	Intron (NM_001204173, Intron 8 of 18)	-45352	157777	MCMDC2	minichromosome maintenance domain containing 2
69.4751	chr6	107429109	107430111	8.39286	Intron (NM_001080450, Intron 1 of 4)	6026	57673	BEND3	BEN domain containing 3
69.4708	chr8	8521675	8522674	10.1749	Intergenic	-37273	137075	CLDN23	claudin 23
69.3898	chr4	158035567	158036566	9.24519	Intron (NM_001166061, Intron 2 of 8)	38511	2743	GLRB	glycine receptor beta
69.3892	chr13	114599728	114600881	12.3418	Intron (NM_001278674, Intron 1 of 7)	2228	643365	LINC00452	long intergenic non-protein coding RNA 452
69.3573	chr1	27098871	27099887	23.3467	Exon (NM_139135, Exon 14 of 20)	-15075	55650	PIGV	phosphatidylinositol glycan anchor biosynthesis class V
69.3471	chr9	29213445	29214811	26.0551	Promoter-TSS (NM_001258282)	-529	158038	LINGO2	leucine rich repeat and Ig domain containing 2
69.2193	chr7	64029374	64030388	22.202	Intergenic	-5192	100128885	LOC100128885	uncharacterized LOC100128885
69.0972	chr20	61584838	61585837	22.4256	Intron (NM_001302643, Intron 2 of 13)	1276	63910	SLC17A9	solute carrier family 17 member 9
69.067	chr1	243430072	243431071	20.2457	Intron (NM_001350248, Intron 1 of 18)	11228	10806	SDCCAG8	serologically defined colon cancer antigen 8
69.0074	chr13	95919589	95920592	19.4299	Intron (NM_005845, Intron 1 of 30)	33610	10257	ABCC4	ATP binding cassette subfamily C member 4
68.9745	chr12	1306136	1307445	10.4506	Intron (NM_178039, Intron 11 of 17)	169876	23085	ERC1	ELKS/RAB6-interacting/CAST family member 1
68.913	chr3	58550144	58551143	17.3372	3' UTR (NM_001282714, Exon 5 of 5)	12475	11170	FAM107A	family with sequence similarity 107 member A
68.8994	chr11	36383254	36384260	18.1503	Intron (NM_001160167, Intron 1 of 8)	-13778	79899	PRR5L	proline rich 5 like
68.8434	chr17	42550522	42551523	10.0376	Intron (NM_001304940, Intron 3 of 9)	29752	23131	GPATCH8	G-patch domain containing 8
68.8272	chr9	76732373	76733372	5.75217	Intergenic	-253575	101927358	LOC101927358	uncharacterized LOC101927358
68.8191	chr6	13156297	13157296	8.50473	Intron (NM_001322312, Intron 2 of 11)	126878	100130357	LOC100130357	uncharacterized LOC100130357
68.8162	chr17	46560446	46561452	47.5034	Intergenic	38754	101927166	LOC101927166	uncharacterized LOC101927166
68.8017	chr11	92662483	92663496	15.5235	Intergenic	-14195	105369431	LINC02746	long intergenic non-protein coding RNA 2746
68.7254	chr11	23746977	23747976	10.1952	Intergenic	-306740	102465860	MIR8054	microRNA 8054
68.7125	chr11	123389411	123390431	25.3933	Intron (NM_001330396, Intron 2 of 19)	-6413	57476	GRAMD1B	GRAM domain containing 1B
68.7103	chr2	83064760	83065759	7.17817	Intergenic	-18668	1720	DHFRP3	dihydrofolate reductase pseudogene 3
68.7014	chr7	87376385	87377394	68.9775	Intron (NM_001134405, Intron 6 of 10)	-34250	5243	ABCB1	ATP binding cassette subfamily B member 1
68.5438	chr15	96816675	96817674	30.3918	Intron (NR_102743, Intron 5 of 7)	-52101	7026	NR2F2	nuclear receptor subfamily 2 group F member 2
68.1928	chr7	87387029	87388028	32.3916	Intron (NM_001134405, Intron 6 of 10)	-44889	5243	ABCB1	ATP binding cassette subfamily B member 1
68.1477	chrX	71421350	71422349	7.12024	Intron (NM_001170747, Intron 3 of 3)	20242	5303	PIN4	peptidylprolyl cis/trans isomerase, NIMA-interacting 4
68.0013	chr11	64043866	64044883	41.3629	Intron (NM_004322, Intron 1 of 2)	-7437	56834	GPR137	G protein-coupled receptor 137
67.9802	chr1	17516093	17517099	22.6575	Intron (NR_148993, Intron 1 of 3)	312	400743	LINC02783	long intergenic non-protein coding RNA 2783
67.9483	chr11	124768001	124769000	30.572	Promoter-TSS (NM_019055)	-739	54538	ROBO4	roundabout guidance receptor 4
67.8623	chr4	23681944	23683066	9.85017	Intergenic	200410	10891	PPARGC1A	PPARG coactivator 1 alpha
67.8306	chr11	128318100	128319157	24.7268	Intergenic	73577	2113	ETS1	ETS proto-oncogene 1, transcription factor
67.7532	chr9	16704933	16705936	34.5765	Intron (NM_001317940, Intron 2 of 5)	-21378	111216284	BNC2-AS1	BNC2 antisense RNA 1
67.6686	chr10	6770666	6771682	15.1577	Intergenic	-8170	108570035	LINP1	lncRNA in non-homologous end joining pathway 1
67.6314	chr7	87883748	87884766	68.0524	Intergenic	-27949	6717	SRI	sorcin
67.6171	chr11	15918768	15919770	10.582	Intergenic	71898	102464826	MIR6073	microRNA 6073
67.5356	chrX	95958550	95959549	6.37913	Intron (NM_007309, Intron 1 of 26)	19208	1730	DIAPH2	diaphanous related formin 2
67.5252	chr17	30823390	30824400	30.0902	Intron (NM_015194, Intron 21 of 21)	9884	8851	CDK5R1	cyclin dependent kinase 5 regulatory subunit 1
67.5001	chr8	43107942	43108941	9.20952	Intergenic	-39144	340441	POTEA	POTE ankyrin domain family member A
67.498	chr8	38696731	38697751	8.65037	Intron (NM_001352803, Intron 6 of 10)	34273	6867	TACC1	transforming acidic coiled-coil containing protein 1
67.4965	chr19	3564795	3565794	12.0426	Intergenic	-7648	10362	HMG20B	high mobility group 20B
67.4486	chr15	62761691	62762690	14.1272	Intergenic	126962	102464834	MIR6085	microRNA 6085
67.4108	chr7	20424481	20425519	26.4978	Intron (NM_002214, Intron 6 of 13)	-53615	101927811	LOC101927811	uncharacterized LOC101927811
67.4019	chr15	92410511	92411541	12.3237	Intron (NR_135775, Intron 1 of 10)	13492	28232	SLCO3A1	solute carrier organic anion transporter family member 3A1
67.3305	chr2	170040290	170041289	6.34473	Intron (NM_004525, Intron 50 of 78)	103172	10170	DHRS9	dehydrogenase/reductase 9
67.3029	chr5	72707999	72709155	11.5737	Intergenic	36025	2297	FOXD1	forkhead box D1
67.2985	chr12	3072728	3073810	26.2228	Intron (NM_201443, Intron 1 of 10)	4168	7004	TEAD4	TEA domain transcription factor 4
67.2584	chr1	69988438	69989437	9.15256	Intergenic	-44080	57554	LRRC7	leucine rich repeat containing 7
67.1812	chr1	16275285	16276716	21.4267	Intron (NM_001287603, Intron 2 of 15)	26627	7709	ZBTB17	zinc finger and BTB domain containing 17
67.0413	chr11	116596256	116597300	22.1908	Intergenic	46925	84811	BUD13	BUD13 homolog
67.0079	chr12	15489693	15490700	16.3274	Intron (NM_030667, Intron 1 of 26)	14754	5800	PTPRO	protein tyrosine phosphatase receptor type O
66.9839	chr9	14992778	14993803	11.8038	Promoter-TSS (NR_003920)	-35	389705	LOC389705	histone PARylation factor 1 pseudogene
66.9615	chr6	35337896	35338896	26.4714	Intron (NM_001171819, Intron 2 of 6)	28061	5467	PPARD	peroxisome proliferator activated receptor delta
66.9569	chr11	106489730	106491065	9.97451	Intergenic	368263	101928535	LOC101928535	uncharacterized LOC101928535
66.8955	chr2	235929988	235930987	16.8369	Intron (NM_001371304, Intron 2 of 5)	-5892	#N/A
66.8714	chr16	67449905	67450911	14.4598	Promoter-TSS (NM_013304)	-28	29800	ZDHHC1	zinc finger DHHC-type containing 1
66.8683	chr18	67711583	67712582	7.0037	Intron (NM_001318520, Intron 39 of 47)	-88047	10666	CD226	CD226 molecule
66.8394	chr2	120861218	120862276	46.946	Exon (NM_001330307, Exon 17 of 17)	91094	57669	EPB41L5	erythrocyte membrane protein band 4.1 like 5
66.8253	chr20	4206201	4207200	15.365	Intron (NM_000678, Intron 1 of 1)	23234	146	ADRA1D	adrenoceptor alpha 1D
66.7784	chr17	70712027	70713038	13.6431	Intron (NM_001352691, Intron 8 of 10)	-75921	400619	LINC00511	long intergenic non-protein coding RNA 511
66.7565	chr4	41162131	41163148	41.4645	Intron (NM_173075, Intron 1 of 16)	53920	323	APBB2	amyloid beta precursor protein binding family B member 2
66.7156	chr14	27896657	27897689	9.6003	Intron (NR_148991, Intron 2 of 2)	-184621	100505967	LINC00645	long intergenic non-protein coding RNA 645
66.714	chr11	88287933	88288938	17.9785	Intron (NM_001143831, Intron 7 of 8)	50691	100873989	GRM5-AS1	GRM5 antisense RNA 1
66.7101	chr12	121627891	121628902	15.172	Intergenic	-19536	5025	P2RX4	purinergic receptor P2X 4
66.7026	chr7	85194253	85195266	85.8961	Intergenic	144321	105375380	LINC00972	long intergenic non-protein coding RNA 972
66.6923	chr11	13389267	13390266	14.4511	Intron (NM_001351811, Intron 11 of 19)	72060	84280	BTBD10	BTB domain containing 10
66.6013	chr10	64342237	64343236	6.85146	Intron (NM_199452, Intron 1 of 6)	62529	22891	ZNF365	zinc finger protein 365
66.5741	chr16	67345292	67346296	35.652	Intron (NM_001100915, Intron 2 of 15)	14850	146212	KCTD19	potassium channel tetramerization domain containing 19
66.5536	chr6	105073135	105074137	22.8699	Intergenic	233785	57531	HACE1	HECT domain and ankyrin repeat containing E3 ubiquitin protein ligase 1
66.4733	chr8	52335698	52336708	6.87223	Exon (NM_144651, Exon 14 of 23)	385802	137902	PXDNL	peroxidasin like
66.4616	chr11	85396722	85397757	36.8464	Promoter-TSS (NM_152723)	-1	220388	CCDC89	coiled-coil domain containing 89
66.4522	chr7	88196024	88197058	77.6621	Intergenic	-192473	219578	ZNF804B	zinc finger protein 804B
66.4216	chr12	1469649	1470659	9.61377	Intron (NR_027948, Intron 15 of 19)	-139503	100292680	LINC00942	long intergenic non-protein coding RNA 942
66.3899	chr4	1317431	1318439	64.3182	Intron (NM_001297432, Intron 4 of 8)	14356	10296	MAEA	macrophage erythroblast attacher
66.3704	chr2	9427452	9429051	31.0782	Intron (NM_001135191, Intron 2 of 26)	81310	8853	ASAP2	ArfGAP with SH3 domain, ankyrin repeat and PH domain 2
66.3597	chr11	111990786	111992225	20.7812	Intergenic	33908	6392	SDHD	succinate dehydrogenase complex subunit D
66.334	chr11	93868001	93870160	22.2045	Intron (NM_015368, Intron 1 of 4)	7073	24145	PANX1	pannexin 1
66.3294	chr7	87139402	87140454	103.49	Intron (NM_001348946, Intron 25 of 27)	-34909	5244	ABCB4	ATP binding cassette subfamily B member 4
66.3125	chr1	228416125	228417176	17.841	Intron (NM_001098623, Intron 9 of 104)	-15285	574407	OBSCN-AS1	OBSCN antisense RNA 1
66.2139	chr12	31593230	31594302	11.0779	Intron (NM_144973, Intron 7 of 20)	-71531	101929027	LINC02387	long intergenic non-protein coding RNA 2387
66.1856	chr5	169212887	169213948	15.0254	Intron (NR_156756, Intron 25 of 52)	149138	1794	DOCK2	dedicator of cytokinesis 2
66.1763	chr6	15526029	15527360	9.90987	Intron (NR_036448, Intron 9 of 9)	136565	84062	DTNBP1	dystrobrevin binding protein 1
66.1614	chr6	139899121	139900120	10.3736	Intergenic	-103887	645434	LINC01625	long intergenic non-protein coding RNA 1625
66.1393	chr4	119260185	119261301	17.3785	Intron (NM_003619, Intron 1 of 12)	13415	8492	PRSS12	serine protease 12
66.1349	chr10	35660898	35661956	21.5489	Intron (NM_001282852, Intron 1 of 8)	35625	219771	CCNY	cyclin Y
66.0969	chrX	3302100	3303099	6.90908	Intergenic	-37906	25878	MXRA5	matrix remodeling associated 5
66.0813	chr5	76254477	76255476	12.4869	Intron (NM_001882, Intron 5 of 6)	6106	1393	CRHBP	corticotropin releasing hormone binding protein
66.0253	chr2	110361765	110362775	31.8395	Intron (NM_001321510, Intron 1 of 7)	8974	151011	SEPTIN10	septin 10
65.9464	chr2	235904689	235905798	20.8468	Intron (NM_001371304, Intron 2 of 5)	15225	#N/A
65.8771	chr11	60267804	60268807	17.1773	Intron (NM_001164470, Intron 2 of 5)	8054	54860	MS4A12	membrane spanning 4-domains A12
65.8744	chr1	6746187	6747186	9.6556	Intron (NM_018198, Intron 1 of 15)	15190	55735	DNAJC11	DnaJ heat shock protein family (Hsp40) member C11
65.8468	chr1	240656100	240657111	25.2491	Exon (NM_022469, Exon 2 of 2)	118850	64388	GREM2	gremlin 2, DAN family BMP antagonist
65.8219	chr7	55312618	55313620	17.2951	Intron (NR_110426, Intron 2 of 3)	10209	102725541	ELDR	EGFR long Non-coding downstream RNA
65.7883	chr11	32234487	32235567	9.54296	Intergenic	-69569	106635521	SNORA88	small nucleolar RNA, H/ACA box 88
65.7582	chr16	53760182	53761181	6.21369	Intron (NM_001363897, Intron 1 of 7)	22613	79068	FTO	FTO alpha-ketoglutarate dependent dioxygenase
65.7501	chr4	19777253	19778288	19.2661	Intergenic	-475758	9353	SLIT2	slit guidance ligand 2
65.7177	chr8	19223312	19224311	5.45093	Intron (NR_156444, Intron 7 of 8)	52324	63898	SH2D4A	SH2 domain containing 4A
65.6603	chr2	96305990	96308235	47.8312	Intergenic	49363	129868	TRIM43	tripartite motif containing 43
65.5769	chr2	58345540	58346602	21.3105	Intron (NM_001288836, Intron 8 of 13)	72224	7444	VRK2	VRK serine/threonine kinase 2
65.4994	chr16	11110530	11111564	16.264	Intron (NM_015226, Intron 10 of 22)	72626	23274	CLEC16A	C-type lectin domain containing 16A
65.4513	chr5	159894396	159895640	17.6065	Promoter-TSS (NR_132748)	-240	107075116	MIR3142HG	MIR3142 host gene
65.4379	chr5	125781949	125782952	20.9147	Intron (NR_146196, Intron 1 of 14)	-18392	65983	GRAMD2B	GRAM domain containing 2B
65.4287	chr5	172324366	172325432	44.0682	Intron (NM_001031711, Intron 3 of 9)	-17187	113218510	MIR10523	microRNA 10523
65.4121	chr6	4355180	4356200	30.2017	Intergenic	-133342	105374895	LINC02533	long intergenic non-protein coding RNA 2533
65.4058	chr11	122016842	122017841	9.58796	Promoter-TSS (NR_029477)	-40	406882	MIRLET7A2	microRNA let-7a-2
65.3176	chr7	84834651	84835865	67.2181	Intergenic	-84011	223117	SEMA3D	semaphorin 3D
65.2095	chr3	89006589	89007589	11.2039	Intergenic	-149682	2042	EPHA3	EPH receptor A3
65.1289	chr17	33349183	33350492	15.0742	Intron (NR_037713, Intron 2 of 6)	40889	117584	RFFL	ring finger and FYVE like domain containing E3 ubiquitin protein ligase
65.124	chr17	48286628	48288433	21.2532	Intergenic	-4525	101927230	LINC01969	long intergenic non-protein coding RNA 1969
65.1111	chr1	231944467	231945490	11.978	Intron (NM_001164538, Intron 8 of 10)	9285	27184	DISC2	disrupted in schizophrenia 2
65.1017	chr1	56038458	56039461	22.5981	Intergenic	347645	100616272	MIR4422	microRNA 4422
65.0931	chr12	246804	247809	24.9824	Intron (NR_033859, Intron 9 of 9)	11029	574538	LOC574538	uncharacterized LOC574538
64.8744	chr7	130597760	130598851	46.453	Promoter-TSS (NR_034120)	82	100506860	LINC00513	long intergenic non-protein coding RNA 513
64.7787	chr9	25917786	25918785	8.97467	Intergenic	138231	101929582	LINC01241	long intergenic non-protein coding RNA 1241
64.7089	chr18	10925677	10926677	29.2564	Intron (NM_022068, Intron 3 of 51)	-166530	102466735	MIR6788	microRNA 6788
64.6543	chr6	112201136	112202135	12.8862	Intergenic	-6980	2534	FYN	FYN proto-oncogene, Src family tyrosine kinase
64.6019	chr4	95331550	95332549	11.4942	Intergenic	-40959	10611	PDLIM5	PDZ and LIM domain 5
64.516	chr11	13237597	13238604	31.669	Intergenic	-60099	406	ARNTL	aryl hydrocarbon receptor nuclear translocator like
64.4908	chr16	10435362	10436464	34.4221	Intergenic	-44005	80063	ATF7IP2	activating transcription factor 7 interacting protein 2
64.4649	chr15	96902622	96903621	16.1637	Intergenic	26127	7026	NR2F2	nuclear receptor subfamily 2 group F member 2
64.3872	chr10	129789184	129790197	22.4545	Intron (NM_001316677, Intron 1 of 20)	4146	5791	PTPRE	protein tyrosine phosphatase receptor type E
64.2927	chr21	19745657	19746656	9.43893	Intron (NM_002772, Intron 5 of 24)	29946	5651	TMPRSS15	transmembrane serine protease 15
64.2296	chr6	72318075	72319076	17.3472	Intergenic	187845	102724000	LINC01626	long intergenic non-protein coding RNA 1626
64.2251	chr12	1566838	1567849	26.864	Intron (NR_027948, Intron 19 of 19)	-42314	100292680	LINC00942	long intergenic non-protein coding RNA 942
64.1933	chr8	13229568	13230567	5.15783	Intron (NM_024767, Intron 4 of 4)	-95774	10395	DLC1	DLC1 Rho GTPase activating protein
64.1862	chr8	32290076	32291089	20.5612	Intron (NM_013962, Intron 1 of 4)	-7680	100874286	NRG1-IT3	NRG1 Intronic transcript 3
64.1209	chr4	75096209	75097220	12.6443	Intron (NM_001144978, Intron 6 of 7)	72879	441024	MTHFD2L	methylenetetrahydrofolate dehydrogenase (NADP+ dependent) 2 like
64.1116	chr6	162394848	162395867	27.6874	Intron (NM_013988, Intron 2 of 8)	503348	105378098	LOC105378098	uncharacterized LOC105378098
64.0861	chr9	27519600	27520607	28.1133	Intron (NM_024761, Intron 1 of 3)	-4209	56832	IFNK	interferon kappa
64.0327	chr18	9016776	9017777	29.3331	Intergenic	-85421	4729	NDUFV2	NADH:ubiquinone oxidoreductase core subunit V2
63.8812	chr14	89891905	89893068	30.2628	Intron (NM_001085471, Intron 1 of 6)	8788	400236	FOXN3-AS1	FOXN3 antisense RNA 1
63.8622	chr4	158191967	158192966	9.36507	Intron (NM_001083620, Intron 2 of 15)	50586	2891	GRIA2	glutamate ionotropic receptor AMPA type subunit 2
63.7918	chr11	60073026	60074030	19.3355	Intron (NM_148975, Intron 5 of 6)	25389	51338	MS4A4A	membrane spanning 4-domains A4A
63.7778	chr7	84772226	84773324	48.1067	Intergenic	-21528	223117	SEMA3D	semaphorin 3D
63.7523	chr7	131176756	131177770	20.0358	3' UTR (NM_013255, Exon 18 of 18)	64124	5420	PODXL	podocalyxin like
63.7176	chr1	247909449	247911518	30.6399	Intron (NM_001355292, Intron 1 of 4)	977	388761	OR14A2	olfactory receptor family 14 subfamily A member 2
63.7105	chr1	24592591	24593838	38.7999	Intergenic	-52633	57822	GRHL3	grainyhead like transcription factor 3
63.681	chr12	121714461	121715481	20.3033	Intron (NM_153500, Intron 1 of 14)	-2583	10645	CAMKK2	calcium/calmodulin dependent protein kinase kinase 2
63.6685	chr22	38634774	38635795	36.3922	Intron (NM_001195071, Intron 3 of 8)	-14557	106635525	SNORA92	small nucleolar RNA, H/ACA box 92
63.656	chr1	90174928	90175927	10.4193	Intron (NM_032270, Intron 2 of 2)	76748	84230	LRRC8C	leucine rich repeat containing 8 VRAC subunit C
63.6381	chr8	70032696	70033695	8.66713	Intergenic	-16770	100505718	LINC01592	long intergenic non-protein coding RNA 1592
63.5308	chr10	134345960	134346960	29.8719	Intron (NR_158224, Intron 1 of 3)	3967	107984282	LOC107984282	uncharacterized LOC107984282
63.4618	chr8	119558528	119559535	15.0239	Intron (NM_001349811, Intron 2 of 4)	-74209	552860	SAMD12-AS1	SAMD12 antisense RNA 1
63.3633	chr17	69185012	69186011	19.2934	Intron (NR_104152, Intron 1 of 3)	12809	101928165	CASC17	cancer susceptibility 17
63.3103	chr5	148345030	148346036	62.6384	Intergenic	96439	693169	MIR584	microRNA 584
63.2708	chr7	85325759	85326758	19.1576	Intergenic	275820	105375380	LINC00972	long intergenic non-protein coding RNA 972
63.2599	chr6	74275473	74277389	21.7969	Intergenic	-45676	1915	EEF1A1	eukaryotic translation elongation factor 1 alpha 1
63.2107	chr14	75038279	75039295	31.109	Intron (NM_000428, Intron 3 of 35)	40153	4053	LTBP2	latent transforming growth factor beta binding protein 2
63.1197	chr16	56648188	56649187	21.8687	Intergenic	-2686	4500	MT1L	metallothionein 1L, pseudogene
63.1148	chr1	65730943	65731965	12.3039	Intron (NM_014787, Intron 1 of 18)	1022	9829	DNAJC6	DnaJ heat shock protein family (Hsp40) member C6
63.0946	chr4	3905670	3906741	12.8169	Intergenic	50950	348926	FAM86EP	family with sequence similarity 86, member A pseudogene
63.0703	chr11	98891234	98892384	19.4932	5' UTR (NM_001243271, Exon 1 of 21)	130	53942	CNTN5	contactin 5
63.0229	chr4	107789453	107790465	11.7652	Intergenic	167511	27123	DKK2	dickkopf WNT signaling pathway inhibitor 2
62.9946	chr8	69168870	69169888	31.7476	Intergenic	-73229	116328	C8orf34	chromosome 8 open reading frame 34
62.8487	chr11	108766291	108767290	12.1744	Intron (NM_004398, Intron 16 of 17)	230994	1662	DDX10	DEAD-box helicase 10
62.8472	chr2	108913590	108914606	22.9178	Intron (NM_001056, Intron 3 of 7)	8747	6819	SULT1C2	sulfotransferase family 1C member 2
62.8049	chr20	60214910	60215973	18.9019	Intron (NM_001252339, Intron 1 of 14)	40624	1002	CDH4	cadherin 4
62.7651	chr14	65704977	65706536	42.6501	Intergenic	-16691	100128233	LINC02324	long intergenic non-protein coding RNA 2324
62.7513	chr7	16752225	16753273	25.9215	Intergenic	-40631	27075	TSPAN13	tetraspanin 13
62.7461	chr14	79477566	79478571	38.1993	Intron (NR_073547, Intron 14 of 20)	-188257	105370586	LOC105370586	uncharacterized LOC105370586
62.7209	chr1	28669579	28670578	6.56144	Intergenic	14527	54797	MED18	mediator complex subunit 18
62.6718	chr3	115507381	115508380	29.5607	Intergenic	116093	109623450	SNORD155	small nucleolar RNA, C/D box 155
62.6658	chr13	94962375	94963393	16.1538	Intron (NM_005708, Intron 6 of 8)	-122639	100873972	GPC6-AS1	GPC6 antisense RNA 1
62.6562	chr4	148024392	148025404	18.8353	Intergenic	-157860	83894	TTC29	tetratricopeptide repeat domain 29
62.5716	chr11	124790372	124791371	16.7394	TTS (NM_001037558)	1725	641654	HEPN1	hepatocellular carcinoma, down-regulated 1
62.5077	chr11	128584449	128585462	23.991	Intron (NM_001271010, Intron 1 of 9)	-19037	100507392	SENCR	smooth muscle and endothelial cell enriched migration/differentiation-associated lncRNA
62.5008	chr11	130253168	130254167	33.4388	Intron (NR_148980, Intron 2 of 6)	44837	11095	ADAMTS8	ADAM metallopeptidase with thrombospondin type 1 motif 8
62.3931	chr8	56072185	56073184	10.3137	Intron (NM_052898, Intron 1 of 2)	58096	114786	XKR4	XK related 4
62.3904	chr11	89855772	89856772	24.167	Intergenic	-11559	10003	NAALAD2	N-acetylated alpha-linked acidic dipeptidase 2
62.3825	chr1	234044553	234045552	27.4401	Intron (NM_173508, Intron 2 of 7)	4630	148641	SLC35F3	solute carrier family 35 member F3
62.3576	chr10	3509214	3510371	25.7681	Intron (NR_155743, Intron 3 of 4)	35238	101927880	LINC02669	long intergenic non-protein coding RNA 2669
62.3417	chr7	87323827	87324826	33.0158	Intron (NM_138290, Intron 3 of 11)	18313	5243	ABCB1	ATP binding cassette subfamily B member 1
62.255	chr15	25200966	25202334	17.3991	Intron (NM_001349464, Intron 1 of 9)	1511	6638	SNRPN	small nuclear ribonucleoprotein polypeptide N
62.2541	chr4	151808314	151809316	13.016	Intron (NM_006726, Intron 17 of 57)	127604	987	LRBA	LPS responsive beige-like anchor protein
62.2448	chr6	147311065	147312072	15.7642	Intron (NR_034115, Intron 6 of 10)	-168493	106182249	LUADT1	lung adenocarcinoma associated transcript 1
62.1517	chrX	137979849	137980938	11.744	Intron (NM_001139500, Intron 2 of 6)	-30676	2258	FGF13	fibroblast growth factor 13
62.1217	chr10	70425616	70426623	12.2515	Intron (NM_030625, Intron 6 of 11)	-54877	55749	CCAR1	cell division cycle and apoptosis regulator 1
62.1216	chr2	112620485	112621484	11.7504	Intron (NM_022662, Intron 9 of 47)	20786	64682	ANAPC1	anaphase promoting complex subunit 1
62.1049	chr20	62855360	62856372	24.5433	Intron (NM_004535, Intron 16 of 22)	-31182	55251	PCMTD2	protein-L-isoaspartate (D-aspartate) O-methyltransferase domain containing 2
62.0237	chr2	178256954	178257953	15.1209	Promoter-TSS (NR_026966)	-34	100130691	LOC100130691	uncharacterized LOC100130691
62.0095	chr11	114237277	114238281	36.8633	Intron (NR_120567, Intron 2 of 2)	12982	101928940	LOC101928940	uncharacterized LOC101928940
61.9643	chr6	100650187	100651186	16.4493	Intergenic	-208572	84539	MCHR2	melanin concentrating hormone receptor 2
61.9361	chr8	30747571	30748576	6.44197	Intron (NM_001350162, Intron 2 of 10)	-1851	56154	TEX15	testis expressed 15, meiosis and synapsis associated
61.9073	chr9	69659173	69660197	34.7376	Intron (NR_160670, Intron 4 of 4)	7533	101929583	LOC101929583	methylenetetrahydrofolate dehydrogenase (NADP+ dependent) 1 like pseudogene
61.9018	chr19	48221969	48223016	23.1697	Intron (NM_014601, Intron 3 of 5)	5813	30846	EHD2	EH domain containing 2
61.8327	chr11	123524835	123525933	27.3377	Promoter-TSS (NM_018400)	-69	55800	SCN3B	sodium voltage-gated channel beta subunit 3
61.7985	chr4	143012565	143013610	20.3385	Intron (NM_001101669, Intron 23 of 25)	455351	3600	IL15	interleukin 15
61.723	chr5	98098627	98099626	11.18	Intergenic	-5210	285704	RGMB	repulsive guidance molecule BMP co-receptor b
61.6353	chr3	153869350	153870365	18.9622	Intron (NM_015595, Intron 5 of 14)	30678	26084	ARHGEF26	Rho guanine nucleotide exchange factor 26
61.578	chr3	59222583	59223587	12.8234	Intergenic	-187327	200844	C3orf67	chromosome 3 open reading frame 67
61.5774	chr9	105629327	105630441	9.82447	Intergenic	-127731	1539	CYLC2	cylicin 2
61.5699	chr2	144183554	144184553	9.69703	Intron (NM_018460, Intron 6 of 13)	297065	55843	ARHGAP15	Rho GTPase activating protein 15
61.5317	chr6	155533460	155534461	21.9384	Intron (NM_012454, Intron 14 of 25)	-4140	26230	TIAM2	T cell lymphoma invasion and metastasis 2
61.4823	chr11	106986767	106987766	11.6062	Intergenic	-98064	2977	GUCY1A2	guanylate cyclase 1 soluble subunit alpha 2
61.4124	chr8	132300467	132301612	26.4037	Intergenic	-247884	114	ADCY8	adenylate cyclase 8
61.3864	chr9	67018254	67019363	55.6699	Non-coding (NR_046175, Exon 4 of 4).2	11383	101929583	LOC101929583	methylenetetrahydrofolate dehydrogenase (NADP+ dependent) 1 like pseudogene
61.3538	chr3	115723827	115724867	23.5705	Intron (NM_002338, Intron 3 of 6)	-100374	109623450	SNORD155	small nucleolar RNA, C/D box 155
61.3478	chr8	77317910	77319058	15.645	Promoter-TSS (NR_105006)	-405	101926978	LINC01111	long intergenic non-protein coding RNA 1111
61.3473	chr12	6656932	6657931	12.8959	Intron (NM_001039670, Intron 7 of 9)	7777	25900	IFFO1	intermediate filament family orphan 1
61.3384	chr2	11356116	11357131	11.4219	Intron (NM_004850, Intron 12 of 32)	61030	130814	SLC66A3	solute carrier family 66 member 3
61.3176	chr1	94203539	94204750	27.5729	Intron (NM_001261408, Intron 2 of 13)	36795	723788	MIG7	mig-7
61.26	chr4	8257866	8258876	12.0732	Intergenic	-13110	94031	HTRA3	HtrA serine peptidase 3
61.2265	chr9	17630398	17631397	8.97057	Intron (NM_003026, Intron 1 of 8)	51833	6456	SH3GL2	SH3 domain containing GRB2 like 2, endophilin A1
61.1834	chr3	85637860	85639080	15.2823	Intron (NM_001256503, Intron 2 of 9)	84261	253559	CADM2	cell adhesion molecule 2
61.178	chr21	17935735	17936757	29.4006	Intron (NR_136547, Intron 2 of 2)	24098	406885	MIRLET7C	microRNA let-7c
61.1403	chr11	18433295	18434294	10.6449	Promoter-TSS (NM_002301)	-59	3948	LDHC	lactate dehydrogenase C
61.1392	chr1	88421359	88422383	8.76395	Intergenic	-584533	100505768	LINC01364	long intergenic non-protein coding RNA 1364
61.1333	chr1	224839656	224840655	12.8238	Intron (NR_136287, Intron 1 of 4)	36136	149111	CNIH3	cornichon family AMPA receptor auxiliary protein 3
61.1271	chr3	110295444	110296444	12.9658	Intergenic	492862	100506555	NECTIN3-AS1	NECTIN3 antisense RNA 1
61.1212	chr8	55475294	55476301	22.9751	Intergenic	-52859	6101	RP1	RP1 axonemal microtubule associated
61.0611	chr8	23309880	23310879	10.279	Intron (NM_001128930, Intron 1 of 12)	4781	9583	ENTPD4	ectonucleoside triphosphate diphosphohydrolase 4
61.0286	chr19	6610744	6611802	24.7862	Intergenic	-20112	970	CD70	CD70 molecule
60.9441	chr9	118434561	118436527	22.0873	Intergenic	70974	101928775	LOC101928775	uncharacterized LOC101928775
60.9388	chr6	82271630	82272629	10.8425	Intergenic	190269	55603	TENT5A	terminal nucleotidyltransferase 5A
60.9332	chr13	98037034	98038035	12.1657	Intron (NM_144778, Intron 8 of 8)	-48889	5911	RAP2A	RAP2A, member of RAS oncogene family
60.8747	chr15	83955953	83957128	15.9505	Intergenic	-3124	646	BNC1	basonuclin 1
60.8653	chr1	25041251	25042291	19.0409	Intergenic	-30167	25932	CLIC4	chloride intracellular channel 4
60.848	chr18	7577444	7578447	14.5894	Intron (NM_001105244, Intron 1 of 32)	10631	5797	PTPRM	protein tyrosine phosphatase receptor type M
60.8294	chr8	142140759	142141770	37.799	Intron (NM_014957, Intron 1 of 22)	2576	22898	DENND3	DENN domain containing 3
60.7914	chr7	84863293	84864297	76.9161	Intergenic	-112548	223117	SEMA3D	semaphorin 3D
60.7066	chr13	30435495	30436638	23.7286	Intergenic	-11312	5412	UBL3	ubiquitin like 3
60.6923	chr20	18232962	18233987	35.1767	Intergenic	-35398	7692	ZNF133	zinc finger protein 133
60.6434	chr17	30487766	30489685	21.2001	Intron (NM_001288755, Intron 1 of 18)	-10135	503640	ARGFXP2	arginine-fifty homeobox pseudogene 2
60.6124	chr15	39524390	39525442	12.7549	Intergenic	-17954	400360	C15orf54	chromosome 15 open reading frame 54 (putative)
60.6038	chr17	15857201	15858214	21.3216	Intron (NM_000676, Intron 1 of 1)	9476	136	ADORA2B	adenosine A2b receptor
60.5895	chrX	68150177	68151186	28.4747	Intergenic	101841	1947	EFNB1	ephrin B1
60.5453	chr8	50968607	50969643	25.1719	Intron (NM_001287814, Intron 1 of 16)	-107566	54212	SNTG1	syntrophin gamma 1
60.5213	chr14	104482922	104484299	16.0891	Intron (NM_153046, Intron 22 of 35)	-68427	374569	ASPG	asparaginase
60.4248	chr4	4576751	4577753	11.3729	Intron (NR_037888, Intron 2 of 5)	-33182	53407	STX18	syntaxin 18
60.3381	chr9	112885643	112886642	18.3688	Intron (NM_001198656, Intron 1 of 4)	-1639	445815	PALM2-AKAP2	PALM2-AKAP2 fusion
60.3238	chr22	45523400	45524451	11.7624	Intergenic	24540	100506714	NUP50-DT	NUP50 divergent transcript
60.298	chr9	18459595	18460594	14.1122	Intergenic	-14057	92949	ADAMTSL1	ADAMTS like 1
60.2744	chr8	52501721	52503215	23.5798	Intron (NM_144651, Intron 3 of 22)	219537	137902	PXDNL	peroxidasin like
60.2178	chr11	7041170	7042179	16.5881	Promoter-TSS (NR_148988)	-26	338323	NLRP14	NLR family pyrin domain containing 14
60.1851	chrX	68246947	68247946	21.0157	Intergenic	137850	64219	PJA1	praja ring finger ubiquitin ligase 1
60.0469	chr14	25478804	25479803	17.6776	Intron (NM_001351940, Intron 1 of 6)	38903	29091	STXBP6	syntaxin binding protein 6
60.0213	chr9	112877904	112879475	12.4154	Intron (NM_001198656, Intron 1 of 4)	-9092	445815	PALM2-AKAP2	PALM2-AKAP2 fusion
59.989	chr6	159062847	159063909	27.1996	Intron (NM_006519, Intron 1 of 4)	2397	6993	DYNLT1	dynein light chain Tctex-type 1
59.9648	chr11	66653798	66654797	24.6566	Intron (NM_001040716, Intron 3 of 22)	21127	5091	PC	pyruvate carboxylase
59.8878	chr1	64128145	64129240	30.3562	Intergenic	39805	5236	PGM1	phosphoglucomutase 1
59.8609	chr13	103934588	103936063	11.9236	Intergenic	-142225	104326190	LINC01309	long intergenic non-protein coding RNA 1309
59.8109	chr1	236071769	236072827	21.9035	Intergenic	-25285	1130	LYST	lysosomal trafficking regulator
59.8047	chr6	70890462	70891466	24.3648	Intron (NM_001858, Intron 44 of 50)	101936	1297	COL9A1	collagen type IX alpha 1 chain
59.763	chr19	9128426	9129558	14.9321	Intergenic	-36974	94025	MUC16	mucin 16, cell surface associated
59.7374	chr1	210612179	210613184	23.7652	Intron (NM_018194, Intron 7 of 11)	109971	55733	HHAT	hedgehog acyltransferase
59.711	chr10	6790557	6791572	32.2731	Intergenic	11720	108570035	LINP1	lncRNA in non-homologous end joining pathway 1
59.7017	chr10	71463159	71464158	12.6481	Intergenic	73655	219738	FAM241B	family with sequence similarity 241 member B
59.6853	chr14	26669577	26670588	15.5604	Intergenic	352554	4857	NOVA1	NOVA alternative splicing regulator 1
59.6602	chr15	27111699	27112698	15.0782	Promoter-TSS (NM_001165037)	-11	2558	GABRA5	gamma-aminobutyric acid type A receptor alpha5 subunit
59.577	chr5	14174126	14175125	16.7313	Intron (NR_134469, Intron 1 of 56)	31174	7204	TRIO	trio Rho guanine nucleotide exchange factor
59.5561	chr17	73194802	73195861	22.432	Intergenic	-6200	79902	NUP85	nucleoporin 85
59.5399	chr4	124156195	124157296	24.4225	Intron (NM_001345856, Intron 14 of 15)	-161205	10252	SPRY1	sprouty RTK signaling antagonist 1
59.5101	chr1	8885806	8886805	8.72314	Intergenic	-8606	473	RERE	arginine-glutamic acid dipeptide repeats
59.5084	chr5	11068860	11069875	25.0874	Intron (NM_001364128, Intron 14 of 19)	-308021	1611	DAP	death associated protein
59.4881	chr5	14233996	14235004	16.7154	Intron (NR_134469, Intron 1 of 56)	91049	7204	TRIO	trio Rho guanine nucleotide exchange factor
59.4833	chr2	92008168	92009169	82.8031	Intergenic	45300	645367	GGT8P	gamma-glutamyltransferase 8 pseudogene
59.4795	chr3	43935417	43936433	15.3755	Intergenic	-202839	55129	ANO10	anoctamin 10
59.4272	chr11	122067372	122068509	16.1239	Intron (NR_137192, Intron 2 of 3)	5877	399959	MIR100HG	mir-100-let-7a-2-mir-125b-1 cluster host gene
59.4001	chr2	13961068	13962067	8.09887	Intergenic	579515	100499171	LINC00276	long intergenic non-protein coding RNA 276
59.328	chr19	1131775	1132774	11.9893	Promoter-TSS (NM_001100122)	-54	22904	SBNO2	strawberry notch homolog 2
59.2979	chr14	69161755	69162754	48.3725	Intergenic	-66750	100996664	LOC100996664	uncharacterized LOC100996664
59.2592	chr12	28687952	28689414	8.50099	Intron (NM_001352081, Intron 13 of 13)	-345012	729291	LOC729291	uncharacterized LOC729291
59.1769	chr12	5917862	5918861	21.0924	Intron (NM_001364791, Intron 7 of 24)	136064	57101	ANO2	anoctamin 2
59.1756	chr21	16990034	16991058	23.0219	Intergenic	-111707	29761	USP25	ubiquitin specific peptidase 25
59.1692	chr7	12150766	12152150	35.2901	Intergenic	-99462	54664	TMEM106B	transmembrane protein 106B
59.1184	chr1	228350378	228351383	37.7312	TTS (NR_103539)	1669	574432	IBA57-DT	IBA57 divergent transcript
59.1164	chr8	122028897	122030263	26.9353	Intergenic	-205294	6641	SNTB1	syntrophin beta 1
59.1119	chr15	41061284	41062325	23.3929	Promoter-TSS (NM_001130448)	-374	643338	C15orf62	chromosome 15 open reading frame 62
59.1086	chr1	2120598	2121680	18.4064	Non-coding (NR_046427, Exon 4 of 4)	5072	199990	FAAP20	FA core complex associated protein 20
59.1082	chr16	47921134	47922741	33.2217	Promoter-TSS (NR_110649)	-896	100507534	LINC02192	long intergenic non-protein coding RNA 2192
59.0718	chr8	66442822	66443823	20.3813	Intron (NR_033893, Intron 3 of 4)	31579	286186	LINC01299	long intergenic non-protein coding RNA 1299
58.9738	chr7	55119491	55120517	21.8948	Intron (NM_001346941, Intron 1 of 21)	33279	1956	EGFR	epidermal growth factor receptor
58.923	chr8	72273489	72274956	31.8618	Promoter-TSS (NM_000503)	82	2138	EYA1	EYA transcriptional coactivator and phosphatase 1
58.7917	chr2	37938241	37939642	18.9771	Intergenic	-39263	10602	CDC42EP3	CDC42 effector protein 3
58.7817	chr19	9649094	9650093	12.3652	Promoter-TSS (NM_024106)	251	101928238	ZNF426-DT	ZNF426 divergent transcript
58.7586	chr10	84047787	84048923	34.3561	Intron (NM_001370082, Intron 3 of 10)	-55679	101929590	NRG3-AS1	NRG3 antisense RNA 1
58.7533	chr6	118709073	118710077	18.9085	Intergenic	-112961	23629	BRD7P3	bromodomain containing 7 pseudogene 3
58.7285	chr11	96579217	96580218	12.8552	Intergenic	338128	105369443	LINC02737	long intergenic non-protein coding RNA 2737
58.7102	chr14	62031083	62032086	74.7404	Non-coding (NR_110416, Exon 4 of 5)	5328	101927780	LINC01303	long intergenic non-protein coding RNA 1303
58.6917	chr8	13210395	13211840	9.78406	Intron (NM_024767, Intron 4 of 4)	-76824	10395	DLC1	DLC1 Rho GTPase activating protein
58.6758	chr6	112133589	112134588	10.4463	Intron (NM_153047, Intron 2 of 13)	-52968	2534	FYN	FYN proto-oncogene, Src family tyrosine kinase
58.6322	chr2	120013127	120014132	32.2416	Intron (NM_001008410, Intron 4 of 4)	-6982	100874111	STEAP3-AS1	STEAP3 antisense RNA 1
58.6047	chr11	44437874	44439108	6.97921	Intergenic	-106802	60529	ALX4	ALX homeobox 4
58.5899	chr11	113561004	113562071	85.3634	Intron (NM_030770, Intron 10 of 12)	15493	80975	TMPRSS5	transmembrane serine protease 5
58.5408	chr2	241144475	241145474	8.37444	Intergenic	-64899	150677	OTOS	otospiralin
58.4838	chr7	84940506	84941511	79.4168	Intergenic	-109430	105375380	LINC00972	long intergenic non-protein coding RNA 972
58.4672	chr8	50728953	50729970	10.5501	Intergenic	-92895	54212	SNTG1	syntrophin gamma 1
58.4639	chr5	106162514	106163526	8.49913	Intron (NR_104671, Intron 2 of 3)	183695	102467213	LINC01950	long intergenic non-protein coding RNA 1950
58.4502	chr8	32782213	32783216	11.1188	Intergenic	203361	3084	NRG1	neuregulin 1
58.4488	chr2	145700198	145701197	17.8846	Intron (NR_033870, Intron 3 of 4)	275163	401014	TEX41	testis expressed 41
58.4396	chr17	1682710	1683709	6.41732	3' UTR (NM_052928, Exon 11 of 11)	8244	5176	SERPINF1	serpin family F member 1
58.3555	chr14	27310831	27311853	22.7032	Intergenic	-20016	101927062	LINC02294	long intergenic non-protein coding RNA 2294
58.329	chr4	84029130	84030129	16.7963	Intron (NM_001130715, Intron 1 of 3)	1413	51316	PLAC8	placenta associated 8
58.3009	chr11	35104918	35105917	22.6411	Intergenic	54162	100507144	LOC100507144	uncharacterized LOC100507144
58.2533	chr20	30318183	30319244	22.9257	Intergenic	-6947	598	BCL2L1	BCL2 like 1
58.2508	chr9	29556061	29557066	6.09114	Intergenic	-342964	158038	LINGO2	leucine rich repeat and Ig domain containing 2
58.2456	chr8	74371586	74372585	42.3668	Intron (NM_001164383, Intron 8 of 9)	39776	100128126	STAU2-AS1	STAU2 antisense RNA 1
58.2417	chr5	119903321	119904320	10.9804	Intron (NM_001308088, Intron 1 of 3)	36661	51334	PRR16	proline rich 16
58.2016	chr14	28963139	28964138	5.48647	Intergenic	270887	103695363	FOXG1-AS1	FOXG1 antisense RNA 1
58.1107	chr20	37229942	37230953	23.343	Promoter-TSS (NM_001164431)	-5	343578	ARHGAP40	Rho GTPase activating protein 40
58.1091	chr9	16144166	16145221	11.4657	Intergenic	108412	100129385	C9orf92	chromosome 9 open reading frame 92
58.084	chr7	20447053	20448167	21.9633	Intron (NM_002214, Intron 12 of 13)	-76225	101927811	LOC101927811	uncharacterized LOC101927811
58.0163	chr4	133137510	133138509	11.9058	Intergenic	-374235	104355285	LINC01256	long intergenic non-protein coding RNA 1256
58.0078	chr9	100985171	100986193	19.3228	Intron (NR_051978, Intron 4 of 11)	5817	102465514	MIR6854	microRNA 6854
57.9651	chr17	36605359	36606391	24.807	Intron (NM_001199417, Intron 1 of 23)	21167	57636	ARHGAP23	Rho GTPase activating protein 23
57.9507	chr18	32347184	32348266	20.8288	Intron (NM_001128175, Intron 4 of 11)	11785	1837	DTNA	dystrobrevin alpha
57.9377	chr2	56089078	56090533	13.8665	Intergenic	61112	2202	EFEMP1	EGF containing fibulin extracellular matrix protein 1
57.9035	chr1	31845695	31847103	14.7459	Promoter-TSS (NM_001320996)	-264	2170	FABP3	fatty acid binding protein 3
57.8906	chr2	223573602	223574706	31.9249	Intron (NM_058165, Intron 5 of 5)	37777	116255	MOGAT1	monoacylglycerol O-acyltransferase 1
57.8852	chr15	93344261	93345592	31.7616	Intergenic	6212	728619	ASB9P1	ankyrin repeat and SOCS box containing 9 pseudogene 1
57.8473	chr17	47278547	47279690	21.0762	Intergenic	7625	2793	GNGT2	G protein subunit gamma transducin 2
57.8415	chr19	7543986	7545034	21.8609	Intron (NM_001300881, Intron 3 of 4)	9411	92960	PEX11G	peroxisomal biogenesis factor 11 gamma
57.8166	chr12	111147996	111149034	19.3526	Intergenic	-20933	84329	HVCN1	hydrogen voltage gated channel 1
57.7598	chr8	48522371	48523372	30.0009	Intron (NR_148205, Intron 10 of 18)	-43779	23514	SPIDR	scaffold protein involved in DNA repair
57.7206	chr5	37248950	37250020	19.2421	Promoter-TSS (NM_023073)	45	65250	CPLANE1	ciliogenesis and planar polarity effector 1
57.709	chr6	73521526	73522526	13.9272	Intron (NM_001160134, Intron 1 of 11)	155450	100423005	MIR4282	microRNA 4282
57.7047	chr20	30654663	30655961	31.651	Intron (NM_001172132, Intron 2 of 13)	15267	3055	HCK	HCK proto-oncogene, Src family tyrosine kinase
57.6799	chr9	117481223	117483172	27.2856	Intergenic	-37828	100505478	TEX48	testis expressed 48
57.6561	chr5	176543520	176544528	15.2176	Intergenic	-16056	64324	NSD1	nuclear receptor binding SET domain protein 1
57.6551	chr6	11770697	11771735	53.9688	Intron (NM_001143948, Intron 1 of 6)	8064	84830	ADTRP	androgen dependent TFPI regulating protein
57.6491	chr22	18514121	18515875	17.6142	Intron (NR_024417, Intron 1 of 1)	2847	100192420	LINC01634	long intergenic non-protein coding RNA 1634
57.6451	chr9	8208108	8209138	17.0343	Intergenic	-408845	90871	DMAC1	distal membrane arm assembly complex 1
57.6416	chr6	139723655	139724824	21.8474	Intergenic	-28454	10370	CITED2	Cbp/p300 interacting transactivator with Glu/Asp rich carboxy-terminal domain 2
57.6066	chr17	29575681	29576680	9.0916	Intron (NM_000267, Intron 30 of 56)	48077	4974	OMG	oligodendrocyte myelin glycoprotein
57.5874	chr6	73134759	73135759	11.531	Intergenic	58811	22999	RIMS1	regulating synaptic membrane exocytosis 1
57.567	chr3	136537376	136538941	25.139	5' UTR (NM_025246, Exon 1 of 2)	190	80723	SLC35G2	solute carrier family 35 member G2
57.5529	chr22	19679026	19680025	12.0717	Intergenic	-22501	5413	SEPTIN5	septin 5
57.5401	chr9	139466165	139467166	49.257	Intergenic	24371	101928483	NALT1	NOTCH1 associated lncRNA in T cell acute lymphoblastic leukemia 1
57.5248	chr11	112369136	112370171	28.5759	Intron (NR_120559, Intron 2 of 2)	14585	101928823	LINC02763	long intergenic non-protein coding RNA 2763
57.5075	chr8	61367744	61368773	22.7824	Intergenic	-41881	100505532	LINC01301	long intergenic non-protein coding RNA 1301
57.4436	chr2	227443225	227444270	10.3786	Intergenic	79762	100847053	MIR5702	microRNA 5702
57.4409	chr8	141997461	141998461	37.4193	Intron (NM_001352705, Intron 1 of 34)	13142	5747	PTK2	protein tyrosine kinase 2
57.416	chr7	84670629	84671635	215.859	Intron (NM_152754, Intron 8 of 16)	80115	223117	SEMA3D	semaphorin 3D
57.3405	chr16	10702852	10703891	18.7781	Intergenic	-28916	2013	EMP2	epithelial membrane protein 2
57.3359	chr17	3497417	3498996	37.6629	Intron (NM_080704, Intron 2 of 16)	919	7442	TRPV1	transient receptor potential cation channel subfamily V member 1
57.3316	chr12	56854585	56855585	26.9757	Intergenic	-6644	4284	MIP	major intrinsic protein of lens fiber
57.3052	chr2	69480695	69481808	16.3603	Intergenic	133108	2673	GFPT1	glutamine--fructose-6-phosphate transaminase 1
57.2763	chr4	139656926	139657925	12.0277	Intergenic	276375	105377448	LOC105377448	uncharacterized LOC105377448
57.2372	chr3	58033230	58034231	25.8818	Intron (NM_001164317, Intron 1 of 46)	39581	2317	FLNB	filamin B
57.2195	chr16	10817369	10818368	8.64316	Intergenic	-19775	4682	NUBP1	nucleotide binding protein 1
57.1938	chr9	40736330	40737342	11.8308	Intergenic	21312	728495	FAM74A3	family with sequence similarity 74 member A3
57.1835	chr19	7462339	7463439	13.0468	Intron (NM_015318, Intron 1 of 20)	2858	23370	ARHGEF18	Rho/Rac guanine nucleotide exchange factor 18
57.1773	chr3	70048216	70049215	12.4435	Promoter-TSS (NR_110000)	-180	101927152	SAMMSON	survival associated mitochondrial melanoma specific oncogenic Non-coding RNA
57.1317	chr8	126692130	126693193	55.5725	Intergenic	248210	10221	TRIB1	tribbles pseudokinase 1
57.1105	chr8	55294285	55295284	11.4185	Intergenic	51538	26766	RNU105C	RNA, U105C small nucleolar
57.0869	chr10	135072410	135073409	16.5643	Intergenic	-11520	101927671	MIR202HG	MIR202 host gene
57.0838	chr12	30975107	30976362	19.5695	Intergenic	27119	100287314	LINC00941	long intergenic non-protein coding RNA 941
57.0781	chr5	39272165	39273238	13.228	Intergenic	-1950	2533	FYB1	FYN binding protein 1
57.0274	chr6	68393523	68394533	13.6525	Intergenic	-371215	102723883	LOC102723883	uncharacterized LOC102723883
56.9651	chr14	62935324	62936323	18.6316	Intergenic	-329132	101954204	LINC00644	long intergenic non-protein coding RNA 644
56.9556	chr8	118921909	118922923	25.2454	Intron (NM_000127, Intron 1 of 10)	10736	109623457	SNORD168	small nucleolar RNA, C/D box 168
56.9283	chr11	58395169	58396168	34.3141	Intergenic	5530	1270	CNTF	ciliary neurotrophic factor
56.9186	chr1	101665769	101666773	11.8686	Intergenic	35813	101928370	LOC101928370	uncharacterized LOC101928370
56.8878	chr17	36276478	36277477	10.8189	Intergenic	-7000	414060	TBC1D3C	TBC1 domain family member 3C
56.8715	chr4	157867392	157868391	13.7915	Intron (NR_036641, Intron 1 of 6)	25060	56034	PDGFC	platelet derived growth factor C
56.863	chrX	8725535	8726534	5.95824	Intergenic	-25856	3730	ANOS1	anosmin 1
56.8598	chr19	21266798	21267797	14.7867	Intron (NR_117088, Intron 2 of 4)	2288	148206	ZNF714	zinc finger protein 714
56.8561	chr5	37792810	37793809	10.1485	Intergenic	41615	2668	GDNF	glial cell derived neurotrophic factor
56.8304	chr2	209223863	209224871	22.4781	Promoter-TSS (NM_001309516)	-49	5746	PTH2R	parathyroid hormone 2 receptor
56.7606	chr15	35017459	35018458	15.4307	Intergenic	29241	57369	GJD2	gap junction protein delta 2
56.7052	chr11	12188312	12189311	10.9848	Intron (NR_144420, Intron 3 of 27)	3581	102466906	MIR6124	microRNA 6124
56.7049	chr9	74278743	74279752	16.4958	Intergenic	104182	23670	CEMIP2	cell migration inducing hyaluronidase 2
56.6951	chr3	66463571	66464570	13.6771	Intron (NM_015541, Intron 5 of 18)	86775	26018	LRIG1	leucine rich repeats and immunoglobulin like domains 1
56.6757	chr15	59483798	59484803	11.8327	Intron (NM_004998, Intron 17 of 27)	-14742	92483	LDHAL6B	lactate dehydrogenase A like 6B
56.6743	chrX	73875935	73876967	13.4179	Intergenic	-41992	51132	RLIM	ring finger protein, LIM domain interacting
56.6722	chr9	18543260	18545135	12.0705	Intron (NM_001040272, Intron 3 of 28)	-29107	100422869	MIR3152	microRNA 3152
56.6465	chr12	48206256	48207256	16.6144	Intron (NR_160436, Intron 1 of 25)	6930	51564	HDAC7	histone deacetylase 7
56.5635	chr9	90182155	90183202	19.4539	Intron (NM_001288729, Intron 2 of 25)	14309	100506897	DAPK1-IT1	DAPK1 Intronic transcript 1
56.5397	chr9	67297180	67298401	38.9268	Intron (NR_160665, Intron 3 of 3)	7339	102724580	LOC102724580	methylenetetrahydrofolate dehydrogenase (NADP+ dependent) 1 like pseudogene
56.4834	chr4	41126859	41127873	16.1694	Intron (NM_173075, Intron 2 of 16)	89193	323	APBB2	amyloid beta precursor protein binding family B member 2
56.468	chr11	101316681	101317680	18.3805	Intergenic	73456	100500823	MIR3920	microRNA 3920
56.4617	chr6	71021479	71022554	12.1528	Intergenic	-9229	1297	COL9A1	collagen type IX alpha 1 chain
56.3893	chr1	59374532	59375542	9.11606	Intergenic	-111111	101926925	LINC01358	long intergenic non-protein coding RNA 1358
56.3877	chr7	55027951	55029038	14.3893	Intergenic	-58216	1956	EGFR	epidermal growth factor receptor
56.3721	chr20	37434366	37435437	13.6515	Intron (NM_001172735, Intron 1 of 9)	561	26051	PPP1R16B	protein phosphatase 1 regulatory subunit 16B
56.3631	chr11	106239050	106240102	23.0647	Intergenic	117442	101928535	LOC101928535	uncharacterized LOC101928535
56.3065	chr2	189641049	189642437	10.6393	Intron (NR_161166, Intron 1 of 1)	13107	116093	DIRC1	disrupted in renal carcinoma 1
56.282	chr1	240548587	240550371	13.4835	Intron (NM_001305424, Intron 15 of 18)	225976	64388	GREM2	gremlin 2, DAN family BMP antagonist
56.235	chr8	1734310	1735309	10.0422	TTS (NM_018941)	-14482	100500912	MIR3674	microRNA 3674
56.2203	chr11	12714925	12715938	13.9937	Intron (NM_021961, Intron 2 of 12)	19463	7003	TEAD1	TEA domain transcription factor 1
56.1992	chr21	37117626	37118625	7.67736	Intergenic	25112	768219	MIR802	microRNA 802
56.1844	chr9	135089043	135090182	27.8721	Intron (NM_032536, Intron 3 of 7)	52167	84628	NTNG2	netrin G2
56.1589	chr14	71584695	71585704	25.6789	Intergenic	-201994	26037	SIPA1L1	signal induced proliferation associated 1 like 1
56.1469	chr20	56099142	56100163	29.4162	Non-coding (NR_072975, Exon 1 of 11)	271	140690	CTCFL	CCCTC-binding factor like
56.135	chr14	86381773	86383008	11.4238	Intergenic	-18632	101928767	LINC02328	long intergenic non-protein coding RNA 2328
56.0559	chr12	24513471	24514713	12.1627	Intron (NM_001261414, Intron 3 of 16)	137887	101928471	SOX5-AS1	SOX5 antisense RNA 1
56.0412	chr11	99844388	99845387	7.64336	Intron (NM_014361, Intron 8 of 24)	418011	53942	CNTN5	contactin 5
56.0209	chr16	66652146	66653164	17.8949	3' UTR (NM_181521, Exon 4 of 4)	14021	123920	CMTM3	CKLF like MARVEL transmembrane domain containing 3
56.0142	chr21	30008974	30009973	17.4594	Intergenic	97833	118421	LINC00161	long intergenic non-protein coding RNA 161
55.9397	chr4	186264897	186266003	18.5767	Intron (NM_001317781, Intron 12 of 18)	34702	55805	LRP2BP	LRP2 binding protein
55.9152	chr7	65588424	65589491	20.3586	Intron (NM_001040648, Intron 1 of 2)	9123	27297	CRCP	CGRP receptor component
55.9009	chr4	38375747	38376755	19.6564	Intron (NR_149123, Intron 1 of 1)	7716	105374410	LINC02513	long intergenic non-protein coding RNA 2513
55.8692	chr6	130687037	130688036	18.0892	Promoter-TSS (NM_001258275)	110	114801	TMEM200A	transmembrane protein 200A
55.775	chr8	130697579	130698580	45.0123	Intergenic	-5594	137196	CCDC26	CCDC26 long Non-coding RNA
55.711	chr12	6539417	6540433	30.6706	Intergenic	-14126	939	CD27	CD27 molecule
55.7062	chr17	1325914	1326916	45.6515	3' UTR (NM_005206, Exon 3 of 3)	-22859	7531	YWHAE	tyrosine 3-monooxygenase/tryptophan 5-monooxygenase activation protein epsilon
55.6766	chr8	62317069	62318068	14.6156	Intron (NM_173519, Intron 3 of 5)	117039	157807	CLVS1	clavesin 1
55.6758	chr2	161886673	161887672	8.41652	Intergenic	-106294	10010	TANK	TRAF family member associated NFKB activator
55.6645	chr2	162941736	162942735	11.0989	Intergenic	10868	100131604	LOC100131604	uncharacterized LOC100131604
55.5979	chr14	51771339	51772406	28.6993	Intron (NR_145423, Intron 1 of 1)	23231	161342	LINC00519	long intergenic non-protein coding RNA 519
55.5322	chr4	33838282	33839281	7.59035	Intergenic	202734	101928622	LOC101928622	uncharacterized LOC101928622
55.5248	chr1	183581969	183583062	16.2768	Intergenic	22403	10092	ARPC5	actin related protein 2/3 complex subunit 5
55.5093	chr11	112397102	112398102	26.7956	Intron (NR_120559, Intron 2 of 2)	28923	387810	LINC02764	long intergenic non-protein coding RNA 2764
55.4768	chr14	19891831	19892841	25.3637	Intron (NR_122112, Intron 7 of 7).2	-2033	414763	BMS1P18	BMS1 pseudogene 18
55.4537	chr1	239437172	239438171	10.7618	Intergenic	-112197	1131	CHRM3	cholinergic receptor muscarinic 3
55.4101	chr4	104058307	104059312	17.6875	Intron (NM_001813, Intron 39 of 48)	-37818	56898	BDH2	3-hydroxybutyrate dehydrogenase 2
55.4079	chr1	164734553	164735552	7.57367	Intron (NM_001204963, Intron 2 of 8)	8826	100505795	LOC100505795	uncharacterized LOC100505795
55.4011	chr2	238373834	238374834	13.7884	Intergenic	-20719	79083	MLPH	melanophilin
55.3443	chr19	31704729	31705736	37.4804	Intron (NR_138036, Intron 2 of 4)	46816	107985312	LINC01791	long intergenic non-protein coding RNA 1791
55.2738	chr17	3438395	3439488	15.4082	Exon (NM_001258205, Exon 7 of 18)	-21795	84690	SPATA22	spermatogenesis associated 22
55.2705	chr9	132890922	132891956	19.1151	3' UTR (NM_001287346, Exon 17 of 17)	15059	401554	GPRACR	GPR107 adjacent cis regulating lncRNA
55.2688	chr11	95232316	95233418	15.8862	Intergenic	-267228	143686	SESN3	sestrin 3
55.183	chr20	11830607	11831606	13.8972	Intron (NR_110635, Intron 1 of 1)	20257	728450	LINC00687	long intergenic non-protein coding RNA 687
55.1771	chr13	73995093	73996101	25.901	Intergenic	-142784	100874155	LINC00392	long intergenic non-protein coding RNA 392
55.1707	chr5	31365059	31366058	19.6077	Intergenic	166642	29102	DROSHA	drosha ribonuclease III
55.1642	chr9	74656463	74657543	14.0301	Intergenic	18518	138240	C9orf57	chromosome 9 open reading frame 57
55.1313	chr21	32654137	32655275	14.3356	Intron (NM_001353687, Intron 2 of 26)	61963	7074	TIAM1	T cell lymphoma invasion and metastasis 1
55.0914	chr10	4569488	4570541	15.3951	Intergenic	121353	100507059	LINC00703	long intergenic non-protein coding RNA 703
55.0791	chr1	79297036	79298038	14.7425	Intergenic	174878	64123	ADGRL4	adhesion G protein-coupled receptor L4
55.0761	chr17	19229575	19231044	18.3188	Intron (NM_001102664, Intron 4 of 7)	17578	100302256	MIR1180	microRNA 1180
55.0658	chr9	115949892	115950920	24.1958	Intron (NM_015258, Intron 13 of 27)	33151	23307	FKBP15	FKBP prolyl isomerase 15
55.0506	chr18	74812981	74813989	20.3028	Intron (NM_001025100, Intron 2 of 3)	31254	4155	MBP	myelin basic protein
55.0466	chr20	8817834	8818843	12.1154	Intron (NM_182734, Intron 32 of 32)	6506	26767	RNU105B	RNA, U105B small nucleolar
54.9898	chr12	24872051	24873056	10.9362	Intergenic	-135451	144360	LINC00477	long intergenic non-protein coding RNA 477
54.9892	chr1	232550961	232551995	23.8465	Intron (NM_020808, Intron 16 of 20)	99876	57568	SIPA1L2	signal induced proliferation associated 1 like 2
54.9803	chr12	8379708	8381156	46.242	Promoter-TSS (NM_001319982)	-218	55138	FAM90A1	family with sequence similarity 90 member A1
54.9741	chr8	127845785	127846791	42.3099	Intergenic	-179111	100750225	PCAT1	prostate cancer associated transcript 1
54.9686	chr9	19999205	20000205	16.7466	Intergenic	-212688	25769	SLC24A2	solute carrier family 24 member 2
54.963	chr16	63226592	63227591	7.58185	Intergenic	-1156749	1006	CDH8	cadherin 8
54.883	chr4	141187775	141188824	25.5394	Intron (NM_032547, Intron 1 of 4)	9837	60592	SCOC	short coiled-coil protein
54.8631	chr9	67300970	67302022	35.9202	Non-coding (NR_160666, Exon 4 of 4)	11045	102724580	LOC102724580	methylenetetrahydrofolate dehydrogenase (NADP+ dependent) 1 like pseudogene
54.8355	chr1	33812256	33813255	17.8459	Intron (NM_198040, Intron 8 of 13)	2745	1912	PHC2	polyhomeotic homolog 2
54.8286	chr6	53918526	53919538	20.4744	Intron (NM_001281746, Intron 1 of 11)	-6640	100873951	MLIP-AS1	MLIP antisense RNA 1
54.7933	chr1	224685535	224686936	27.3543	Intron (NM_001322302, Intron 2 of 6)	63684	149111	CNIH3	cornichon family AMPA receptor auxiliary protein 3
54.731	chr5	93553702	93554833	20.298	Intron (NM_001145678, Intron 20 of 20)	-106863	83989	FAM172A	family with sequence similarity 172 member A
54.6296	chr1	95087973	95089715	22.8393	Non-coding (NR_160779, Exon 5 of 6)	79586	113219466	MIR12133	microRNA 12133
54.6246	chr5	125805817	125806985	10.5461	Intron (NR_146196, Intron 3 of 14)	5559	65983	GRAMD2B	GRAM domain containing 2B
54.6182	chr14	30662644	30663643	13.1238	Intergenic	-266090	5587	PRKD1	protein kinase D1
54.6083	chr6	74160182	74161181	17.1357	Intron (NM_138441, Intron 1 of 4)	1339	115004	CGAS	cyclic GMP-AMP synthase
54.5836	chr4	146222218	146223217	9.08424	Intergenic	38854	105377466	LINC02266	long intergenic non-protein coding RNA 2266
54.5691	chr17	15393596	15394676	21.3722	Intron (NM_001204478, Intron 5 of 6)	-19986	94145	CDRT3	CMT1A duplicated region transcript 3
54.5079	chr10	59451745	59452744	10.4474	Intergenic	-387925	100500834	MIR3924	microRNA 3924
54.4904	chr17	62334458	62335457	11.3546	Intron (NM_018469, Intron 1 of 11)	5663	55852	TEX2	testis expressed 2
54.4813	chr3	42105032	42106037	21.6738	Intergenic	-23158	22906	TRAK1	trafficking kinesin protein 1
54.3746	chr10	98750716	98751715	7.99521	3' UTR (NM_001346516, Exon 8 of 8)	-111298	100505540	SLIT1-AS1	SLIT1 antisense RNA 1
54.3087	chr4	37694742	37695743	14.2467	Intergenic	-7244	768211	RELL1	RELT like 1
54.2883	chr5	41526995	41528003	17.8543	Intergenic	-16796	345557	PLCXD3	phosphatidylinositol specific phospholipase C X domain containing 3
54.2603	chr11	64773979	64775022	59.0614	Intergenic	-7085	100528018	ARL2-SNX15	ARL2-SNX15 readthrough (NMD candidate)
54.2532	chr16	86805917	86807051	15.3511	Intergenic	50787	102724344	LINC02188	long intergenic non-protein coding RNA 2188
54.1992	chr17	15312646	15313645	10.9614	Intergenic	57790	284040	CDRT4	CMT1A duplicated region transcript 4
54.17	chr6	159284315	159285403	16.6297	Intergenic	-5987	100130967	C6orf99	chromosome 6 open reading frame 99
54.1583	chr17	40831424	40832424	33.869	Exon (NM_016602, Exon 2 of 2)	1937	2826	CCR10	C-C motif chemokine receptor 10
54.158	chr11	103399580	103400583	27.1823	Intergenic	-320553	100616457	MIR4693	microRNA 4693
54.1452	chr11	90891741	90892775	18.1169	Intergenic	-289888	100302228	MIR1261	microRNA 1261
54.1448	chr18	14558958	14560127	18.6335	Intergenic	-15943	388468	POTEC	POTE ankyrin domain family member C
54.1423	chr2	114041081	114042084	73.9102	Intergenic	-5084	7849	PAX8	paired box 8
54.1151	chr1	230463306	230464855	15.301	Intron (NM_001258311, Intron 5 of 6)	97998	79605	PGBD5	piggyBac transposable element derived 5
54.0885	chr11	108904045	108905053	23.1283	Intergenic	368753	1662	DDX10	DEAD-box helicase 10
54.0462	chr10	34845110	34846118	19.1366	Intron (NM_001184791, Intron 2 of 20)	258610	56288	PARD3	par-3 family cell polarity regulator
53.9982	chr4	107504420	107505447	10.4911	Intergenic	150152	105377355	LINC02173	long intergenic non-protein coding RNA 2173
53.9241	chr2	68270934	68271948	24.9746	Intron (NM_001190263, Intron 5 of 5)	18695	10438	C1D	C1D nuclear receptor corepressor
53.9028	chr12	371596	373447	19.9163	Promoter-TSS (NM_001190997)	-482	6540	SLC6A13	solute carrier family 6 member 13
53.902	chr9	36029458	36030457	10.7881	Intergenic	-6953	8434	RECK	reversion inducing cysteine rich protein with kazal motifs
53.8935	chr16	27472376	27473453	17.9595	Intron (NM_001520, Intron 36 of 36)	-8200	283888	IL21R-AS1	IL21R antisense RNA 1
53.8628	chr19	17190487	17191543	25.7764	Intron (NM_004145, Intron 1 of 39)	4428	4650	MYO9B	myosin IXB
53.8488	chr3	59803497	59804961	20.6182	Intron (NM_001354589, Intron 7 of 8)	-160006	339902	LOC339902	hCG1813818
53.8467	chr17	76147150	76148173	26.1502	Intron (NM_001163075, Intron 2 of 4)	5195	100141515	C17orf99	chromosome 17 open reading frame 99
53.8456	chr12	21810374	21811374	26.3697	Promoter-TSS (NM_001315537)	-85	3945	LDHB	lactate dehydrogenase B
53.8337	chr4	40996224	40997223	13.0234	Intron (NM_004307, Intron 6 of 17)	-137514	323	APBB2	amyloid beta precursor protein binding family B member 2
53.8022	chr15	71341044	71342052	9.44566	Intron (NM_017691, Intron 15 of 15)	-92240	79875	THSD4	thrombospondin type 1 domain containing 4
53.7877	chr15	58165782	58166781	7.93257	Intergenic	139940	8854	ALDH1A2	aldehyde dehydrogenase 1 family member A2
53.7616	chr14	49679065	49680068	15.2303	Intergenic	373532	6235	RPS29	ribosomal protein S29
53.7475	chr11	22453796	22454795	14.8626	Intergenic	59270	102723378	LINC01495	long intergenic non-protein coding RNA 1495
53.7459	chr15	95288344	95289343	6.11852	Intergenic	-109749	440311	LOC440311	NOP53 ribosome biogenesis factor pseudogene
53.7176	chrX	80020446	80021469	13.2295	Intron (NM_153252, Intron 6 of 40)	44419	254065	BRWD3	bromodomain and WD repeat domain containing 3
53.7012	chr11	114372363	114374194	13.4623	Intergenic	57325	120400	NXPE1	neurexophilin and PC-esterase domain family member 1
53.6656	chr12	6442397	6443428	29.7363	Exon (NM_001065, Exon 3 of 10)	8330	7132	TNFRSF1A	TNF receptor superfamily member 1A
53.6177	chr5	172285672	172286715	50.4348	Intron (NM_001031711, Intron 1 of 9)	24939	57222	ERGIC1	endoplasmic reticulum-golgi intermediate compartment 1
53.6171	chr16	48996906	48998789	22.985	Intergenic	317902	869	CBLN1	cerebellin 1 precursor
53.5851	chr8	1949056	1950082	17.1131	Exon (NM_014867, Exon 2 of 2)	27726	9920	KBTBD11	kelch repeat and BTB domain containing 11
53.5839	chr21	36696790	36697794	10.6479	Intergenic	255770	100506403	LOC100506403	uncharacterized LOC100506403
53.5806	chr3	192958566	192959566	25.3062	Promoter-TSS (NM_001366112)	55	57110	PLAAT1	phospholipase A and acyltransferase 1
53.5617	chr3	85719467	85720466	10.4532	Intron (NM_001256503, Intron 2 of 9)	-55666	253559	CADM2	cell adhesion molecule 2
53.552	chr11	58537973	58539589	24.0304	Intergenic	-39334	10249	GLYAT	glycine-N-acyltransferase
53.5494	chr4	10046837	10047838	19.0742	Intergenic	-5465	56606	SLC2A9	solute carrier family 2 member 9
53.5423	chr18	12278763	12279869	41.0549	Intergenic	24956	1149	CIDEA	cell death inducing DFFA like effector a
53.5329	chr1	46985839	46986840	26.3857	Intergenic	13668	127343	DMBX1	diencephalon/mesencephalon homeobox 1
53.5312	chr6	163385537	163386545	25.6454	Intron (NM_001080379, Intron 2 of 4)	89152	101929239	PACRG-AS2	PACRG antisense RNA 2
53.5227	chr6	56673444	56674476	56.9294	Intron (NM_001144769, Intron 4 of 96)	34503	667	DST	dystonin
53.4959	chr11	12921715	12922716	12.3548	Intron (NM_021961, Intron 9 of 12)	88880	100506305	LINC00958	long intergenic non-protein coding RNA 958
53.4137	chr8	70102584	70103583	10.6921	Intergenic	-86658	100505718	LINC01592	long intergenic non-protein coding RNA 1592
53.3953	chr19	38307469	38308468	12.9007	Promoter-TSS (NR_040013)	-83	644554	LOC644554	uncharacterized LOC644554
53.3936	chr12	22114896	22116055	12.6086	Intergenic	-25847	10060	ABCC9	ATP binding cassette subfamily C member 9
53.3716	chr3	117621720	117622719	7.81022	Intergenic	-212447	105374057	LINC02024	long intergenic non-protein coding RNA 2024
53.347	chr7	87264945	87265974	62.942	Intron (NM_001134405, Intron 1 of 10)	7745	154661	RUNDC3B	RUN domain containing 3B
53.3432	chr8	115952976	115953975	45.6868	Intergenic	726765	7227	TRPS1	transcriptional repressor GATA binding 1
53.333	chr19	1177426	1178455	17.5477	Intergenic	-3673	22904	SBNO2	strawberry notch homolog 2
53.3109	chr11	96839946	96840964	13.8689	Intergenic	598866	105369443	LINC02737	long intergenic non-protein coding RNA 2737
53.2691	chr1	249115091	249116099	42.1262	Intron (NM_001322462, Intron 1 of 8)	3970	80851	SH3BP5L	SH3 binding domain protein 5 like
53.2413	chr1	243761428	243762431	10.3751	Intron (NM_001370074, Intron 8 of 13)	244655	10000	AKT3	AKT serine/threonine kinase 3
53.223	chr9	134241760	134242864	12.8523	Intergenic	-63165	84726	PRRC2B	proline rich coiled-coil 2B
53.1338	chr1	59094330	59095329	7.27804	Intergenic	-51905	4070	TACSTD2	tumor associated calcium signal transducer 2
53.1138	chr8	69537332	69538340	16.0632	Intron (NR_146186, Intron 7 of 12)	-294110	286189	C8orf34-AS1	C8orf34 antisense RNA 1
53.0514	chr2	47261138	47262149	38.1711	Intron (NM_020458, Intron 15 of 19)	-92649	90411	MCFD2	multiple coagulation factor deficiency 2
53.0365	chr10	26775538	26777083	15.2509	Intron (NM_019043, Intron 2 of 14)	49040	54518	APBB1IP	amyloid beta precursor protein binding family B member 1 interacting protein
53.0268	chr7	87157721	87158721	68.6774	Intron (NM_001348946, Intron 21 of 27)	-53202	5244	ABCB4	ATP binding cassette subfamily B member 4
53.01	chr1	245850467	245851730	23.3674	Exon (NM_018012, Exon 12 of 15)	-453279	111216275	KIF26B-AS1	KIF26B antisense RNA 1
52.9405	chr5	64494300	64495322	21.3298	Intron (NR_135689, Intron 21 of 25)	282936	11174	ADAMTS6	ADAM metallopeptidase with thrombospondin type 1 motif 6
52.8775	chr8	63161131	63162440	27.1501	Intron (NM_001304533, Intron 1 of 6)	372	286183	NKAIN3	sodium/potassium transporting ATPase interacting 3
52.8566	chr17	36620621	36621724	24.6577	Intron (NM_001199417, Intron 6 of 23)	36464	57636	ARHGAP23	Rho GTPase activating protein 23
52.8339	chr5	152930748	152931790	31.855	Intron (NM_001258020, Intron 3 of 16)	59537	2890	GRIA1	glutamate ionotropic receptor AMPA type subunit 1
52.8195	chr4	143318379	143319378	11.2433	Intron (NM_001101669, Intron 7 of 25)	448810	8821	INPP4B	inositol polyphosphate-4-phosphatase type II B
52.7286	chr1	87691692	87692754	17.6176	Intron (NM_001290053, Intron 2 of 3)	13871	101927844	LINC02801	long intergenic non-protein coding RNA 2801
52.6859	chr19	16449039	16450077	22.6152	Intergenic	13921	10365	KLF2	Kruppel like factor 2
52.6853	chr15	30487563	30488887	13.8188	Promoter-TSS (NR_026771)	-14	26082	LINC02249	long intergenic non-protein coding RNA 2249
52.68	chr6	83007354	83008366	13.8594	Intergenic	-50399	25998	IBTK	inhibitor of Bruton tyrosine kinase
52.632	chr4	171307842	171308841	13.3118	Intergenic	160599	101928223	LINC01612	long intergenic non-protein coding RNA 1612
52.6089	chr1	93803674	93804676	16.0086	Non-coding (NR_034089, Exon 5 of 9)	7193	100131564	CCDC18-AS1	CCDC18 antisense RNA 1
52.5608	chr1	247802310	247803647	27.7224	Intergenic	33365	441933	OR13G1	olfactory receptor family 13 subfamily G member 1
52.499	chr7	22616866	22618720	24.522	Intergenic	14837	100506178	LOC100506178	uncharacterized LOC100506178
52.4881	chr3	134039334	134040333	18.2211	Non-coding (NR_146711, Exon 2 of 2)	7415	105374119	LINC02004	long intergenic non-protein coding RNA 2004
52.4862	chr8	49331842	49333741	26.9744	Intergenic	-131336	101929268	LOC101929268	uncharacterized LOC101929268
52.4347	chr10	42863006	42864061	25.076	Promoter-TSS (NR_024380)	-40	441666	LOC441666	zinc finger protein 91 pseudogene
52.429	chr8	56449530	56450615	20.7117	3' UTR (NM_052898, Exon 3 of 3)	-16535	105375843	LOC105375843	uncharacterized LOC105375843
52.3944	chr17	50141719	50142721	19.2597	Intron (NM_001082533, Intron 3 of 9)	93854	56934	CA10	carbonic anhydrase 10
52.3717	chr8	68652702	68653718	22.6612	Intron (NM_020361, Intron 1 of 10)	5385	57094	CPA6	carboxypeptidase A6
52.3691	chr11	12097750	12098763	22.8379	Intergenic	-33867	9645	MICAL2	microtubule associated monooxygenase, calponin and LIM domain containing 2
52.3247	chr7	55141281	55142281	24.7561	Intron (NM_001346941, Intron 1 of 21)	-35751	1956	EGFR	epidermal growth factor receptor
52.3099	chr3	53032884	53033917	37.1655	Intron (NM_016329, Intron 1 of 20)	46689	51460	SFMBT1	Scm like with four mbt domains 1
52.3069	chr14	68591598	68592598	23.7095	Intron (NM_001321817, Intron 8 of 11)	301789	5890	RAD51B	RAD51 paralog B
52.268	chr3	111521704	111522709	27.8641	Intron (NM_001185106, Intron 4 of 4)	-55821	90102	PHLDB2	pleckstrin homology like domain family B member 2
52.2577	chr9	83262950	83264671	18.6588	Intergenic	673872	101927477	LINC01507	long intergenic non-protein coding RNA 1507
52.2559	chr10	36569078	36570099	14.0782	Intergenic	502358	102578074	PCAT5	prostate cancer associated transcript 5
52.2449	chr11	29545307	29546306	7.70918	Intergenic	-70154	105376606	LINC02546	long intergenic non-protein coding RNA 2546
52.2365	chr1	33898951	33899950	13.9966	Intergenic	-38796	7579	ZSCAN20	zinc finger and SCAN domain containing 20
52.2346	chr8	122709302	122710315	37.95	Intergenic	-56128	3037	HAS2	hyaluronan synthase 2
52.2055	chr5	113390684	113391683	9.88064	Intergenic	-306584	3781	KCNN2	potassium calcium-activated channel subfamily N member 2
52.1945	chr6	150486704	150487772	12.4526	Intron (NM_030949, Intron 1 of 3)	23058	81706	PPP1R14C	protein phosphatase 1 regulatory inhibitor subunit 14C
52.1856	chr7	83671078	83672259	20.4411	Intron (NM_006080, Intron 6 of 16)	152437	10371	SEMA3A	semaphorin 3A
52.1667	chr8	49228727	49229886	22.134	Intergenic	-234821	101929268	LOC101929268	uncharacterized LOC101929268
52.1456	chr9	72596301	72597303	9.84474	Intergenic	-61695	256691	MAMDC2	MAM domain containing 2
52.0994	chr11	116881596	116882609	28.6586	Intron (NM_025164, Intron 1 of 23)	87042	23387	SIK3	SIK family kinase 3
52.0485	chr20	11176651	11177650	9.28624	Intergenic	76881	339593	LOC339593	uncharacterized LOC339593
51.9913	chr2	196066610	196067609	8.45525	Intergenic	-454573	57181	SLC39A10	solute carrier family 39 member 10
51.9704	chr4	71780808	71781807	13.6361	Intron (NM_173468, Intron 1 of 5)	13221	92597	MOB1B	MOB kinase activator 1B
51.9294	chr6	14270953	14272004	31.2629	Intergenic	14207	102216342	LINC01108	long intergenic non-protein coding RNA 1108
51.9037	chr3	49415304	49416304	27.7372	Intron (NM_001313943, Intron 1 of 5)	-19771	2876	GPX1	glutathione peroxidase 1
51.8831	chr8	8945658	8946901	14.4644	Intron (NM_001354638, Intron 7 of 7)	-30139	109616996	SNORD3I	small nucleolar RNA, C/D box 3I
51.8714	chr9	2559154	2560160	23.311	Intron (NR_015375, Intron 1 of 3)	-62130	7436	VLDLR	very low density lipoprotein receptor
51.833	chr8	43414197	43415216	26.8096	Intergenic	267121	340441	POTEA	POTE ankyrin domain family member A
51.8317	chr3	152939190	152940270	10.0651	Intergenic	59715	5912	RAP2B	RAP2B, member of RAS oncogene family
51.8284	chrX	94313555	94314554	7.62758	Intergenic	4171	100313772	MIR548M	microRNA 548m
51.7864	chr15	102285475	102286493	14.9774	Promoter-TSS (NM_001321552)	-43	100128108	LOC100128108	putative ubiquitin-conjugating enzyme E2Q2-like protein
51.6905	chr3	156323088	156324098	15.3587	Intergenic	-50604	6747	SSR3	signal sequence receptor subunit 3
51.6105	chr5	168587663	168588853	49.4363	Intron (NM_001271946, Intron 4 of 35)	102440	693170	MIR585	microRNA 585
51.6078	chr7	84654219	84655504	74.5777	Intron (NM_152754, Intron 10 of 16)	96386	223117	SEMA3D	semaphorin 3D
51.6029	chr17	70334919	70335923	26.1996	Intergenic	-3531	146795	LINC02003	long intergenic non-protein coding RNA 2003
51.5982	chr11	94245279	94246278	7.59199	Exon (NM_001190462, Exon 1 of 4)	151	643037	C11orf97	chromosome 11 open reading frame 97
51.5486	chr12	32973908	32974955	9.58501	Exon (NM_004572, Exon 10 of 14)	-65600	51067	YARS2	tyrosyl-tRNA synthetase 2
51.4819	chr1	94158517	94159516	24.8074	Intron (NM_001261408, Intron 3 of 13)	-11623	8412	BCAR3	BCAR3 adaptor protein, NSP family member
51.4586	chr5	167744392	167745395	25.3526	Intron (NM_001161662, Intron 1 of 22)	26243	23286	WWC1	WW and C2 domain containing 1
51.4385	chr11	87136591	87137590	18.1335	Intergenic	293213	105369423	LINC02711	long intergenic non-protein coding RNA 2711
51.4332	chr1	16415220	16416232	13.3885	Intergenic	-15580	348487	FAM131C	family with sequence similarity 131 member C
51.4185	chr1	98791306	98792368	22.353	Intergenic	115570	729987	LINC01776	long intergenic non-protein coding RNA 1776
51.4107	chr11	92435669	92436668	10.2985	Intron (NM_001008781, Intron 3 of 24)	212626	105369431	LINC02746	long intergenic non-protein coding RNA 2746
51.3986	chr1	242113393	242114392	12.2057	Intergenic	-7177	441925	BECN2	beclin 2
51.3382	chr4	6955342	6956346	17.7617	Promoter-TSS (NM_001330638)	-49	57533	TBC1D14	TBC1 domain family member 14
51.3292	chr11	128327846	128328958	14.9743	TTS (NM_001330451)	63803	2113	ETS1	ETS proto-oncogene 1, transcription factor
51.2874	chr20	59760647	59761950	39.7843	Intergenic	-66019	1002	CDH4	cadherin 4
51.2739	chr6	89744954	89745971	32.8945	Intergenic	-45008	10957	PNRC1	proline rich nuclear receptor coactivator 1
51.2485	chr15	31763708	31764770	11.9966	Intergenic	145201	51621	KLF13	Kruppel like factor 13
51.211	chr14	93706391	93707390	17.765	3' UTR (NM_001289133, Exon 9 of 9)	33289	55148	UBR7	ubiquitin protein ligase E3 component n-recognin 7 (putative)
51.1917	chr5	9131394	9132394	12.7469	Intron (NM_003966, Intron 13 of 22)	-77887	100616326	MIR4636	microRNA 4636
51.1708	chr2	119989249	119990254	13.5366	Intron (NM_182915, Intron 2 of 5)	8341	55240	STEAP3	STEAP3 metalloreductase
51.1442	chr20	43689604	43690608	14.992	Intron (NM_001352385, Intron 11 of 11)	39662	3787	KCNS1	potassium voltage-gated channel modifier subfamily S member 1
51.0939	chr12	30947724	30948744	53.1087	Promoter-TSS (NR_040245)	-381	100287314	LINC00941	long intergenic non-protein coding RNA 941
51.0788	chr11	89509999	89511027	17.7305	Intergenic	31230	57093	TRIM49	tripartite motif containing 49
51.0714	chr14	62416658	62417671	13.3104	Intron (NM_001367663, Intron 1 of 7)	22751	83851	SYT16	synaptotagmin 16
50.9904	chr18	4454849	4455848	10.1717	Promoter-TSS (NM_004746)	-41	9229	DLGAP1	DLG associated protein 1
50.9492	chr9	69662843	69663848	41.6764	Non-coding (NR_024443, Exon 4 of 4)	11193	101929583	LOC101929583	methylenetetrahydrofolate dehydrogenase (NADP+ dependent) 1 like pseudogene
50.9229	chr8	52090820	52091842	20.4488	Intergenic	630674	137902	PXDNL	peroxidasin like
50.9054	chr14	52104630	52105633	46.4987	Intron (NM_001042481, Intron 2 of 14)	13331	145438	FRMD6-AS1	FRMD6 antisense RNA 1
50.8762	chr11	26100829	26101828	9.63609	Intergenic	-109342	63982	ANO3	anoctamin 3
50.8467	chr10	10827658	10828663	39.368	Intron (NR_027082, Intron 3 of 3)	8717	207107	SFTA1P	surfactant associated 1, pseudogene
50.8084	chr4	14843131	14844186	10.7781	Intron (NR_126435, Intron 2 of 6)	46135	201853	LINC00504	long intergenic non-protein coding RNA 504
50.7959	chr14	22626645	22627705	9.57073	Intergenic	274570	105370401	LOC105370401	uncharacterized LOC105370401
50.7869	chr1	55369912	55370952	18.4499	Intergenic	-17564	1718	DHCR24	24-dehydrocholesterol reductase
50.7272	chr4	135668380	135669379	6.98122	Intergenic	323856	105377434	LINC02462	long intergenic non-protein coding RNA 2462
50.7054	chr1	245424862	245425871	21.1789	Intron (NM_018012, Intron 2 of 14)	-27547	111216275	KIF26B-AS1	KIF26B antisense RNA 1
50.6965	chr10	7839111	7840118	11.9225	Intron (NM_001001973, Intron 3 of 9)	9474	509	ATP5F1C	ATP synthase F1 subunit gamma
50.6508	chr12	25016950	25017949	9.11789	Intron (NM_001178092, Intron 3 of 8)	37707	586	BCAT1	branched chain amino acid transaminase 1
50.6379	chr11	14279404	14280405	16.9564	Intron (NM_006108, Intron 12 of 16)	100127	22800	RRAS2	RAS related 2
50.6065	chr11	86458008	86459075	23.7494	Intergenic	-43572	11098	PRSS23	serine protease 23
50.5655	chr6	88619228	88620231	11.6856	Intron (NR_110869, Intron 3 of 4)	125151	101928911	LOC101928911	uncharacterized LOC101928911
50.5252	chr17	20434968	20435999	19.7635	Intergenic	-27672	644945	KRT16P3	keratin 16 pseudogene 3
50.5148	chr4	9521848	9522850	13.239	Intergenic	35588	100302277	MIR548I2	microRNA 548i-2
50.5049	chr14	90116616	90117785	22.1292	Intergenic	-31691	1112	FOXN3	forkhead box N3
50.4791	chr4	6481955	6482954	9.94724	Intron (NM_001206995, Intron 2 of 9)	-8113	5522	PPP2R2C	protein phosphatase 2 regulatory subunit Bgamma
50.389	chr8	73225763	73226762	12.2029	Intergenic	-62393	392232	LOC392232	transient receptor potential cation channel subfamily A member 1 pseudogene
50.3821	chr8	32521494	32522502	10.3529	Intron (NM_001322205, Intron 1 of 8)	17390	3084	NRG1	neuregulin 1
50.3803	chr19	12163267	12164316	16.6477	Promoter-TSS (NM_001080404)	-15	729747	ZNF878	zinc finger protein 878
50.3602	chr19	38345535	38346534	20.1498	Promoter-TSS (NR_040015)	-198	100631378	LOC100631378	uncharacterized 100631378
50.3397	chr2	100483801	100484845	14.9457	Intron (NM_002285, Intron 6 of 23)	237722	3899	AFF3	AF4/FMR2 family member 3
50.3077	chr6	105152662	105153661	7.41721	Intergenic	154260	57531	HACE1	HECT domain and ankyrin repeat containing E3 ubiquitin protein ligase 1
50.2729	chr1	98464605	98465604	9.94872	Intron (NR_046105, Intron 3 of 4)	45803	100616452	MIR2682	microRNA 2682
50.2558	chr7	87120607	87121606	85.6787	Intergenic	-16087	5244	ABCB4	ATP binding cassette subfamily B member 4
50.2367	chr2	96099904	96100966	91.8715	Intergenic	31979	51011	FAHD2A	fumarylacetoacetate hydrolase domain containing 2A
50.1977	chr11	13236407	13237406	10.0166	Intergenic	-61293	406	ARNTL	aryl hydrocarbon receptor nuclear translocator like
50.1968	chr8	2215754	2216795	56.3757	Intergenic	191605	102465695	MIR7160	microRNA 7160
50.1911	chr2	67516789	67517788	14.1691	TTS (NR_110564)	-74837	644838	LINC01829	long intergenic non-protein coding RNA 1829
50.1575	chr9	107889108	107890107	15.288	Intergenic	-117279	23446	SLC44A1	solute carrier family 44 member 1
50.1566	chr6	133228760	133229759	9.52306	Intergenic	90901	594839	SNORA33	small nucleolar RNA, H/ACA box 33
50.1505	chr1	42179012	42180011	7.85707	Intron (NM_024503, Intron 1 of 8)	205082	59269	HIVEP3	human immunodeficiency virus type I enhancer binding protein 3
50.0786	chr19	38551663	38552662	10.5353	Intron (NM_015073, Intron 2 of 21)	-101574	109623473	SNORD152	small nucleolar RNA, C/D box 152
50.0556	chr10	2249900	2250963	19.8967	Intergenic	106837	399708	LINC00701	long intergenic non-protein coding RNA 701
50.0508	chr13	106808266	106809265	10.5593	Intergenic	-220147	728192	LINC00460	long intergenic non-protein coding RNA 460
50.0374	chr1	23336869	23337885	12.0067	TTS (NM_001242521)	4968	729059	TEX46	testis expressed 46
50.0269	chr3	97869781	97870780	7.36747	Intergenic	2050	403273	OR5H14	olfactory receptor family 5 subfamily H member 14
50.001	chr4	21114805	21115832	19.4549	Intron (NM_147182, Intron 2 of 8)	-129686	80333	KCNIP4	potassium voltage-gated channel interacting protein 4
49.9837	chr18	20959733	20960916	15.4685	Intron (NR_148385, Intron 4 of 13)	57601	85019	TMEM241	transmembrane protein 241
49.9742	chr2	174982595	174983594	13.2911	Intron (NM_001011708, Intron 6 of 9)	93086	100128905	LINC01960	long intergenic non-protein coding RNA 1960
49.8992	chr16	55910417	55911442	10.2389	Intron (NM_001190158, Intron 2 of 13)	-1644	221223	CES5A	carboxylesterase 5A
49.8758	chr8	11337007	11338033	16.5625	Intergenic	-13258	83648	FAM167A	family with sequence similarity 167 member A
49.8411	chr13	84624612	84625615	20.3563	Intergenic	-89624	100874128	LINC00333	long intergenic non-protein coding RNA 333
49.8075	chr14	50449056	50450055	12.5954	Intron (NR_126498, Intron 3 of 3)	10297	283551	LINC01588	long intergenic non-protein coding RNA 1588
49.8039	chr6	1523893	1524918	18.8476	Intergenic	-81361	101927703	FOXCUT	FOXC1 upstream transcript
49.7745	chr17	73152355	73153354	20.2768	Intergenic	-2076	51155	JPT1	Jupiter microtubule associated homolog 1
49.7667	chr1	106436297	106437299	8.89876	Intergenic	134077	105378884	LINC01677	long intergenic non-protein coding RNA 1677
49.7363	chr6	162477363	162478444	15.9843	Intron (NM_004562, Intron 4 of 11)	585894	105378098	LOC105378098	uncharacterized LOC105378098
49.7211	chr9	77101350	77103049	9.54002	Intron (NR_125791, Intron 1 of 4)	-10052	6096	RORB	RAR related orphan receptor B
49.6843	chr3	159572020	159573154	25.3405	Intron (NM_001197109, Intron 1 of 6)	14937	29970	SCHIP1	schwannomin interacting protein 1
49.6586	chr2	31606906	31608347	21.1842	Intron (NM_000379, Intron 9 of 35)	29982	7498	XDH	xanthine dehydrogenase
49.6249	chr11	123560853	123561852	6.99302	Intergenic	-36037	55800	SCN3B	sodium voltage-gated channel beta subunit 3
49.5929	chr1	82168250	82169249	13.0354	Intron (NM_001366003, Intron 5 of 27)	3294	23266	ADGRL2	adhesion G protein-coupled receptor L2
49.5745	chr6	81163721	81164732	39.7024	Intergenic	347838	594	BCKDHB	branched chain keto acid dehydrogenase E1 subunit beta
49.5693	chr8	126667423	126668432	97.3011	Intergenic	223476	10221	TRIB1	tribbles pseudokinase 1
49.5333	chr2	177178142	177179141	9.95577	Intron (NM_006554, Intron 3 of 9)	44471	10651	MTX2	metaxin 2
49.4842	chr6	73789026	73790025	11.3066	Intron (NM_001160134, Intron 5 of 11)	63712	100873997	KCNQ5-AS1	KCNQ5 antisense RNA 1
49.4518	chr12	3563132	3564133	47.3654	Intron (NM_001256536, Intron 1 of 9)	-36737	56341	PRMT8	protein arginine methyltransferase 8
49.4254	chr5	157194737	157195743	20.8157	Intergenic	24520	134353	LSM11	LSM11, U7 small nuclear RNA associated
49.3938	chr4	24925636	24926635	13.5262	Intron (NM_173463, Intron 1 of 12)	-11535	91050	CCDC149	coiled-coil domain containing 149
49.3844	chr5	149415703	149416814	24.1428	Exon (NM_014983, Exon 12 of 20)	35956	22993	HMGXB3	HMG-box containing 3
49.3766	chr11	17808064	17809065	20.2781	Intergenic	51069	3746	KCNC1	potassium voltage-gated channel subfamily C member 1
49.3704	chr8	131244762	131245762	32.2678	Intron (NM_018482, Intron 4 of 29)	63517	29065	ASAP1-IT1	ASAP1 Intronic transcript 1
49.3685	chr14	43211764	43212763	11.8847	Intergenic	1136204	145581	LRFN5	leucine rich repeat and fibronectin type III domain containing 5
49.3658	chr9	112777695	112779313	13.2431	Intron (NM_007203, Intron 7 of 10)	-32374	445815	PALM2-AKAP2	PALM2-AKAP2 fusion
49.3513	chr8	101800798	101801863	27.502	Intergenic	-67014	26986	PABPC1	poly(A) binding protein cytoplasmic 1
49.3177	chr2	105856007	105857100	28.2054	Intergenic	-1647	11250	GPR45	G protein-coupled receptor 45
49.2947	chr2	524215	525223	18.0527	Intergenic	-21086	101927362	LINC01875	long intergenic non-protein coding RNA 1875
49.2942	chr5	172167513	172168526	15.3332	Intergenic	-14487	101928093	LOC101928093	uncharacterized LOC101928093
49.2928	chr2	243005668	243006667	9.68084	Intron (NR_146651, Intron 1 of 3)	20122	105373979	LINC01880	long intergenic non-protein coding RNA 1880
49.2892	chr2	242907701	242908989	12.265	Intron (NR_110220, Intron 3 of 3)	-4489	102723927	LINC01238	long intergenic non-protein coding RNA 1238
49.2886	chr9	90214388	90215420	16.5752	Intron (NM_001288729, Intron 2 of 25)	46535	100506897	DAPK1-IT1	DAPK1 Intronic transcript 1
49.285	chr15	33162356	33163355	9.35179	Intron (NM_001103184, Intron 12 of 16)	-151789	100131315	LOC100131315	uncharacterized LOC100131315
49.2707	chr15	40600287	40601291	16.9438	Promoter-TSS (NM_001284297)	-653	5330	PLCB2	phospholipase C beta 2
49.2607	chr1	53914366	53915366	14.138	Intergenic	-9173	163742	SLC25A3P1	solute carrier family 25 member 3 pseudogene 1
49.25	chr14	29789128	29790127	9.85147	Intergenic	-534634	105370424	LINC02282	long intergenic non-protein coding RNA 2282
49.2406	chr4	165304238	165305313	26.9764	Promoter-TSS (NM_001166373)	-368	55016	MARCH1	membrane associated ring-CH-type finger 1
49.2249	chr22	27857120	27858127	17.1666	Intergenic	151011	100507657	LINC02554	long intergenic non-protein coding RNA 2554
49.1953	chr16	14457273	14459115	30.4549	Intron (NR_131191, Intron 1 of 1)	5929	105447648	LINC02130	long intergenic non-protein coding RNA 2130
49.1894	chr3	29106572	29107656	15.7476	Intergenic	215316	100873979	RBMS3-AS3	RBMS3 antisense RNA 3
49.124	chr2	105382689	105383704	19.3374	Intergenic	-9019	284998	LINC01114	long intergenic non-protein coding RNA 1114
49.1202	chr8	73924298	73925303	27.3409	Intron (NM_017489, Intron 1 of 9)	3701	7013	TERF1	telomeric repeat binding factor 1
49.1191	chr14	52076312	52077311	10.0603	Intron (NM_001042481, Intron 2 of 14)	-10141	100874185	FRMD6-AS2	FRMD6 antisense RNA 2
49.1067	chr4	15453373	15454375	21.5369	Intergenic	-17615	57545	CC2D2A	coiled-coil and C2 domain containing 2A
49.0969	chr4	80205523	80206522	7.8031	Intron (NR_038342, Intron 4 of 5)	41193	84779	NAA11	N(alpha)-acetyltransferase 11, NatA catalytic subunit
49.0945	chr15	89644779	89645792	22.5604	Intron (NM_007011, Intron 2 of 14)	13598	11057	ABHD2	abhydrolase domain containing 2
49.0894	chr12	110691350	110692357	18.7288	Intergenic	-27199	488	ATP2A2	ATPase sarcoplasmic/endoplasmic reticulum Ca2+ transporting 2
49.0587	chr14	65887841	65889049	25.3857	Intron (NR_038170, Intron 1 of 10)	8997	2530	FUT8	fucosyltransferase 8
49.0558	chr2	123098075	123099098	17.8651	Intergenic	585359	7247	TSN	translin
49.0436	chr6	3797571	3799139	17.5809	Intergenic	-46109	221749	PXDC1	PX domain containing 1
49.0347	chr6	5151752	5152756	21.2393	Intron (NM_001164841, Intron 2 of 3)	-3698	100500900	MIR3691	microRNA 3691
49.0002	chr4	78500250	78501260	21.949	Intron (NM_006419, Intron 1 of 4)	67848	10563	CXCL13	C-X-C motif chemokine ligand 13
48.9979	chr10	8188321	8189320	8.25081	Intergenic	92169	2625	GATA3	GATA binding protein 3
48.9644	chr4	6807920	6808919	7.72856	Intron (NM_014743, Intron 2 of 9)	23960	9778	KIAA0232	KIAA0232
48.9408	chr2	109787513	109788598	21.999	Intron (NM_001099289, Intron 1 of 9)	-30011	100422863	MIR4265	microRNA 4265
48.9362	chr1	246590560	246592511	29.8459	Intron (NM_001167740, Intron 1 of 11)	-10821	64754	SMYD3	SET and MYND domain containing 3
48.9317	chrX	106805449	106806450	17.4665	Intron (NM_032428, Intron 11 of 15)	-16898	100874122	FRMPD3-AS1	FRMPD3 antisense RNA 1
48.9173	chr4	183995505	183996554	18.6213	Intergenic	24323	152641	WWC2-AS2	WWC2 antisense RNA 2
48.9068	chr19	57018594	57019635	30.1729	Promoter-TSS (NM_020813)	-110	57573	ZNF471	zinc finger protein 471
48.9068	chr9	34637261	34638322	23.2271	Promoter-TSS (NM_001282207)	-7	10280	SIGMAR1	sigma non-opioid intracellular receptor 1
48.883	chr18	4796660	4797659	8.26882	Intergenic	-284022	105371969	LINC01892	long intergenic non-protein coding RNA 1892
48.8808	chr7	84652071	84653078	64.3122	Intron (NM_152754, Intron 10 of 16)	98673	223117	SEMA3D	semaphorin 3D
48.867	chr3	45126336	45127379	10.796	3' UTR (NM_022842, Exon 9 of 9)	55222	7123	CLEC3B	C-type lectin domain family 3 member B
48.8534	chr6	1702005	1703007	19.1496	Intron (NM_001253846, Intron 9 of 10)	92356	2296	FOXC1	forkhead box C1
48.824	chr1	225923052	225924189	22.9894	Intergenic	-41895	6726	SRP9	signal recognition particle 9
48.8235	chr8	74491174	74492173	15.7824	Intron (NM_001164384, Intron 10 of 10)	159364	100128126	STAU2-AS1	STAU2 antisense RNA 1
48.8133	chr1	159567708	159568766	20.9839	Intergenic	10621	325	APCS	amyloid P component, serum
48.8118	chr21	17960406	17961408	19.4949	Promoter-TSS (NR_136548)	-11	388815	MIR99AHG	mir-99a-let-7c cluster host gene
48.8072	chr2	121775936	121776935	53.0841	Intergenic	226578	2736	GLI2	GLI family zinc finger 2
48.7912	chr6	104430892	104432407	8.6106	Intergenic	875772	57531	HACE1	HECT domain and ankyrin repeat containing E3 ubiquitin protein ligase 1
48.7909	chr17	41545742	41546747	36.6795	Intergenic	-14989	1659	DHX8	DEAH-box helicase 8
48.7902	chr12	56590536	56591537	20.516	Intergenic	-7769	6601	SMARCC2	SWI/SNF related, matrix associated, actin dependent regulator of chromatin subfamily c member 2
48.7859	chr12	54616058	54617057	15.601	Intergenic	8703	100616400	MIR3198-2	microRNA 3198-2
48.7565	chr19	24140075	24141110	30.6781	Non-coding (NR_149007, Exon 1 of 3)	163	100505851	LOC100505851	uncharacterized LOC100505851
48.755	chr12	60322560	60323569	13.9663	Intergenic	239913	9194	SLC16A7	solute carrier family 16 member 7
48.7548	chr14	62795800	62796809	20.3235	Intergenic	-189613	101954204	LINC00644	long intergenic non-protein coding RNA 644
48.742	chr11	87183908	87184958	19.785	Intergenic	245870	105369423	LINC02711	long intergenic non-protein coding RNA 2711
48.736	chr6	64513846	64514975	19.0599	Intron (NM_001292009, Intron 37 of 43)	-2319	112935969	SCAT8	S-phase cancer associated transcript 8
48.7337	chr1	233248408	233249419	51.4947	Intron (NM_014801, Intron 21 of 33)	162325	84284	NTPCR	nucleoside-triphosphatase, cancer-related
48.7213	chr8	130527510	130528536	27.5221	Intron (NR_130917, Intron 1 of 3)	-31635	100500839	MIR3686	microRNA 3686
48.714	chr11	58393196	58394236	21.2373	TTS (NM_000614)	3578	1270	CNTF	ciliary neurotrophic factor
48.6957	chr14	51386952	51387978	13.9711	Intron (NM_002863, Intron 6 of 19)	23736	5836	PYGL	glycogen phosphorylase L
48.6826	chr7	87092593	87093592	71.3535	Intron (NM_000443, Intron 3 of 27)	11904	5244	ABCB4	ATP binding cassette subfamily B member 4
48.6771	chr21	14819813	14820835	9.03973	Intergenic	-41543	100423018	MIR3156-3	microRNA 3156-3
48.6539	chr6	148913844	148914843	9.24333	Intergenic	84056	23328	SASH1	SAM and SH3 domain containing 1
48.6522	chr16	67197076	67198081	44.1882	Promoter-TSS (NM_001538)	-86	3299	HSF4	heat shock transcription factor 4
48.6517	chr11	94156376	94157395	28.6038	Intron (NM_005590, Intron 18 of 18)	-22300	10888	GPR83	G protein-coupled receptor 83
48.5892	chr6	15290482	15291550	18.3975	Intron (NM_001267040, Intron 1 of 17)	41930	3720	JARID2	jumonji and AT-rich interaction domain containing 2
48.5558	chr2	106593468	106594475	25.9762	Intergenic	-88173	84417	ECRG4	ECRG4 augurin precursor
48.5138	chr9	69775004	69776026	62.2944	Intergenic	-17731	101928381	LOC101928381	uncharacterized LOC101928381
48.496	chr3	41752085	41753084	12.2741	Intron (NM_001322501, Intron 24 of 35)	251011	54986	ULK4	unc-51 like kinase 4
48.4714	chr13	80510471	80511477	26.1229	Intergenic	64253	101927195	LINC00382	long intergenic non-protein coding RNA 382
48.4508	chr2	56219337	56220386	11.6579	Intron (NR_126406, Intron 2 of 2)	-3667	406998	MIR216A	microRNA 216a
48.4507	chr3	65387930	65388991	11.2916	Intron (NM_001033057, Intron 12 of 22)	-491031	100873983	MAGI1-AS1	MAGI1 antisense RNA 1
48.4356	chr6	114337999	114338999	24.9893	Intron (NR_125845, Intron 4 of 9)	45542	222537	HS3ST5	heparan sulfate-glucosamine 3-sulfotransferase 5
48.4191	chr6	128556399	128557398	9.17968	Intron (NM_001291981, Intron 5 of 32)	207888	101928140	LOC101928140	uncharacterized LOC101928140
48.3953	chr2	216564933	216565932	15.603	Intron (NR_037195, Intron 5 of 9)	-17334	105373869	LINC01614	long intergenic non-protein coding RNA 1614
48.3802	chr2	32747250	32748550	10.9587	Intron (NM_016252, Intron 57 of 73)	-9320	693143	MIR558	microRNA 558
48.3737	chr8	67031792	67032791	19.6313	Intergenic	-7073	84675	TRIM55	tripartite motif containing 55
48.3736	chr4	23386042	23387041	4.57566	Intergenic	496374	10891	PPARGC1A	PPARG coactivator 1 alpha
48.3608	chr10	24162329	24163328	7.83939	Intron (NM_001098500, Intron 1 of 18)	179172	56243	KIAA1217	KIAA1217
48.3574	chr8	78109052	78110060	12.1218	Intergenic	-196276	5828	PEX2	peroxisomal biogenesis factor 2
48.3325	chr15	98418399	98419424	13.6875	Intergenic	-1252	91948	LINC00923	long intergenic non-protein coding RNA 923
48.3304	chr7	141062032	141063033	24.6719	Intron (NM_001195278, Intron 2 of 3)	-188678	55750	AGK	acylglycerol kinase
48.3257	chr14	20730532	20731572	17.422	Intergenic	20101	390442	OR11H4	olfactory receptor family 11 subfamily H member 4
48.2915	chr5	172883494	172884501	35.3591	Intergenic	109539	102465862	MIR8056	microRNA 8056
48.2834	chr12	30570195	30571243	24.4551	Intergenic	259459	10526	IPO8	importin 8
48.2754	chr7	87331291	87332300	203.06	Intron (NM_001348945, Intron 1 of 31)	10844	5243	ABCB1	ATP binding cassette subfamily B member 1
48.2349	chr5	165359007	165360006	9.29757	Intergenic	993869	102557615	LINC01947	long intergenic non-protein coding RNA 1947
48.234	chr5	57120641	57121680	18.5451	Intergenic	73829	101928539	LINC02225	long intergenic non-protein coding RNA 2225
48.2175	chr4	73071187	73072186	11.3854	Intergenic	166837	10886	NPFFR2	neuropeptide FF receptor 2
48.2102	chr1	78340177	78341176	7.73572	Exon (NM_001270384, Exon 16 of 16)	-13524	91624	NEXN	nexilin F-actin binding protein
48.1065	chr2	139755075	139756106	9.62552	Intergenic	100696	647012	YY1P2	YY1 transcription factor pseudogene 2
48.0856	chr10	91675936	91676935	7.60362	Non-coding (NR_110655, Exon 4 of 4)	28544	105378425	LINC01374	long intergenic non-protein coding RNA 1374
48.0533	chr13	72865045	72866141	18.0205	Intergenic	-424251	1602	DACH1	dachshund family transcription factor 1
48.0414	chr15	26273152	26274151	9.63649	Intron (NR_040082, Intron 2 of 4)	-87309	503519	LINC00929	long intergenic non-protein coding RNA 929
48.0269	chr12	65930485	65931493	31.1056	Intron (NR_120431, Intron 2 of 3)	20102	105369187	LOC105369187	uncharacterized LOC105369187
48.0041	chr10	4037228	4038227	12.1522	Intergenic	4375	102464829	MIR6078	microRNA 6078
47.9705	chr2	234330364	234331519	16.1103	Intron (NM_152879, Intron 3 of 29)	34141	8527	DGKD	diacylglycerol kinase delta
47.9519	chr3	127494184	127495241	23.4323	Intron (NM_001003794, Intron 3 of 7)	47013	11343	MGLL	monoglyceride lipase
47.9113	chr14	36646358	36647360	22.2135	Intergenic	-1002	100886964	PTCSC3	papillary thyroid carcinoma susceptibility candidate 3
47.8997	chr2	112028889	112029895	25.0199	Intron (NR_136163, Intron 3 of 6)	49271	100616341	MIR4435-2	microRNA 4435-2
47.8941	chr3	60279560	60280593	15.1399	Intron (NM_001354589, Intron 5 of 8)	-213441	2272	FHIT	fragile histidine triad diadenosine triphosphatase
47.8904	chr6	75307983	75309093	18.4534	Intron (NR_110856, Intron 2 of 3)	529371	101928516	LOC101928516	uncharacterized LOC101928516
47.8773	chr6	58524321	58525320	11.0879	Intergenic	-237096	106660612	LINC00680	long intergenic non-protein coding RNA 680
47.8509	chr4	22192130	22193225	12.022	Intergenic	148612	100505912	LOC100505912	uncharacterized LOC100505912
47.829	chr8	120591555	120592554	20.3182	Intron (NM_001330600, Intron 19 of 25)	13194	5168	ENPP2	ectonucleotide pyrophosphatase/phosphodiesterase 2
47.8253	chr9	81628284	81629288	13.9175	Intergenic	131795	101927450	LOC101927450	uncharacterized LOC101927450
47.8181	chr8	141248069	141249099	27.4983	Intron (NM_001160372, Intron 16 of 22)	-137950	359809	PEG13	paternally expressed 13
47.7944	chr11	5385176	5386184	12.6169	Intron (NM_001005567, Intron 1 of 4)	12942	390058	OR51B6	olfactory receptor family 51 subfamily B member 6
47.7885	chr3	112109812	112110818	23.6471	Intergenic	58312	4345	CD200	CD200 molecule
47.7794	chr17	44804608	44805678	12.0786	Intron (NR_040116, Intron 15 of 19)	90915	7473	WNT3	Wnt family member 3
47.767	chr6	64706788	64707864	23.8178	Intron (NM_001292009, Intron 34 of 43)	190597	112935969	SCAT8	S-phase cancer associated transcript 8
47.7639	chr12	109226289	109227833	44.6795	Intron (NM_018984, Intron 2 of 14)	3721	693204	MIR619	microRNA 619
47.7578	chr12	291415	292438	22.7627	Intergenic	-20885	101929384	LOC101929384	uncharacterized LOC101929384
47.6188	chr8	65396677	65397676	9.93393	Intergenic	92644	401463	LOC401463	uncharacterized LOC401463
47.6074	chr4	41258346	41259931	15.4966	Promoter-TSS (NR_102709)	193	7345	UCHL1	ubiquitin C-terminal hydrolase L1
47.5775	chr3	127517982	127518998	32.8802	Intron (NM_001003794, Intron 2 of 7)	23235	11343	MGLL	monoglyceride lipase
47.5746	chr21	46470612	46471617	26.8388	Intergenic	22012	728039	SSR4P1	signal sequence receptor subunit 4 pseudogene 1
47.5664	chr1	95392201	95393339	22.4267	Promoter-TSS (NM_001286055)	9	1266	CNN3	calponin 3
47.5457	chr4	145216114	145217113	16.0267	Intergenic	-154742	2993	GYPA	glycophorin A (MNS blood group)
47.4972	chr13	98666692	98667704	7.13302	Intron (NM_002271, Intron 22 of 28)	61269	3843	IPO5	importin 5
47.4517	chr16	64474110	64475112	10.2772	Intergenic	681355	1009	CDH11	cadherin 11
47.449	chr6	169567747	169568746	26.5525	Intergenic	-5162	101929484	LINC01615	long intergenic non-protein coding RNA 1615
47.4327	chr11	8740531	8741601	17.2811	Intron (NM_005418, Intron 7 of 22)	34080	677826	SNORA3B	small nucleolar RNA, H/ACA box 3B
47.4098	chrX	54370771	54371770	14.7269	Intron (NM_001002838, Intron 1 of 22)	13168	65267	WNK3	WNK lysine deficient protein kinase 3
47.3956	chr16	65369735	65370764	10.6715	Intron (NR_027755, Intron 7 of 8)	-159773	101927650	LINC02126	long intergenic non-protein coding RNA 2126
47.3804	chr1	28725933	28726933	10.988	Intron (NM_001350159, Intron 2 of 15)	30182	65979	PHACTR4	phosphatase and actin regulator 4
47.3718	chr4	15696484	15697486	21.6505	Intergenic	-7703	683	BST1	bone marrow stromal cell antigen 1
47.3638	chr10	8347934	8349053	18.5565	Intergenic	-38225	100507143	LINC00708	long intergenic non-protein coding RNA 708
47.3407	chr2	98566751	98567755	24.3589	Intron (NM_015348, Intron 1 of 40)	45158	23505	TMEM131	transmembrane protein 131
47.2828	chr4	95854656	95855655	15.9507	Intron (NM_001203, Intron 2 of 12)	-62228	658	BMPR1B	bone morphogenetic protein receptor type 1B
47.2529	chr3	32442671	32443670	10.9613	Intron (NM_138410, Intron 1 of 4)	9825	112616	CMTM7	CKLF like MARVEL transmembrane domain containing 7
47.2378	chr5	166335741	166336740	11.4244	Intron (NR_108020, Intron 1 of 2)	17135	102557615	LINC01947	long intergenic non-protein coding RNA 1947
47.2185	chr5	14249819	14250819	35.2132	Intron (NR_134469, Intron 1 of 56)	106868	7204	TRIO	trio Rho guanine nucleotide exchange factor
47.1864	chr10	3507488	3508487	18.5505	Intron (NR_155743, Intron 3 of 4)	37043	101927880	LINC02669	long intergenic non-protein coding RNA 2669
47.169	chr1	101701930	101702929	23.4246	Promoter-TSS (NR_104626)	124	1901	S1PR1	sphingosine-1-phosphate receptor 1
47.1286	chr2	191471574	191473380	20.3382	Intergenic	-41144	4664	NAB1	NGFI-A binding protein 1
47.1253	chr12	109116705	109117704	27.1305	Intron (NM_014325, Intron 1 of 10)	7415	23603	CORO1C	coronin 1C
47.111	chr10	96140428	96141592	9.37936	Intergenic	-18314	64318	NOC3L	NOC3 like DNA replication regulator
47.0652	chr3	58983896	58984923	28.454	Intron (NR_147235, Intron 4 of 6)	51342	200844	C3orf67	chromosome 3 open reading frame 67
47.0619	chr15	39505337	39506342	16.7562	Intergenic	-37031	400360	C15orf54	chromosome 15 open reading frame 54 (putative)
46.9968	chr11	115547236	115548235	10.764	Intergenic	57745	101928985	LOC101928985	uncharacterized LOC101928985
46.9705	chr12	105811713	105812726	58.7471	Intergenic	87750	387882	C12orf75	chromosome 12 open reading frame 75
46.9241	chr8	130471714	130472744	39.5694	Intron (NR_130919, Intron 1 of 3)	24159	100500839	MIR3686	microRNA 3686
46.9172	chr8	51956204	51957216	14.5605	Intergenic	765295	137902	PXDNL	peroxidasin like
46.9048	chr14	48792530	48793534	11.7799	Intergenic	-528815	100506433	LINC00648	long intergenic non-protein coding RNA 648
46.8821	chr17	2858027	2859140	16.8917	Intron (NM_001100398, Intron 3 of 23)	10606	101927911	LOC101927911	uncharacterized LOC101927911
46.8647	chr1	21475943	21477129	18.3313	Intron (NM_001198803, Intron 1 of 12)	17996	8672	EIF4G3	eukaryotic translation initiation factor 4 gamma 3
46.8353	chr10	45356445	45357456	13.8629	Intron (NR_033842, Intron 2 of 7)	-49814	643236	TMEM72	transmembrane protein 72
46.8286	chr2	159343130	159344146	16.0905	Intron (NM_001304969, Intron 1 of 21)	30174	8502	PKP4	plakophilin 4
46.8197	chr5	151075600	151076919	24.3302	Intergenic	-9783	6678	SPARC	secreted protein acidic and cysteine rich
46.8158	chr7	28609589	28611172	24.0007	Intron (NM_182898, Intron 5 of 10)	-115370	9586	CREB5	cAMP responsive element binding protein 5
46.7798	chr19	31618153	31619196	25.1416	Intergenic	-39742	107985312	LINC01791	long intergenic non-protein coding RNA 1791
46.7573	chr21	31260455	31261454	4.44513	Intron (NM_001320616, Intron 1 of 16)	51360	2897	GRIK1	glutamate ionotropic receptor kainate type subunit 1
46.7392	chr2	128478569	128479595	10.5402	Intron (NM_018383, Intron 15 of 21)	20011	84826	SFT2D3	SFT2 domain containing 3
46.7351	chr12	110649366	110650409	12.1477	Intron (NR_144950, Intron 18 of 18)	-69165	488	ATP2A2	ATPase sarcoplasmic/endoplasmic reticulum Ca2+ transporting 2
46.733	chr10	31364058	31365181	11.4637	Intergenic	-43753	220929	ZNF438	zinc finger protein 438
46.7041	chr14	75593252	75594267	15.1915	Promoter-TSS (NM_001329238)	-8	91754	NEK9	NIMA related kinase 9
46.6689	chr4	21471238	21472267	12.4975	Intron (NM_147182, Intron 2 of 8)	-5371	102465859	MIR7978	microRNA 7978
46.6455	chr2	23648378	23649501	24.9511	Intron (NM_052920, Intron 1 of 13)	40889	114818	KLHL29	kelch like family member 29
46.6251	chr19	46916444	46917443	9.33686	Promoter-TSS (NM_032040)	-122	83987	CCDC8	coiled-coil domain containing 8
46.6136	chr18	7157952	7158951	11.3171	Intergenic	-40655	284217	LAMA1	laminin subunit alpha 1
46.5946	chr10	128555866	128556895	21.9558	Intergenic	-37598	1793	DOCK1	dedicator of cytokinesis 1
46.5786	chr7	27121505	27122504	10.1304	Intergenic	13615	3198	HOXA1	homeobox A1
46.5638	chr7	87193255	87194258	220.507	Intron (NM_001348946, Intron 7 of 27)	36444	5243	ABCB1	ATP binding cassette subfamily B member 1
46.5349	chr14	68931214	68932213	14.8636	Intron (NM_001321817, Intron 10 of 11)	163791	100996664	LOC100996664	uncharacterized LOC100996664
46.508	chr4	44985120	44986119	10.7793	Intergenic	-256968	132789	GNPDA2	glucosamine-6-phosphate deaminase 2
46.4992	chr4	85300903	85301943	15.562	Intergenic	-81101	101928978	LOC101928978	uncharacterized LOC101928978
46.4906	chr14	52140995	52141994	10.3298	Intron (NM_001267046, Intron 1 of 13)	22866	122786	FRMD6	FERM domain containing 6
46.4876	chr11	101341270	101342269	8.82091	Intron (NM_004621, Intron 9 of 12)	48867	100500823	MIR3920	microRNA 3920
46.4573	chr11	122579350	122580355	25.3399	Intron (NM_001363365, Intron 1 of 13)	53422	84959	UBASH3B	ubiquitin associated and SH3 domain containing B
46.4554	chr8	38262391	38263390	20.5745	Intron (NM_001199660, Intron 8 of 10)	18241	137994	LETM2	leucine zipper and EF-hand containing transmembrane protein 2
46.4411	chr14	103744056	103745055	22.55	Intergenic	-39066	105378183	LOC105378183	uncharacterized LOC105378183
46.4353	chr11	122673796	122675593	21.6399	Intron (NM_001363365, Intron 11 of 13)	-34514	56253	CRTAM	cytotoxic and regulatory T cell molecule
46.4236	chr1	95110922	95112529	22.2365	Intron (NR_160780, Intron 3 of 5)	99731	100616321	MIR378G	microRNA 378g
46.3542	chr12	58424349	58425437	13.4524	Intergenic	-56782	105369785	LINC02403	long intergenic non-protein coding RNA 2403
46.3237	chr18	14384661	14385660	6.82432	Intergenic	47738	284233	CYP4F35P	cytochrome P450 family 4 subfamily F member 35, pseudogene
46.3198	chr7	47979994	47980993	10.2845	Intron (NM_138295, Intron 2 of 56)	7595	168507	PKD1L1	polycystin 1 like 1, transient receptor potential channel interacting
46.3172	chr14	25647199	25648198	10.2319	Intergenic	-128195	29091	STXBP6	syntaxin binding protein 6
46.315	chr16	68064680	68066577	18.807	Intron (NM_001271763, Intron 2 of 14)	-7858	55794	DDX28	DEAD-box helicase 28
46.2718	chr5	136705742	136706741	16.6611	Intron (NM_004598, Intron 2 of 10)	128774	6695	SPOCK1	SPARC (osteonectin), cwcv and kazal like domains proteoglycan 1
46.2566	chr8	129984468	129985510	34.8582	Intergenic	-6742	106144608	LINC00976	long intergenic non-protein coding RNA 976
46.2094	chr17	42871987	42872986	25.6616	Intergenic	35169	10052	GJC1	gap junction protein gamma 1
46.207	chr8	128343976	128345016	10.8953	Intron (NR_117099, Intron 2 of 3)	-68148	101805488	CCAT2	colon cancer associated transcript 2
46.2058	chr4	147176276	147177754	14.5774	Non-coding (NR_133924, Exon 10 of 10)	41325	345051	REELD1	reeler domain containing 1
46.194	chr11	111606117	111607118	37.3589	Intron (NM_181699, Intron 15 of 15)	30496	5519	PPP2R1B	protein phosphatase 2 scaffold subunit Abeta
46.1812	chr15	60476514	60477668	11.8034	Intergenic	180581	27023	FOXB1	forkhead box B1
46.1757	chrX	67636105	67637109	13.5551	Intron (NM_002547, Intron 2 of 24)	16730	4983	OPHN1	oligophrenin 1
46.1631	chr10	65313326	65315098	22.7648	Intron (NM_001001330, Intron 1 of 7)	-32562	221037	JMJD1C	jumonji domain containing 1C
46.124	chr5	99979900	99980918	20.5656	Intergenic	109331	345757	FAM174A	family with sequence similarity 174 member A
46.1112	chr8	117599188	117600197	19.2332	Intergenic	-64647	105375713	LOC105375713	uncharacterized LOC105375713
46.1086	chr1	76589068	76590550	11.1569	Intron (NM_001349105, Intron 1 of 2)	49378	256435	ST6GALNAC3	ST6 N-acetylgalactosaminide alpha-2,6-sialyltransferase 3
46.0999	chr14	67634191	67635213	9.82226	Intron (NM_020806, Intron 20 of 22)	-21455	161142	FAM71D	family with sequence similarity 71 member D
46.0777	chr19	30321790	30322811	15.0117	Intergenic	19402	898	CCNE1	cyclin E1
46.0748	chr8	73227462	73228503	23.042	Intergenic	-64113	392232	LOC392232	transient receptor potential cation channel subfamily A member 1 pseudogene
46.0713	chr3	142838084	142839083	8.74147	Promoter-TSS (NM_004267)	-30	9435	CHST2	carbohydrate sulfotransferase 2
46.0559	chr9	133641030	133642089	23.0951	Intron (NM_007313, Intron 1 of 10)	52291	25	ABL1	ABL proto-oncogene 1, non-receptor tyrosine kinase
46.035	chr18	11149135	11150134	14.5719	Promoter-TSS (NM_022068)	-873	63895	PIEZO2	piezo type mechanosensitive ion channel component 2
46.013	chr14	52020731	52021730	29.628	Intron (NR_047477, Intron 2 of 3)	45440	100874185	FRMD6-AS2	FRMD6 antisense RNA 2
45.9777	chr3	106279217	106280245	15.0883	Intergenic	679754	100302640	LINC00882	long intergenic non-protein coding RNA 882
45.9686	chr4	55434128	55435127	7.25464	Intergenic	38671	339978	LINC02260	long intergenic non-protein coding RNA 2260
45.9627	chr1	245055437	245056748	12.1329	Intergenic	-28247	3192	HNRNPU	heterogeneous nuclear ribonucleoprotein U
45.9217	chr5	158611466	158612751	17.3791	Intron (NM_001199381, Intron 3 of 10)	22548	153830	RNF145	ring finger protein 145
45.9104	chr11	133894000	133895004	16.972	Intergenic	-7665	100128239	LINC02731	long intergenic non-protein coding RNA 2731
45.84	chr1	224140070	224141101	15.9595	Intron (NR_132119, Intron 8 of 10)	39761	441124	GTF2IP20	general transcription factor IIi pseudogene 20
45.8101	chrX	139262429	139263538	14.1411	Intergenic	89157	389895	LOC389895	chromosome 16 open reading frame 72-like
45.7887	chr10	91111760	91112761	24.5599	Intergenic	19974	3437	IFIT3	interferon induced protein with tetratricopeptide repeats 3
45.7634	chr8	146054896	146055924	49.2442	Intron (NM_001349808, Intron 3 of 4)	2465	7553	ZNF7	zinc finger protein 7
45.7615	chr3	57955149	57956194	47.8743	Intergenic	-38478	2317	FLNB	filamin B
45.7368	chr6	141772227	141773233	16.4401	Intergenic	637206	4829	NMBR	neuromedin B receptor
45.73	chr14	69149158	69150257	21.2826	3' UTR (NM_001321818, Exon 11 of 11)	-54203	100996664	LOC100996664	uncharacterized LOC100996664
45.7276	chr10	11927002	11928001	31.7104	Intron (NR_038222, Intron 2 of 5)	9208	219731	PROSER2-AS1	PROSER2 antisense RNA 1
45.6883	chr10	95943091	95944129	15.0622	Intron (NM_016341, Intron 4 of 32)	-75059	101927049	PLCE1-AS2	PLCE1 antisense RNA 2
45.6722	chr1	244327024	244328042	29.2882	Intergenic	111026	10472	ZBTB18	zinc finger and BTB domain containing 18
45.6682	chr7	132550219	132551221	30.3592	Intron (NR_133671, Intron 6 of 10)	106990	100506937	LOC100506937	uncharacterized LOC100506937
45.6488	chr6	72113546	72115174	22.7476	Intergenic	-1036	407029	MIR30A	microRNA 30a
45.6271	chr11	128376810	128377814	52.2168	Intron (NM_001143820, Intron 3 of 9)	14893	2113	ETS1	ETS proto-oncogene 1, transcription factor
45.6148	chr1	177895783	177896829	22.2519	Intergenic	42751	89866	SEC16B	SEC16 homolog B, endoplasmic reticulum export factor
45.5956	chr8	142240496	142241506	36.1861	Intron (NM_001286646, Intron 1 of 7)	-2328	57210	SLC45A4	solute carrier family 45 member 4
45.515	chr9	4292953	4294341	18.3331	Intron (NM_001042413, Intron 1 of 10)	6421	169792	GLIS3	GLIS family zinc finger 3
45.5039	chr15	27659301	27660300	8.61945	Intron (NM_001270873, Intron 5 of 5)	-253334	101928869	GABRG3-AS1	GABRG3 antisense RNA 1
45.4655	chr11	117144004	117145042	14.0039	Intron (NM_001077239, Intron 6 of 14)	-17539	100379571	BACE1-AS	BACE1 antisense RNA
45.4549	chr8	75193485	75194511	28.6349	Intron (NM_001363051, Intron 2 of 5)	39598	56704	JPH1	junctophilin 1
45.4515	chr14	34061196	34062207	7.2207	Intron (NM_173159, Intron 5 of 11)	-116442	106635522	SNORA89	small nucleolar RNA, H/ACA box 89
45.4224	chr13	73847570	73848613	15.1576	Intergenic	214948	688	KLF5	Kruppel like factor 5
45.4217	chr11	68559727	68560726	14.0244	Intron (NM_001876, Intron 9 of 18)	-41238	9633	TESMIN	testis expressed metallothionein like protein
45.3952	chr12	55370632	55371631	10.2475	Promoter-TSS (NR_147064)	-284	9840	TESPA1	thymocyte expressed, positive selection associated 1
45.3939	chr1	1672065	1673624	14.1174	Intron (NM_182838, Intron 1 of 5)	4594	9906	SLC35E2A	solute carrier family 35 member E2A
45.3884	chr1	230645172	230646171	18.9625	Intergenic	-83593	79605	PGBD5	piggyBac transposable element derived 5
45.3787	chr16	4513777	4514788	52.1868	Intron (NR_147845, Intron 4 of 6)	10344	57407	NMRAL1	NmrA like redox sensor 1
45.3383	chr1	236106444	236107460	13.1941	Intergenic	-59939	1130	LYST	lysosomal trafficking regulator
45.3356	chr16	16013569	16014602	13.8531	Intergenic	-29388	4363	ABCC1	ATP binding cassette subfamily C member 1
45.3108	chr8	131154246	131155248	58.9102	Intron (NM_018482, Intron 13 of 29)	-57733	100507117	ASAP1-IT2	ASAP1 Intronic transcript 2
45.2983	chr13	98907163	98908573	10.9378	Intron (NM_001286839, Intron 2 of 27)	47090	100422881	MIR3170	microRNA 3170
45.2965	chr8	43054006	43055066	12.1315	Exon (NM_001363227, Exon 19 of 19)	58929	138050	HGSNAT	heparan-alpha-glucosaminide N-acetyltransferase
45.2783	chr17	41669197	41670239	20.5112	Intergenic	-46010	2118	ETV4	ETS variant 4
45.2673	chr7	87135270	87136269	128.017	Intron (NM_001348946, Intron 26 of 27)	-30750	5244	ABCB4	ATP binding cassette subfamily B member 4
45.2437	chr5	14190211	14191210	59.9137	Intron (NR_134469, Intron 1 of 56)	47259	7204	TRIO	trio Rho guanine nucleotide exchange factor
45.2373	chr17	854673	855702	29.6726	Intron (NM_022463, Intron 1 of 7)	27829	64359	NXN	nucleoredoxin
45.221	chr13	114616136	114617135	13.3451	Intron (NM_001278674, Intron 3 of 7)	15329	100861555	LINC00565	long intergenic non-protein coding RNA 565
45.1947	chr11	96047158	96048157	14.2702	Intron (NM_032427, Intron 1 of 4)	-26945	100422991	MIR1260B	microRNA 1260b
45.1941	chr13	77471016	77472015	6.65935	Intergenic	-10975	115207	KCTD12	potassium channel tetramerization domain containing 12
45.1717	chr12	116774142	116775179	24.3235	Intergenic	-59669	23389	MED13L	mediator complex subunit 13L
45.168	chr2	109741687	109742686	21.8537	Intergenic	-3475	344558	SH3RF3	SH3 domain containing ring finger 3
45.1504	chr1	56797557	56798556	9.06016	Intergenic	-82579	105378744	LINC01767	long intergenic non-protein coding RNA 1767
45.1198	chr8	38793861	38794860	22.3783	Intron (NM_021623, Intron 3 of 12)	35496	59339	PLEKHA2	pleckstrin homology domain containing A2
45.1188	chr22	24180940	24182032	25.7605	Promoter-TSS (NM_001135751)	-293	91319	DERL3	derlin 3
45.0969	chr21	44144158	44145163	25.6156	Intron (NM_001001569, Intron 2 of 15)	55444	101928311	LINC01668	long intergenic non-protein coding RNA 1668
45.0968	chr12	1609129	1610128	14.0687	Promoter-TSS (NR_028415)	-29	100292680	LINC00942	long intergenic non-protein coding RNA 942
45.0782	chr7	73557811	73558816	20.0424	Intergenic	-30373	7458	EIF4H	eukaryotic translation initiation factor 4H
45.0746	chr12	6560224	6561252	22.8258	Promoter-TSS (NM_001351355)	-55	678655	CD27-AS1	CD27 antisense RNA 1
45.0729	chr12	6288215	6290233	25.1724	Intergenic	-19888	928	CD9	CD9 molecule
45.0637	chr22	32130247	32131819	13.9011	Intron (NM_173566, Intron 2 of 8)	15085	253143	PRR14L	proline rich 14 like
45.0511	chr22	28512035	28513045	18.451	Intron (NM_001145418, Intron 6 of 22)	-195940	100423034	MIR3199-1	microRNA 3199-1
45.0333	chr2	142790647	142791657	15.7101	Intron (NM_018557, Intron 1 of 90)	98118	53353	LRP1B	LDL receptor related protein 1B
45.0294	chr1	244089852	244090873	18.5911	Intron (NR_033883, Intron 1 of 11)	9658	339529	LINC02774	long intergenic non-protein coding RNA 2774
45.0164	chr1	229099609	229100627	18.1	Intergenic	210430	100616234	MIR4454	microRNA 4454
45.0109	chr15	61390945	61391944	7.2122	Intron (NM_134261, Intron 1 of 10)	130057	6095	RORA	RAR related orphan receptor A
45.0046	chr5	27307979	27308989	8.44432	Intergenic	-163915	643401	PURPL	p53 upregulated regulator of p53 levels
44.996	chr9	16252305	16253304	8.07639	Intron (NM_001364979, Intron 1 of 3)	301	100129385	C9orf92	chromosome 9 open reading frame 92
44.9942	chr8	118632928	118633949	18.4026	Intergenic	100486	90390	MED30	mediator complex subunit 30
44.9821	chr10	35294535	35295573	13.2335	Intergenic	68157	8453	CUL2	cullin 2
44.9788	chr19	53757635	53758652	12.892	Promoter-TSS (NM_182609)	13	342926	ZNF677	zinc finger protein 677
44.9754	chr2	237085885	237087390	28.326	Intergenic	-9608	2637	GBX2	gastrulation brain homeobox 2
44.9567	chr21	14781143	14782173	22.6929	Intergenic	-2877	100423018	MIR3156-3	microRNA 3156-3
44.9537	chr21	16368072	16369107	25.3553	Intron (NM_003489, Intron 3 of 3)	68732	8204	NRIP1	nuclear receptor interacting protein 1
44.9443	chr15	26128651	26129796	22.2782	Intergenic	-18284	100128714	LINC02346	long intergenic non-protein coding RNA 2346
44.9234	chrX	67879260	67880259	13.3457	Intron (NM_014725, Intron 1 of 13)	12248	9754	STARD8	StAR related lipid transfer domain containing 8
44.8647	chr2	100496359	100497381	51.0305	Intron (NM_002285, Intron 6 of 23)	225175	3899	AFF3	AF4/FMR2 family member 3
44.8631	chr18	14826705	14827712	16.7886	Intron (NM_001367607, Intron 32 of 43)	-2957	100422907	MIR3156-2	microRNA 3156-2
44.8539	chr8	32405077	32406114	24.6751	Promoter-TSS (NM_013958)	-133	3084	NRG1	neuregulin 1
44.8394	chr9	77374890	77375933	24.0136	Intron (NM_001177311, Intron 27 of 38)	126852	140803	TRPM6	transient receptor potential cation channel subfamily M member 6
44.8346	chr12	60541655	60542657	12.2167	Intergenic	459005	9194	SLC16A7	solute carrier family 16 member 7
44.8249	chr9	18658451	18659450	7.34574	Intron (NM_001040272, Intron 8 of 28)	85646	100422869	MIR3152	microRNA 3152
44.8082	chr4	18128872	18129871	8.03521	Intergenic	-105873	254251	LCORL	ligand dependent nuclear receptor corepressor like
44.808	chr14	64904598	64905931	21.307	Intron (NM_001364837, Intron 16 of 26)	-26953	9495	AKAP5	A-kinase anchoring protein 5
44.8009	chr2	11514331	11515336	19.9702	Intergenic	-19274	100874055	LINC00570	long intergenic non-protein coding RNA 570
44.7946	chr11	95253940	95254998	19.6039	Intergenic	268477	143684	FAM76B	family with sequence similarity 76 member B
44.7908	chr1	58897301	58899229	30.7314	Intergenic	114133	115209	OMA1	OMA1 zinc metallopeptidase
44.7651	chr6	170714002	170715063	12.0922	3' UTR (NM_001286380, Exon 11 of 11)	74683	100616430	MIR4644	microRNA 4644
44.7539	chr11	130667848	130668857	16.7511	Intergenic	63653	100507431	LINC02551	long intergenic non-protein coding RNA 2551
44.692	chr2	236617432	236618432	31.4887	Intron (NM_014914, Intron 2 of 16)	-191367	27321	TNRC17	trinucleotide repeat containing 17
44.6552	chr11	101488276	101490135	16.1338	Intergenic	-34467	7225	TRPC6	transient receptor potential cation channel subfamily C member 6
44.6405	chr17	78475506	78476507	11.0416	Intergenic	-25599	4884	NPTX1	neuronal pentraxin 1
44.5946	chr4	23040175	23042129	13.8165	Intergenic	325440	57733	GBA3	glucosylceramidase beta 3 (gene/pseudogene)
44.5708	chr10	39060144	39061143	7.99357	Intergenic	70916	399746	ACTR3BP5	ACTR3B pseudogene 5
44.5671	chr4	180545776	180546775	12.1291	Intergenic	1534027	728081	LINC00290	long intergenic non-protein coding RNA 290
44.5268	chr7	128469218	128470226	35.7059	Promoter-TSS (NM_001458)	-738	2318	FLNC	filamin C
44.5245	chr3	110061917	110062916	6.94967	Intergenic	726390	100506555	NECTIN3-AS1	NECTIN3 antisense RNA 1
44.4989	chr12	106526535	106527573	26.3081	Intron (NM_014840, Intron 1 of 6)	6757	9891	NUAK1	NUAK family kinase 1
44.4593	chr11	12203863	12204889	33.0799	Intron (NR_144420, Intron 3 of 27)	19146	102466906	MIR6124	microRNA 6124
44.3883	chr7	29185596	29186617	9.15535	Promoter-TSS (NM_031311)	47	54504	CPVL	carboxypeptidase vitellogenic like
44.3853	chr3	159646126	159647211	26.3026	Intron (NR_108088, Intron 9 of 9)	-59954	3592	IL12A	interleukin 12A
44.3742	chr9	35689399	35690398	17.3341	Promoter-TSS (NM_001301226)	24	7169	TPM2	tropomyosin 2
44.3363	chr12	116892438	116894156	28.3506	Intergenic	-27174	100616309	MIR4472-2	microRNA 4472-2
44.3359	chr9	90221814	90222813	13.2215	Intron (NM_001288729, Intron 3 of 25)	53944	100506897	DAPK1-IT1	DAPK1 Intronic transcript 1
44.3248	chr3	47050475	47051489	25.8439	3' UTR (NM_015175, Exon 54 of 54)	-2050	100129354	NRADDP	neurotrophin receptor associated death domain, pseudogene
44.2285	chr8	62633656	62634689	17.7912	Intergenic	6825	100616484	MIR4470	microRNA 4470
44.2211	chr20	55014459	55015481	21.5551	Intron (NM_001164116, Intron 3 of 6)	27654	57091	CASS4	Cas scaffold protein family member 4
44.2088	chr5	34534002	34535001	8.8834	Intergenic	-121932	26064	RAI14	retinoic acid induced 14
44.1988	chr12	118124544	118125579	19.3126	Intron (NM_173598, Intron 4 of 19)	281734	283455	KSR2	kinase suppressor of ras 2
44.1591	chr16	29625794	29626793	25.8135	Intergenic	-1255	440354	SMG1P2	SMG1 pseudogene 2
44.1459	chr20	18505028	18506028	16.9812	Intron (NM_001172745, Intron 5 of 19)	16944	10483	SEC23B	SEC23 homolog B, coat complex II component
44.1453	chr12	107026292	107027300	38.2618	Intron (NM_213594, Intron 2 of 17)	31870	5992	RFX4	regulatory factor X4
44.1322	chr7	131222860	131223873	37.9349	Intron (NM_001018111, Intron 1 of 8)	18021	5420	PODXL	podocalyxin like
44.0887	chr19	4696394	4697393	16.3893	Intron (NM_139159, Intron 11 of 21)	17599	100131094	DPP9-AS1	DPP9 antisense RNA 1
44.088	chr1	159966157	159967164	12.4561	Intergenic	35120	93183	PIGM	phosphatidylinositol glycan anchor biosynthesis class M
44.0591	chrX	110038667	110039666	10.252	Promoter-TSS (NM_001367205)	-121	91851	CHRDL1	chordin like 1
44.0399	chr5	136412234	136413539	19.1778	Intron (NM_004598, Intron 5 of 10)	-51000	105379192	LOC105379192	uncharacterized LOC105379192
44.0013	chr14	57422097	57423130	13.3461	Intergenic	142737	100309464	OTX2-AS1	OTX2 antisense RNA 1 (head to head)
43.9595	chr4	172800961	172801994	11.203	Intron (NM_001034845, Intron 2 of 12)	-66719	441052	LOC441052	uncharacterized LOC441052
43.9565	chr6	9520292	9521318	20.3594	Intergenic	868363	728655	HULC	hepatocellular carcinoma up-regulated long Non-coding RNA
43.9486	chr3	9987788	9989511	32.6136	Promoter-TSS (NR_046734)	-439	100874032	PRRT3-AS1	PRRT3 antisense RNA 1
43.9431	chr11	29141273	29142272	9.11007	Intergenic	-474188	105376606	LINC02546	long intergenic non-protein coding RNA 2546
43.9419	chr5	141595126	141596134	16.5779	Intergenic	102257	100642175	SPRY4-IT1	SPRY4 Intronic transcript 1
43.9239	chr2	107707296	107708329	37.6985	Intergenic	-204247	84620	ST6GAL2	ST6 beta-galactoside alpha-2,6-sialyltransferase 2
43.9199	chr2	164461094	164462093	8.80851	3' UTR (NM_018086, Exon 3 of 3)	130925	55137	FIGN	fidgetin, microtubule severing factor
43.9055	chr16	86388837	86389846	33.6797	Intergenic	-10056	732275	LINC00917	long intergenic non-protein coding RNA 917
43.8966	chr3	12549480	12550544	37.4604	Intron (NM_001321278, Intron 6 of 11)	23984	80746	TSEN2	tRNA splicing endonuclease subunit 2
43.8871	chr21	30502232	30503231	10.657	Promoter-TSS (NM_001371372)	-234	56911	MAP3K7CL	MAP3K7 C-terminal like
43.8833	chr4	21803753	21804756	8.31396	Intron (NM_147182, Intron 1 of 8)	50557	359822	KCNIP4-IT1	KCNIP4 Intronic transcript 1
43.8768	chr8	141070652	141071651	19.2337	Intron (NM_001160372, Intron 17 of 22)	39483	359809	PEG13	paternally expressed 13
43.8687	chr4	90645554	90646553	7.11743	3' UTR (NM_001146055, Exon 6 of 6)	-111499	644248	SNCA-AS1	SNCA antisense RNA 1
43.8493	chr1	233210495	233211494	9.3856	Intron (NM_014801, Intron 23 of 33)	124406	84284	NTPCR	nucleoside-triphosphatase, cancer-related
43.8414	chr11	28778145	28779144	12.483	Intergenic	-279549	102466876	MIR8068	microRNA 8068
43.7769	chr1	247578979	247579978	29.0395	Promoter-TSS (NM_001127461)	20	114548	NLRP3	NLR family pyrin domain containing 3
43.7553	chr6	121581639	121582717	9.42058	Intron (NR_104452, Intron 15 of 35)	73448	221322	TBC1D32	TBC1 domain family member 32
43.7479	chr2	69198449	69199587	25.8075	Intergenic	-2687	56287	GKN1	gastrokine 1
43.7237	chr11	75129652	75130659	19.2115	Intron (NM_001256802, Intron 6 of 6)	11519	283212	KLHL35	kelch like family member 35
43.7063	chr12	127757116	127758178	14.33	Intergenic	11181	105370065	LINC02376	long intergenic non-protein coding RNA 2376
43.6734	chr1	223381764	223382763	10.1419	Intergenic	-65673	7100	TLR5	toll like receptor 5
43.6654	chr1	39863972	39864986	20.117	Intron (NM_012090, Intron 52 of 92)	-10266	643314	KIAA0754	KIAA0754
43.6615	chr16	12049221	12050227	25.3612	Intron (NM_001355514, Intron 3 of 8)	8571	729978	NPIPB2	nuclear pore complex interacting protein family, member B2
43.6352	chr1	101062305	101063306	23.9181	Intergenic	49755	100128787	LINC01349	long intergenic non-protein coding RNA 1349
43.6213	chr3	45174963	45175962	10.1803	Intron (NM_178181, Intron 1 of 3)	12408	64866	CDCP1	CUB domain containing protein 1
43.6093	chr8	74846117	74847128	27.6798	Intergenic	37521	6921	ELOC	elongin C
43.5947	chr17	5688374	5689373	11.9851	Intron (NR_040000, Intron 1 of 3)	13319	339166	LOC339166	uncharacterized LOC339166
43.5764	chr8	119926238	119927240	17.444	Intergenic	37385	4982	TNFRSF11B	TNF receptor superfamily member 11b
43.5506	chr1	233117661	233118688	40.8785	Non-coding (NR_138025, Exon 3 of 3)	31586	84284	NTPCR	nucleoside-triphosphatase, cancer-related
43.5416	chr1	1992444	1993469	13.5747	Intron (NM_002744, Intron 4 of 17)	11106	5590	PRKCZ	protein kinase C zeta
43.5156	chr5	167533075	167534101	17.9864	Intron (NM_001368145, Intron 8 of 26)	-59262	113219458	MIR12125	microRNA 12125
43.4884	chr7	54247048	54248047	8.28175	Intergenic	-150843	102723605	LINC01445	long intergenic non-protein coding RNA 1445
43.4733	chr16	67004629	67005630	17.2314	Exon (NM_024922, Exon 10 of 13)	3751	23491	CES3	carboxylesterase 3
43.4517	chr8	118952792	118953791	17.4774	Intron (NM_000127, Intron 1 of 10)	-20139	109623457	SNORD168	small nucleolar RNA, C/D box 168
43.4372	chr19	8673971	8674970	14.9001	Intron (NM_030957, Intron 1 of 25)	1130	81794	ADAMTS10	ADAM metallopeptidase with thrombospondin type 1 motif 10
43.4325	chr20	62330151	62331180	31.6273	TTS (NR_037882)	2660	8771	TNFRSF6B	TNF receptor superfamily member 6b
43.4179	chr1	233824331	233825331	24.4681	Intergenic	64933	100616390	MIR4427	microRNA 4427
43.4127	chr2	240386571	240387570	16.2678	Intergenic	63628	101928111	HDAC4-AS1	HDAC4 antisense RNA 1
43.404	chr11	127520739	127521743	33.973	Intergenic	380276	101929497	LINC02712	long intergenic non-protein coding RNA 2712
43.4038	chr9	108595560	108596563	14.2118	Intergenic	139239	55151	TMEM38B	transmembrane protein 38B
43.3771	chr1	79338167	79339166	6.40536	Intergenic	133749	64123	ADGRL4	adhesion G protein-coupled receptor L4
43.3748	chr10	116616082	116617081	9.60448	Intron (NM_001135051, Intron 14 of 16)	35042	57700	FAM160B1	family with sequence similarity 160 member B1
43.3734	chr3	46597857	46598898	12.3124	Promoter-TSS (NR_073385)	-511	83598	LRRC2-AS1	LRRC2 antisense RNA 1
43.3556	chr2	216563000	216563999	14.1539	Intron (NR_037195, Intron 5 of 9)	-19267	105373869	LINC01614	long intergenic non-protein coding RNA 1614
43.3549	chr1	21409012	21410087	15.7663	Intron (NM_003760, Intron 1 of 31)	28327	8672	EIF4G3	eukaryotic translation initiation factor 4 gamma 3
43.35	chr1	60144207	60145207	11.7448	Intron (NM_001244714, Intron 12 of 13)	54261	100616409	MIR4711	microRNA 4711
43.346	chr5	149848900	149849905	30.6131	Intergenic	16153	102546298	NDST1-AS1	NDST1 antisense RNA 1
43.3221	chr1	209830075	209831074	12.1743	Intergenic	-4804	3914	LAMB3	laminin subunit beta 3
43.2844	chr10	369543	370547	28.5279	Intron (NM_014974, Intron 31 of 36)	144111	10771	ZMYND11	zinc finger MYND-type containing 11
43.2573	chr11	61370280	61371374	18.8172	Intron (NR_110189, Intron 3 of 3)	-11681	113157	RPLP0P2	ribosomal protein lateral stalk subunit P0 pseudogene 2
43.2292	chr7	55375628	55376627	7.29953	Intergenic	-52799	102725541	ELDR	EGFR long Non-coding downstream RNA
43.2021	chr2	235076942	235078497	11.4451	Intergenic	118373	6694	SPP2	secreted phosphoprotein 2
43.199	chr8	142026931	142028449	48.7195	Intergenic	-15512	5747	PTK2	protein tyrosine kinase 2
43.198	chr9	8455967	8456980	6.3012	Intron (NM_130392, Intron 17 of 30)	277473	5789	PTPRD	protein tyrosine phosphatase receptor type D
43.1752	chr13	115060258	115061257	12.8147	Intron (NR_148485, Intron 5 of 6)	12887	65110	UPF3A	UPF3A regulator of nonsense mediated mRNA decay
43.1553	chr5	97645206	97646234	33.5415	Intergenic	-148777	105379098	LINC01846	long intergenic non-protein coding RNA 1846
43.1475	chr11	57500463	57501464	23.8856	Intron (NM_001347891, Intron 2 of 7)	-7759	280636	SELENOH	selenoprotein H
43.1086	chr8	66195887	66196886	11.8169	Intergenic	-103811	552859	LINC00251	long intergenic non-protein coding RNA 251
43.0691	chr5	14406276	14407302	34.1369	Intron (NR_134469, Intron 33 of 56)	-57303	109623458	SNORD170	small nucleolar RNA, C/D box 170
43.0478	chr7	57609395	57610399	18.0171	Intergenic	100014	441234	ZNF716	zinc finger protein 716
43.0354	chr2	1656481	1657480	8.19741	Intron (NM_012293, Intron 16 of 22)	91307	7837	PXDN	peroxidasin
43.0268	chr4	132922406	132923405	6.14539	Intergenic	236912	101927305	SNHG27	small nucleolar RNA host gene 27
43.0119	chr21	17565992	17567039	29.216	Promoter-TSS (NR_027791)	-184	388815	MIR99AHG	mir-99a-let-7c cluster host gene
43.0082	chr1	240475894	240476895	11.4949	Intron (NM_001348094, Intron 6 of 14)	221211	56776	FMN2	formin 2
42.978	chr17	46313666	46314749	11.0897	Intron (NM_001075099, Intron 4 of 12)	-57502	105371807	THRA1/BTR	uncharacterized LOC105371807
42.9726	chr5	61264874	61266320	13.782	Intergenic	-234072	100506526	C5orf64-AS1	C5orf64 antisense RNA 1
42.9574	chr11	90201771	90202770	21.0604	Intron (NR_104190, Intron 1 of 6)	86755	100616186	MIR4490	microRNA 4490
42.957	chr2	119006742	119007768	25.8856	Intergenic	-63293	100506797	THORLNC	testis associated oncogenic lncRNA
42.9274	chr7	19558661	19559660	9.95709	Intergenic	185899	100422967	MIR3146	microRNA 3146
42.9134	chr19	56904459	56905476	15.4593	Promoter-TSS (NM_001320371)	-64	147948	ZNF582	zinc finger protein 582
42.9096	chr4	167356340	167357362	14.6893	Intergenic	562462	7092	TLL1	tolloid like 1
42.8901	chr8	30111867	30112866	11.4342	Intergenic	98481	10671	DCTN6	dynactin subunit 6
42.8894	chr11	77733809	77734818	23.6998	Promoter-TSS (NM_023930)	9	65987	KCTD14	potassium channel tetramerization domain containing 14
42.8761	chr16	4103502	4104506	22.5206	Intron (NM_001116, Intron 2 of 10)	62439	115	ADCY9	adenylate cyclase 9
42.8577	chr8	42397937	42398940	48.844	Intron (NM_001363186, Intron 1 of 3)	-1341	6575	SLC20A2	solute carrier family 20 member 2
42.8352	chr14	34224299	34225298	8.55834	Intron (NM_173159, Intron 7 of 11)	46655	106635522	SNORA89	small nucleolar RNA, H/ACA box 89
42.8279	chr3	44925187	44926186	17.6401	Intron (NM_003241, Intron 1 of 13)	9586	7047	TGM4	transglutaminase 4
42.8189	chr11	69088399	69089917	23.3505	Intergenic	27536	26579	MYEOV	myeloma overexpressed
42.7943	chr10	17280461	17281460	17.1638	Intergenic	-8976	100507347	VIM-AS1	VIM antisense RNA 1
42.786	chr12	109195760	109196789	28.3142	Intron (NM_018984, Intron 10 of 14)	25053	54434	SSH1	slingshot protein phosphatase 1
42.77	chr2	74641702	74643147	17.5009	Exon (NM_001316764, Exon 3 of 3)	2420	388963	C2orf81	chromosome 2 open reading frame 81
42.7671	chr9	8365835	8366834	11.4198	Intron (NM_130392, Intron 24 of 30)	367612	5789	PTPRD	protein tyrosine phosphatase receptor type D
42.7659	chrX	125173659	125174658	8.59006	Intergenic	-69587	101928495	LOC101928495	uncharacterized LOC101928495
42.7375	chr21	16403610	16404651	38.5991	Intron (NM_003489, Intron 2 of 3)	33191	8204	NRIP1	nuclear receptor interacting protein 1
42.7209	chr3	112390407	112391486	19.6356	Intergenic	-30956	151887	CCDC80	coiled-coil domain containing 80
42.6638	chr9	31881002	31882001	9.90216	Intergenic	-500013	101929620	LINC01243	long intergenic non-protein coding RNA 1243
42.663	chr15	25637320	25638319	8.11049	Intron (NR_146177, Intron 147 of 147)	45557	7337	UBE3A	ubiquitin protein ligase E3A
42.6197	chrX	135296340	135297369	17.7038	3' UTR (NM_001173517, Exon 18 of 18)	9793	2273	FHL1	four and a half LIM domains 1
42.603	chr3	110533436	110534519	10.1478	Intergenic	254829	100506555	NECTIN3-AS1	NECTIN3 antisense RNA 1
42.5997	chr2	106814008	106815118	14.602	Intergenic	-3768	80146	UXS1	UDP-glucuronate decarboxylase 1
42.5885	chr1	174768329	174769411	17.3373	Promoter-TSS (NM_001366456)	-6	9910	RABGAP1L	RAB GTPase activating protein 1 like
42.5859	chr8	62278565	62279564	10.8086	Intron (NM_173519, Intron 2 of 5)	78535	157807	CLVS1	clavesin 1
42.5739	chr5	149337113	149338223	28.388	Intergenic	-2632	1836	SLC26A2	solute carrier family 26 member 2
42.5569	chr2	120809849	120810876	16.4211	Intron (NM_001330310, Intron 3 of 24)	39709	57669	EPB41L5	erythrocyte membrane protein band 4.1 like 5
42.5395	chr14	94940672	94941672	27.8353	Intron (NM_001284276, Intron 1 of 5)	1362	327657	SERPINA9	serpin family A member 9
42.535	chr19	9433955	9434959	20.9821	Promoter-TSS (NM_032497)	9	84527	ZNF559	zinc finger protein 559
42.5244	chr1	223959124	223960483	15.1719	Intron (NM_001146068, Intron 19 of 20)	59562	824	CAPN2	calpain 2
42.493	chr5	10691674	10693231	19.5618	Intron (NM_004394, Intron 2 of 3)	68894	1611	DAP	death associated protein
42.4921	chr6	170747080	170748079	22.9191	Intergenic	107730	100616430	MIR4644	microRNA 4644
42.491	chr21	17496424	17497428	14.2216	Intron (NR_111005, Intron 1 of 6)	53492	388815	MIR99AHG	mir-99a-let-7c cluster host gene
42.4894	chr7	142169756	142170791	16.4784	Intergenic	-12855	113839523	MIR11400	microRNA 11400
42.4505	chr12	8810720	8811719	16.5797	Intron (NM_001297710, Intron 2 of 7)	4203	8076	MFAP5	microfibril associated protein 5
42.4428	chr1	234792501	234793567	36.7295	Intron (NR_125944, Intron 3 of 3)	10999	101927787	LOC101927787	uncharacterized LOC101927787
42.4411	chr17	46013070	46014094	21.036	Intron (NR_103857, Intron 1 of 2)	5188	100506325	SP2-AS1	SP2 antisense RNA 1
42.4026	chr1	225842798	225843809	17.9241	Intergenic	-2478	55740	ENAH	ENAH actin regulator
42.3974	chr2	242486190	242487300	20.9909	Intron (NR_033346, Intron 1 of 1)	-11415	666	BOK	BCL2 family apoptosis regulator BOK
42.3557	chr5	72666028	72667060	24.9803	Intergenic	32811	105379033	LINC02230	long intergenic non-protein coding RNA 2230
42.3548	chr2	104426371	104427380	25.9519	Intergenic	597915	100287010	LOC100287010	uncharacterized LOC100287010
42.3071	chr9	65611950	65612965	10.6901	Intergenic	-102847	727905	SPATA31A5	SPATA31 subfamily A member 5
42.2981	chr11	19395483	19396497	15.3082	Intron (NM_001111018, Intron 1 of 37)	23719	89797	NAV2	neuron navigator 2
42.2971	chr8	41058674	41059682	11.6346	Intergenic	69484	100847068	MIR548AO	microRNA 548ao
42.2895	chr4	148630817	148631856	20.7207	Intergenic	-21903	79658	ARHGAP10	Rho GTPase activating protein 10
42.2768	chr8	53655624	53656623	8.95133	Intergenic	-29097	9821	RB1CC1	RB1 inducible coiled-coil 1
42.2548	chr13	30195608	30196637	13.2511	Intergenic	-25708	102723345	LOC102723345	uncharacterized LOC102723345
42.249	chr2	241259359	241260366	31.5533	Intergenic	-115218	2817	GPC1	glypican 1
42.2472	chr8	134048829	134049903	29.4643	3' UTR (NM_001282965, Exon 7 of 7)	9460	102466865	MIR7848	microRNA 7848
42.2386	chr2	232026349	232027348	8.04909	Intron (NM_001191037, Intron 20 of 23)	-36497	80210	ARMC9	armadillo repeat containing 9
42.235	chr3	112372084	112373083	47.7601	Intergenic	-12593	151887	CCDC80	coiled-coil domain containing 80
42.227	chr19	42927312	42928311	22.5169	Promoter-TSS (NR_073179)	-96	100996307	LIPE-AS1	LIPE antisense RNA 1
42.2217	chr19	53399687	53401454	14.8204	Intron (NM_001351775, Intron 1 of 5)	318	162967	ZNF320	zinc finger protein 320
42.2076	chr17	48104636	48105687	72.3023	Intergenic	27942	284080	PICART1	p53 inducible cancer associated RNA transcript 1
42.1958	chr1	47874641	47875645	29.209	Intron (NR_126355, Intron 2 of 4)	-6814	2301	FOXE3	forkhead box E3
42.1943	chr9	18071058	18072065	18.9737	Intergenic	-402590	92949	ADAMTSL1	ADAMTS like 1
42.1835	chr17	36607735	36608734	27.4399	Intron (NM_001199417, Intron 1 of 23)	23526	57636	ARHGAP23	Rho GTPase activating protein 23
42.1793	chr14	20281067	20282066	27.1511	Intron (NM_001004723, Intron 1 of 1)	9637	390429	OR4N2	olfactory receptor family 4 subfamily N member 2
42.1746	chr7	137367019	137368035	28.546	Intron (NM_001321710, Intron 2 of 32)	163551	9162	DGKI	diacylglycerol kinase iota
42.1618	chr14	69014528	69015543	70.7158	Intron (NM_001321818, Intron 10 of 10)	80469	100996664	LOC100996664	uncharacterized LOC100996664
42.1589	chr18	19019059	19020061	20.5071	Exon (NM_001142966, Exon 8 of 33)	161105	114799	ESCO1	establishment of sister chromatid cohesion N-acetyltransferase 1
42.1387	chr2	9455164	9456163	16.0989	Intron (NM_001135191, Intron 3 of 26)	107057	9270	ITGB1BP1	integrin subunit beta 1 binding protein 1
42.1347	chr19	21646280	21647317	14.2494	Intergenic	-19719	400680	LINC00664	long intergenic non-protein coding RNA 664
42.1301	chr12	109231861	109232861	47.1811	Intron (NM_018984, Intron 2 of 14)	-1579	693204	MIR619	microRNA 619
42.1078	chr1	52389830	52390849	16.7509	Intron (NM_002867, Intron 4 of 4)	-45730	4898	NRDC	nardilysin convertase
42.1069	chr6	13407714	13408723	16.0103	5' UTR (NM_001242630, Exon 1 of 2)	151	54438	GFOD1	glucose-fructose oxidoreductase domain containing 1
42.0819	chr7	43687206	43688368	31.1754	Intron (NM_001350924, Intron 4 of 7)	65080	9263	STK17A	serine/threonine kinase 17a
42.0783	chr11	57194115	57195114	16.8223	Promoter-TSS (NM_199329)	-20	29015	SLC43A3	solute carrier family 43 member 3
42.0721	chr16	810533	811540	46.7281	Promoter-TSS (NM_013404)	-37	10232	MSLN	mesothelin
42.0676	chr10	94730435	94731434	13.4546	Intron (NM_001319195, Intron 17 of 21)	-89621	340665	CYP26C1	cytochrome P450 family 26 subfamily C member 1
42.0414	chr7	138560248	138561247	12.7332	Intron (NM_001164665, Intron 12 of 19)	-77806	50617	ATP6V0A4	ATPase H+ transporting V0 subunit a4
42.0131	chr8	19962847	19963858	16.6863	Intergenic	77295	6570	SLC18A1	solute carrier family 18 member A1
41.9981	chr3	185373923	185374976	29.3192	Intron (NR_138486, Intron 11 of 15)	-56591	646600	IGF2BP2-AS1	IGF2BP2 antisense RNA 1
41.9927	chr4	121786807	121787846	22.2967	Intron (NM_001300824, Intron 2 of 13)	56695	11107	PRDM5	PR/SET domain 5
41.9628	chr9	90208896	90209896	20.2606	Intron (NM_001288729, Intron 2 of 25)	41027	100506897	DAPK1-IT1	DAPK1 Intronic transcript 1
41.958	chr6	72740875	72742436	14.4711	Intron (NM_001350411, Intron 2 of 3)	145249	22999	RIMS1	regulating synaptic membrane exocytosis 1
41.9189	chr5	151557561	151558560	11.0755	Intron (NR_109876, Intron 1 of 2)	219601	101927115	LINC01933	long intergenic non-protein coding RNA 1933
41.8882	chr6	112619814	112620813	11.0733	Intron (NR_121193, Intron 2 of 2)	-44396	3910	LAMA4	laminin subunit alpha 4
41.8786	chr4	5755128	5756127	34.2329	Exon (NM_001306090, Exon 10 of 21)	42699	2121	EVC	EvC ciliary complex subunit 1
41.8713	chr11	10947923	10948922	19.4007	Intergenic	68658	729013	ZBED5-AS1	ZBED5 antisense RNA 1
41.8372	chr4	28289137	28290147	16.6137	Intergenic	-531562	100422937	MIR4275	microRNA 4275
41.8183	chr22	17241018	17242017	8.08777	Intergenic	-12189	101929350	LINC01665	long intergenic non-protein coding RNA 1665
41.8117	chr4	19458187	19459186	14.4264	Intergenic	-794842	9353	SLIT2	slit guidance ligand 2
41.7966	chr17	50025229	50026254	10.3532	Intron (NM_001082533, Intron 3 of 9)	210333	56934	CA10	carbonic anhydrase 10
41.7447	chr18	7626539	7627612	21.017	Intron (NM_001105244, Intron 1 of 32)	59761	5797	PTPRM	protein tyrosine phosphatase receptor type M
41.7367	chr2	239342878	239343877	25.8132	Intron (NM_001330196, Intron 2 of 3)	7809	51665	ASB1	ankyrin repeat and SOCS box containing 1
41.7121	chr8	128234862	128235863	35.5117	Intergenic	-3849	100507056	CCAT1	colon cancer associated transcript 1
41.7059	chr8	118867781	118869052	22.3828	Intron (NM_000127, Intron 1 of 10)	64736	109623457	SNORD168	small nucleolar RNA, C/D box 168
41.6853	chr21	15905895	15906977	23.5853	Intron (NM_001286523, Intron 1 of 8)	12200	64092	SAMSN1	SAM domain, SH3 domain and nuclear localization signals 1
41.6418	chr11	124155171	124156170	8.78179	Intergenic	20947	219865	OR8G5	olfactory receptor family 8 subfamily G member 5
41.623	chr11	128931013	128932075	7.84481	Intron (NM_001142685, Intron 9 of 21)	-37461	9743	ARHGAP32	Rho GTPase activating protein 32
41.61	chr4	141711495	141712553	12.7033	Intergenic	-34485	23158	TBC1D9	TBC1 domain family member 9
41.5846	chr5	9059695	9060705	31.1174	Intron (NM_003966, Intron 18 of 22)	-6193	100616326	MIR4636	microRNA 4636
41.5761	chr10	43248248	43249279	19.8652	Non-coding (NR_136644, Exon 1 of 1)	-1827	105378269	LOC105378269	uncharacterized LOC105378269
41.5676	chr11	82129974	82130996	8.17168	Intergenic	-15530	101928989	MIR4300HG	MIR4300 host gene
41.5576	chr7	155021595	155022598	36.7948	Intergenic	-67386	3638	INSIG1	insulin induced gene 1
41.5496	chr16	67040896	67041978	22.8391	Intron (NM_001364782, Intron 13 of 13)	6995	283848	CES4A	carboxylesterase 4A
41.5432	chr2	99176385	99177396	13.8013	Intron (NM_001351428, Intron 17 of 24)	48085	493753	COA5	cytochrome c oxidase assembly factor 5
41.5	chr4	61590015	61591021	9.62046	Intergenic	-197819	100616450	MIR548AG1	microRNA 548ag-1
41.4974	chr2	139705264	139706443	26.7705	Intergenic	50959	647012	YY1P2	YY1 transcription factor pseudogene 2
41.4595	chr2	101846851	101847899	12.0252	Intergenic	-21973	55571	CNOT11	CCR4-NOT transcription complex subunit 11
41.4487	chr6	86204284	86205283	21.4769	3' UTR (NM_001204813, Exon 8 of 8)	44982	4907	NT5E	5'-nucleotidase ecto
41.4432	chr4	165125265	165126314	14.1592	Intron (NM_001166373, Intron 1 of 7)	-6926	23520	ANP32C	acidic nuclear phosphoprotein 32 family member C
41.4226	chr2	121672311	121673425	26.0179	Intron (NM_001371271, Intron 2 of 13)	123011	2736	GLI2	GLI family zinc finger 2
41.4097	chr11	119288070	119289079	39.8311	TTS (NM_006288)	4698	7070	THY1	Thy-1 cell surface antigen
41.4037	chr11	127808525	127809529	11.7816	Intergenic	-269634	105369564	LINC02098	long intergenic non-protein coding RNA 2098
41.3513	chr3	123101617	123102626	16.5903	Intron (NM_183357, Intron 1 of 20)	33068	111	ADCY5	adenylate cyclase 5
41.3497	chr11	101733785	101734784	12.4268	Intergenic	-51457	57562	CEP126	centrosomal protein 126
41.3493	chr18	5703248	5704573	12.3818	Intergenic	-44908	645355	MIR3976HG	MIR3976 host gene
41.3406	chr8	106081711	106082857	22.6985	Intergenic	-248382	23414	ZFPM2	zinc finger protein, FOG family member 2
[truncated: 9,687 more rows]

## Sheet: hypo
Fold change	Chr	Start	End	RPKM	Annotation	Distance to TSS	Entrez ID	Nearest Gene	Gene Description
0.00313549	chrX	115003313	115005252	122.657	Intron (NR_147172, Intron 2 of 2)	46985	106029310	DANT1	DXZ4 associated Non-coding transcript 1, proximal
0.00585116	chrX	114963062	114964066	49.0026	Intron (NR_147172, Intron 2 of 2)	6267	106029310	DANT1	DXZ4 associated Non-coding transcript 1, proximal
0.00606636	chrX	122854043	122855046	15.5012	Intron (NM_001081550, Intron 1 of 38)	12358	57187	THOC2	THO complex 2
0.0079447	chrX	149094241	149095240	5.29147	3' UTR (NM_001171909, Exon 5 of 5).2	-3064	101927685	HSFX4	heat shock transcription factor family, X-linked member 4
0.00938265	chrX	115001231	115002561	76.5891	Intron (NR_147172, Intron 2 of 2)	44599	106029310	DANT1	DXZ4 associated Non-coding transcript 1, proximal
0.00940389	chrX	149100299	149101437	18.9281	Exon (NM_001171909, Exon 4 of 5).2	2334	91966	CXorf40A	chromosome X open reading frame 40A
0.00955372	chrX	19901673	19902672	8.14268	Intron (NM_031892, Intron 1 of 17)	3546	30011	SH3KBP1	SH3 domain containing kinase binding protein 1
0.010174	chrX	106603848	106604868	9.12595	Intergenic	154496	139212	PIH1D3	PIH1 domain containing 3
0.0102181	chrX	136647688	136648715	15.0213	Promoter-TSS (NM_003413)	-85	7547	ZIC3	Zic family member 3
0.0105081	chrX	96841850	96842849	6.54076	Intron (NM_006729, Intron 26 of 26)	-22815	10824	DIAPH2-AS1	DIAPH2 antisense RNA 1
0.0105862	chrX	122703564	122704568	20.5658	Intergenic	162836	57187	THOC2	THO complex 2
0.0109745	chrX	114960070	114961076	49.4886	Intron (NR_147172, Intron 2 of 2)	3276	106029310	DANT1	DXZ4 associated Non-coding transcript 1, proximal
0.0127793	chrX	114974996	114976002	48.9296	Intron (NR_147172, Intron 2 of 2)	18202	106029310	DANT1	DXZ4 associated Non-coding transcript 1, proximal
0.0130417	chrX	114983955	114984960	49.8701	Intron (NR_147172, Intron 2 of 2)	27160	106029310	DANT1	DXZ4 associated Non-coding transcript 1, proximal
0.0132329	chrX	16680194	16681205	9.45402	Intron (NM_001144002, Intron 13 of 18)	12418	795	S100G	S100 calcium binding protein G
0.0138135	chrX	23131990	23133028	7.33516	Intron (NR_073010, Intron 2 of 11)	114432	168400	DDX53	DEAD-box helicase 53
0.0145054	chrX	114995876	114996882	50.9807	Intron (NR_147172, Intron 2 of 2)	39082	106029310	DANT1	DXZ4 associated Non-coding transcript 1, proximal
0.0151938	chrX	131303342	131304341	6.24448	Intergenic	-41791	90167	FRMD7	FERM domain containing 7
0.0156177	chrX	114977969	114978984	51.1721	Intron (NR_147172, Intron 2 of 2)	21179	106029310	DANT1	DXZ4 associated Non-coding transcript 1, proximal
0.0161739	chrX	122565861	122566860	5.87174	Intron (NM_007325, Intron 12 of 15)	248229	2892	GRIA3	glutamate ionotropic receptor AMPA type subunit 3
0.0164614	chrX	115651164	115652163	4.9576	Intergenic	-57526	203413	CT83	cancer/testis antigen 83
0.0171579	chrX	148627732	148628859	19.0577	Exon (NM_001324276, Exon 5 of 6)	2229	91966	CXorf40A	chromosome X open reading frame 40A
0.0173466	chrX	114980958	114981969	51.6448	Intron (NR_147172, Intron 2 of 2)	24166	106029310	DANT1	DXZ4 associated Non-coding transcript 1, proximal
0.0176825	chrX	140227111	140228110	5.40094	Intergenic	-15289	101954275	RNU6-7	RNA, U6 small nuclear 7
0.0177152	chrX	114998874	114999887	50.9307	Intron (NR_147172, Intron 2 of 2)	42083	106029310	DANT1	DXZ4 associated Non-coding transcript 1, proximal
0.0177308	chrX	114986934	114987934	48.8533	Intron (NR_147172, Intron 2 of 2)	30137	106029310	DANT1	DXZ4 associated Non-coding transcript 1, proximal
0.0181581	chrX	114972001	114973004	48.0402	Intron (NR_147172, Intron 2 of 2)	15205	106029310	DANT1	DXZ4 associated Non-coding transcript 1, proximal
0.0187987	chrX	118789951	118790950	7.04625	Intron (NM_145799, Intron 3 of 10)	-9639	768218	MIR766	microRNA 766
0.0191093	chrX	119776367	119777366	5.15026	Intergenic	-12861	29071	C1GALT1C1	C1GALT1 specific chaperone 1
0.0196361	chrX	77612905	77613904	5.41435	Intergenic	-30216	10800	CYSLTR1	cysteinyl leukotriene receptor 1
0.0196593	chrX	114989916	114990925	48.369	Intron (NR_147172, Intron 2 of 2)	33123	106029310	DANT1	DXZ4 associated Non-coding transcript 1, proximal
0.020174	chrX	114264865	114265864	4.72603	Intergenic	-13185	3598	IL13RA2	interleukin 13 receptor subunit alpha 2
0.0202516	chrX	21991627	21992710	13.5685	Intron (NM_004595, Intron 4 of 10)	33341	6611	SMS	spermine synthase
0.0204212	chrX	122474160	122475166	12.4328	Intron (NM_007325, Intron 4 of 15)	156532	2892	GRIA3	glutamate ionotropic receptor AMPA type subunit 3
0.0208809	chrX	118227876	118229130	9.31257	Intron (NM_020721, Intron 8 of 13)	56039	57481	KIAA1210	KIAA1210
0.0210554	chrX	47662118	47663117	5.05642	Intergenic	-33684	347344	ZNF81	zinc finger protein 81
0.0211928	chrX	114966043	114967043	47.1151	Intron (NR_147172, Intron 2 of 2)	9246	106029310	DANT1	DXZ4 associated Non-coding transcript 1, proximal
0.0220825	chrX	6850106	6851563	7.18581	Intergenic	-214497	412	STS	steroid sulfatase
0.0231461	chrX	114992884	114993889	49.0589	Intron (NR_147172, Intron 2 of 2)	36089	106029310	DANT1	DXZ4 associated Non-coding transcript 1, proximal
0.0254353	chrX	106685789	106686788	4.3625	Intergenic	-79392	84443	FRMPD3	FERM and PDZ domain containing 3
0.0264956	chrX	6647283	6648282	4.02303	Intergenic	-194623	51481	VCX3A	variable charge X-linked 3A
0.0265556	chrX	17365641	17366641	10.4694	Intergenic	-27182	4810	NHS	NHS actin remodeling regulator
0.0267469	chrX	74408268	74409267	4.66938	Intron (NM_001363821, Intron 3 of 9)	32563	139596	UPRT	uracil phosphoribosyltransferase homolog
0.027046	chrX	10050717	10051876	11.6612	Intron (NM_015691, Intron 5 of 22)	67501	55841	WWC3	WWC family member 3
0.0271821	chrX	123014859	123015864	12.6298	Intron (NR_037916, Intron 1 of 5)	21344	331	XIAP	X-linked inhibitor of apoptosis
0.0272889	chrX	130262602	130263601	4.28047	Intergenic	46692	158763	ARHGAP36	Rho GTPase activating protein 36
0.0292259	chrX	18122443	18123499	12.4255	Promoter-TSS (NR_133641)	-207	105373144	LINC01456	long intergenic non-protein coding RNA 1456
0.0300667	chrX	118535079	118536235	6.70386	Intron (NM_145305, Intron 1 of 4)	2358	203427	SLC25A43	solute carrier family 25 member 43
0.0317142	chrX	117617691	117618824	11.3421	Intergenic	-11615	139818	DOCK11	dedicator of cytokinesis 11
0.0317434	chrX	56079225	56080224	4.59684	Intron (NM_001324104, Intron 2 of 6)	145006	11279	KLF8	Kruppel like factor 8
0.0328505	chrX	106968744	106969743	9.48698	Intron (NM_198057, Intron 1 of 2)	-8951	1831	TSC22D3	TSC22 domain family member 3
0.0335973	chrX	23815183	23816183	8.24045	Intergenic	14408	6303	SAT1	spermidine/spermine N1-acetyltransferase 1
0.0349721	chrX	128471053	128472053	9.24807	Intergenic	185914	6594	SMARCA1	SWI/SNF related, matrix associated, actin dependent regulator of chromatin, subfamily a, member 1
0.0367928	chrX	114969014	114970014	39.6029	Intron (NR_147172, Intron 2 of 2)	12217	106029310	DANT1	DXZ4 associated Non-coding transcript 1, proximal
0.0371367	chrX	114070666	114071665	7.25608	Intron (NM_001256761, Intron 4 of 5)	13148	554212	MIR448	microRNA 448
0.0377754	chrX	24665045	24666044	7.20918	Promoter-TSS (NM_004845)	-80	9468	PCYT1B	phosphate cytidylyltransferase 1, choline, beta
0.0383452	chrX	55934060	55935059	7.03774	Promoter-TSS (NM_001324105)	3	11279	KLF8	Kruppel like factor 8
0.038669	chrX	153387022	153388054	9.1306	Intergenic	-22179	5956	OPN1LW	opsin 1, long wave sensitive
0.0415684	chrX	117786521	117787520	6.24571	Intron (NM_144658, Intron 42 of 52)	-74549	3597	IL13RA1	interleukin 13 receptor subunit alpha 1
0.0418591	chrX	82068315	82069371	12.8586	Intergenic	-694455	5456	POU3F4	POU class 3 homeobox 4
0.042236	chrX	18117565	18118631	11.7863	Intron (NR_133641, Intron 1 of 4)	4666	105373144	LINC01456	long intergenic non-protein coding RNA 1456
0.0423244	chrX	4748600	4749599	5.88603	Intergenic	-197486	101928201	LOC101928201	uncharacterized LOC101928201
0.0425589	chrX	71265447	71266466	6.99735	Intron (NM_001013627, Intron 1 of 7)	1697	441502	RPS26P11	ribosomal protein S26 pseudogene 11
0.0429078	chrX	22135969	22137096	7.62978	Intron (NM_000444, Intron 11 of 21)	54568	100873942	PHEX-AS1	PHEX antisense RNA 1
0.0444741	chrX	153008822	153009831	19.5433	3' UTR (NM_000033, Exon 10 of 10)	19015	215	ABCD1	ATP binding cassette subfamily D member 1
0.0454672	chrX	12759195	12760214	8.91376	Intergenic	-49770	5634	PRPS2	phosphoribosyl pyrophosphate synthetase 2
0.0455687	chrX	115056812	115057834	10.3082	Intron (NR_130730, Intron 2 of 2)	28121	642776	DANT2	DXZ4 associated Non-coding transcript 2, distal
0.0473041	chrX	39834518	39835517	5.53663	Intergenic	121702	54880	BCOR	BCL6 corepressor
0.0478839	chrX	141774251	141775250	4.44954	Intergenic	-338964	441525	SPANXN4	SPANX family member N4
0.0480791	chrX	131253417	131254483	12.3956	Intron (NM_194277, Intron 1 of 11)	8098	90167	FRMD7	FERM domain containing 7
0.0492472	chrX	40333067	40334066	7.31831	Intergenic	-106656	10159	ATP6AP2	ATPase H+ transporting accessory protein 2
0.0502877	chrX	23948938	23949946	8.2826	Intron (NM_001169574, Intron 6 of 8)	23319	254158	CXorf58	chromosome X open reading frame 58
0.0511127	chrX	102965888	102966891	12.6189	Intron (NM_182541, Intron 1 of 2)	552	203562	TMEM31	transmembrane protein 31
0.052417	chrX	149588762	149589764	8.12397	Intron (NM_001177465, Intron 1 of 4)	-24457	10046	MAMLD1	mastermind like domain containing 1
0.0527297	chrX	77726856	77727859	4.74996	Intergenic	-144169	10800	CYSLTR1	cysteinyl leukotriene receptor 1
0.0534983	chrX	123890484	123891508	9.16418	Intron (NM_014253, Intron 3 of 30)	206670	10178	TENM1	teneurin transmembrane protein 1
0.0549108	chrX	110228342	110229341	4.39955	Intron (NM_001128167, Intron 1 of 14)	41216	5063	PAK3	p21 (RAC1) activated kinase 3
0.0554367	chrX	88141650	88142675	11.295	Intergenic	139936	53336	CPXCR1	CPX chromosome region candidate 1
0.0597948	chrX	95661749	95663224	14.9133	Intergenic	-69585	643486	BRDTP1	bromodomain testis associated pseudogene 1
0.0606335	chrX	109848678	109850070	7.31737	Intergenic	85834	6998	TDGF1P3	teratocarcinoma-derived growth factor 1 pseudogene 3
0.0609961	chrX	117907435	117908439	7.80001	Exon (NM_001560, Exon 9 of 11)	46368	3597	IL13RA1	interleukin 13 receptor subunit alpha 1
0.0633042	chrX	62739005	62740004	5.41349	Intron (NR_152610, Intron 1 of 4)	41471	92249	LINC01278	long intergenic non-protein coding RNA 1278
0.0634265	chrX	153769036	153770037	20.306	Promoter-TSS (NM_001321396)	-891	8517	IKBKG	inhibitor of nuclear factor kappa B kinase regulatory subunit gamma
0.064542	chrX	134730137	134731136	4.29597	Intergenic	-76037	100874118	INTS6L-AS1	INTS6L antisense RNA 1
0.0751356	chrX	141571478	141572477	4.02294	Intergenic	-278901	51438	MAGEC2	MAGE family member C2
0.0788167	chrX	106399015	106400031	5.54845	Intron (NM_017681, Intron 4 of 8)	-37471	55285	RBM41	RNA binding motif protein 41
0.0837845	chrX	148474104	148475103	8.47288	Intergenic	112233	3423	IDS	iduronate 2-sulfatase
0.0967473	chrX	96092485	96093484	6.11132	Intron (NM_007309, Intron 4 of 26)	-45923	29935	RPA4	replication protein A4
0.0968619	chrX	41977964	41978963	4.3462	Intergenic	-195656	8573	CASK	calcium/calmodulin dependent serine protein kinase
0.0988857	chrX	18137671	18138681	5.60652	Intergenic	-15412	105373144	LINC01456	long intergenic non-protein coding RNA 1456
0.105345	chrX	19390002	19391300	10.4215	Intron (NM_001001671, Intron 22 of 28)	28606	5160	PDHA1	pyruvate dehydrogenase E1 alpha 1 subunit
0.106175	chrX	57312643	57313737	17.6412	Promoter-TSS (NM_174912)	80	158584	FAAH2	fatty acid amide hydrolase 2
0.108177	chrX	24020607	24021606	4.44424	Intron (NM_030624, Intron 3 of 3)	24197	80311	KLHL15	kelch like family member 15
0.115338	chrX	132088092	132089091	5.89522	Intron (NM_001077188, Intron 3 of 5)	6807	90161	HS6ST2	heparan sulfate 6-O-sulfotransferase 2
0.118935	chrX	127011683	127012682	5.57738	Intergenic	174200	139741	ACTRT1	actin related protein T1
0.122647	chrX	153175568	153177118	8.58611	Intron (NM_001666, Intron 14 of 21)	6175	554	AVPR2	arginine vasopressin receptor 2
0.127454	chrX	22317991	22319006	8.58526	Intron (NR_073010, Intron 5 of 11)	27468	158506	CBLL2	Cbl proto-oncogene like 2
0.12935	chrX	103614551	103615550	5.68553	Intergenic	-115436	80712	ESX1	ESX homeobox 1
0.131198	chrX	122911284	122912286	14.7497	Intergenic	-44883	57187	THOC2	THO complex 2
0.131768	chrX	115074985	115075984	6.7145	Intron (NR_130730, Intron 1 of 2)	9960	642776	DANT2	DXZ4 associated Non-coding transcript 2, distal
0.133699	chrX	48619859	48620864	7.36601	Intron (NM_001080489, Intron 1 of 3)	210	392465	GLOD5	glyoxalase domain containing 5
0.134744	chrX	131314982	131316075	8.39311	Intergenic	36533	57826	RAP2C	RAP2C, member of RAS oncogene family
0.143711	chrX	121496653	121497652	7.09203	Intergenic	-820944	2892	GRIA3	glutamate ionotropic receptor AMPA type subunit 3
0.144581	chrX	16964182	16965194	9.54417	Promoter-TSS (NM_004726)	-93	9185	REPS2	RALBP1 associated Eps domain containing 2
0.161825	chrX	122936966	122938001	12.7497	Intergenic	-56179	331	XIAP	X-linked inhibitor of apoptosis
0.164571	chrX	71905665	71906664	3.97896	Intron (NM_001172436, Intron 4 of 29)	-2635	101928259	PHKA1-AS1	PHKA1 antisense RNA 1
0.177064	chrX	115371431	115372430	11.6203	Intergenic	69933	186	AGTR2	angiotensin II receptor type 2
0.179113	chrX	128831791	128832790	7.56573	Intergenic	-40665	7512	XPNPEP2	X-prolyl aminopeptidase 2
0.181351	chrX	152997549	152998551	7.80936	Intron (NM_000033, Intron 2 of 9)	7739	215	ABCD1	ATP binding cassette subfamily D member 1
0.185522	chrX	13006613	13007612	7.55341	Intergenic	13883	7114	TMSB4X	thymosin beta 4 X-linked
0.189109	chrX	23825370	23826369	40.2429	Intergenic	24594	6303	SAT1	spermidine/spermine N1-acetyltransferase 1
0.190333	chrX	128739132	128740131	6.53706	Intergenic	49302	8862	APLN	apelin
0.192829	chrX	129463828	129465290	7.17527	Intergenic	-9303	9016	SLC25A14	solute carrier family 25 member 14
0.194223	chrX	150730387	150731426	10.2657	Intergenic	-1241	139135	PASD1	PAS domain containing repressor 1
0.196804	chrX	148593498	148594497	8.43722	Intergenic	-7161	3423	IDS	iduronate 2-sulfatase
0.201577	chrX	131404903	131405905	6.07581	Intron (NR_110410, Intron 2 of 2)	-51896	57826	RAP2C	RAP2C, member of RAS oncogene family
0.201907	chrX	153601547	153602546	27.6927	Intron (NM_001110556, Intron 1 of 47)	956	2316	FLNA	filamin A
0.214493	chrX	138208351	138209350	4.98201	Intron (NM_001139501, Intron 2 of 7)	78335	2258	FGF13	fibroblast growth factor 13
0.216221	chrX	112075644	112076643	7.33986	Intron (NM_133265, Intron 1 of 11)	7916	154796	AMOT	angiomotin
0.219452	chrX	106202830	106203829	3.85167	Intron (NM_024657, Intron 10 of 16)	39697	9075	CLDN2	claudin 2
0.223326	chrX	149862388	149863414	12.4547	Intron (NR_148676, Intron 1 of 16)	1032	8776	MTMR1	myotubularin related protein 1
0.00184738	chr9	92300656	92301731	13.4008	Intron (NR_024280, Intron 3 of 5)	46495	100129066	UNQ6494	uncharacterized LOC100129066
0.00690617	chr9	71137925	71138924	6.38497	Intron (NM_021965, Intron 10 of 10)	17359	169693	TMEM252	transmembrane protein 252
0.00824115	chr9	83935736	83936790	17.493	Intergenic	368187	7088	TLE1	TLE family member 1, transcriptional corepressor
0.00863325	chr9	128058964	128059970	16.1076	Intron (NM_001282680, Intron 3 of 27)	35362	26130	GAPVD1	GTPase activating protein and VPS9 domains 1
0.00982688	chr9	93404858	93405862	10.6616	Promoter-TSS (NM_017594)	-254	54769	DIRAS2	DIRAS family GTPase 2
0.0119404	chr9	92279514	92280515	8.78294	Non-coding (NR_024280, Exon 2 of 6)	25316	100129066	UNQ6494	uncharacterized LOC100129066
0.0120317	chr9	93462252	93463251	4.36724	Intergenic	-57645	54769	DIRAS2	DIRAS family GTPase 2
0.0133286	chr9	92460730	92461772	9.88054	Intergenic	206553	100129066	UNQ6494	uncharacterized LOC100129066
0.014361	chr9	92219309	92220333	16.4583	Promoter-TSS (NM_006705)	-106	10912	GADD45G	growth arrest and DNA damage inducible gamma
0.014801	chr9	92220761	92221772	20.2969	3' UTR (NM_006705, Exon 4 of 4)	1339	10912	GADD45G	growth arrest and DNA damage inducible gamma
0.014865	chr9	109095491	109096490	5.69497	Intergenic	-267219	102465995	MIR8081	microRNA 8081
0.015767	chr9	130980657	130981725	17.9666	Intron (NM_001288739, Intron 3 of 21)	-14690	25792	CIZ1	CDKN1A interacting zinc finger protein 1
0.0158736	chr9	36273113	36274112	9.96843	Intron (NM_001128227, Intron 1 of 11)	3363	10020	GNE	glucosamine (UDP-N-acetyl)-2-epimerase/N-acetylmannosamine kinase
0.016173	chr9	132082700	132083700	9.82586	Promoter-TSS (NR_149714)	-95	414318	C9orf106	chromosome 9 open reading frame 106 (putative)
0.0172339	chr9	93563588	93564587	10.8627	Promoter-TSS (NM_003177)	-14	6850	SYK	spleen associated tyrosine kinase
0.0192293	chr9	95570668	95572006	10.701	Promoter-TSS (NR_136301)	-556	138649	ANKRD19P	ankyrin repeat domain 19, pseudogene
0.0193093	chr9	20657796	20658809	12.9943	Promoter-TSS (NM_017794)	-6	54914	FOCAD	focadhesin
0.0198477	chr9	95673806	95674811	7.97778	Intergenic	29459	642943	LOC642943	SPATA31 subfamily A pseudogene
0.0199565	chr9	83986463	83987462	7.46075	Intergenic	317488	7088	TLE1	TLE family member 1, transcriptional corepressor
0.0218399	chr9	72260162	72261175	9.12348	Intron (NM_001163, Intron 1 of 12)	26619	320	APBA1	amyloid beta precursor protein binding family A member 1
0.022244	chr9	87470693	87471888	7.19694	Intron (NM_001018064, Intron 12 of 17)	150474	4915	NTRK2	neurotrophic receptor tyrosine kinase 2
0.0262363	chr9	31937380	31938382	13.7821	Intergenic	-446720	48	ACO1	aconitase 1
0.0281095	chr9	87282816	87283815	9.42984	Promoter-TSS (NM_001369533)	-58	4915	NTRK2	neurotrophic receptor tyrosine kinase 2
0.0290895	chr9	25518990	25519989	5.53306	Intergenic	159367	286319	TUSC1	tumor suppressor candidate 1
0.0292208	chr9	100834085	100835597	17.5862	Intron (NM_018946, Intron 2 of 5)	15827	54187	NANS	N-acetylneuraminate synthase
0.0292252	chr9	131177732	131178731	12.431	Intron (NR_031672, Intron 2 of 2).3	-3208	51148	CERCAM	cerebral endothelial cell adhesion molecule
0.030476	chr9	5303795	5304822	10.9765	Promoter-TSS (NM_001329191)	-80	6019	RLN2	relaxin 2
0.0315934	chr9	90381276	90382286	10.4146	Intergenic	-6049	392360	CTSL3P	cathepsin L family member 3, pseudogene
0.0331795	chr9	92276510	92277514	11.0198	Intron (NR_024280, Intron 1 of 5)	22314	100129066	UNQ6494	uncharacterized LOC100129066
0.0341323	chr9	126089645	126090699	12.4764	Intergenic	-28304	286204	CRB2	crumbs cell polarity complex component 2
0.0349738	chr9	85781020	85782082	19.4394	Intergenic	100632	257019	FRMD3	FERM domain containing 3
0.0364079	chr9	23598648	23599647	8.28172	Intron (NR_121602, Intron 11 of 27)	73250	101929563	LOC101929563	uncharacterized LOC101929563
0.0366815	chr9	124764782	124765781	6.15054	Intron (NM_194252, Intron 3 of 3)	90604	158135	TTLL11	tubulin tyrosine ligase like 11
0.036711	chr9	131607026	131608073	22.9622	Intron (NM_001352999, Intron 2 of 12)	480	883	KYAT1	kynurenine aminotransferase 1
0.03685	chr9	86613782	86614781	3.79833	Intron (NM_001358293, Intron 2 of 3)	18561	80010	RMI1	RecQ mediated genome instability 1
0.0381865	chr9	100934485	100935545	10.2107	5' UTR (NM_003389, Exon 1 of 12)	159	7464	CORO2A	coronin 2A
0.0384457	chr9	71719714	71720714	9.38329	Intergenic	-15966	9414	TJP2	tight junction protein 2
0.0384913	chr9	91494703	91495759	7.17507	Intergenic	-110547	286223	C9orf47	chromosome 9 open reading frame 47
0.0393646	chr9	19404404	19405458	14.2876	Intergenic	-4076	340485	ACER2	alkaline ceramidase 2
0.0393925	chr9	71319559	71320568	5.44793	Promoter-TSS (NM_003558)	-93	8395	PIP5K1B	phosphatidylinositol-4-phosphate 5-kinase type 1 beta
0.0397967	chr9	103869439	103870438	4.89372	Intron (NM_207299, Intron 1 of 7)	-77379	54886	PLPPR1	phospholipid phosphatase related 1
0.0415366	chr9	136253252	136254256	20.6278	Intron (NR_103997, Intron 6 of 13)	-8934	6836	SURF4	surfeit 4
0.041833	chr9	5338974	5339980	12.1856	Intron (NM_006911, Intron 1 of 1)	399	6013	RLN1	relaxin 1
0.0426818	chr9	71120665	71121664	8.18031	Intron (NM_021965, Intron 10 of 10)	34619	169693	TMEM252	transmembrane protein 252
0.0438055	chr9	97545061	97546151	13.8795	Intron (NM_001193331, Intron 3 of 7)	23675	84909	AOPEP	aminopeptidase O (putative)
0.0441562	chr9	998270	999350	16.7499	Intergenic	22155	58524	DMRT3	doublesex and mab-3 related transcription factor 3
0.0463838	chr9	76129829	76130828	5.64055	Intergenic	363547	301	ANXA1	annexin A1
0.0470472	chr9	66518851	66519867	11.8417	Intron (NR_122076, Intron 4 of 5)	22890	442421	PTGER4P2-CDK2AP2P2	PTGER4P2-CDK2AP2P2 readthrough, transcribed pseudogene
0.047446	chr9	45462203	45463340	8.46078	Intron (NR_148348, Intron 1 of 2)	20886	107984035	LOC107984035	uncharacterized LOC107984035
0.0479301	chr9	132813737	132814740	9.82623	Intergenic	-1747	57720	GPR107	G protein-coupled receptor 107
0.0480959	chr9	92761178	92762946	10.6857	Intergenic	23755	100422963	MIR4290	microRNA 4290
0.0491128	chr9	935045	936066	10.2234	Intron (NM_021951, Intron 4 of 4)	-41100	58524	DMRT3	doublesex and mab-3 related transcription factor 3
0.0506265	chr9	68454737	68455924	17.0374	Promoter-TSS (NR_033907)	38	642236	FRG1JP	FSHD region gene 1 family member J, pseudogene
0.0512241	chr9	91556251	91557251	11.9532	Intergenic	-49027	286223	C9orf47	chromosome 9 open reading frame 47
0.051783	chr9	92680979	92682002	14.6897	Intergenic	-50208	101927847	LOC101927847	uncharacterized LOC101927847
0.0520099	chr9	92050076	92051126	16.9872	Intron (NM_006378, Intron 2 of 17)	44204	10507	SEMA4D	semaphorin 4D
0.0523904	chr9	11064617	11065705	9.02073	Intergenic	451955	101929428	PTPRD-AS2	PTPRD antisense RNA 2 (head to head)
0.0526639	chr9	131033096	131034095	9.56326	Intron (NM_004486, Intron 2 of 25)	-4063	375757	SWI5	SWI5 homologous recombination repair protein
0.0538737	chr9	131060762	131061761	11.5693	Intergenic	22836	375757	SWI5	SWI5 homologous recombination repair protein
0.0542198	chr9	112093393	112094407	7.36742	Intergenic	-10656	54566	EPB41L4B	erythrocyte membrane protein band 4.1 like 4B
0.0558854	chr9	25551262	25552265	7.44023	Intergenic	127093	286319	TUSC1	tumor suppressor candidate 1
0.0560137	chr9	33415210	33416212	24.0101	Intergenic	-13031	364	AQP7	aquaporin 7
0.0561073	chr9	131012302	131013397	17.318	Intron (NM_001288739, Intron 20 of 21)	-5540	100422893	MIR3154	microRNA 3154
0.0561942	chr9	100657874	100658899	6.68544	Intergenic	26466	51531	TRMO	tRNA methyltransferase O
0.0566407	chr9	5683335	5684334	8.75004	Intron (NM_001206557, Intron 2 of 24)	54715	57589	RIC1	RIC1 homolog, RAB6A GEF complex partner 1
0.057542	chr9	99041990	99042989	5.63651	Intron (NM_000197, Intron 2 of 10)	21969	3293	HSD17B3	hydroxysteroid 17-beta dehydrogenase 3
0.0576475	chr9	92207593	92209454	8.85419	Intergenic	-11404	10912	GADD45G	growth arrest and DNA damage inducible gamma
0.0605495	chr9	4932845	4933872	9.598	Intergenic	-51728	3717	JAK2	Janus kinase 2
0.0680101	chr9	139433755	139434847	22.7483	Intron (NM_017617, Intron 2 of 33)	6199	4851	NOTCH1	notch receptor 1
0.0686663	chr9	71355115	71356229	6.38941	Intron (NM_001278253, Intron 1 of 13)	35342	8395	PIP5K1B	phosphatidylinositol-4-phosphate 5-kinase type 1 beta
0.0692915	chr9	72120592	72121591	5.46157	Intron (NM_001163, Intron 2 of 12)	166196	320	APBA1	amyloid beta precursor protein binding family A member 1
0.0693235	chr9	112051928	112052927	4.33732	Intron (NM_019114, Intron 1 of 25)	30817	54566	EPB41L4B	erythrocyte membrane protein band 4.1 like 4B
0.0715671	chr9	122174364	122175428	10.0548	Intergenic	-43183	1620	BRINP1	BMP/retinoic acid inducible neural specific 1
0.0715819	chr9	21381738	21382748	5.87616	Intergenic	3154	3440	IFNA2	interferon alpha 2
0.0733544	chr9	3826846	3827877	10.7989	3' UTR (NM_152629, Exon 10 of 10)	-71285	84850	GLIS3-AS1	GLIS3 antisense RNA 1
0.0739385	chr9	97580218	97582213	9.17092	Intron (NM_032823, Intron 5 of 14)	8971	100313780	MIR2278	microRNA 2278
0.0742238	chr9	127321837	127322836	4.3763	Intron (NM_033334, Intron 2 of 9)	-52658	2516	NR5A1	nuclear receptor subfamily 5 group A member 1
0.0773949	chr9	72004238	72005237	5.97296	Intron (NM_001127608, Intron 10 of 10)	60496	9413	FAM189A2	family with sequence similarity 189 member A2
0.0774927	chr9	4753764	4754944	10.8068	Intergenic	-12311	50808	AK3	adenylate kinase 3
0.0789783	chr9	25075920	25076926	5.31534	Intergenic	-530528	100129669	IZUMO3	IZUMO family member 3
0.079346	chr9	96074914	96075947	21.6155	Intron (NM_001282394, Intron 28 of 29)	33155	445577	C9orf129	chromosome 9 open reading frame 129
0.0795471	chr9	92989036	92990044	13.3564	Intergenic	-185759	286370	MIR4290HG	MIR4290 host gene
0.0811974	chr9	137248555	137250051	24.8385	Intron (NM_002957, Intron 1 of 9)	-21838	6256	RXRA	retinoid X receptor alpha
0.0821585	chr9	93517433	93518439	13.1845	Intergenic	-45946	6850	SYK	spleen associated tyrosine kinase
0.0828525	chr9	114619497	114620523	6.37115	Intergenic	-39084	7357	UGCG	UDP-glucose ceramide glucosyltransferase
0.0858566	chr9	89165619	89166656	10.9161	Intergenic	-196812	79670	TUT7	terminal uridylyl transferase 7
0.0859476	chr9	128034650	128035649	5.32248	Intron (NR_148733, Intron 2 of 26)	11044	26130	GAPVD1	GTPase activating protein and VPS9 domains 1
0.0901026	chr9	134180072	134181079	10.0232	Intron (NM_032728, Intron 1 of 1)	15465	84814	PLPP7	phospholipid phosphatase 7 (inactive)
0.0919225	chr9	1017807	1018806	4.44855	Intergenic	-29837	102800446	LINC01230	long intergenic non-protein coding RNA 1230
0.0929099	chr9	86869598	86870597	4.75761	Intergenic	85576	64078	SLC28A3	solute carrier family 28 member 3
0.0931162	chr9	82104178	82105186	17.9403	Intergenic	-82006	7091	TLE4	TLE family member 4, transcriptional corepressor
0.09319	chr9	80203989	80204996	11.5772	Intron (NM_004297, Intron 1 of 6)	58746	9630	GNA14	G protein subunit alpha 14
0.0937293	chr9	37403497	37404496	6.31248	Intergenic	-18697	9380	GRHPR	glyoxylate and hydroxypyruvate reductase
0.0938455	chr9	94913862	94914980	17.7647	Intron (NR_027341, Intron 1 of 3)	10672	158314	LINC00475	long intergenic non-protein coding RNA 475
0.0946095	chr9	117320300	117321299	4.44173	Intergenic	-29250	9550	ATP6V1G1	ATPase H+ transporting V1 subunit G1
0.0952377	chr9	763733	764737	14.4551	Intergenic	57558	23189	KANK1	KN motif and ankyrin repeat domains 1
0.095771	chr9	116303133	116304132	5.47461	Exon (NM_017790, Exon 18 of 18)	4741	5998	RGS3	regulator of G protein signaling 3
0.0974849	chr9	112968865	112969864	6.88798	Intron (NM_001012993, Intron 1 of 1)	1049	401546	C9orf152	chromosome 9 open reading frame 152
0.0983301	chr9	86237547	86238580	13.1638	Promoter-TSS (NR_046422)	5	414328	IDNK	IDNK gluconokinase
0.0986061	chr9	136114151	136115162	11.7741	Intergenic	-30019	29989	OBP2B	odorant binding protein 2B
0.102884	chr9	87404022	87405021	6.47417	Intron (NM_001369547, Intron 13 of 13)	83705	4915	NTRK2	neurotrophic receptor tyrosine kinase 2
0.104106	chr9	116342560	116343575	13.5443	Promoter-TSS (NM_001282922)	-141	5998	RGS3	regulator of G protein signaling 3
0.105081	chr9	71361580	71362579	8.10149	Intron (NM_003558, Intron 2 of 15)	-32902	116224	FAM122A	family with sequence similarity 122A
0.106972	chr9	117300214	117301213	4.98413	Intergenic	-32960	25861	WHRN	whirlin
0.108293	chr9	967580	968640	7.1389	Exon (NM_001363767, Exon 5 of 5)	-8545	58524	DMRT3	doublesex and mab-3 related transcription factor 3
0.11065	chr9	87568686	87569687	6.43404	Intron (NM_001018064, Intron 15 of 17)	248370	4915	NTRK2	neurotrophic receptor tyrosine kinase 2
0.114071	chr9	132144908	132146498	11.4385	Intergenic	46501	100506119	LINC01503	long intergenic non-protein coding RNA 1503
0.114227	chr9	37498425	37499424	4.56441	Intron (NM_022490, Intron 9 of 11)	12979	64425	POLR1E	RNA polymerase I subunit E
0.11505	chr9	88708364	88709408	9.40584	Intron (NM_177937, Intron 1 of 9)	5587	51280	GOLM1	golgi membrane protein 1
0.117603	chr9	140204757	140206563	43.6599	Intron (NM_017820, Intron 19 of 21)	-8937	441478	NRARP	NOTCH regulated ankyrin repeat protein
0.117716	chr9	88772004	88773003	5.65195	TTS (NR_110996)	30048	101927623	LOC101927623	uncharacterized LOC101927623
0.118466	chr9	85024936	85025956	4.83751	Intergenic	421759	389763	SPATA31D1	SPATA31 subfamily D member 1
0.119913	chr9	139919782	139920781	11.4794	Intron (NM_212533, Intron 1 of 48)	-1635	401563	C9orf139	chromosome 9 open reading frame 139
0.124507	chr9	97681463	97682836	21.8797	Intron (NM_032823, Intron 5 of 14)	25687	101928119	LOC101928119	uncharacterized LOC101928119
0.125626	chr9	96339634	96340633	13.0677	Intron (NM_005392, Intron 1 of 21)	1267	5253	PHF2	PHD finger protein 2
0.132455	chr9	126346792	126347834	6.11747	Intron (NM_001352968, Intron 10 of 18)	-99412	102465688	MIR7150	microRNA 7150
0.132674	chr9	129514338	129515337	4.45139	Intergenic	-52448	23099	ZBTB43	zinc finger and BTB domain containing 43
0.135582	chr9	74373375	74374412	11.7581	Intron (NM_001349784, Intron 1 of 23)	9536	23670	CEMIP2	cell migration inducing hyaluronidase 2
0.137396	chr9	34484423	34485422	4.14002	Intron (NM_001281428, Intron 2 of 19)	26119	27019	DNAI1	dynein axonemal intermediate chain 1
0.138389	chr9	77555176	77556175	5.20151	Intergenic	12153	55071	C9orf40	chromosome 9 open reading frame 40
0.14006	chr9	335702	336701	7.86663	Intron (NM_203447, Intron 11 of 47)	63153	81704	DOCK8	dedicator of cytokinesis 8
0.140904	chr9	34509440	34510439	5.05908	Intron (NM_001281428, Intron 13 of 19)	13049	375704	ENHO	energy homeostasis associated
0.14112	chr9	89144067	89145066	4.73744	Intergenic	-175241	79670	TUT7	terminal uridylyl transferase 7
0.142401	chr9	2291991	2292990	7.39114	Intergenic	134034	6595	SMARCA2	SWI/SNF related, matrix associated, actin dependent regulator of chromatin, subfamily a, member 2
0.14788	chr9	119455051	119456162	6.22044	Intron (NM_001099679, Intron 1 of 1)	6022	22954	TRIM32	tripartite motif containing 32
0.153678	chr9	34072074	34073088	12.0844	Intergenic	-23384	55833	UBAP2	ubiquitin associated protein 2
0.155409	chr9	129424330	129425606	16.6983	Intron (NM_001174147, Intron 2 of 7)	48246	4010	LMX1B	LIM homeobox transcription factor 1 beta
0.156605	chr9	115526797	115527814	9.11477	Intron (NM_001012994, Intron 1 of 8)	14265	401548	SNX30	sorting nexin family member 30
0.157958	chr9	138863481	138864515	6.41247	Intergenic	-10779	10422	UBAC1	UBA domain containing 1
0.159468	chr9	76059498	76060497	5.8568	Intergenic	293216	301	ANXA1	annexin A1
0.161345	chr9	136554920	136555940	10.9417	Intron (NM_001134707, Intron 16 of 20)	-32900	138948	DBH-AS1	DBH antisense RNA 1
0.163569	chr9	136745942	136746959	13.5112	Intron (NM_001134398, Intron 2 of 29)	110996	7410	VAV2	vav guanine nucleotide exchange factor 2
0.163862	chr9	128046435	128047434	7.2704	Intron (NR_148733, Intron 2 of 26)	22829	26130	GAPVD1	GTPase activating protein and VPS9 domains 1
0.167808	chr9	90870833	90871883	11.7033	Intergenic	-117962	645961	SPATA31C2	SPATA31 subfamily C member 2
0.168448	chr9	140444417	140445436	20.0312	Promoter-TSS (NM_152286)	-72	375775	PNPLA7	patatin like phospholipase domain containing 7
0.168922	chr9	139589497	139590569	19.9738	Intergenic	-8124	10555	AGPAT2	1-acylglycerol-3-phosphate O-acyltransferase 2
0.169023	chr9	135457168	135458192	6.10754	Promoter-TSS (NM_020064)	-313	56751	BARHL1	BarH like homeobox 1
0.17266	chr9	97315073	97316072	13.3806	Intergenic	-1755	101928099	PCAT7	prostate cancer associated transcript 7
0.177481	chr9	138654069	138655068	5.64627	Intron (NM_001272003, Intron 10 of 30)	60537	57582	KCNT1	potassium sodium-activated channel subfamily T member 1
0.181048	chr9	89733888	89734920	6.93988	Intergenic	-29155	401535	C9orf170	chromosome 9 open reading frame 170
0.181341	chr9	27053288	27054287	7.20094	Intron (NM_025103, Intron 16 of 19)	-48117	64922	LRRC19	leucine rich repeat containing 19
0.181712	chr9	140111363	140112362	12.0263	3' UTR (NM_014434, Exon 14 of 14)	3913	727800	RNF208	ring finger protein 208
0.183142	chr9	80493919	80495231	7.20407	Intron (NM_002072, Intron 2 of 6)	152152	2776	GNAQ	G protein subunit alpha q
0.188988	chr9	138330172	138331171	6.26944	Intergenic	33424	100506599	PPP1R26-AS1	PPP1R26 antisense RNA 1
0.189349	chr9	5719008	5720157	12.2477	Intron (NM_001206557, Intron 4 of 24)	90463	57589	RIC1	RIC1 homolog, RAB6A GEF complex partner 1
0.190013	chr9	89827055	89828078	9.17141	Intergenic	64007	401535	C9orf170	chromosome 9 open reading frame 170
0.191074	chr9	128298083	128299128	11.1101	Intron (NM_001006618, Intron 7 of 7)	170882	79109	MAPKAP1	MAPK associated protein 1
0.194812	chr9	3740434	3741780	14.6262	Intergenic	73021	101929302	RFX3-AS1	RFX3 antisense RNA 1
0.201717	chr9	117670002	117671074	34.2946	Intron (NM_001244, Intron 2 of 3)	22337	944	TNFSF8	TNF superfamily member 8
0.204263	chr9	1049728	1050830	51.2438	Promoter-TSS (NM_181872)	-75	10655	DMRT2	doublesex and mab-3 related transcription factor 2
0.213623	chr9	130717362	130718368	36.4578	Intron (NM_001035254, Intron 1 of 10)	-4872	399665	FAM102A	family with sequence similarity 102 member A
0.21798	chr9	108675097	108676096	7.56619	Intergenic	218774	55151	TMEM38B	transmembrane protein 38B
0.218517	chr9	140070703	140071702	9.69534	Intron (NM_013366, Intron 10 of 12)	-4694	100505993	TMEM210	transmembrane protein 210
0.219514	chr9	92864277	92865276	6.97787	Intergenic	-60995	286370	MIR4290HG	MIR4290 host gene
0.227133	chr9	33229062	33230099	24.4659	Intergenic	-10585	27290	SPINK4	serine peptidase inhibitor, Kazal type 4
0.227867	chr9	136596612	136597624	6.87218	Intron (NM_001134707, Intron 3 of 20)	6356	1757	SARDH	sarcosine dehydrogenase
0.234272	chr9	120249447	120250446	4.53431	Intergenic	-72611	23245	ASTN2	astrotactin 2
0.239884	chr9	131788517	131789516	15.8525	Intron (NM_001369914, Intron 1 of 10)	1594	56904	SH3GLB2	SH3 domain containing GRB2 like, endophilin B2
0.24337	chr9	114287556	114288555	8.85466	Intron (NM_133464, Intron 1 of 5)	596	158399	ZNF483	zinc finger protein 483
0.243587	chr9	137914951	137915972	11.5527	Intergenic	-51890	10439	OLFM1	olfactomedin 1
0.000194531	chr8	8318417	8319438	10.4483	Intergenic	-74978	157285	PRAG1	PEAK1 related, kinase-activating pseudokinase 1
0.00382002	chr8	103243491	103244491	38.1642	Intron (NM_001172478, Intron 1 of 7)	7068	50484	RRM2B	ribonucleotide reductase regulatory TP53 inducible subunit M2B
0.00610131	chr8	19278877	19279876	6.87758	Intron (NM_001354475, Intron 6 of 9)	107889	63898	SH2D4A	SH2 domain containing 4A
0.0064126	chr8	17660022	17661544	19.301	Intergenic	-1695	57509	MTUS1	microtubule associated scaffold protein 1
0.00651913	chr8	102504058	102505119	97.2899	Promoter-TSS (NM_001330593)	-79	79977	GRHL2	grainyhead like transcription factor 2
0.00692632	chr8	77220337	77221336	28.8009	Intergenic	-98053	101926978	LINC01111	long intergenic non-protein coding RNA 1111
0.00771564	chr8	90889123	90890127	13.0901	Intergenic	-24471	734	OSGIN2	oxidative stress induced growth inhibitor family member 2
0.00778102	chr8	11665386	11666993	11.7096	Promoter-TSS (NM_001287751)	263	2222	FDFT1	farnesyl-diphosphate farnesyltransferase 1
0.00850755	chr8	95650926	95651982	46.459	Non-coding (NR_034034, Exon 1 of 1)	241	100288748	LOC100288748	uncharacterized LOC100288748
0.00919948	chr8	76236078	76237084	16.0636	Intergenic	-45457	101805492	CASC9	cancer susceptibility 9
0.00926764	chr8	30196760	30197764	11.2755	Intergenic	-44755	11030	RBPMS	RNA binding protein, mRNA processing factor
0.00948748	chr8	29184455	29185637	10.5628	Intergenic	21276	1846	DUSP4	dual specificity phosphatase 4
0.00952492	chr8	102505679	102506678	26.4601	Intron (NM_001330593, Intron 1 of 15)	1511	79977	GRHL2	grainyhead like transcription factor 2
0.0101173	chr8	100916890	100917904	19.6925	Intergenic	-11462	1345	COX6C	cytochrome c oxidase subunit 6C
0.0128905	chr8	115597605	115598605	31.0054	Intergenic	1082135	7227	TRPS1	transcriptional repressor GATA binding 1
0.0152116	chr8	88240884	88241883	8.35065	Intron (NM_173538, Intron 5 of 10)	362740	168975	CNBD1	cyclic nucleotide binding domain containing 1
0.0156433	chr8	135755691	135756723	9.80324	Intergenic	-30933	57623	ZFAT	zinc finger and AT-hook domain containing
0.0158207	chr8	81278778	81279830	13.6136	Intergenic	-118524	65986	ZBTB10	zinc finger and BTB domain containing 10
0.0161423	chr8	29144072	29145114	27.0343	Intergenic	-24006	23303	KIF13B	kinesin family member 13B
0.0162368	chr8	94114293	94115491	10.8635	Intergenic	64187	389676	C8orf87	chromosome 8 open reading frame 87
0.0164415	chr8	91410788	91411794	40.0583	Intergenic	177575	100874052	LINC00534	long intergenic non-protein coding RNA 534
0.0164484	chr8	124455079	124456084	48.703	Intron (NR_133926, Intron 6 of 6)	26567	55093	WDYHV1	WDYHV motif containing 1
0.0166293	chr8	25902445	25903471	11.7931	Promoter-TSS (NM_022659)	-29	64641	EBF2	EBF transcription factor 2
0.0171204	chr8	102448955	102449959	51.4696	Intergenic	-55210	79977	GRHL2	grainyhead like transcription factor 2
0.0176811	chr8	17693704	17694703	5.97687	Intergenic	-35115	57509	MTUS1	microtubule associated scaffold protein 1
0.0180958	chr8	127621475	127622478	16.3989	Intergenic	-51253	157638	LRATD2	LRAT domain containing 2
0.0182348	chr8	30252834	30253848	8.01917	Intron (NM_001008710, Intron 1 of 8)	-10424	100128750	RBPMS-AS1	RBPMS antisense RNA 1
0.0186464	chr8	96097750	96098780	19.8848	Intron (NR_148914, Intron 9 of 11)	-12855	105375650	MIR3150BHG	MIR3150B host gene
0.0186699	chr8	66932591	66933806	17.0981	Promoter-TSS (NR_146171)	-590	85479	DNAJC5B	DnaJ heat shock protein family (Hsp40) member C5 beta
0.0186709	chr8	95654202	95655201	28.412	Intron (NM_001034915, Intron 2 of 15)	1299	54845	ESRP1	epithelial splicing regulatory protein 1
0.0204172	chr8	25903743	25904742	7.80611	Intergenic	-1313	64641	EBF2	EBF transcription factor 2
0.0207875	chr8	87270415	87271420	10.1481	Intergenic	-28307	157724	SLC7A13	solute carrier family 7 member 13
0.0208447	chr8	8902277	8903281	13.1899	Intron (NM_001354638, Intron 6 of 7)	-3176	100616350	MIR4660	microRNA 4660
0.0216683	chr8	116999651	117000659	45.9598	Intron (NR_046215, Intron 7 of 13)	-318953	7227	TRPS1	transcriptional repressor GATA binding 1
0.0217683	chr8	99702671	99703670	6.85195	Intron (NM_001256313, Intron 4 of 8)	134729	6788	STK3	serine/threonine kinase 3
0.0217908	chr8	129164910	129165935	25.6865	Intergenic	3060	100302281	MIR1208	microRNA 1208
0.0223323	chr8	110128595	110129612	6.56442	Intron (NM_003301, Intron 2 of 2)	30246	7201	TRHR	thyrotropin releasing hormone receptor
0.0223538	chr8	89427303	89428362	10.842	Intergenic	-88120	4325	MMP16	matrix metallopeptidase 16
0.0223768	chr8	127816908	127818270	9.75936	Intergenic	-207810	100750225	PCAT1	prostate cancer associated transcript 1
0.0223973	chr8	120124206	120125231	16.0015	Intergenic	-43697	101927513	LOC101927513	uncharacterized LOC101927513
0.0226087	chr8	89994991	89996023	7.19331	Intergenic	-655795	4325	MMP16	matrix metallopeptidase 16
0.0248217	chr8	95980181	95981198	12.2041	Intron (NM_001354515, Intron 2 of 9)	18901	137682	NDUFAF6	NADH:ubiquinone oxidoreductase complex assembly factor 6
0.0249959	chr8	101499794	101500796	23.8393	Intergenic	71692	157567	ANKRD46	ankyrin repeat domain 46
0.0250656	chr8	102450350	102451380	33.0335	Intergenic	-53802	79977	GRHL2	grainyhead like transcription factor 2
0.0251636	chr8	105174388	105175387	8.05363	Intron (NM_001348490, Intron 23 of 27)	-60676	9699	RIMS2	regulating synaptic membrane exocytosis 2
0.0252297	chr8	96078968	96079978	67.5652	Non-coding (NR_132987, Exon 2 of 2)	-5669	100422964	MIR3150A	microRNA 3150a
0.0255997	chr8	88178218	88179217	6.68375	Intron (NM_173538, Intron 4 of 10)	300074	168975	CNBD1	cyclic nucleotide binding domain containing 1
0.0264309	chr8	116878847	116879916	29.4865	Intergenic	-198179	7227	TRPS1	transcriptional repressor GATA binding 1
0.0265721	chr8	134780814	134781897	40.6917	Intergenic	8240	101927798	LOC101927798	uncharacterized LOC101927798
0.0265792	chr8	22659	23658	10.899	Intergenic	93866	441308	OR4F21	olfactory receptor family 4 subfamily F member 21
0.0268437	chr8	26000403	26001451	10.2661	Intergenic	-97998	64641	EBF2	EBF transcription factor 2
0.0270645	chr8	102372826	102373841	14.4838	Intergenic	-7788	83955	NACA4P	NACA family member 4, pseudogene
0.027441	chr8	87211539	87212538	7.40326	Intergenic	30572	157724	SLC7A13	solute carrier family 7 member 13
0.0275119	chr8	96083534	96084538	20.1071	Intron (NR_132986, Intron 1 of 1)	-1106	100422964	MIR3150A	microRNA 3150a
0.0278647	chr8	80894481	80895539	18.8308	Intron (NM_014018, Intron 2 of 2)	47484	28957	MRPS28	mitochondrial ribosomal protein S28
0.0280675	chr8	101135673	101136690	20.3951	Intergenic	-17904	26166	RGS22	regulator of G protein signaling 22
0.0283126	chr8	95417206	95418205	26.2859	Intron (NM_012415, Intron 5 of 14)	31467	25788	RAD54B	RAD54 homolog B
0.0283248	chr8	99662054	99663549	5.89462	Intron (NM_001256313, Intron 4 of 8)	175098	6788	STK3	serine/threonine kinase 3
0.0284187	chr8	29097737	29098816	10.1191	Intron (NM_015254, Intron 2 of 39)	22311	23303	KIF13B	kinesin family member 13B
0.0284982	chr8	100717727	100719332	15.7082	Intron (NM_152564, Intron 36 of 61)	-169440	100126309	MIR875	microRNA 875
0.0289827	chr8	99438669	99439668	4.73086	Promoter-TSS (NM_020697)	-18	3788	KCNS2	potassium voltage-gated channel modifier subfamily S member 2
0.0290792	chr8	95668951	95670286	14.3463	Intron (NM_001034915, Intron 4 of 15)	16216	54845	ESRP1	epithelial splicing regulatory protein 1
0.0293389	chr8	122438716	122439715	5.94464	Intergenic	-212371	594842	HAS2-AS1	HAS2 antisense RNA 1
0.0294059	chr8	18036777	18037794	6.08963	Intron (NM_001291962, Intron 2 of 5)	9309	9	NAT1	N-acetyltransferase 1
0.0296521	chr8	61966791	61967808	24.5126	Intergenic	-86992	100130298	LOC100130298	hCG1816373-like
0.0303972	chr8	95652791	95653797	50.9896	Promoter-TSS (NM_001122826)	-108	54845	ESRP1	epithelial splicing regulatory protein 1
0.0305788	chr8	127353794	127354819	15.5002	Intergenic	16566	101927657	LOC101927657	uncharacterized LOC101927657
0.0309205	chr8	102380727	102381775	7.60328	Non-coding (NR_002182, Exon 1 of 1)	130	83955	NACA4P	NACA family member 4, pseudogene
0.0314	chr8	123256278	123257292	19.3101	Intergenic	324098	105375734	SMILR	smooth muscle induced lncRNA, enhancer of proliferation
0.0315198	chr8	129756450	129757821	15.3835	Intergenic	-180210	101927774	LINC00824	long intergenic non-protein coding RNA 824
0.0320259	chr8	81665039	81666043	37.2117	Intron (NM_001033723, Intron 2 of 8)	121162	619279	ZNF704	zinc finger protein 704
0.0320917	chr8	86190891	86191890	6.35904	Intron (NM_198584, Intron 6 of 6)	33703	377677	CA13	carbonic anhydrase 13
0.0330664	chr8	102844588	102845590	11.5533	Intron (NM_001040628, Intron 4 of 7)	-41892	83988	NCALD	neurocalcin delta
0.0332357	chr8	117336653	117337705	13.5903	Non-coding (NR_046215, Exon 1 of 14)	118	100859921	LINC00536	long intergenic non-protein coding RNA 536
0.0341216	chr8	39328324	39329367	7.91931	Intron (NR_073423, Intron 17 of 21)	51663	1587	ADAM3A	ADAM metallopeptidase domain 3A (pseudogene)
0.035067	chr8	123921390	123922394	27.8026	Intron (NM_001362797, Intron 3 of 4)	116120	79139	DERL1	derlin 1
0.0359058	chr8	94205270	94206435	9.09803	Intergenic	-26773	389676	C8orf87	chromosome 8 open reading frame 87
0.0362558	chr8	95540591	95541590	6.68712	Intron (NM_183009, Intron 7 of 12)	24607	25962	VIRMA	vir like m6A methyltransferase associated
0.0364096	chr8	119874086	119875101	8.76918	Intergenic	89531	4982	TNFRSF11B	TNF receptor superfamily member 11b
0.036605	chr8	103191271	103192271	7.06748	Intergenic	54111	100847001	MIR5680	microRNA 5680
0.0376506	chr8	102421923	102422922	17.0015	Intergenic	41301	83955	NACA4P	NACA family member 4, pseudogene
0.038113	chr8	81719725	81720745	8.12607	Intron (NM_001033723, Intron 2 of 8)	66468	619279	ZNF704	zinc finger protein 704
0.0384174	chr8	102595278	102596298	10.2136	Intron (NM_024915, Intron 7 of 15)	91121	79977	GRHL2	grainyhead like transcription factor 2
0.0385908	chr8	134863490	134864489	9.92723	Intergenic	-34750	101927822	LOC101927822	uncharacterized LOC101927822
0.0386894	chr8	18420309	18421313	8.8479	Intron (NM_001362819, Intron 13 of 14)	172019	10	NAT2	N-acetyltransferase 2
0.0392366	chr8	129100543	129101548	16.6693	Intron (NR_003367, Intron 6 of 8)	39647	100302175	MIR1207	microRNA 1207
0.0394074	chr8	93906336	93907348	5.64257	Intron (NM_001171797, Intron 3 of 4)	70975	286144	TRIQK	triple QxxK/R motif containing
0.0396573	chr8	101944740	101945739	9.02067	Intron (NM_001135700, Intron 2 of 5)	17560	7534	YWHAZ	tyrosine 3-monooxygenase/tryptophan 5-monooxygenase activation protein zeta
0.0399613	chr8	25517475	25518507	5.85661	Intergenic	201242	157313	CDCA2	cell division cycle associated 2
0.040193	chr8	18898663	18899662	5.12713	Intergenic	-27949	23362	PSD3	pleckstrin and Sec7 domain containing 3
0.0404318	chr8	134261659	134262663	34.2211	Intron (NM_006096, Intron 10 of 15)	47334	10397	NDRG1	N-myc downstream regulated 1
0.0428763	chr8	95278186	95279236	16.4392	Intergenic	-4164	2669	GEM	GTP binding protein overexpressed in skeletal muscle
0.0429219	chr8	99272438	99273449	10.5045	Intron (NR_135747, Intron 1 of 11)	33520	79815	NIPAL2	NIPA like domain containing 2
0.0432746	chr8	130443791	130444792	17.7667	Intron (NR_130919, Intron 1 of 3)	52097	100500839	MIR3686	microRNA 3686
0.043855	chr8	79442373	79443391	13.3103	Intron (NM_181839, Intron 1 of 2)	14307	5569	PKIA	cAMP-dependent protein kinase inhibitor alpha
0.0438681	chr8	27729748	27730851	17.2701	Intron (NM_173833, Intron 8 of 8)	13334	100422828	MIR4287	microRNA 4287
0.0440857	chr8	26165164	26166163	6.90425	Intron (NM_002717, Intron 2 of 9)	14931	5520	PPP2R2A	protein phosphatase 2 regulatory subunit Balpha
0.0463097	chr8	129355850	129356917	11.411	Intergenic	194021	100302281	MIR1208	microRNA 1208
0.0463264	chr8	125503084	125504098	31.3765	Intron (NM_032026, Intron 11 of 11)	16583	11236	RNF139	ring finger protein 139
0.0471762	chr8	40228406	40229445	10.7018	Intergenic	-28043	112543493	SIRLNT	SIRT1 regulating lncRNA tumor promoter
0.0485808	chr8	102619473	102620808	21.0613	Intron (NM_024915, Intron 8 of 15)	115473	79977	GRHL2	grainyhead like transcription factor 2
0.0499469	chr8	90894598	90895620	14.9823	Intergenic	-18987	734	OSGIN2	oxidative stress induced growth inhibitor family member 2
0.049987	chr8	94678103	94679167	9.08305	Intron (NR_033858, Intron 3 of 10)	34026	642924	LINC00535	long intergenic non-protein coding RNA 535
0.0501532	chr8	124673729	124674728	10.0225	Intergenic	-8187	340359	KLHL38	kelch like family member 38
0.050457	chr8	97431309	97432319	9.63547	Intergenic	-32148	102724804	LOC102724804	uncharacterized LOC102724804
0.0508616	chr8	117814878	117815911	16.5849	Intergenic	36631	84294	UTP23	UTP23 small subunit processome component
0.0518871	chr8	67866785	67867784	6.71326	Intron (NM_001193502, Intron 3 of 3)	7542	100129654	TCF24	transcription factor 24
0.0525398	chr8	71239802	71240811	7.00535	Intron (NM_001321703, Intron 1 of 22)	75319	10499	NCOA2	nuclear receptor coactivator 2
0.0535197	chr8	134254765	134255764	7.50479	Intron (NM_006096, Intron 14 of 15)	51982	8840	CCN4	cellular communication network factor 4
0.0538403	chr8	89122711	89123710	6.92194	Intron (NM_005941, Intron 6 of 9)	216502	4325	MMP16	matrix metallopeptidase 16
0.0546603	chr8	125150070	125151079	26.9047	Intron (NR_103547, Intron 1 of 4)	33189	157376	FER1L6-AS2	FER1L6 antisense RNA 2
0.0547463	chr8	125462090	125463911	15.4024	Promoter-TSS (NM_017956)	-61	55039	TRMT12	tRNA methyltransferase 12 homolog
0.0547868	chr8	56901158	56902157	10.9896	Intron (NM_002350, Intron 10 of 12)	84803	26795	SNORD54	small nucleolar RNA, C/D box 54
0.0548987	chr8	112943019	112944018	5.95849	Intergenic	554650	105375706	LINC02237	long intergenic non-protein coding RNA 2237
0.0556353	chr8	117010217	117011216	8.09207	Intron (NR_046215, Intron 7 of 13)	326581	100859921	LINC00536	long intergenic non-protein coding RNA 536
0.056386	chr8	124575887	124576922	11.3136	Intergenic	-22958	114907	FBXO32	F-box protein 32
0.0574107	chr8	95963290	95964289	18.0197	Intron (NR_148904, Intron 2 of 5)	2001	137682	NDUFAF6	NADH:ubiquinone oxidoreductase complex assembly factor 6
0.0582577	chr8	135768467	135769632	22.6129	Intergenic	-43775	57623	ZFAT	zinc finger and AT-hook domain containing
0.058475	chr8	128964070	128965079	26.5134	Intron (NR_003367, Intron 3 of 8)	-3605	641384	TMEM75	transmembrane protein 75
0.05881	chr8	64401892	64402891	6.6422	Intergenic	23984	102724612	LOC102724612	uncharacterized LOC102724612
0.0588427	chr8	101748316	101749319	11.7272	Intergenic	-14501	26986	PABPC1	poly(A) binding protein cytoplasmic 1
0.0604857	chr8	141106637	141107636	12.4499	Non-coding (NR_144431, Exon 1 of 1)	3498	359809	PEG13	paternally expressed 13
0.0605883	chr8	27559471	27560506	5.80092	Promoter-TSS (NR_037418)	-704	100500871	MIR3622B	microRNA 3622b
0.0610475	chr8	107620440	107621504	8.17168	Intron (NM_001198532, Intron 2 of 15)	-49064	55074	OXR1	oxidation resistance 1
0.0611277	chr8	129440162	129441176	18.6944	Intron (NR_121672, Intron 2 of 7)	136256	101927774	LINC00824	long intergenic non-protein coding RNA 824
0.0614499	chr8	81015063	81016081	10.0626	Intron (NM_005079, Intron 1 of 5)	-22506	7163	TPD52	tumor protein D52
0.0622759	chr8	103588843	103589861	10.9014	Intergenic	25535	4956	ODF1	outer dense fiber of sperm tails 1
0.0630019	chr8	7394025	7395024	4.34514	Intergenic	-2625	100131608	PRR23D1	proline rich 23 domain containing 1
0.0632171	chr8	62032950	62033984	8.89757	Intergenic	-153160	100130298	LOC100130298	hCG1816373-like
0.0634153	chr8	98435893	98436892	6.87087	Intron (NR_125390, Intron 1 of 2)	22333	101927066	LOC101927066	uncharacterized LOC101927066
0.0647557	chr8	643919	644985	10.0413	Intron (NR_156467, Intron 2 of 5)	36772	157697	ERICH1	glutamate rich 1
0.064893	chr8	91605167	91606166	8.23753	Intron (NR_104062, Intron 2 of 2)	12625	101937451	LINC01030	long intergenic non-protein coding RNA 1030
0.0652871	chr8	110293941	110295030	18.0832	Intron (NM_001128211, Intron 5 of 9)	47677	84955	NUDCD1	NudC domain containing 1
0.0653014	chr8	115515894	115517277	9.93669	Intergenic	-1067417	114788	CSMD3	CUB and Sushi multiple domains 3
0.0661737	chr8	123896894	123897900	12.2768	Intron (NM_001362797, Intron 3 of 4)	103503	22882	ZHX2	zinc fingers and homeoboxes 2
0.0675597	chr8	22406327	22407399	10.2171	Intergenic	-2577	10174	SORBS3	sorbin and SH3 domain containing 3
0.0676295	chr8	129069074	129070075	24.2768	Intron (NR_003367, Intron 5 of 8)	8176	100302175	MIR1207	microRNA 1207
0.0677315	chr8	110703459	110704525	9.11613	Promoter-TSS (NM_001099743)	28	55638	SYBU	syntabulin
0.0677976	chr8	109480651	109481650	6.14283	Intron (NM_014673, Intron 5 of 10)	25297	9694	EMC2	ER membrane protein complex subunit 2
0.0681923	chr8	126082007	126083006	18.208	Intron (NM_001330609, Intron 8 of 27)	21528	9897	WASHC5	WASH complex subunit 5
0.0686802	chr8	120473574	120474587	9.64124	Intergenic	45394	4856	CCN3	cellular communication network factor 3
0.0690234	chr8	126078612	126079699	17.4567	Intron (NM_001330609, Intron 9 of 27)	24879	9897	WASHC5	WASH complex subunit 5
0.0690458	chr8	76864251	76865250	5.56312	Intergenic	412547	3174	HNF4G	hepatocyte nuclear factor 4 gamma
0.0700821	chr8	124608514	124609526	8.83276	Intergenic	-55574	114907	FBXO32	F-box protein 32
0.0706616	chr8	145697378	145698442	25.6749	TTS (NM_003923)	3322	8928	FOXH1	forkhead box H1
0.0713348	chr8	123797709	123798748	41.2773	Intron (NM_014943, Intron 1 of 3)	4334	22882	ZHX2	zinc fingers and homeoboxes 2
0.0728634	chr8	80785202	80786201	6.92107	Intergenic	-1729	101927040	LOC101927040	uncharacterized LOC101927040
0.0743526	chr8	39911914	39912913	7.30577	Intergenic	-98588	56892	TCIM	transcriptional and immune response regulator
0.0743645	chr8	129209496	129210506	52.7102	Intergenic	47639	100302281	MIR1208	microRNA 1208
0.0747784	chr8	28056375	28057374	9.56921	Intergenic	106218	55140	ELP3	elongator acetyltransferase complex subunit 3
0.0750384	chr8	103884316	103885317	8.67862	Intron (NR_126339, Intron 1 of 2)	8317	100506753	AZIN1-AS1	AZIN1 antisense RNA 1
0.0751452	chr8	120220017	120221021	18.2152	Promoter-TSS (NM_052886)	-83	114569	MAL2	mal, T cell differentiation protein 2 (gene/pseudogene)
0.0760716	chr8	112112451	112113466	9.05917	Intron (NR_125418, Intron 3 of 3)	-73296	101927459	LINC01608	long intergenic non-protein coding RNA 1608
0.0764872	chr8	19744966	19745965	6.70341	Intergenic	-51299	4023	LPL	lipoprotein lipase
0.0765402	chr8	101758078	101759088	31.3469	Intergenic	-24267	26986	PABPC1	poly(A) binding protein cytoplasmic 1
0.0768723	chr8	96204937	96205937	15.3038	Intergenic	23165	619344	LINC01298	long intergenic non-protein coding RNA 1298
0.0774224	chr8	94416401	94417406	10.8333	Intron (NR_033858, Intron 7 of 10)	-237824	389676	C8orf87	chromosome 8 open reading frame 87
0.0783272	chr8	36968023	36969022	10.0176	Intergenic	-10949	100302233	MIR1268A	microRNA 1268a
0.0790243	chr8	101029842	101030861	11.8238	Intron (NM_001286692, Intron 14 of 27)	13541	109616982	SNORD77B	small nucleolar RNA, C/D box 77B
0.0794426	chr8	101357111	101358110	4.67015	Intergenic	-9178	25897	RNF19A	ring finger protein 19A, RBR E3 ubiquitin protein ligase
0.0800189	chr8	56902807	56903817	12.3839	Intron (NM_002350, Intron 10 of 12)	83148	26795	SNORD54	small nucleolar RNA, C/D box 54
0.0807934	chr8	126446557	126447567	28.6731	Intron (NM_025195, Intron 2 of 2)	2611	10221	TRIB1	tribbles pseudokinase 1
0.080856	chr8	8085055	8086334	48.1322	Promoter-TSS (NR_147089)	-398	286042	FAM86B3P	family with sequence similarity 86, member A pseudogene
0.0811023	chr8	127095621	127096629	7.55074	Intergenic	-132684	100130231	LINC00861	long intergenic non-protein coding RNA 861
0.08174	chr8	101900446	101901445	6.64992	Intergenic	61854	7534	YWHAZ	tyrosine 3-monooxygenase/tryptophan 5-monooxygenase activation protein zeta
0.0820358	chr8	116850318	116851351	11.8244	Intergenic	-169632	7227	TRPS1	transcriptional repressor GATA binding 1
0.08277	chr8	127582588	127583615	27.4195	Intergenic	-12378	157638	LRATD2	LRAT domain containing 2
0.0832344	chr8	129037165	129038207	21.561	Intron (NR_003367, Intron 5 of 8)	16542	100302170	MIR1206	microRNA 1206
0.0833998	chr8	17057877	17058876	4.02087	Intron (NM_001362989, Intron 6 of 12)	43703	51201	ZDHHC2	zinc finger DHHC-type containing 2
0.0839395	chr8	99097447	99098447	22.9101	Intron (NM_001170806, Intron 1 of 1)	21151	203111	ERICH5	glutamate rich 5
0.08453	chr8	48292318	48293317	4.94488	Intron (NR_104581, Intron 5 of 16)	119287	23514	SPIDR	scaffold protein involved in DNA repair
0.0849696	chr8	101759969	101760968	18.0929	Intergenic	-26152	26986	PABPC1	poly(A) binding protein cytoplasmic 1
0.0854453	chr8	141159359	141160407	13.0481	Intron (NM_001160372, Intron 17 of 22)	-49249	359809	PEG13	paternally expressed 13
0.0858204	chr8	87630598	87631608	19.9416	Intron (NM_019098, Intron 13 of 17)	104439	8895	CPNE3	copine 3
0.0861	chr8	27440816	27441852	7.22241	Intergenic	26934	102465508	MIR6843	microRNA 6843
0.0863413	chr8	102647627	102648628	21.4106	Intron (NM_024915, Intron 11 of 15)	143460	79977	GRHL2	grainyhead like transcription factor 2
0.0872146	chr8	120162384	120163554	10.028	Intergenic	-57633	114569	MAL2	mal, T cell differentiation protein 2 (gene/pseudogene)
0.0878942	chr8	119890482	119891487	18.7006	Intergenic	73140	4982	TNFRSF11B	TNF receptor superfamily member 11b
0.0890371	chr8	93065601	93066600	5.98053	Intron (NM_001198633, Intron 1 of 10)	8762	862	RUNX1T1	RUNX1 partner transcriptional co-repressor 1
0.0892417	chr8	115648524	115649548	31.5164	Intergenic	1031204	7227	TRPS1	transcriptional repressor GATA binding 1
0.0898364	chr8	125192267	125193293	12.1791	Intergenic	-9017	157376	FER1L6-AS2	FER1L6 antisense RNA 2
0.0907687	chr8	90912907	90915211	67.9143	Promoter-TSS (NM_004337)	-37	734	OSGIN2	oxidative stress induced growth inhibitor family member 2
0.0908142	chr8	90868628	90869637	8.80875	Intergenic	-44964	734	OSGIN2	oxidative stress induced growth inhibitor family member 2
0.0920419	chr8	134966359	134967366	6.57931	Intergenic	68123	101927822	LOC101927822	uncharacterized LOC101927822
0.094145	chr8	144198369	144199632	9.58043	Intergenic	36953	101928108	LY6L	lymphocyte antigen 6 family member L
0.0941682	chr8	128564443	128565442	7.27632	Intergenic	-70558	727677	CASC8	cancer susceptibility 8
0.0949282	chr8	119560338	119561828	19.6575	Intron (NM_001349811, Intron 2 of 4)	-72157	552860	SAMD12-AS1	SAMD12 antisense RNA 1
0.0957885	chr8	141108863	141109865	15.8083	Non-coding (NR_144431, Exon 1 of 1)	1270	359809	PEG13	paternally expressed 13
0.0963996	chr8	28605729	28606728	3.90474	Intron (NM_001440, Intron 6 of 6)	47210	2137	EXTL3	exostosin like glycosyltransferase 3
0.0971257	chr8	115626446	115627453	7.99494	Intergenic	1053291	7227	TRPS1	transcriptional repressor GATA binding 1
0.0973936	chr8	91094573	91095576	9.29414	Promoter-TSS (NM_004929)	33	793	CALB1	calbindin 1
0.0977473	chr8	94684553	94685608	13.2521	Intron (NR_033858, Intron 3 of 10)	27581	642924	LINC00535	long intergenic non-protein coding RNA 535
0.0991318	chr8	77087539	77088538	4.83995	Intergenic	-230851	101926978	LINC01111	long intergenic non-protein coding RNA 1111
0.0993783	chr8	81057874	81058873	6.7928	Intron (NR_105035, Intron 1 of 6)	24983	7163	TPD52	tumor protein D52
0.0998649	chr8	70073589	70074611	6.55205	Intergenic	-57675	100505718	LINC01592	long intergenic non-protein coding RNA 1592
0.099868	chr8	125356900	125357994	8.7369	Intron (NM_194291, Intron 1 of 6)	27493	157378	TMEM65	transmembrane protein 65
0.101929	chr8	25623316	25624330	9.63142	Intergenic	279106	64641	EBF2	EBF transcription factor 2
0.102182	chr8	134707182	134708243	7.81246	Intergenic	-11403	105375773	LOC105375773	uncharacterized LOC105375773
0.103092	chr8	114058247	114059279	7.97327	Intron (NM_001363185, Intron 5 of 66)	330618	114788	CSMD3	CUB and Sushi multiple domains 3
0.104696	chr8	130563229	130564244	6.61354	Intron (NR_130917, Intron 1 of 3)	23528	137196	CCDC26	CCDC26 long Non-coding RNA
0.105476	chr8	98843405	98844404	6.53859	Intron (NM_018407, Intron 6 of 6)	-37388	4147	MATN2	matrilin 2
0.105959	chr8	125793318	125794325	18.4494	Intergenic	-40406	100616221	MIR4662A	microRNA 4662a
0.106474	chr8	11302516	11303515	3.27057	Intron (NM_053279, Intron 1 of 2)	21247	83648	FAM167A	family with sequence similarity 167 member A
0.106566	chr8	10614020	10615029	6.21187	Intron (NR_146188, Intron 1 of 2)	-26503	83595	SOX7	SRY-box transcription factor 7
0.107351	chr8	80711408	80712409	9.30825	Intron (NR_125410, Intron 3 of 3)	31531	101927067	LINC01607	long intergenic non-protein coding RNA 1607
0.109825	chr8	102615449	102616483	28.3726	Intron (NM_024915, Intron 8 of 15)	111299	79977	GRHL2	grainyhead like transcription factor 2
0.11144	chr8	22258275	22259274	7.2987	Intron (NM_001351660, Intron 1 of 8)	8425	23516	SLC39A14	solute carrier family 39 member 14
0.112198	chr8	130401795	130402902	6.8027	Intron (NR_130918, Intron 1 of 2)	94040	100500839	MIR3686	microRNA 3686
0.112243	chr8	141469223	141470447	21.8522	Intergenic	-1157	83696	TRAPPC9	trafficking protein particle complex 9
0.113818	chr8	131044683	131045702	16.7083	Intergenic	-15817	51571	FAM49B	family with sequence similarity 49 member B
0.114227	chr8	99389609	99390608	5.28305	Intergenic	15858	113218497	MIR9903	microRNA 9903
0.114641	chr8	92624461	92625460	7.49047	Intergenic	363413	115111	SLC26A7	solute carrier family 26 member 7
0.114878	chr8	115933713	115934719	9.32313	Intergenic	746024	7227	TRPS1	transcriptional repressor GATA binding 1
0.116877	chr8	134632300	134633308	11.6142	Intergenic	-48674	6482	ST3GAL1	ST3 beta-galactoside alpha-2,3-sialyltransferase 1
0.117519	chr8	28114597	28115596	6.43018	Intergenic	-59689	5368	PNOC	prepronociceptin
0.118596	chr8	103659508	103660526	25.6655	TTS (NM_001032282)	6175	7071	KLF10	Kruppel like factor 10
0.119458	chr8	101429112	101430185	23.38	Intergenic	34657	100616451	MIR4471	microRNA 4471
0.119795	chr8	145805767	145806811	14.423	Exon (NM_001308208, Exon 3 of 11)	24791	80728	ARHGAP39	Rho GTPase activating protein 39
0.120209	chr8	142064856	142065872	8.37591	Intergenic	-53186	5747	PTK2	protein tyrosine kinase 2
0.120981	chr8	71970996	71972056	12.0205	Intergenic	297415	2138	EYA1	EYA transcriptional coactivator and phosphatase 1
0.121714	chr8	81168845	81169850	30.0361	Intergenic	15723	100847056	MIR5708	microRNA 5708
0.122644	chr8	104022420	104023419	6.66385	Intergenic	-10392	528	ATP6V1C1	ATPase H+ transporting V1 subunit C1
0.123724	chr8	37159287	37160316	6.73966	Intron (NR_031672, Intron 2 of 2).2	180330	100302233	MIR1268A	microRNA 1268a
0.124303	chr8	144948090	144949210	66.3639	Intron (NM_031308, Intron 1 of 2)	3982	83481	EPPK1	epiplakin 1
0.124943	chr8	98606954	98608708	16.8576	Intergenic	-48581	92140	MTDH	metadherin
0.126298	chr8	101893873	101894873	7.57525	Intergenic	68426	7534	YWHAZ	tyrosine 3-monooxygenase/tryptophan 5-monooxygenase activation protein zeta
0.127049	chr8	29132844	29133843	8.53972	Intergenic	-12756	23303	KIF13B	kinesin family member 13B
0.128667	chr8	87526136	87527169	65.364	Promoter-TSS (NM_001317807)	-12	8895	CPNE3	copine 3
0.129494	chr8	103644347	103645346	6.023	Intergenic	21346	7071	KLF10	Kruppel like factor 10
0.13185	chr8	128882323	128883328	44.4108	Intron (NR_003367, Intron 1 of 8)	74617	100302185	MIR1204	microRNA 1204
0.131863	chr8	74985051	74986087	13.6458	Intergenic	81942	23643	LY96	lymphocyte antigen 96
0.131983	chr8	6506110	6507201	15.0287	TTS (NM_024596)	-26914	102465861	MIR8055	microRNA 8055
0.132303	chr8	104123379	104124378	5.0723	Intergenic	-9382	379034	LINC01181	long intergenic non-protein coding RNA 1181
0.132585	chr8	95168309	95169308	8.28983	Intron (NM_001144663, Intron 12 of 17)	51975	1015	CDH17	cadherin 17
0.134842	chr8	95020958	95022054	13.2473	Intergenic	92331	54704	PDP1	pyruvate dehyrogenase phosphatase catalytic subunit 1
0.135753	chr8	51695364	51696363	4.00602	Intron (NR_135797, Intron 20 of 20)	619172	54212	SNTG1	syntrophin gamma 1
0.137056	chr8	111833996	111835012	9.98517	Intergenic	205158	101927459	LINC01608	long intergenic non-protein coding RNA 1608
0.137727	chr8	145077283	145078283	13.4929	Intergenic	-8665	375686	SPATC1	spermatogenesis and centriole associated 1
0.138132	chr8	102400100	102401858	9.49782	Intergenic	19858	83955	NACA4P	NACA family member 4, pseudogene
0.13835	chr8	89566448	89567464	10.3153	Intergenic	-227244	4325	MMP16	matrix metallopeptidase 16
0.140072	chr8	87045093	87046102	9.67696	Intergenic	36300	85481	PSKH2	protein serine kinase H2
0.140594	chr8	71368252	71369251	4.81472	Intergenic	-14618	101926892	LOC101926892	uncharacterized LOC101926892
0.141833	chr8	117714978	117716032	12.3086	Intron (NM_003756, Intron 2 of 7)	51166	105375713	LOC105375713	uncharacterized LOC105375713
0.144218	chr8	116392615	116393614	6.07152	Intergenic	287126	7227	TRPS1	transcriptional repressor GATA binding 1
0.144322	chr8	145577730	145578729	15.8914	TTS (NM_024555)	362	340393	TMEM249	transmembrane protein 249
0.145899	chr8	126605952	126606951	12.9854	Intergenic	162000	10221	TRIB1	tribbles pseudokinase 1
0.146369	chr8	143023119	143024138	20.6208	Intergenic	56029	100616374	MIR4539	microRNA 4539
0.148319	chr8	133058629	133059790	7.69299	Intron (NM_001080399, Intron 2 of 13)	12420	729330	OC90	otoconin 90
0.14857	chr8	144069216	144070215	7.77486	Intron (NR_026913, Intron 1 of 1)	-7530	100128627	CDC42P3	cell division cycle 42 pseudogene 3
0.149565	chr8	63920154	63921153	6.47897	Intergenic	30233	643763	NKAIN3-IT1	NKAIN3 Intronic transcript
0.149631	chr8	131106938	131108008	63.473	Intron (NM_018482, Intron 24 of 29)	-10459	100507117	ASAP1-IT2	ASAP1 Intronic transcript 2
0.150365	chr8	145164035	145165175	15.9478	Exon (NM_001316309, Exon 5 of 24)	1963	340390	WDR97	WD repeat domain 97
0.15088	chr8	99317938	99318954	11.8723	Intergenic	-11983	79815	NIPAL2	NIPA like domain containing 2
0.152151	chr8	101692763	101694188	15.8955	Intergenic	21777	102466854	MIR7705	microRNA 7705
0.156295	chr8	30264032	30265031	3.70376	Intron (NM_001008710, Intron 1 of 8)	-21614	100128750	RBPMS-AS1	RBPMS antisense RNA 1
0.157653	chr8	125049682	125050681	9.46371	Intron (NM_001039112, Intron 19 of 40)	2842	439941	FER1L6-AS1	FER1L6 antisense RNA 1
0.158319	chr8	99829340	99830339	13.0718	Intron (NM_001256312, Intron 3 of 12)	8060	6788	STK3	serine/threonine kinase 3
0.158869	chr8	81152524	81153524	19.0419	Promoter-TSS (NR_049894)	-600	100847056	MIR5708	microRNA 5708
0.159368	chr8	104222187	104223186	14.1824	Intron (NM_001364874, Intron 2 of 3)	-38318	100499183	BAALC-AS1	BAALC antisense RNA 1
0.161617	chr8	144978469	144979497	27.6683	Intergenic	-26351	83481	EPPK1	epiplakin 1
0.16215	chr8	135732390	135733443	10.1101	Intergenic	-7642	57623	ZFAT	zinc finger and AT-hook domain containing
0.166359	chr8	90813186	90814550	21.3648	Intergenic	43824	8767	RIPK2	receptor interacting serine/threonine kinase 2
0.167154	chr8	127395626	127397190	10.5136	Intergenic	58668	101927657	LOC101927657	uncharacterized LOC101927657
0.168462	chr8	135746706	135747705	6.47694	Intergenic	-21931	57623	ZFAT	zinc finger and AT-hook domain containing
0.169566	chr8	142974712	142975738	8.49271	Intergenic	104432	100616374	MIR4539	microRNA 4539
0.169679	chr8	86202038	86203037	4.95706	Intergenic	44850	377677	CA13	carbonic anhydrase 13
0.170036	chr8	96112276	96113617	21.5227	Intron (NR_148914, Intron 9 of 11)	-27536	105375650	MIR3150BHG	MIR3150B host gene
0.170194	chr8	143120286	143121292	9.38195	Intergenic	-41132	100616374	MIR4539	microRNA 4539
0.171045	chr8	144939944	144941176	26.7545	Exon (NM_031308, Exon 2 of 3)	12072	83481	EPPK1	epiplakin 1
0.171048	chr8	128585286	128586315	8.9035	Intergenic	-91416	727677	CASC8	cancer susceptibility 8
0.173087	chr8	119500548	119501598	7.85094	Intron (NM_001349811, Intron 2 of 4)	-132167	552860	SAMD12-AS1	SAMD12 antisense RNA 1
0.17526	chr8	11428952	11429951	5.08588	Intergenic	-4593	83655	LINC00208	long intergenic non-protein coding RNA 208
0.17572	chr8	103628801	103629922	17.4496	Intergenic	36831	7071	KLF10	Kruppel like factor 10
0.175836	chr8	87354105	87355192	58.4992	Promoter-TSS (NM_007013)	-128	11059	WWP1	WW domain containing E3 ubiquitin protein ligase 1
0.176341	chr8	37761195	37762268	18.734	Intergenic	-4716	80223	RAB11FIP1	RAB11 family interacting protein 1
0.177641	chr8	8244251	8245251	13.8426	Promoter-TSS (NM_001080826)	-802	157285	PRAG1	PEAK1 related, kinase-activating pseudokinase 1
0.179478	chr8	127576220	127577219	10.5244	Intergenic	-5996	157638	LRATD2	LRAT domain containing 2
0.181874	chr8	123817826	123818825	10.6542	Intron (NM_014943, Intron 1 of 3)	24431	22882	ZHX2	zinc fingers and homeoboxes 2
0.183598	chr8	54647067	54648095	26.3522	Intron (NM_213620, Intron 13 of 13)	108021	51606	ATP6V1H	ATPase H+ transporting V1 subunit H
0.183845	chr8	144360471	144361470	13.0384	Intergenic	2900	100507316	MINCR	MYC-induced long Non-coding RNA
0.185703	chr8	126602008	126603007	10.7305	Intergenic	158056	10221	TRIB1	tribbles pseudokinase 1
0.188261	chr8	7744125	7745124	5.5107	Intergenic	5898	414325	DEFB103A	defensin beta 103A
0.189662	chr8	94172057	94173226	8.084	Intron (NR_161372, Intron 1 of 2)	6438	389676	C8orf87	chromosome 8 open reading frame 87
0.190108	chr8	41399876	41401356	11.9675	3' UTR (NM_032336, Exon 8 of 8)	13836	84296	GINS4	GINS complex subunit 4
0.194934	chr8	124540126	124541130	18.3257	Intron (NM_148177, Intron 1 of 5)	3755	114907	FBXO32	F-box protein 32
0.19515	chr8	97951579	97952619	7.71304	Intron (NM_016134, Intron 4 of 7)	294629	10404	CPQ	carboxypeptidase Q
0.195217	chr8	90769477	90770494	81.6237	Promoter-TSS (NM_003821)	-46	101929709	LOC101929709	uncharacterized LOC101929709
0.196035	chr8	96125055	96126057	32.5383	Intron (NR_148914, Intron 10 of 11)	-20457	79666	PLEKHF2	pleckstrin homology and FYVE domain containing 2
0.196811	chr8	135255076	135256298	8.13682	Intergenic	-354627	594840	ZFAT-AS1	ZFAT antisense RNA 1
0.197359	chr8	37781573	37782572	9.4174	Intergenic	15570	137362	GOT1L1	glutamic-oxaloacetic transaminase 1 like 1
0.200116	chr8	90995907	90997046	112.397	Intron (NM_001024688, Intron 1 of 16)	423	4683	NBN	nibrin
0.200439	chr8	98279342	98280341	4.54432	Intron (NR_125390, Intron 2 of 2)	10315	85453	TSPYL5	TSPY like 5
0.201078	chr8	102092442	102093485	29.246	Intergenic	28681	441374	FLJ42969	uncharacterized LOC441374
0.202208	chr8	134500275	134501274	9.56987	Intron (NM_173344, Intron 3 of 9)	83356	6482	ST3GAL1	ST3 beta-galactoside alpha-2,3-sialyltransferase 1
0.204118	chr8	129044769	129045838	20.5421	Intron (NR_003367, Intron 5 of 8)	-16095	100302175	MIR1207	microRNA 1207
0.205579	chr8	139114704	139115703	5.78363	Intergenic	-19415	401478	LOC401478	uncharacterized LOC401478
0.206597	chr8	11218855	11219905	8.32723	Intron (NR_001578, Intron 6 of 8)	-6531	83656	FAM167A-AS1	FAM167A antisense RNA 1
0.207318	chr8	29412528	29413661	12.5571	Intergenic	192531	619351	LINC00589	long intergenic non-protein coding RNA 589
0.208534	chr8	38143857	38144856	4.42472	Intron (NM_023034, Intron 19 of 23)	-17606	84513	PLPP5	phospholipid phosphatase 5
0.209762	chr8	95579518	95580517	7.17921	Intergenic	-14271	25962	VIRMA	vir like m6A methyltransferase associated
0.210162	chr8	101116445	101117444	9.58373	Intron (NM_001286692, Intron 2 of 27)	910	26166	RGS22	regulator of G protein signaling 22
0.214608	chr8	102015508	102016507	11.1297	Intergenic	-48275	441374	FLJ42969	uncharacterized LOC441374
0.216833	chr8	95101277	95102276	6.43939	Intergenic	119007	1015	CDH17	cadherin 17
0.222399	chr8	131530404	131531403	10.1136	Intergenic	-74983	50807	ASAP1	ArfGAP with SH3 domain, ankyrin repeat and PH domain 1
0.222825	chr8	126137490	126138489	11.8718	Intron (NR_146191, Intron 3 of 8)	33887	286053	NSMCE2	NSE2 (MMS21) homolog, SMC5-SMC6 complex SUMO ligase
0.223098	chr8	91513235	91514234	3.9914	Intergenic	104557	101937451	LINC01030	long intergenic non-protein coding RNA 1030
0.226597	chr8	74152382	74153381	4.61757	TTS (NM_001243237)	18856	100130301	C8orf89	chromosome 8 open reading frame 89
0.228292	chr8	17658523	17659584	25.154	Promoter-TSS (NM_001363062)	35	57509	MTUS1	microtubule associated scaffold protein 1
0.234108	chr8	82002462	82003493	6.90707	Intron (NM_018440, Intron 1 of 8)	21326	55824	PAG1	phosphoprotein membrane anchor with glycosphingolipid microdomains 1
0.235212	chr8	122200951	122201950	6.94031	Intergenic	-377164	6641	SNTB1	syntrophin beta 1
0.243112	chr8	29171973	29172972	12.0348	Intergenic	33850	1846	DUSP4	dual specificity phosphatase 4
0.244178	chr8	7770621	7771639	5.67048	Intergenic	-12729	100132396	ZNF705B	zinc finger protein 705B
0.248737	chr8	122166304	122167304	18.1862	Intergenic	-342518	6641	SNTB1	syntrophin beta 1
0.00026286	chr7	91686307	91687354	26.3935	Intron (NM_147185, Intron 22 of 49)	76961	1595	CYP51A1	cytochrome P450 family 51 subfamily A member 1
0.000387988	chr7	105711501	105712525	26.1215	Intergenic	40745	6856	SYPL1	synaptophysin like 1
0.000842399	chr7	100609105	100610109	61.6324	Exon (NM_005960, Exon 11 of 15)	-3297	10071	MUC12	mucin 12, cell surface associated
0.00112577	chr7	128074728	128075727	15.2996	Intergenic	-20657	29923	HILPDA	hypoxia inducible lipid droplet associated
0.00220834	chr7	92563101	92564100	61.439	Intergenic	-97659	1021	CDK6	cyclin dependent kinase 6
0.00258366	chr7	94463316	94464387	65.4859	Intergenic	-73055	55607	PPP1R9A	protein phosphatase 1 regulatory subunit 9A
0.00273481	chr7	90557677	90558705	18.5005	Intron (NM_001287136, Intron 7 of 13)	219061	5218	CDK14	cyclin dependent kinase 14
0.00338159	chr7	128084014	128085073	36.0184	Intergenic	-11341	29923	HILPDA	hypoxia inducible lipid droplet associated
0.00338774	chr7	91023826	91024830	15.3645	Intergenic	130580	8321	FZD1	frizzled class receptor 1
0.00362014	chr7	100995399	100996398	8.38301	Intergenic	-10203	136227	COL26A1	collagen type XXVI alpha 1 chain
0.003695	chr7	112556489	112557521	27.306	Intron (NM_152556, Intron 1 of 4)	22925	154743	BMT2	base methyltransferase of 25S rRNA 2 homolog
0.00441835	chr7	111513034	111514033	7.90807	Intron (NM_001363540, Intron 17 of 52)	64972	100506413	DOCK4-AS1	DOCK4 antisense RNA 1
0.00454031	chr7	70716364	70717374	9.08996	Intron (NM_022479, Intron 1 of 10)	-55791	100500920	MIR3914-2	microRNA 3914-2
0.00491535	chr7	91705516	91706536	15.075	Intron (NM_147185, Intron 28 of 49)	57765	1595	CYP51A1	cytochrome P450 family 51 subfamily A member 1
0.00504687	chr7	63386302	63387305	37.1933	Intergenic	-72381	100419780	ZNF722P	zinc finger protein 722, pseudogene
0.00512636	chr7	97852259	97853264	16.6383	Intron (NM_015395, Intron 20 of 25)	11195	168620	BHLHA15	basic helix-loop-helix family member a15
0.00521213	chr7	102885013	102886022	17.9193	Intron (NR_027768, Intron 6 of 22)	35242	349152	DPY19L2P2	DPY19L2 pseudogene 2
0.00524763	chr7	27299539	27300538	4.17734	Intergenic	-13190	101410536	EVX1-AS	EVX1 antisense RNA
0.00593558	chr7	151594253	151595252	7.06845	Intergenic	-20552	51422	PRKAG2	protein kinase AMP-activated non-catalytic subunit gamma 2
0.00631178	chr7	86668693	86669695	68.3692	Intron (NM_001142749, Intron 1 of 21)	356	222223	KIAA1324L	KIAA1324 like
0.00663891	chr7	97905174	97906198	21.5942	Intergenic	-5312	25798	BRI3	brain protein I3
0.00673642	chr7	98099628	98100631	17.4664	Intergenic	-69727	55971	BAIAP2L1	BAI1 associated protein 2 like 1
0.00676812	chr7	111085724	111086779	7.31372	Intron (NM_001350961, Intron 4 of 7)	116096	83943	IMMP2L	inner mitochondrial membrane peptidase subunit 2
0.00678222	chr7	112383576	112384585	15.6436	Intergenic	46368	64418	TMEM168	transmembrane protein 168
0.00681804	chr7	105297078	105298077	7.90535	Intron (NM_001318229, Intron 3 of 9)	22025	222255	ATXN7L1	ataxin 7 like 1
0.00694126	chr7	34214197	34215206	35.3242	Intergenic	269550	168667	BMPER	BMP binding endothelial regulator
0.00708345	chr7	110046998	110047997	7.38179	Intergenic	-447227	442720	EIF3IP1	eukaryotic translation initiation factor 3 subunit I pseudogene 1
0.00719935	chr7	92213936	92214935	14.5874	Intron (NM_152789, Intron 1 of 10)	4928	257415	FAM133B	family with sequence similarity 133 member B
0.00722713	chr7	63360123	63361644	27.6495	Intergenic	-98301	100419780	ZNF722P	zinc finger protein 722, pseudogene
0.00723791	chr7	124821496	124822495	7.22537	Intergenic	-2628	101928283	LOC101928283	uncharacterized LOC101928283
0.0073304	chr7	110317084	110318095	12.7428	Intron (NM_001350963, Intron 5 of 5)	-413473	54674	LRRN3	leucine rich repeat neuronal 3
0.00767052	chr7	107841812	107842831	12.0367	Intron (NM_001371168, Intron 14 of 31)	41508	#N/A
0.0076808	chr7	91807832	91808867	17.5987	Non-coding (NR_122109, Exon 5 of 5)	-13759	401387	LRRD1	leucine rich repeats and death domain containing 1
0.00796481	chr7	116420758	116421762	33.247	Intron (NM_001324402, Intron 16 of 19)	-81381	830	CAPZA2	capping actin protein of muscle Z-line subunit alpha 2
0.00797669	chr7	92093419	92094597	10.0581	Intergenic	6730	30816	ERVW-1	endogenous retrovirus group W member 1, envelope
0.00818861	chr7	105580248	105581247	10.228	Intergenic	-22963	222256	CDHR3	cadherin related family member 3
0.00828609	chr7	39932818	39933817	10.1504	Intergenic	55701	112267983	LOC112267983	uncharacterized LOC112267983
0.0088511	chr7	114785864	114786863	5.76406	Intron (NR_126407, Intron 2 of 4)	67351	102724386	LINC01393	long intergenic non-protein coding RNA 1393
0.0090823	chr7	138248760	138249771	10.3174	Intron (NM_015905, Intron 9 of 18)	99704	136306	SVOPL	SVOP like
0.00917125	chr7	95960211	95961210	9.75242	Intergenic	-9251	10165	SLC25A13	solute carrier family 25 member 13
0.00924179	chr7	107146174	107147681	46.2655	Intron (NM_006348, Intron 6 of 21)	36425	2845	GPR22	G protein-coupled receptor 22
0.00925099	chr7	113382887	113383922	28.219	Intergenic	175660	5506	PPP1R3A	protein phosphatase 1 regulatory subunit 3A
0.00926373	chr7	130261774	130262797	9.98433	Intron (NM_012133, Intron 9 of 12)	91303	26958	COPG2	coatomer protein complex subunit gamma 2
0.00945114	chr7	3255250	3256258	9.89289	Intergenic	-57548	100129603	LOC100129603	uncharacterized LOC100129603
0.00980249	chr7	110174320	110175325	44.7971	Intergenic	-556240	54674	LRRN3	leucine rich repeat neuronal 3
0.00985965	chr7	104209781	104210870	9.79784	Intron (NM_199000, Intron 1 of 2)	234214	645591	LHFPL3-AS1	LHFPL3 antisense RNA 1
0.0099024	chr7	25642263	25643678	7.47906	Intron (NR_157829, Intron 3 of 4)	59790	646588	LOC646588	uncharacterized LOC646588
0.0100743	chr7	92582595	92583609	9.73337	Intergenic	-117161	1021	CDK6	cyclin dependent kinase 6
0.0103182	chr7	57471921	57472927	21.2704	Promoter-TSS (NR_036102)	-307	100422939	MIR3147	microRNA 3147
0.0104096	chr7	39759837	39760840	6.04835	Intergenic	-12829	349114	LINC00265	long intergenic non-protein coding RNA 265
0.0104521	chr7	108251363	108252368	29.9985	Intergenic	41547	4189	DNAJB9	DnaJ heat shock protein family (Hsp40) member B9
0.0104893	chr7	123464426	123465426	10.0348	Intergenic	10733	26062	HYAL6P	hyaluronidase 6, pseudogene
0.0105868	chr7	97580584	97581583	19.0197	Intron (NR_147989, Intron 1 of 18)	-11887	100847066	MIR5692A1	microRNA 5692a-1
0.010719	chr7	92054585	92055584	14.9234	Intron (NR_145992, Intron 5 of 9)	11544	105375396	TMBIM7P	transmembrane BAX inhibitor motif containing 7, pseudogene
0.0111011	chr7	101233207	101234215	9.83587	Intergenic	-21425	100506527	LINC01007	long intergenic non-protein coding RNA 1007
0.0111035	chr7	108253835	108254842	31.1548	Intergenic	44020	4189	DNAJB9	DnaJ heat shock protein family (Hsp40) member B9
0.0114603	chr7	123167346	123168404	8.65418	Intron (NR_104245, Intron 1 of 11)	5127	154865	IQUB	IQ motif and ubiquitin domain containing
0.0115169	chr7	111389891	111390904	8.9944	Intron (NM_001363540, Intron 42 of 52)	-58164	100506413	DOCK4-AS1	DOCK4 antisense RNA 1
0.011546	chr7	105879490	105880499	18.5346	Intergenic	45435	10135	NAMPT	nicotinamide phosphoribosyltransferase
0.0115499	chr7	80702558	80703590	9.85691	Intergenic	-151369	10512	SEMA3C	semaphorin 3C
0.0116271	chr7	107980880	107981890	25.0553	Intron (NM_001371131, Intron 2 of 33)	-12415	#N/A
0.0117248	chr7	116363536	116364951	15.846	Intron (NM_001324401, Intron 2 of 11)	51993	4233	MET	MET proto-oncogene, receptor tyrosine kinase
0.0119467	chr7	93220032	93221052	30.2412	Intergenic	-16500	799	CALCR	calcitonin receptor
0.0119711	chr7	122318935	122319947	16.5002	Intron (NM_001009571, Intron 2 of 27)	19730	168433	RNF133	ring finger protein 133
0.0121501	chr7	114670537	114671536	8.65036	Intergenic	-47976	102724386	LINC01393	long intergenic non-protein coding RNA 1393
0.0124986	chr7	107060478	107061477	8.41211	Intron (NM_006348, Intron 6 of 21)	-49525	2845	GPR22	G protein-coupled receptor 22
0.0127495	chr7	112211918	112214342	15.6595	Intergenic	-44990	100996249	LOC100996249	uncharacterized LOC100996249
0.0129826	chr7	132515187	132516393	16.1246	Intron (NR_133671, Intron 7 of 10)	72060	100506937	LOC100506937	uncharacterized LOC100506937
0.013138	chr7	138461067	138462067	38.0465	Intron (NM_130840, Intron 1 of 20)	-2785	50617	ATP6V0A4	ATPase H+ transporting V0 subunit a4
0.0132275	chr7	101251745	101252766	30.2591	Intergenic	20321	93408	MYL10	myosin light chain 10
0.0132991	chr7	117477603	117478602	3.95599	Intron (NM_001363351, Intron 2 of 22)	34172	83992	CTTNBP2	cortactin binding protein 2
0.0133701	chr7	102282820	102283949	29.4037	Promoter-TSS (NM_001114403)	-146	100134938	UPK3BL1	uroplakin 3B like 1
0.0136181	chr7	100825377	100826430	60.8104	Intergenic	-2329	375607	NAT16	N-acetyltransferase 16 (putative)
0.0136511	chr7	115480436	115481435	6.96818	Intergenic	127432	22797	TFEC	transcription factor EC
0.0137655	chr7	92102947	92103954	31.165	Intron (NM_001130925, Intron 1 of 1)	-2712	30816	ERVW-1	endogenous retrovirus group W member 1, envelope
0.0141503	chr7	39931619	39932678	18.3155	Intergenic	56870	112267983	LOC112267983	uncharacterized LOC112267983
0.0142239	chr7	107134559	107135568	14.6923	Intron (NM_006348, Intron 6 of 21)	24561	2845	GPR22	G protein-coupled receptor 22
0.014256	chr7	107731584	107732600	9.44373	Exon (NM_001318048, Exon 14 of 18)	38714	22798	LAMB4	laminin subunit beta 4
0.0144487	chr7	149066314	149067325	6.48386	Intergenic	84447	155060	LOC155060	AI894139 pseudogene
0.0147751	chr7	109922788	109923832	10.2373	Intergenic	-323040	442720	EIF3IP1	eukaryotic translation initiation factor 3 subunit I pseudogene 1
0.0148218	chr7	6034818	6035903	16.5061	Intron (NM_000535, Intron 7 of 14)	13320	5395	PMS2	PMS1 homolog 2, mismatch repair system component
0.0150531	chr7	105698498	105699577	18.7316	Intergenic	53721	6856	SYPL1	synaptophysin like 1
0.0151348	chr7	100223819	100224847	16.2727	Intron (NM_003227, Intron 17 of 17)	6940	7036	TFR2	transferrin receptor 2
0.0151472	chr7	99379798	99380797	6.98801	Intron (NM_001202855, Intron 1 of 12)	1510	1576	CYP3A4	cytochrome P450 family 3 subfamily A member 4
0.0156628	chr7	105280758	105281757	8.28242	Intron (NM_001318229, Intron 5 of 9)	38345	222255	ATXN7L1	ataxin 7 like 1
0.0158873	chr7	103046888	103047889	58.4853	Intron (NM_206883, Intron 8 of 19)	36270	375611	SLC26A5	solute carrier family 26 member 5
0.0160277	chr7	7393991	7395063	10.7613	Intergenic	99742	101927354	LOC101927354	uncharacterized LOC101927354
0.0161951	chr7	56355238	56356242	11.7939	Intergenic	160328	650226	LOC650226	ankyrin repeat domain 26 pseudogene
0.0162547	chr7	40938467	40939537	15.7808	Intergenic	80535	101928744	LINC01450	long intergenic non-protein coding RNA 1450
0.0164096	chr7	107991829	107992828	9.01799	Intron (NM_001371131, Intron 2 of 33)	-23358	#N/A
0.0164965	chr7	661229	662228	6.3986	Intron (NM_001164762, Intron 4 of 10)	18693	101926963	LOC101926963	uncharacterized LOC101926963
0.0170327	chr7	102183722	102184860	31.0739	5' UTR (NM_001363506, Exon 2 of 7)	944	107983993	UPK3BL2	uroplakin 3B like 2
0.0171321	chr7	104954027	104955033	13.3147	Intron (NM_001350738, Intron 2 of 16)	-15304	6733	SRPK2	SRSF protein kinase 2
0.0171477	chr7	156925154	156926178	10.1103	Intergenic	-5954	9690	UBE3C	ubiquitin protein ligase E3C
0.017199	chr7	158750290	158751318	64.5418	Intergenic	-50241	154822	LINC00689	long intergenic non-protein coding RNA 689
0.0174425	chr7	4871435	4872446	30.7675	Intron (NM_018059, Intron 4 of 14)	5141	109623455	SNORD165	small nucleolar RNA, C/D box 165
0.01789	chr7	22712582	22713641	27.3276	Intergenic	-7959	401312	LOC401312	uncharacterized LOC401312
0.0179204	chr7	137988221	137989337	5.30237	Intergenic	-156225	8805	TRIM24	tripartite motif containing 24
0.0184502	chr7	29602157	29603855	15.1116	Promoter-TSS (NM_001329996)	-445	222171	PRR15	proline rich 15
0.0187264	chr7	127117103	127118102	5.67233	Intron (NR_110024, Intron 1 of 3)	665	100506682	LOC100506682	uncharacterized LOC100506682
0.0190323	chr7	81107727	81108726	20.9838	Intergenic	82909	105369146	LOC105369146	uncharacterized LOC105369146
0.019247	chr7	156811377	156812676	10.603	Intergenic	8475	645249	MNX1-AS1	MNX1 antisense RNA 1 (head to head)
0.0195992	chr7	23250826	23252020	12.2484	Intergenic	29756	11097	NUP42	nucleoporin 42
0.019853	chr7	131935776	131937431	34.2894	Intron (NM_020911, Intron 4 of 31)	-9017	101928807	LOC101928807	uncharacterized LOC101928807
0.0198662	chr7	109339332	109340469	8.46675	Intergenic	260370	442720	EIF3IP1	eukaryotic translation initiation factor 3 subunit I pseudogene 1
0.0199031	chr7	109239448	109240447	8.0147	Intergenic	360323	442720	EIF3IP1	eukaryotic translation initiation factor 3 subunit I pseudogene 1
0.020095	chr7	155324167	155325207	14.0722	Intron (NM_001369813, Intron 2 of 4)	1870	285888	CNPY1	canopy FGF signaling regulator 1
0.0203951	chr7	17245572	17246635	17.6016	Intergenic	-92173	196	AHR	aryl hydrocarbon receptor
0.020581	chr7	73330506	73331538	9.92171	Intergenic	55533	135886	TMEM270	transmembrane protein 270
0.0206118	chr7	68195659	68196658	7.22821	Intergenic	710918	102723427	LOC102723427	uncharacterized LOC102723427
0.0210397	chr7	8342741	8344167	14.8742	Intron (NR_125740, Intron 3 of 5)	-41212	3382	ICA1	islet cell autoantigen 1
0.0211509	chr7	5128204	5129323	17.114	Intergenic	17072	389458	RBAKDN	RBAK downstream neighbor
0.0212204	chr7	86475779	86476785	20.7338	Intron (NM_000840, Intron 4 of 5)	118933	222223	KIAA1324L	KIAA1324 like
0.021236	chr7	106238850	106239913	8.91738	Intergenic	62223	168455	CCDC71L	coiled-coil domain containing 71 like
0.0214177	chr7	105819937	105820941	14.3573	Intergenic	-67417	6856	SYPL1	synaptophysin like 1
0.0216417	chr7	157916040	157917043	10.888	Intron (NM_001308268, Intron 9 of 22)	269264	100506585	LOC100506585	uncharacterized LOC100506585
0.0217191	chr7	69763823	69764822	4.39647	Intron (NM_015570, Intron 4 of 18)	700861	26053	AUTS2	activator of transcription and developmental regulator AUTS2
0.0219308	chr7	105287732	105288731	11.641	Intron (NM_138495, Intron 2 of 9)	31371	222255	ATXN7L1	ataxin 7 like 1
0.0221976	chr7	111290466	111291469	10.4861	Intergenic	-88394	83943	IMMP2L	inner mitochondrial membrane peptidase subunit 2
0.0225071	chr7	73246168	73247209	24.6	3' UTR (NM_001305, Exon 1 of 1)	1495	1364	CLDN4	claudin 4
0.0228683	chr7	64145830	64147597	10.4969	Non-coding (NR_104148, Exon 4 of 4)	7271	102465505	MIR6839	microRNA 6839
0.0234555	chr7	20256924	20257925	35.4563	Promoter-TSS (NM_182762)	224	100506098	LOC100506098	uncharacterized LOC100506098
0.0237148	chr7	47411271	47412285	8.07486	Intron (NM_022748, Intron 16 of 30)	92623	109623468	SNORD151	small nucleolar RNA, C/D box 151
0.0238272	chr7	148902884	148903883	12.209	Intron (NM_003575, Intron 2 of 7)	10745	8427	ZNF282	zinc finger protein 282
0.024023	chr7	82163735	82164740	11.5993	Intergenic	-90965	781	CACNA2D1	calcium voltage-gated channel auxiliary subunit alpha2delta 1
0.0241103	chr7	39052535	39053534	13.3961	Non-coding (NR_138047, Exon 1 of 7)	133	100689074	POU6F2-AS2	POU6F2 antisense RNA 2
0.0243841	chr7	101958784	101959794	20.2671	Intron (NM_001359228, Intron 5 of 6)	22920	100422858	MIR4285	microRNA 4285
0.0244122	chr7	75864056	75865180	17.5832	Intron (NM_001110199, Intron 2 of 15)	33404	222183	SRRM3	serine/arginine repetitive matrix 3
0.0244744	chr7	127899414	127900465	15.0397	Intergenic	18608	3952	LEP	leptin
0.0247349	chr7	17598235	17599267	15.1554	Promoter-TSS (NR_110013)	-218	101927630	LOC101927630	uncharacterized LOC101927630
0.0248619	chr7	78685049	78686050	15.2419	Intron (NM_012301, Intron 1 of 21)	47245	100874021	MAGI2-AS2	MAGI2 antisense RNA 2
0.0256	chr7	36985229	36986235	12.2438	Intron (NM_001206482, Intron 16 of 21)	-26695	100302113	MIR1200	microRNA 1200
0.0258562	chr7	75933787	75934795	75.7189	TTS (NM_001540)	2301	3315	HSPB1	heat shock protein family B (small) member 1
0.02605	chr7	12337059	12338058	3.69625	Intergenic	86638	54664	TMEM106B	transmembrane protein 106B
0.0261263	chr7	106874558	106875575	9.85205	Intron (NM_006348, Intron 18 of 21)	65618	26959	HBP1	HMG-box transcription factor 1
0.0264207	chr7	118003475	118004549	6.78269	Intergenic	139254	56311	ANKRD7	ankyrin repeat domain 7
0.0265197	chr7	23230231	23231261	8.42812	Intron (NM_001370446, Intron 3 of 7)	9079	11097	NUP42	nucleoporin 42
0.0274313	chr7	131715401	131716400	7.38979	Intergenic	120921	101928782	LOC101928782	uncharacterized LOC101928782
0.0277279	chr7	151689062	151690096	6.24743	Intron (NR_033169, Intron 6 of 9)	-33180	#N/A
0.0278937	chr7	100875420	100876433	23.1011	Exon (NM_001185080, Exon 5 of 6)	5157	24146	CLDN15	claudin 15
0.0282835	chr7	149387499	149388652	66.2189	Intergenic	-24027	84626	KRBA1	KRAB-A domain containing 1
0.0291644	chr7	149371501	149372506	16.0422	Intergenic	-40099	84626	KRBA1	KRAB-A domain containing 1
0.0292496	chr7	101131754	101132753	8.40428	Intron (NM_001278563, Intron 3 of 13)	80033	100506527	LINC01007	long intergenic non-protein coding RNA 1007
0.0297122	chr7	134651130	134652129	6.67568	Intron (NM_033138, Intron 14 of 14)	-19630	340351	AGBL3	ATP/GTP binding protein like 3
0.0297388	chr7	64218252	64219314	11.3285	Intergenic	-36023	7697	ZNF138	zinc finger protein 138
0.0304613	chr7	42908698	42909714	14.0909	Intergenic	42236	79020	C7orf25	chromosome 7 open reading frame 25
0.0311027	chr7	101207727	101208761	9.56606	TTS (NR_103747)	4042	100506527	LINC01007	long intergenic non-protein coding RNA 1007
0.031139	chr7	82137082	82138091	23.9033	Intergenic	-64314	781	CACNA2D1	calcium voltage-gated channel auxiliary subunit alpha2delta 1
0.0311391	chr7	47990640	47991650	9.88308	Intergenic	-3057	168507	PKD1L1	polycystin 1 like 1, transient receptor potential channel interacting
0.0312362	chr7	32504107	32505106	13.0541	Intergenic	-6500	100130673	LOC100130673	phosphoribosyl pyrophosphate synthetase 2 pseudogene
0.0316441	chr7	97715240	97716271	26.3068	Intergenic	-20419	22853	LMTK2	lemur tyrosine kinase 2
0.0323561	chr7	101513687	101514742	35.3054	Intron (NM_181552, Intron 1 of 23)	53308	1523	CUX1	cut like homeobox 1
0.0323888	chr7	123915751	123916750	4.63937	Intergenic	75900	101928211	LOC101928211	uncharacterized LOC101928211
0.0324107	chr7	920766	921773	13.4732	Intron (NM_015949, Intron 1 of 8)	5078	51608	GET4	guided entry of tail-anchored proteins factor 4
0.0325274	chr7	128070879	128071914	10.1815	Intergenic	-21360	3614	IMPDH1	inosine monophosphate dehydrogenase 1
0.0328816	chr7	113584717	113585735	11.8999	Intergenic	-26162	5506	PPP1R3A	protein phosphatase 1 regulatory subunit 3A
0.0328928	chr7	121923955	121925375	15.4106	Intergenic	-19047	154860	FEZF1-AS1	FEZF1 antisense RNA 1
0.0332008	chr7	134249992	134250991	10.047	Intron (NR_160301, Intron 2 of 3)	16629	441282	AKR1B15	aldo-keto reductase family 1 member B15
0.0332176	chr7	32719863	32720862	7.08022	Intron (NR_036680, Intron 2 of 16)	38418	100129460	DPY19L1P1	DPY19L1 pseudogene 1
0.0332347	chr7	100526771	100527795	8.53245	Intergenic	-19883	4584	MUC3A	mucin 3A, cell surface associated
0.0333061	chr7	106841980	106842982	12.8612	3' UTR (NM_001244262, Exon 11 of 11)	33033	26959	HBP1	HMG-box transcription factor 1
0.0334017	chr7	56263589	56264680	9.74269	Intergenic	-80024	389493	NUPR2	nuclear protein 2, transcriptional regulator
0.0338142	chr7	71790992	71792007	10.0027	Intron (NM_001363460, Intron 1 of 5)	10877	83698	CALN1	calneuron 1
0.034522	chr7	89347953	89349053	5.08745	Intergenic	-400211	442523	DPY19L2P4	DPY19L2 pseudogene 4
0.0346079	chr7	29275303	29276302	6.20872	Intron (NM_001293072, Intron 1 of 12)	-27216	102724484	LOC102724484	uncharacterized LOC102724484
0.034825	chr7	23884119	23885133	6.89824	Intergenic	134788	56164	STK31	serine/threonine kinase 31
0.0351955	chr7	34076373	34077372	8.86868	Intron (NM_001365308, Intron 6 of 14)	131721	168667	BMPER	BMP binding endothelial regulator
0.0355025	chr7	32466991	32467990	7.72331	Exon (NM_001322059, Exon 1 of 18)	346	5137	PDE1C	phosphodiesterase 1C
0.0357128	chr7	155031058	155032103	13.0674	Intergenic	-57902	3638	INSIG1	insulin induced gene 1
0.0370238	chr7	113660933	113661953	17.1699	Intergenic	-64939	93986	FOXP2	forkhead box P2
0.0373235	chr7	157285328	157286406	15.1774	Intron (NR_110157, Intron 2 of 3)	26942	101927914	LOC101927914	uncharacterized LOC101927914
0.0374808	chr7	142583011	142584065	20.0136	Promoter-TSS (NM_018646)	-48	55503	TRPV6	transient receptor potential cation channel subfamily V member 6
0.0375033	chr7	73156263	73157842	35.2884	Intergenic	-3855	83451	ABHD11	abhydrolase domain containing 11
0.0375829	chr7	73995980	73997097	10.5666	Intron (NM_016328, Intron 22 of 26)	-13757	113218504	MIR10525	microRNA 10525
0.037828	chr7	110162581	110163580	6.84567	Intergenic	-562810	442720	EIF3IP1	eukaryotic translation initiation factor 3 subunit I pseudogene 1
0.0383568	chr7	99619994	99620993	5.63957	Intron (NM_001346581, Intron 2 of 6)	7274	7586	ZKSCAN1	zinc finger with KRAB and SCAN domains 1
0.0384734	chr7	95271186	95272185	5.33588	Intergenic	-45857	5166	PDK4	pyruvate dehydrogenase kinase 4
0.0384964	chr7	6095248	6096310	17.0581	Intron (NM_001134335, Intron 1 of 14)	3027	27102	EIF2AK1	eukaryotic translation initiation factor 2 alpha kinase 1
0.0388235	chr7	39055901	39056903	16.9674	Intron (NM_007252, Intron 2 of 10)	-3235	100689074	POU6F2-AS2	POU6F2 antisense RNA 2
0.0390211	chr7	26416312	26417311	11.0748	Promoter-TSS (NR_136271)	-490	105375304	LOC105375304	uncharacterized LOC105375304
0.0395875	chr7	41098692	41099697	8.10141	Intergenic	-42008	101928773	LINC01449	long intergenic non-protein coding RNA 1449
0.0403234	chr7	91459003	91460002	8.87652	Intergenic	50514	7978	MTERF1	mitochondrial transcription termination factor 1
0.0404642	chr7	101916819	101917845	13.8106	Intron (NM_001202544, Intron 14 of 21)	-11100	10603	SH2B2	SH2B adaptor protein 2
0.0407862	chr7	26122516	26123522	10.8094	Intergenic	-68799	9603	NFE2L3	nuclear factor, erythroid 2 like 3
0.0408674	chr7	102130801	102131859	188.234	Intron (NM_001277335, Intron 16 of 19)	-11961	5439	POLR2J	RNA polymerase II subunit J
0.0410447	chr7	131712960	131713959	6.06753	Intergenic	118480	101928782	LOC101928782	uncharacterized LOC101928782
0.0411254	chr7	35064864	35065907	19.6833	Intron (NM_015283, Intron 1 of 21)	11712	23333	DPY19L1	dpy-19 like C-mannosyltransferase 1
0.0412928	chr7	94730471	94731470	7.33748	Intron (NM_017650, Intron 2 of 15)	191760	55607	PPP1R9A	protein phosphatase 1 regulatory subunit 9A
0.0413194	chr7	50560149	50561148	5.8862	Exon (NM_001242890, Exon 10 of 10)	-38809	100129427	DDC-AS1	DDC antisense RNA 1
0.0414913	chr7	102229985	102231005	184.934	Intron (NM_001277335, Intron 16 of 19).2	-17427	548644	POLR2J3	RNA polymerase II subunit J3
0.0417893	chr7	17017759	17018758	8.5428	Intergenic	-96651	155465	AGR3	anterior gradient 3, protein disulphide isomerase family member
0.04271	chr7	73206581	73207684	10.8596	Intergenic	-22532	1365	CLDN3	claudin 3
0.0434762	chr7	101887607	101888606	6.66238	Intron (NM_001202543, Intron 23 of 23)	-40326	10603	SH2B2	SH2B adaptor protein 2
0.0436895	chr7	73244864	73245864	30.7213	5' UTR (NM_001305, Exon 1 of 1)	171	1364	CLDN4	claudin 4
0.0440421	chr7	122474330	122475330	7.5295	Intron (NM_001009571, Intron 1 of 27)	51684	93664	CADPS2	calcium dependent secretion activator 2
0.0443531	chr7	104646767	104647847	31.4175	Intergenic	7281	100216545	KMT2E-AS1	KMT2E antisense RNA 1
0.0443953	chr7	107408420	107409436	9.34838	Intron (NM_000111, Intron 18 of 20)	-23902	101927974	LOC101927974	uncharacterized LOC101927974
0.0444189	chr7	75718872	75719877	11.9907	Intergenic	18706	101927126	GTF2IP7	general transcription factor IIi pseudogene 7
0.0448433	chr7	8035750	8036749	16.6176	Intron (NM_138426, Intron 1 of 7)	27822	113263	GLCCI1	glucocorticoid induced 1
0.0451267	chr7	4082441	4083494	13.7149	Intron (NM_152744, Intron 17 of 44)	-86350	221935	SDK1	sidekick cell adhesion molecule 1
0.0458216	chr7	139167942	139169007	16.1926	Promoter-TSS (NM_198508)	-55	346689	KLRG2	killer cell lectin like receptor G2
0.0458377	chr7	68877239	68878266	9.74704	Intergenic	184858	100507468	CT66	cancer/testis associated transcript 66
0.0459578	chr7	66643834	66644833	7.09003	Intron (NR_134540, Intron 12 of 14)	-64949	100616310	MIR4650-1	microRNA 4650-1
0.0473166	chr7	148850802	148851865	14.0356	Exon (NM_170686, Exon 2 of 6)	6788	57541	ZNF398	zinc finger protein 398
0.0474047	chr7	149341611	149342610	8.85272	Intergenic	-20229	79970	ZNF767P	zinc finger family member 767, pseudogene
0.047503	chr7	102232850	102233854	229.3	Intron (NM_001277335, Intron 15 of 19).2	-20284	548644	POLR2J3	RNA polymerase II subunit J3
0.0477308	chr7	122831023	122832025	23.1802	Intron (NM_001324400, Intron 1 of 17)	8499	6561	SLC13A1	solute carrier family 13 member 1
0.0478161	chr7	102528707	102529706	7.46413	Intron (NR_105043, Intron 12 of 20)	-24241	10234	LRRC17	leucine rich repeat containing 17
0.0478932	chr7	7504699	7505698	6.53553	Intron (NM_001037763, Intron 15 of 34)	70306	340267	COL28A1	collagen type XXVIII alpha 1 chain
0.048696	chr7	17657831	17658909	9.86002	Intergenic	-59837	101927630	LOC101927630	uncharacterized LOC101927630
0.0491797	chr7	1208645	1210189	9.46246	Intergenic	8996	101927021	LOC101927021	uncharacterized LOC101927021
0.0494148	chr7	144938129	144939196	6.58242	Intergenic	-405516	27010	TPK1	thiamin pyrophosphokinase 1
0.0495513	chr7	7154140	7155139	6.37849	Intergenic	-18222	100131257	LOC100131257	zinc finger protein 655 pseudogene
0.0509623	chr7	143664150	143665152	10.7586	Intergenic	7631	26211	OR2F1	olfactory receptor family 2 subfamily F member 1 (gene/pseudogene)
0.0514529	chr7	68264100	68265512	12.0967	Intergenic	779566	102723427	LOC102723427	uncharacterized LOC102723427
0.0524907	chr7	102133347	102134378	107.156	Intron (NM_001277335, Intron 15 of 19)	-14493	5439	POLR2J	RNA polymerase II subunit J
0.0528823	chr7	101447957	101448980	9.71543	Intergenic	-10819	1523	CUX1	cut like homeobox 1
0.053015	chr7	158768112	158769150	17.9721	Intergenic	-32414	154822	LINC00689	long intergenic non-protein coding RNA 689
0.0533613	chr7	64408822	64409821	6.56866	Intergenic	42093	51351	ZNF117	zinc finger protein 117
0.0541027	chr7	110413810	110414814	6.55458	Intron (NM_001350963, Intron 5 of 5)	-316750	54674	LRRN3	leucine rich repeat neuronal 3
0.0543035	chr7	114643854	114644853	5.73721	Intron (NM_001166345, Intron 4 of 4)	-74659	102724386	LINC01393	long intergenic non-protein coding RNA 1393
0.0545602	chr7	5565861	5566860	126.504	TTS (NM_001101)	3872	60	ACTB	actin beta
0.0547466	chr7	112121575	112122587	71.3444	Intron (NM_182597, Intron 1 of 3)	1035	286006	LSMEM1	leucine rich single-pass membrane protein 1
0.0550872	chr7	123210163	123211187	7.97712	Intron (NR_111926, Intron 4 of 7)	-12717	4698	NDUFA5	NADH:ubiquinone oxidoreductase subunit A5
0.0553329	chr7	155005860	155006909	22.6882	Intergenic	-83098	3638	INSIG1	insulin induced gene 1
0.0564365	chr7	63505293	63506292	5.38703	Promoter-TSS (NM_001159522)	-20	442319	ZNF727	zinc finger protein 727
0.0568999	chr7	23761897	23762896	6.56199	Intron (NM_001260504, Intron 4 of 23)	12558	56164	STK31	serine/threonine kinase 31
0.0572889	chr7	16718236	16719235	6.3353	Intron (NM_001362718, Intron 3 of 10)	17896	28969	BZW2	basic leucine zipper and W2 domains 2
0.0573933	chr7	106266964	106267963	5.92241	Intergenic	34141	168455	CCDC71L	coiled-coil domain containing 71 like
0.0574606	chr7	30205321	30206434	8.42695	Intergenic	31275	222166	MTURN	maturin, neural progenitor differentiation regulator homolog
0.0580991	chr7	151515896	151516897	15.9481	Intron (NM_016203, Intron 1 of 15)	-4439	51422	PRKAG2	protein kinase AMP-activated non-catalytic subunit gamma 2
0.058265	chr7	98759639	98760754	19.9904	Intergenic	-18465	57154	SMURF1	SMAD specific E3 ubiquitin protein ligase 1
0.0586059	chr7	2451479	2452480	15.7749	Intron (NM_018641, Intron 1 of 1)	8733	55501	CHST12	carbohydrate sulfotransferase 12
0.0589242	chr7	102328765	102329787	153.186	Intron (NR_146066, Intron 7 of 11)	-17094	246721	POLR2J2	RNA polymerase II subunit J2
0.0589507	chr7	134273799	134275170	19.4932	Intergenic	40622	441282	AKR1B15	aldo-keto reductase family 1 member B15
0.0589708	chr7	11825507	11826537	5.79744	Intron (NM_015204, Intron 1 of 26)	45802	221981	THSD7A	thrombospondin type 1 domain containing 7A
0.059302	chr7	2372675	2373680	6.45877	Intergenic	-19101	29886	SNX8	sorting nexin 8
0.0593541	chr7	73385806	73386833	6.86731	Intergenic	-55800	2006	ELN	elastin
0.0595593	chr7	144474223	144475222	5.93757	Intron (NM_001350887, Intron 1 of 6)	-38731	27010	TPK1	thiamin pyrophosphokinase 1
0.060484	chr7	104664860	104665887	16.3753	Intron (NM_182931, Intron 1 of 26)	10721	55904	KMT2E	lysine methyltransferase 2E
0.0605308	chr7	67785725	67786724	5.28364	Intergenic	300984	102723427	LOC102723427	uncharacterized LOC102723427
0.0606703	chr7	51330893	51331917	9.12072	Intron (NM_001346441, Intron 1 of 12)	53101	23242	COBL	cordon-bleu WH2 repeat protein
0.0607681	chr7	43804103	43805186	14.1674	Intron (NM_001253823, Intron 2 of 8)	6365	644	BLVRA	biliverdin reductase A
0.0609658	chr7	135205111	135206110	8.32318	Intergenic	-10735	4850	CNOT4	CCR4-NOT transcription complex subunit 4
0.0612559	chr7	141362724	141363724	17.8313	Intron (NM_001080392, Intron 8 of 8)	38742	57189	DENND11	DENN domain containing 11
0.0613434	chr7	73473854	73474853	9.22979	Exon (NM_001278917, Exon 22 of 32)	-23781	3984	LIMK1	LIM domain kinase 1
0.0615269	chr7	55841655	55842654	8.03843	Intergenic	-69894	360132	FKBP9P1	FKBP prolyl isomerase 9 pseudogene 1
0.061666	chr7	129947935	129948934	6.15732	Intron (NM_016352, Intron 8 of 10)	15460	51200	CPA4	carboxypeptidase A4
0.0620884	chr7	90917260	90918259	6.59448	Intergenic	24011	8321	FZD1	frizzled class receptor 1
0.0621794	chr7	107998628	107999657	11.3032	Intron (NM_001371131, Intron 2 of 33)	-30172	#N/A
0.0635088	chr7	139131601	139132631	10.2479	Intergenic	-19844	100129148	LOC100129148	uncharacterized LOC100129148
0.0642173	chr7	103300672	103301709	16.9452	Intron (NM_173054, Intron 12 of 63)	-214536	375611	SLC26A5	solute carrier family 26 member 5
0.064503	chr7	137648771	137649770	5.31357	Intron (NM_194071, Intron 1 of 11)	11176	100130880	CREB3L2-AS1	CREB3L2 antisense RNA 1
0.0647183	chr7	12841388	12842502	12.6021	Intergenic	114687	10124	ARL4A	ADP ribosylation factor like GTPase 4A
0.0650941	chr7	69245008	69246007	5.61681	Intron (NM_001127232, Intron 1 of 4)	182046	26053	AUTS2	activator of transcription and developmental regulator AUTS2
0.0654586	chr7	83623695	83625035	8.3504	Intron (NM_006080, Intron 12 of 16)	199740	10371	SEMA3A	semaphorin 3A
0.0655721	chr7	73247284	73248283	21.4933	TTS (NM_001305)	2590	1364	CLDN4	claudin 4
0.0655773	chr7	154861342	154862389	8.68751	Promoter-TSS (NM_024012)	-169	3361	HTR5A	5-hydroxytryptamine receptor 5A
0.0660631	chr7	47615278	47616316	28.4892	Intron (NM_022748, Intron 1 of 30)	5912	64759	TNS3	tensin 3
0.0662439	chr7	152201189	152202197	11.0042	Intergenic	40484	100128822	LINC01003	long intergenic non-protein coding RNA 1003
0.0666026	chr7	105292480	105293488	16.8401	Intron (NM_001318229, Intron 3 of 9)	26618	222255	ATXN7L1	ataxin 7 like 1
0.066634	chr7	104619616	104620615	12.8288	Intergenic	11497	100216546	LINC01004	long intergenic non-protein coding RNA 1004
0.0666776	chr7	100226669	100227668	10.145	Intron (NM_003227, Intron 9 of 17)	4105	7036	TFR2	transferrin receptor 2
0.0673534	chr7	26120983	26122060	10.5415	Intergenic	-70297	9603	NFE2L3	nuclear factor, erythroid 2 like 3
0.0677866	chr7	104944536	104945543	9.24969	Intron (NM_001350738, Intron 2 of 16)	-5813	6733	SRPK2	SRSF protein kinase 2
0.0679023	chr7	38885597	38886596	3.60444	Intron (NM_014396, Intron 4 of 28)	62695	27072	VPS41	VPS41 subunit of HOPS complex
0.0679862	chr7	28101451	28102450	4.25196	Intron (NM_175061, Intron 1 of 4)	-118126	100128081	JAZF1-AS1	JAZF1 antisense RNA 1
0.0683089	chr7	6910814	6911823	9.91158	Intergenic	-45392	221960	CCZ1B	CCZ1 homolog B, vacuolar protein trafficking and biogenesis associated
0.0684749	chr7	91677413	91678412	7.79696	Intron (NM_147185, Intron 21 of 49)	85879	1595	CYP51A1	cytochrome P450 family 51 subfamily A member 1
0.0686161	chr7	80192927	80193962	12.6854	Intergenic	-38079	#N/A
0.0686727	chr7	95932100	95933099	7.26376	Intron (NM_001160210, Intron 1 of 17)	18811	10165	SLC25A13	solute carrier family 25 member 13
0.0695084	chr7	157081801	157082807	59.4554	Intergenic	-47394	10049	DNAJB6	DnaJ heat shock protein family (Hsp40) member B6
0.0697652	chr7	104502901	104503900	6.53822	Intron (NM_199000, Intron 2 of 2)	-58861	645591	LHFPL3-AS1	LHFPL3 antisense RNA 1
0.0700201	chr7	149713404	149714450	9.03487	Intron (NM_001351028, Intron 6 of 9)	-24517	100134040	LOC100134040	uncharacterized LOC100134040
0.0702997	chr7	25965322	25966321	3.95832	Intergenic	23785	406940	MIR148A	microRNA 148a
0.0703795	chr7	103087317	103088703	30.7081	Intron (NR_110141, Intron 2 of 3)	-1356	375611	SLC26A5	solute carrier family 26 member 5
0.0704222	chr7	87396902	87397910	15.1072	Intron (NM_001134405, Intron 6 of 10)	-54767	5243	ABCB1	ATP binding cassette subfamily B member 1
0.0706519	chr7	104739263	104740262	10.4005	Intron (NM_182931, Intron 15 of 26)	85110	55904	KMT2E	lysine methyltransferase 2E
0.0709143	chr7	42412567	42413575	5.98094	Intergenic	-136263	2737	GLI3	GLI family zinc finger 3
0.071379	chr7	27064603	27065602	7.49685	Intergenic	70517	3198	HOXA1	homeobox A1
0.0715354	chr7	98049985	98051003	15.1562	Intergenic	-20092	55971	BAIAP2L1	BAI1 associated protein 2 like 1
0.0720333	chr7	82328876	82329877	48.378	Intergenic	-256104	781	CACNA2D1	calcium voltage-gated channel auxiliary subunit alpha2delta 1
0.0720893	chr7	26491414	26492413	9.11001	Intron (NR_148500, Intron 2 of 5)	-52875	105375304	LOC105375304	uncharacterized LOC105375304
0.0727169	chr7	152498577	152499597	5.60618	Intron (NR_146951, Intron 4 of 11)	42250	57180	ACTR3B	actin related protein 3B
0.0733613	chr7	139115482	139116491	17.4884	Intergenic	-3714	100129148	LOC100129148	uncharacterized LOC100129148
0.0736058	chr7	73913092	73914091	10.4752	Intron (NM_016328, Intron 1 of 26)	45355	9569	GTF2IRD1	GTF2I repeat domain containing 1
0.0738092	chr7	17714224	17715223	5.17481	Intergenic	-116190	101927630	LOC101927630	uncharacterized LOC101927630
0.0753941	chr7	111138780	111139880	19.0145	Intron (NM_001350964, Intron 3 of 4)	63017	83943	IMMP2L	inner mitochondrial membrane peptidase subunit 2
0.076024	chr7	47732525	47733684	13.9808	Intergenic	38262	401335	C7orf65	chromosome 7 open reading frame 65
0.076341	chr7	86480614	86481613	10.7639	Intron (NM_001363522, Intron 4 of 4)	114102	222223	KIAA1324L	KIAA1324 like
0.0776519	chr7	6881953	6882964	12.1713	Intergenic	-16532	221960	CCZ1B	CCZ1 homolog B, vacuolar protein trafficking and biogenesis associated
0.0778972	chr7	80515310	80516309	13.326	Intron (NM_001350120, Intron 2 of 17)	32558	10512	SEMA3C	semaphorin 3C
0.0784909	chr7	110562655	110563710	7.35012	Intron (NM_001350959, Intron 6 of 7)	-167880	54674	LRRN3	leucine rich repeat neuronal 3
0.078809	chr7	8330254	8331253	4.65225	Intron (NR_125740, Intron 3 of 5)	-28511	3382	ICA1	islet cell autoantigen 1
0.0788737	chr7	112508898	112509917	6.29587	Intron (NM_152556, Intron 3 of 4)	70523	154743	BMT2	base methyltransferase of 25S rRNA 2 homolog
0.0789876	chr7	97501261	97502263	108.373	Promoter-TSS (NM_001673)	-42	440	ASNS	asparagine synthetase (glutamine-hydrolyzing)
0.0794598	chr7	156347095	156348094	3.77176	Intron (NR_026865, Intron 2 of 3)	14409	64433	LINC00244	long intergenic non-protein coding RNA 244
0.0795293	chr7	67711039	67712038	5.80294	Intergenic	226298	102723427	LOC102723427	uncharacterized LOC102723427
0.0795975	chr7	155015647	155016704	11.8154	Intergenic	-73307	3638	INSIG1	insulin induced gene 1
0.0800179	chr7	8429197	8430205	9.38495	Intergenic	-43538	30010	NXPH1	neurexophilin 1
0.0801314	chr7	43817854	43818853	4.35051	Intron (NM_001253823, Intron 3 of 8)	20074	644	BLVRA	biliverdin reductase A
0.0808046	chr7	100808376	100809393	22.3139	Promoter-TSS (NM_003378)	-34	7425	VGF	VGF nerve growth factor inducible
0.0808065	chr7	99577195	99578194	7.89439	Promoter-TSS (NR_036679)	-691	646282	AZGP1P1	AZGP1 pseudogene 1
0.0810088	chr7	39849592	39850591	10.7795	Intergenic	76924	349114	LINC00265	long intergenic non-protein coding RNA 265
0.0816193	chr7	54905853	54906852	7.09668	Intergenic	79346	100996654	LOC100996654	uncharacterized LOC100996654
0.0825227	chr7	66857326	66858331	10.1959	Intergenic	56865	101929736	LINC01372	long intergenic non-protein coding RNA 1372
0.0826283	chr7	138009823	138010822	9.35248	Intergenic	-134682	8805	TRIM24	tripartite motif containing 24
0.0828945	chr7	48106870	48107869	6.39697	Intergenic	-20831	7378	UPP1	uridine phosphorylase 1
0.0829749	chr7	106597861	106598860	6.51393	Intergenic	-86790	5577	PRKAR2B	protein kinase cAMP-dependent type II regulatory subunit beta
0.0834196	chr7	143105612	143106611	7.0231	Promoter-TSS (NM_005232)	-162	2041	EPHA1	EPH receptor A1
0.0842564	chr7	106587360	106588359	4.68865	Intergenic	81935	5294	PIK3CG	phosphatidylinositol-4,5-bisphosphate 3-kinase catalytic subunit gamma
0.0848838	chr7	97678010	97679021	11.7746	Intergenic	-57659	22853	LMTK2	lemur tyrosine kinase 2
0.0856561	chr7	105331818	105332832	19.7781	Intron (NM_020725, Intron 3 of 11)	-12716	222255	ATXN7L1	ataxin 7 like 1
0.0856748	chr7	32885914	32886925	11.2092	Intergenic	20505	102724668	DPY19L1P2	DPY19L1 pseudogene 2
0.0874421	chr7	8636597	8637596	6.08921	Intron (NM_152745, Intron 2 of 2)	163857	30010	NXPH1	neurexophilin 1
0.0880683	chr7	105172092	105173101	102.158	Promoter-TSS (NM_021930)	-52	60561	RINT1	RAD50 interactor 1
0.0883114	chr7	114045164	114046183	7.63945	Intron (NR_033766, Intron 2 of 19)	-9197	93986	FOXP2	forkhead box P2
0.0888411	chr7	102523253	102524252	8.84578	Exon (NM_145032, Exon 14 of 20)	-29695	10234	LRRC17	leucine rich repeat containing 17
0.0892075	chr7	99650557	99651556	9.68126	Intron (NM_001362780, Intron 2 of 4)	3639	7589	ZSCAN21	zinc finger and SCAN domain containing 21
0.0893734	chr7	73225710	73226709	6.60131	Intergenic	-18984	1364	CLDN4	claudin 4
0.0896564	chr7	22472504	22473608	19.0162	Intron (NM_207342, Intron 4 of 4)	66845	256227	STEAP1B	STEAP family member 1B
0.0901152	chr7	102179468	102180468	28.9879	Intron (NM_001097615, Intron 8 of 8)	5267	107983993	UPK3BL2	uroplakin 3B like 2
0.0902898	chr7	42153753	42154752	3.95099	Intron (NM_000168, Intron 3 of 14)	122556	2737	GLI3	GLI family zinc finger 3
0.0904823	chr7	82223718	82224717	11.0529	Intergenic	-150945	781	CACNA2D1	calcium voltage-gated channel auxiliary subunit alpha2delta 1
0.0910122	chr7	158155349	158156348	7.18782	Intron (NM_130842, Intron 1 of 21)	169657	693180	MIR595	microRNA 595
0.0916919	chr7	109219255	109220254	5.19724	Intergenic	380516	442720	EIF3IP1	eukaryotic translation initiation factor 3 subunit I pseudogene 1
0.0917294	chr7	97881088	97882099	88.5297	Promoter-TSS (NM_015395)	-49	25851	TECPR1	tectonin beta-propeller repeat containing 1
0.0923486	chr7	44075554	44076597	71.4821	Intron (NR_024116, Intron 5 of 8)	-2573	255031	LINC00957	long intergenic non-protein coding RNA 957
0.0924383	chr7	111126360	111127359	4.55794	Intron (NM_001350964, Intron 4 of 4)	75488	83943	IMMP2L	inner mitochondrial membrane peptidase subunit 2
0.0927141	chr7	102278559	102279575	33.4985	Intron (NM_032959, Intron 8 of 8)	4171	100134938	UPK3BL1	uroplakin 3B like 1
0.0933859	chr7	105574732	105575731	8.01889	Intergenic	-28479	222256	CDHR3	cadherin related family member 3
0.0938692	chr7	86720503	86721502	7.15905	Intergenic	-32032	222223	KIAA1324L	KIAA1324 like
0.095001	chr7	157293280	157294401	47.6986	Intergenic	34915	101927914	LOC101927914	uncharacterized LOC101927914
0.0951501	chr7	100895191	100896205	58.1768	Intergenic	-7336	51024	FIS1	fission, mitochondrial 1
0.0952301	chr7	157148582	157149647	15.3024	Intron (NM_058246, Intron 1 of 9)	19416	10049	DNAJB6	DnaJ heat shock protein family (Hsp40) member B6
0.0965368	chr7	3439208	3440207	6.03106	Intron (NM_152744, Intron 1 of 44)	98823	221935	SDK1	sidekick cell adhesion molecule 1
0.0966005	chr7	107592615	107593615	73.7191	Intron (NM_002291, Intron 22 of 33)	50491	3912	LAMB1	laminin subunit beta 1
0.0968871	chr7	29489235	29490234	6.36967	Intron (NM_001293072, Intron 6 of 12)	-29594	1124	CHN2	chimerin 2
0.0970304	chr7	128177161	128178227	7.16476	Intergenic	60911	55798	METTL2B	methyltransferase like 2B
0.0970454	chr7	97909720	97911079	26.102	Promoter-TSS (NM_001159491)	-599	25798	BRI3	brain protein I3
0.0971225	chr7	105793975	105794976	9.45756	Intergenic	-41453	6856	SYPL1	synaptophysin like 1
0.0975452	chr7	108025222	108026221	7.49906	Intron (NR_163871, Intron 2 of 29)	-56751	#N/A
0.0978713	chr7	82747955	82749015	12.8858	Intron (NM_014510, Intron 3 of 19)	43715	27445	PCLO	piccolo presynaptic cytomatrix protein
0.0991013	chr7	2772544	2773579	8.4701	Intron (NM_001293092, Intron 2 of 2)	29713	2768	GNA12	G protein subunit alpha 12
0.0996118	chr7	94875865	94876864	4.6591	Intron (NM_017650, Intron 7 of 15)	77480	5444	PON1	paraoxonase 1
0.0997719	chr7	112538421	112539420	7.10615	Intron (NM_152556, Intron 2 of 4)	41010	154743	BMT2	base methyltransferase of 25S rRNA 2 homolog
0.0998717	chr7	105681216	105682215	9.19488	Intergenic	71043	6856	SYPL1	synaptophysin like 1
0.0999084	chr7	127154237	127155236	5.74561	Intergenic	37799	100506682	LOC100506682	uncharacterized LOC100506682
0.100369	chr7	8391340	8392339	9.71194	Intergenic	-81400	30010	NXPH1	neurexophilin 1
0.100569	chr7	129962110	129963155	8.24067	3' UTR (NM_001163446, Exon 10 of 10)	-22024	93979	CPA5	carboxypeptidase A5
0.100588	chr7	99436976	99437975	5.52175	Intron (NM_001278921, Intron 4 of 9)	11839	64816	CYP3A43	cytochrome P450 family 3 subfamily A member 43
0.101058	chr7	149798037	149799142	11.453	Intron (NM_001351028, Intron 6 of 9)	-53785	653857	ACTR3C	actin related protein 3C
0.102381	chr7	131909682	131910694	12.5632	Intron (NM_020911, Intron 8 of 31)	-35432	101928807	LOC101928807	uncharacterized LOC101928807
0.102855	chr7	111381485	111382491	8.14466	Intron (NM_001363540, Intron 45 of 52)	-66573	100506413	DOCK4-AS1	DOCK4 antisense RNA 1
0.103232	chr7	6412821	6414117	78.143	Promoter-TSS (NM_018890)	-689	5879	RAC1	Rac family small GTPase 1
0.10371	chr7	107749440	107750439	6.75983	Intron (NM_001318047, Intron 4 of 22)	20867	22798	LAMB4	laminin subunit beta 4
0.104164	chr7	112031415	112032451	58.03	Intergenic	-31266	3475	IFRD1	interferon related developmental regulator 1
0.104294	chr7	89975439	89976461	38.9447	Promoter-TSS (NM_001042717)	-80	85865	GTPBP10	GTP binding protein 10
0.10478	chr7	95178748	95179794	18.2261	Intergenic	46557	5166	PDK4	pyruvate dehydrogenase kinase 4
0.106506	chr7	102212549	102213558	36.2515	Promoter-TSS (NM_001097615)	15	548644	POLR2J3	RNA polymerase II subunit J3
0.107609	chr7	87043093	87044243	12.5386	Intron (NM_000443, Intron 21 of 27)	61328	5244	ABCB4	ATP binding cassette subfamily B member 4
0.107673	chr7	149359320	149360350	15.3189	Intergenic	-37954	79970	ZNF767P	zinc finger family member 767, pseudogene
0.107964	chr7	107519493	107520496	11.0147	Intergenic	-11558	1738	DLD	dihydrolipoamide dehydrogenase
0.108123	chr7	98062291	98063290	6.82739	Intergenic	-32388	55971	BAIAP2L1	BAI1 associated protein 2 like 1
0.108133	chr7	35754200	35755199	6.19903	Intergenic	-1348	100506725	LOC100506725	uncharacterized LOC100506725
0.109034	chr7	77308631	77309630	9.7822	Intron (NR_134251, Intron 2 of 3)	16452	100505854	APTR	Alu-mediated CDKN1A/p21 transcriptional regulator
0.109307	chr7	44151864	44152946	11.9834	Exon (NM_001129, Exon 18 of 21)	1957	100616346	MIR4649	microRNA 4649
0.109724	chr7	102714821	102715846	109.447	Promoter-TSS (NM_001161009)	5	83787	ARMC10	armadillo repeat containing 10
0.110062	chr7	4208808	4209820	11.1902	Intron (NM_152744, Intron 32 of 44)	-34845	105375131	LOC105375131	uncharacterized LOC105375131
0.110167	chr7	25607806	25608805	9.30903	Intergenic	94455	646588	LOC646588	uncharacterized LOC646588
0.110497	chr7	100806731	100807730	25.0333	Exon (NM_003378, Exon 2 of 2)	1620	7425	VGF	VGF nerve growth factor inducible
0.110979	chr7	112409814	112410814	20.4098	Intron (NR_109840, Intron 3 of 3)	20134	64418	TMEM168	transmembrane protein 168
0.111676	chr7	96225006	96226096	7.87691	Intron (NR_163950, Intron 3 of 6)	68099	7979	SEM1	SEM1 26S proteasome complex subunit
0.112394	chr7	148562084	148563105	9.64477	Intron (NM_004456, Intron 1 of 19)	17983	2146	EZH2	enhancer of zeste 2 polycomb repressive complex 2 subunit
0.11253	chr7	101080204	101081205	8.51271	Intron (NM_133457, Intron 2 of 13)	74548	136227	COL26A1	collagen type XXVI alpha 1 chain
0.112606	chr7	155714342	155715368	12.0718	Intergenic	-39058	389602	LOC389602	uncharacterized LOC389602
0.112926	chr7	80171444	80172461	11.3869	Intergenic	-30572	346562	GNAT3	G protein subunit alpha transducin 3
0.11373	chr7	100449770	100450788	88.8724	Promoter-TSS (NM_001267812)	-43	105375430	SLC12A9-AS1	SLC12A9 antisense RNA 1
0.114673	chr7	34380562	34381569	8.12141	Intergenic	-316765	387129	NPSR1	neuropeptide S receptor 1
0.114913	chr7	110082041	110083055	6.6656	Intergenic	-482278	442720	EIF3IP1	eukaryotic translation initiation factor 3 subunit I pseudogene 1
0.11496	chr7	105649591	105650604	55.7067	Intron (NM_152750, Intron 8 of 18)	46387	222256	CDHR3	cadherin related family member 3
0.115103	chr7	100550353	100551352	9.98888	Exon (NM_005960, Exon 4 of 15)	3686	4584	MUC3A	mucin 3A, cell surface associated
0.115843	chr7	106809751	106810915	70.5578	Intron (NM_012257, Intron 1 of 10)	885	26959	HBP1	HMG-box transcription factor 1
0.116056	chr7	91388267	91389271	7.671	Intergenic	121247	7978	MTERF1	mitochondrial transcription termination factor 1
0.116891	chr7	158346501	158347500	7.05405	Intron (NM_001308267, Intron 1 of 21)	-12532	5799	PTPRN2	protein tyrosine phosphatase receptor type N2
0.117421	chr7	122882479	122883511	10.7407	Intergenic	-42970	6561	SLC13A1	solute carrier family 13 member 1
0.119964	chr7	113404108	113405237	14.7118	Intergenic	154392	5506	PPP1R3A	protein phosphatase 1 regulatory subunit 3A
0.120545	chr7	94272762	94274180	12.0572	Intron (NM_001362807, Intron 1 of 11)	11974	8910	SGCE	sarcoglycan epsilon
0.120692	chr7	106808561	106809579	167.045	Promoter-TSS (NM_001244262)	-336	26959	HBP1	HMG-box transcription factor 1
0.121346	chr7	92219253	92220255	56.6999	Promoter-TSS (NM_001288584)	-50	257415	FAM133B	family with sequence similarity 133 member B
0.121541	chr7	73184119	73185189	37.3494	Promoter-TSS (NM_001306)	-54	1365	CLDN3	claudin 3
0.122265	chr7	104908233	104910008	16.9408	Intron (NM_001350741, Intron 2 of 16)	404	6733	SRPK2	SRSF protein kinase 2
0.122293	chr7	93071793	93072792	4.76029	Intron (NM_001742, Intron 9 of 13)	39875	724023	MIR653	microRNA 653
0.123615	chr7	105288898	105289935	14.774	Intron (NM_138495, Intron 2 of 9)	30186	222255	ATXN7L1	ataxin 7 like 1
0.123627	chr7	99760364	99761409	10.8451	Intron (NM_024637, Intron 3 of 3)	-4540	55262	MAP11	microtubule associated protein 11
0.124784	chr7	23285843	23286855	15.4381	Promoter-TSS (NM_002510)	-45	10457	GPNMB	glycoprotein nmb
0.124916	chr7	74212315	74213474	26.1816	Intron (NM_173537, Intron 15 of 15)	24585	653361	NCF1	neutrophil cytosolic factor 1
0.126025	chr7	148841788	148842789	55.4175	Intron (NM_020781, Intron 2 of 6)	-2257	57541	ZNF398	zinc finger protein 398
0.12706	chr7	112902787	112903824	30.8761	Intergenic	-144668	401397	SMIM30	small integral membrane protein 30
0.12711	chr7	134238409	134239415	8.09581	Intron (NR_160302, Intron 1 of 2)	5050	441282	AKR1B15	aldo-keto reductase family 1 member B15
0.128105	chr7	102312798	102313825	22.541	Intergenic	-1129	246721	POLR2J2	RNA polymerase II subunit J2
0.128448	chr7	72722347	72723357	11.2114	Promoter-TSS (NM_018044)	12	55695	NSUN5	NOP2/Sun RNA methyltransferase 5
0.128722	chr7	100951036	100952046	34.9389	Promoter-TSS (NR_110115)	-47	101927746	LOC101927746	uncharacterized LOC101927746
0.129099	chr7	83104449	83105454	6.53521	Intron (NM_001178129, Intron 2 of 16)	165796	9723	SEMA3E	semaphorin 3E
0.12961	chr7	99097435	99098436	26.6541	Promoter-TSS (NM_001345967)	-4	84124	ZNF394	zinc finger protein 394
0.131279	chr7	105305123	105306122	7.0974	Exon (NM_020725, Exon 4 of 12)	13980	222255	ATXN7L1	ataxin 7 like 1
0.131778	chr7	92053548	92054552	38.3933	Intron (NR_145992, Intron 5 of 9)	12578	105375396	TMBIM7P	transmembrane BAX inhibitor motif containing 7, pseudogene
0.132509	chr7	112062626	112063652	27.236	Promoter-TSS (NM_001197080)	-60	3475	IFRD1	interferon related developmental regulator 1
0.132789	chr7	7869016	7870015	6.38137	Intron (NM_001302350, Intron 4 of 4)	-111277	6119	RPA3	replication protein A3
0.133562	chr7	100047711	100048991	17.7635	Intergenic	13532	402573	C7orf61	chromosome 7 open reading frame 61
0.133728	chr7	105925288	105926305	162.298	Promoter-TSS (NM_005746)	-367	10135	NAMPT	nicotinamide phosphoribosyltransferase
0.13383	chr7	771521	772520	5.46397	Intron (NR_075098, Intron 2 of 12)	-4707	5575	PRKAR1B	protein kinase cAMP-dependent type I regulatory subunit beta
0.134818	chr7	127225171	127226179	36.5272	Promoter-TSS (NM_024523)	-25	79571	GCC1	GRIP and coiled-coil domain containing 1
0.135628	chr7	1494484	1495647	23.5317	Intron (NM_182924, Intron 1 of 16)	4041	79778	MICALL2	MICAL like 2
0.136156	chr7	89699220	89700238	6.39557	Intron (NR_110029, Intron 2 of 2)	-48985	442523	DPY19L2P4	DPY19L2 pseudogene 4
0.137092	chr7	73038397	73039430	15.4113	Promoter-TSS (NM_032951)	-61	51085	MLXIPL	MLX interacting protein like
0.137548	chr7	157793941	157794952	10.6005	Intron (NM_001308268, Intron 11 of 22)	147169	100506585	LOC100506585	uncharacterized LOC100506585
0.137572	chr7	34853471	34854488	6.71834	Intron (NM_207172, Intron 4 of 8)	19964	404744	NPSR1-AS1	NPSR1 antisense RNA 1
0.137605	chr7	37447605	37448604	4.04474	Intron (NM_001206480, Intron 1 of 21)	40451	9844	ELMO1	engulfment and cell motility 1
0.137613	chr7	83313981	83314981	39.966	Intergenic	-36026	9723	SEMA3E	semaphorin 3E
0.138621	chr7	94140721	94141720	7.69025	Intron (NM_001363428, Intron 1 of 17)	2099	64921	CASD1	CAS1 domain containing 1
0.138668	chr7	104653075	104655081	112.313	Promoter-TSS (NM_018682)	510	100216545	KMT2E-AS1	KMT2E antisense RNA 1
0.138746	chr7	95140730	95141737	7.02401	Intron (NM_016116, Intron 2 of 4)	25978	51666	ASB4	ankyrin repeat and SOCS box containing 4
0.138885	chr7	128236317	128237349	7.67877	Intergenic	-44462	402483	LINC01000	long intergenic non-protein coding RNA 1000
0.138973	chr7	98805331	98806335	15.1376	Promoter-TSS (NM_001145715)	-721	402569	KPNA7	karyopherin subunit alpha 7
0.139254	chr7	107531052	107532435	79.3578	Intron (NM_001289752, Intron 1 of 12)	115	1738	DLD	dihydrolipoamide dehydrogenase
0.139283	chr7	105069807	105070814	8.74484	Intergenic	-40473	6733	SRPK2	SRSF protein kinase 2
0.139482	chr7	97795103	97796109	13.3381	Intron (NM_014916, Intron 6 of 13)	-45960	168620	BHLHA15	basic helix-loop-helix family member a15
0.139931	chr7	108166129	108167292	205.645	Promoter-TSS (NM_001256008)	-131	50640	PNPLA8	patatin like phospholipase domain containing 8
0.13999	chr7	100933251	100934250	10.8861	Intergenic	-9144	101927721	LNCPRESS1	lncRNA p53 regulated and ESC associated 1
0.140036	chr7	8053529	8054528	5.24934	Intron (NM_138426, Intron 2 of 7)	45601	113263	GLCCI1	glucocorticoid induced 1
0.140281	chr7	70181218	70182217	5.30341	Intron (NM_015570, Intron 6 of 18)	-415413	64409	GALNT17	polypeptide N-acetylgalactosaminyltransferase 17
0.140507	chr7	158609361	158610361	13.8541	Intron (NM_001367773, Intron 1 of 22)	12339	57488	ESYT2	extended synaptotagmin 2
0.140525	chr7	94286904	94288002	319.708	Intron (NM_001172438, Intron 1 of 1)	1771	23089	PEG10	paternally expressed 10
0.140682	chr7	100486987	100488407	79.2097	Promoter-TSS (NM_001015072)	-361	402682	UFSP1	UFM1 specific peptidase 1 (inactive)
0.142325	chr7	100183419	100184551	186.453	Promoter-TSS (NM_002319)	34	26261	FBXO24	F-box protein 24
0.142663	chr7	108209629	108210822	133.149	Promoter-TSS (NM_012328)	-13	168451	THAP5	THAP domain containing 5
0.142699	chr7	95120955	95121992	9.23207	Intron (NM_016116, Intron 1 of 4)	6218	51666	ASB4	ankyrin repeat and SOCS box containing 4
0.142724	chr7	94065007	94066006	6.00227	Intergenic	41633	1278	COL1A2	collagen type I alpha 2 chain
0.142981	chr7	100964582	100965596	33.7434	Promoter-TSS (NM_001287525)	4	64792	IFT22	intraflagellar transport 22
0.143361	chr7	112758167	112759178	31.3087	Promoter-TSS (NM_001352688)	-35	401397	SMIM30	small integral membrane protein 30
0.143495	chr7	149400641	149401640	5.79764	Intergenic	-10962	84626	KRBA1	KRAB-A domain containing 1
0.143555	chr7	98962865	98963864	6.28314	Intron (NM_006409, Intron 9 of 9)	-8989	10095	ARPC1B	actin related protein 2/3 complex subunit 1B
0.143613	chr7	104523826	104524858	15.8851	Intron (NM_199000, Intron 2 of 2)	42750	723809	LHFPL3-AS2	LHFPL3 antisense RNA 2
0.143741	chr7	2479935	2480934	7.39976	3' UTR (NM_018641, Exon 2 of 2)	35583	402635	GRIFIN	galectin-related inter-fiber protein
0.144672	chr7	143589398	143590397	6.66997	Intron (NM_001206938, Intron 1 of 8)	-7434	9747	TCAF1	TRPM8 channel associated factor 1
0.145167	chr7	98362082	98363081	6.15929	Intergenic	105056	222865	TMEM130	transmembrane protein 130
0.145587	chr7	2212160	2213174	10.7044	Intron (NM_001304523, Intron 9 of 17)	59913	8379	MAD1L1	mitotic arrest deficient 1 like 1
0.146025	chr7	115912998	115913997	4.2442	Intergenic	13221	102724434	LOC102724434	uncharacterized LOC102724434
0.146409	chr7	100270538	100271551	37.1317	Promoter-TSS (NM_005273)	-319	2783	GNB2	G protein subunit beta 2
0.146484	chr7	73587054	73588117	11.6483	Intergenic	-1101	7458	EIF4H	eukaryotic translation initiation factor 4H
0.147853	chr7	99348878	99349909	13.1831	Intergenic	-16574	100861540	CYP3A7-CYP3A51P	CYP3A7-CYP3A51P readthrough
0.14821	chr7	92861081	92862118	57.2805	Promoter-TSS (NM_017667)	-54	55610	VPS50	VPS50 subunit of EARP/GARPII complex
0.148533	chr7	100209214	100210591	70.0378	Promoter-TSS (NM_001040099)	-103	64598	MOSPD3	motile sperm domain containing 3
0.148693	chr7	100157072	100158088	11.8757	Intron (NM_006076, Intron 6 of 11)	13943	100316904	SAP25	Sin3A associated protein 25
0.148721	chr7	107514742	107515741	8.90923	Intergenic	-16311	1738	DLD	dihydrolipoamide dehydrogenase
0.149012	chr7	111494976	111496018	12.1288	Intron (NM_001363540, Intron 23 of 52)	46936	100506413	DOCK4-AS1	DOCK4 antisense RNA 1
0.149019	chr7	127348490	127349489	6.70121	Intron (NM_014390, Intron 9 of 23)	56741	27044	SND1	staphylococcal nuclease and tudor domain containing 1
0.149298	chr7	102388721	102389825	117.241	Promoter-TSS (NM_001145268)	-126	222234	FAM185A	family with sequence similarity 185 member A
0.15013	chr7	128001459	128002484	21.8057	Promoter-TSS (NM_001114726)	-227	401399	PRRT4	proline rich transmembrane protein 4
0.150559	chr7	98030022	98031021	33.798	Promoter-TSS (NM_018842)	-119	55971	BAIAP2L1	BAI1 associated protein 2 like 1
0.150891	chr7	126747469	126748468	11.2687	Intron (NR_163850, Intron 1 of 9)	-49730	693177	MIR592	microRNA 592
0.151794	chr7	92461945	92462970	34.7012	Exon (NM_001259, Exon 2 of 8)	816	1021	CDK6	cyclin dependent kinase 6
0.152033	chr7	27175671	27176720	10.2499	Intergenic	-3788	100133311	HOXA-AS3	HOXA cluster antisense RNA 3
0.152204	chr7	149052116	149053209	16.4347	Intergenic	70290	155060	LOC155060	AI894139 pseudogene
0.152844	chr7	89927153	89928156	5.43053	Intron (NM_001039706, Intron 16 of 22)	-36883	101927446	LOC101927446	uncharacterized LOC101927446
0.153771	chr7	111799723	111800774	8.72812	Intron (NM_001363540, Intron 1 of 52)	46206	9732	DOCK4	dedicator of cytokinesis 4
0.153774	chr7	105229587	105230594	18.0313	Intergenic	-8101	100130771	EFCAB10	EF-hand calcium binding domain 10
0.154112	chr7	107383627	107385025	100.113	Promoter-TSS (NM_024814)	177	101927974	LOC101927974	uncharacterized LOC101927974
0.154861	chr7	92076185	92077316	34.0428	Promoter-TSS (NM_021167)	-46	57798	GATAD1	GATA zinc finger domain containing 1
0.155076	chr7	112579360	112580533	109.429	Promoter-TSS (NM_152556)	-16	154743	BMT2	base methyltransferase of 25S rRNA 2 homolog
0.155528	chr7	111202068	111203097	27.7608	Promoter-TSS (NM_032549)	-9	83943	IMMP2L	inner mitochondrial membrane peptidase subunit 2
0.15561	chr7	102987603	102988616	24.6553	Promoter-TSS (NM_002803)	19	5701	PSMC2	proteasome 26S subunit, ATPase 2
0.15593	chr7	112089066	112091376	88.8228	Promoter-TSS (NM_001550)	-262	3475	IFRD1	interferon related developmental regulator 1
0.157998	chr7	113725362	113726394	58.7117	Promoter-TSS (NR_033766)	-504	93986	FOXP2	forkhead box P2
0.158082	chr7	111845978	111847114	130.378	Promoter-TSS (NM_014705)	-92	9732	DOCK4	dedicator of cytokinesis 4
0.158737	chr7	90041855	90042854	5.87194	Exon (NM_001185073, Exon 3 of 3)	9579	9069	CLDN12	claudin 12
0.158769	chr7	109119158	109120165	7.15919	Intergenic	480609	442720	EIF3IP1	eukaryotic translation initiation factor 3 subunit I pseudogene 1
0.160937	chr7	100472243	100473244	41.5968	Promoter-TSS (NM_015908)	18	51593	SRRT	serrate, RNA effector molecule
0.163315	chr7	97977642	97978697	7.99816	Intron (NM_018842, Intron 3 of 13)	52233	55971	BAIAP2L1	BAI1 associated protein 2 like 1
0.163678	chr7	127661194	127662206	11.9902	Intron (NM_014390, Intron 16 of 23)	9790	64101	LRRC4	leucine rich repeat containing 4
0.164675	chr7	96177654	96178723	17.1169	Intron (NR_163953, Intron 2 of 5)	-45353	7979	SEM1	SEM1 26S proteasome complex subunit
0.166999	chr7	100136229	100137254	115.059	Promoter-TSS (NM_006076)	-85	3268	AGFG2	ArfGAP with FG repeats 2
0.167615	chr7	94452946	94453945	5.30729	Intergenic	-83461	55607	PPP1R9A	protein phosphatase 1 regulatory subunit 9A
0.167679	chr7	102044705	102045731	15.2244	TTS (NR_031669)	1084	100313829	MIR548O	microRNA 548o
0.168154	chr7	111200515	111201566	16.0762	Intron (NM_001350959, Intron 2 of 7)	1307	83943	IMMP2L	inner mitochondrial membrane peptidase subunit 2
0.168159	chr7	98476241	98477960	15.2122	Intron (NM_003496, Intron 1 of 70)	987	8295	TRRAP	transformation/transcription domain associated protein
0.168704	chr7	102030823	102031835	14.0807	Intron (NR_038967, Intron 4 of 8)	-5481	79706	PRKRIP1	PRKR interacting protein 1
0.169746	chr7	92157492	92158511	89.2645	Promoter-TSS (NM_001282677)	-108	84060	RBM48	RNA binding motif protein 48
0.17006	chr7	101006876	101007911	17.6752	Intron (NM_001278563, Intron 1 of 13)	1237	136227	COL26A1	collagen type XXVI alpha 1 chain
0.171011	chr7	100786911	100788024	13.2052	Intergenic	-10290	1174	AP1S1	adaptor related protein complex 1 subunit sigma 1
0.17216	chr7	97923788	97924787	24.8829	Intron (NM_018842, Intron 12 of 13)	13289	25798	BRI3	brain protein I3
0.173716	chr7	99646887	99648003	24.9306	Promoter-TSS (NM_001362779)	28	7589	ZSCAN21	zinc finger and SCAN domain containing 21
0.175561	chr7	100720567	100721573	13.8583	Intergenic	-7692	81844	TRIM56	tripartite motif containing 56
0.175596	chr7	105516456	105518451	23.4341	Promoter-TSS (NM_020725)	-422	222255	ATXN7L1	ataxin 7 like 1
0.176061	chr7	120590189	120591195	63.7115	Promoter-TSS (NM_198267)	-139	54556	ING3	inhibitor of growth family member 3
0.177173	chr7	97735664	97736667	25.5791	Promoter-TSS (NM_014916)	-9	22853	LMTK2	lemur tyrosine kinase 2
0.177623	chr7	109191776	109192775	3.86077	Intergenic	407995	442720	EIF3IP1	eukaryotic translation initiation factor 3 subunit I pseudogene 1
0.179193	chr7	151249175	151250217	16.0765	Intergenic	-32715	6009	RHEB	Ras homolog, mTORC1 binding
0.179269	chr7	105161897	105162912	73.2152	Intron (NM_019042, Intron 1 of 15)	314	54517	PUS7	pseudouridine synthase 7
0.180026	chr7	100887570	100888911	89.0338	Intron (NM_016068, Intron 1 of 4)	122	51024	FIS1	fission, mitochondrial 1
0.180739	chr7	123174183	123175186	66.6566	Promoter-TSS (NM_178827)	34	154865	IQUB	IQ motif and ubiquitin domain containing
0.180861	chr7	100816393	100817871	33.0244	Intron (NM_001369694, Intron 3 of 4)	5385	375607	NAT16	N-acetyltransferase 16 (putative)
0.181786	chr7	20998557	20999556	5.59929	Intron (NR_126381, Intron 2 of 4)	124006	104355138	LINC01162	long intergenic non-protein coding RNA 1162
0.182032	chr7	87918506	87919505	10.299	Intron (NM_001205316, Intron 1 of 3)	17204	79689	STEAP4	STEAP4 metalloreductase
0.183539	chr7	90893148	90894292	89.1546	Promoter-TSS (NM_003505)	-28	8321	FZD1	frizzled class receptor 1
0.184185	chr7	41750537	41751544	8.33064	Intron (NR_027118, Intron 2 of 3)	-8352	3624	INHBA	inhibin subunit beta A
0.185096	chr7	30779752	30781114	10.9785	Intergenic	-11318	11185	INMT	indolethylamine N-methyltransferase
0.185888	chr7	105857382	105858382	15.0827	Intergenic	67547	10135	NAMPT	nicotinamide phosphoribosyltransferase
0.186015	chr7	107220200	107221224	24.03	Promoter-TSS (NM_001371353)	21	#N/A
0.186224	chr7	123197414	123198519	17.811	Promoter-TSS (NM_001282422)	-8	4698	NDUFA5	NADH:ubiquinone oxidoreductase subunit A5
0.186284	chr7	131031643	131032701	8.69562	Intron (NM_001321316, Intron 1 of 17)	19537	4289	MKLN1	muskelin 1
0.186678	chr7	93633195	93634209	27.2906	Promoter-TSS (NM_001317739)	-35	10282	BET1	Bet1 golgi vesicular membrane trafficking protein
0.186751	chr7	103847979	103848983	43.9753	Promoter-TSS (NM_002553)	14	5001	ORC5	origin recognition complex subunit 5
0.187646	chr7	107851599	107852598	7.62598	Intron (NM_001371137, Intron 8 of 25)	31731	#N/A
0.188021	chr7	105705040	105706040	36.1851	Intergenic	47218	6856	SYPL1	synaptophysin like 1
0.188315	chr7	105027829	105028828	11.0758	Intron (NM_001350738, Intron 2 of 16)	1040	6733	SRPK2	SRSF protein kinase 2
0.188441	chr7	91874779	91875799	63.6248	Promoter-TSS (NM_019004)	1	54467	ANKIB1	ankyrin repeat and IBR domain containing 1
0.191909	chr7	11251701	11253148	17.6719	Intergenic	238925	9678	PHF14	PHD finger protein 14
0.193306	chr7	94537319	94538320	12.4352	Intron (NM_017650, Intron 1 of 15)	870	55607	PPP1R9A	protein phosphatase 1 regulatory subunit 9A
0.193832	chr7	99612700	99613705	19.0326	Promoter-TSS (NR_144477)	-17	7586	ZKSCAN1	zinc finger with KRAB and SCAN domains 1
0.194343	chr7	100860245	100861887	26.0566	Promoter-TSS (NM_001084)	-204	8985	PLOD3	procollagen-lysine,2-oxoglutarate 5-dioxygenase 3
0.194616	chr7	91509572	91510613	41.6291	Promoter-TSS (NM_001301135)	-76	7978	MTERF1	mitochondrial transcription termination factor 1
0.195083	chr7	99933101	99934159	93.5389	Promoter-TSS (NR_036569)	-58	101752399	STAG3L5P-PVRIG2P-PILRB	STAG3L5P-PVRIG2P-PILRB readthrough
0.195387	chr7	135799667	135800666	6.86024	Intergenic	-138059	767558	LUZP6	leucine zipper protein 6
0.195497	chr7	96338672	96339677	32.663	Promoter-TSS (NM_006304)	-16	7979	SEM1	SEM1 26S proteasome complex subunit
0.195923	chr7	2749001	2750017	9.67901	Intron (NM_001321766, Intron 6 of 6)	21673	155185	AMZ1	archaelysin family metallopeptidase 1
0.196155	chr7	101651920	101652927	14.2206	Intron (NM_001202544, Intron 2 of 21)	191517	1523	CUX1	cut like homeobox 1
0.196335	chr7	107103235	107104302	8.42639	Intron (NM_006348, Intron 6 of 21)	-6734	2845	GPR22	G protein-coupled receptor 22
0.196635	chr7	127983487	127984489	19.2393	Promoter-TSS (NM_018077)	-26	55131	RBM28	RNA binding motif protein 28
0.197374	chr7	91763361	91764632	82.9633	Promoter-TSS (NM_000786)	63	1595	CYP51A1	cytochrome P450 family 51 subfamily A member 1
0.197407	chr7	82614134	82615159	12.5857	Intron (NM_014510, Intron 3 of 19)	177554	27445	PCLO	piccolo presynaptic cytomatrix protein
0.197647	chr7	107203900	107204905	46.3046	Promoter-TSS (NM_001371364)	0	11062	DUS4L	dihydrouridine synthase 4 like
0.197835	chr7	99102043	99103047	70.5361	Promoter-TSS (NM_014569)	-68	23660	ZKSCAN5	zinc finger with KRAB and SCAN domains 5
0.199134	chr7	100076394	100077420	30.1114	Promoter-TSS (NM_001303043)	-5	81628	TSC22D4	TSC22 domain family member 4
0.199498	chr7	102256873	102257872	23.1394	Promoter-TSS (NM_006989)	-167	10156	RASA4	RAS p21 protein activator 4
0.200209	chr7	33498554	33499781	19.1742	Intron (NM_001348037, Intron 18 of 20)	329991	27241	BBS9	Bardet-Biedl syndrome 9
0.200886	chr7	97983456	97984533	45.4401	Intron (NM_018842, Intron 3 of 13)	46408	55971	BAIAP2L1	BAI1 associated protein 2 like 1
0.201083	chr7	102036177	102037176	43.0418	Promoter-TSS (NM_024653)	-134	79706	PRKRIP1	PRKR interacting protein 1
0.201443	chr7	101777395	101778415	18.3594	Intron (NM_001202544, Intron 7 of 21)	-150527	10603	SH2B2	SH2B adaptor protein 2
0.202283	chr7	73043292	73044291	15.7642	Intergenic	-4939	51085	MLXIPL	MLX interacting protein like
0.202487	chr7	149186157	149187175	8.35115	Intron (NM_152557, Intron 4 of 6)	8232	155061	ZNF746	zinc finger protein 746
0.203828	chr7	101915120	101916145	17.1867	Intron (NM_001202544, Intron 13 of 21)	-12800	10603	SH2B2	SH2B adaptor protein 2
0.203894	chr7	94139110	94140109	16.4584	Intron (NM_001363428, Intron 1 of 17)	488	64921	CASD1	CAS1 domain containing 1
0.204206	chr7	98739660	98741207	44.7054	Intron (NM_181349, Intron 1 of 17)	1298	57154	SMURF1	SMAD specific E3 ubiquitin protein ligase 1
0.204747	chr7	130691765	130692896	14.3437	Intron (NR_109850, Intron 3 of 5)	94107	100506860	LINC00513	long intergenic non-protein coding RNA 513
0.205752	chr7	135020074	135021081	19.7865	Intergenic	103846	346673	STRA8	stimulated by retinoic acid 8
0.206154	chr7	32944448	32945987	19.3721	Intergenic	-13845	25948	KBTBD2	kelch repeat and BTB domain containing 2
0.206796	chr7	120194709	120195708	4.42945	Intron (NM_012281, Intron 1 of 5)	281979	3751	KCND2	potassium voltage-gated channel subfamily D member 2
0.207042	chr7	36201318	36202330	14.2512	Intron (NM_030636, Intron 2 of 7)	8961	80820	EEPD1	endonuclease/Exonuclease/phosphatase family domain containing 1
0.208566	chr7	111402886	111404260	8.33025	Intron (NM_001363540, Intron 39 of 52)	-44988	100506413	DOCK4-AS1	DOCK4 antisense RNA 1
0.208816	chr7	156622072	156623071	5.65071	Intron (NR_146958, Intron 3 of 14)	63306	64327	LMBR1	limb development membrane protein 1
0.210062	chr7	106208646	106209645	10.8797	Intergenic	92459	168455	CCDC71L	coiled-coil domain containing 71 like
0.210152	chr7	128116288	128117348	46.1043	Promoter-TSS (NM_018396)	35	55798	METTL2B	methyltransferase like 2B
0.21059	chr7	156736022	156737094	11.217	Intergenic	-5848	64434	NOM1	nucleolar protein with MIF4G domain 1
0.210721	chr7	102118907	102119906	15.7433	Promoter-TSS (NM_006234)	-37	5439	POLR2J	RNA polymerase II subunit J
0.211122	chr7	30212296	30213314	23.0757	Intergenic	38203	222166	MTURN	maturin, neural progenitor differentiation regulator homolog
0.211333	chr7	47514444	47516105	35.624	Intron (NM_022748, Intron 4 of 30)	-10873	109623468	SNORD151	small nucleolar RNA, C/D box 151
0.21159	chr7	102157894	102158896	23.841	Promoter-TSS (NM_001367767)	-171	100271927	RASA4B	RAS p21 protein activator 4B
0.213035	chr7	108100101	108101100	7.17131	Intergenic	-3436	#N/A
0.214278	chr7	91569649	91570660	50.4124	Promoter-TSS (NM_005751)	-22	10142	AKAP9	A-kinase anchoring protein 9
0.215278	chr7	86945850	86946850	29.9098	Intergenic	28458	11257	TP53TG1	TP53 target 1
0.215288	chr7	99006026	99007031	38.498	Promoter-TSS (NM_001370407)	-64	8896	BUD31	BUD31 homolog
0.215455	chr7	148928698	148929767	26.036	Intergenic	-7510	7988	ZNF212	zinc finger protein 212
0.215883	chr7	101386256	101387449	10.5356	Intergenic	-72435	1523	CUX1	cut like homeobox 1
0.21624	chr7	6641550	6642602	13.5511	Intron (NM_024067, Intron 5 of 5)	12424	79034	C7orf26	chromosome 7 open reading frame 26
0.216785	chr7	8129844	8130930	7.46389	Intergenic	121960	113263	GLCCI1	glucocorticoid induced 1
0.216867	chr7	105818872	105819871	8.14961	Intergenic	-66349	6856	SYPL1	synaptophysin like 1
0.216963	chr7	89873936	89874940	14.5841	Promoter-TSS (NM_001160138)	-50	79846	CFAP69	cilia and flagella associated protein 69
0.217112	chr7	99697977	99699645	71.1614	Promoter-TSS (NM_182776)	-408	4176	MCM7	minichromosome maintenance complex component 7
0.218652	chr7	102937341	102938340	28.6515	Promoter-TSS (NM_004279)	-42	9512	PMPCB	peptidase, mitochondrial processing beta subunit
0.220743	chr7	27960351	27961350	6.64027	Intron (NM_175061, Intron 2 of 4)	181136	8887	TAX1BP1	Tax1 binding protein 1
0.222036	chr7	97601151	97602150	38.0118	Promoter-TSS (NR_002822)	20	107986827	CZ1P-ASNS	CZ1P-ASNS readthrough
0.222124	chr7	149431386	149432385	16.8914	TTS (NM_001290187)	19783	84626	KRBA1	KRAB-A domain containing 1
0.222565	chr7	112429615	112431003	43.0734	Non-coding (NR_109840, Exon 1 of 4)	139	64418	TMEM168	transmembrane protein 168
0.223987	chr7	132823727	132824744	6.61266	Intergenic	-30964	105375512	LOC105375512	uncharacterized LOC105375512
0.224046	chr7	80788392	80789423	10.2802	Intergenic	-237202	10512	SEMA3C	semaphorin 3C
0.224137	chr7	100033642	100034694	46.9306	Promoter-TSS (NM_001346938)	-48	221908	PPP1R35	protein phosphatase 1 regulatory subunit 35
0.226761	chr7	83272722	83273727	17.2048	Intron (NM_012431, Intron 1 of 16)	-2477	9723	SEMA3E	semaphorin 3E
0.226916	chr7	100728136	100729428	24.7001	Promoter-TSS (NM_030961)	20	81844	TRIM56	tripartite motif containing 56
0.22699	chr7	30687311	30688312	8.87017	Intergenic	34261	1395	CRHR2	corticotropin releasing hormone receptor 2
0.229148	chr7	102003741	102004783	49.2353	Promoter-TSS (NR_038967)	-46	100630923	LOC100630923	LOC100289561-PRKRIP1 readthrough
0.230594	chr7	117823614	117824623	27.9156	Promoter-TSS (NM_016200)	-100	51691	LSM8	LSM8 homolog, U6 small nuclear RNA associated
0.230605	chr7	99069940	99070941	52.8572	Promoter-TSS (NR_147001)	-73	285989	ZNF789	zinc finger protein 789
0.230773	chr7	158575156	158576181	14.1082	Intron (NM_001367773, Intron 6 of 22)	46532	57488	ESYT2	extended synaptotagmin 2
0.231478	chr7	128049561	128050564	48.5977	Promoter-TSS (NM_001102605)	-26	3614	IMPDH1	inosine monophosphate dehydrogenase 1
0.231538	chr7	96733603	96734602	6.65495	Intergenic	-11803	57001	SDHAF3	succinate dehydrogenase complex assembly factor 3
0.232716	chr7	105752377	105753380	45.0604	Promoter-TSS (NM_182715)	-120	6856	SYPL1	synaptophysin like 1
0.233426	chr7	101879608	101880617	10.4114	Intron (NM_001202543, Intron 22 of 23)	-48320	10603	SH2B2	SH2B adaptor protein 2
0.233634	chr7	100288991	100289990	11.1231	Intergenic	-2419	64599	GIGYF1	GRB10 interacting GYF protein 1
0.235353	chr7	99325975	99327695	8.09502	Intron (NM_001256497, Intron 2 of 14)	5984	1551	CYP3A7	cytochrome P450 family 3 subfamily A member 7
0.236607	chr7	116449412	116450411	6.17995	Intergenic	-52730	830	CAPZA2	capping actin protein of muscle Z-line subunit alpha 2
0.237333	chr7	102984716	102985718	30.259	Promoter-TSS (NM_014377)	-3	27000	DNAJC2	DnaJ heat shock protein family (Hsp40) member C2
0.237805	chr7	113061461	113062463	10.8519	Intergenic	-303325	401397	SMIM30	small integral membrane protein 30
0.238639	chr7	6543251	6544719	80.6733	Intron (NM_001145118, Intron 15 of 21)	-20202	11014	KDELR2	KDEL endoplasmic reticulum protein retention receptor 2
0.238691	chr7	31673183	31674228	4.99837	Intron (NM_001257968, Intron 9 of 14)	-52926	10842	PPP1R17	protein phosphatase 1 regulatory subunit 17
0.240686	chr7	149468440	149469442	32.3425	Intron (NM_207336, Intron 1 of 4)	1736	168544	ZNF467	zinc finger protein 467
0.240827	chr7	101499750	101500932	64.5743	Intron (NM_181552, Intron 1 of 23)	39435	1523	CUX1	cut like homeobox 1
0.240973	chr7	105221487	105222524	27.7727	Promoter-TSS (NM_001355526)	-16	100130771	EFCAB10	EF-hand calcium binding domain 10
0.241372	chr7	99755863	99756912	28.3965	Promoter-TSS (NM_018275)	-41	55262	MAP11	microtubule associated protein 11
0.241426	chr7	105410446	105411445	9.07404	Intron (NM_152749, Intron 3 of 3)	-91336	222255	ATXN7L1	ataxin 7 like 1
0.242735	chr7	42332138	42333214	9.41541	Intergenic	-55868	2737	GLI3	GLI family zinc finger 3
0.242746	chr7	31775657	31776700	6.84798	Intergenic	49349	10842	PPP1R17	protein phosphatase 1 regulatory subunit 17
0.243087	chr7	9577	10584	7.49692	Intergenic	139358	102723672	LOC102723672	uncharacterized LOC102723672
0.243616	chr7	99063321	99064323	32.3599	Promoter-TSS (NM_001198879)	-32	9551	ATP5MF	ATP synthase membrane subunit f
0.244559	chr7	116502093	116503098	17.7462	Promoter-TSS (NM_006136)	-46	830	CAPZA2	capping actin protein of muscle Z-line subunit alpha 2
0.245368	chr7	100066568	100067567	9.85379	Intron (NR_130119, Intron 3 of 4)	-5184	402573	C7orf61	chromosome 7 open reading frame 61
0.246007	chr7	984883	985912	10.926	Promoter-TSS (NM_001284309)	55	11033	ADAP1	ArfGAP with dual PH domains 1
0.246827	chr7	51417488	51418574	14.1032	Intergenic	-33473	23242	COBL	cordon-bleu WH2 repeat protein
0.248241	chr7	115849980	115850987	14.3826	Promoter-TSS (NM_015641)	-110	26136	TES	testin LIM domain protein
0.248359	chr7	39559214	39560225	10.4013	Intergenic	-46284	57002	YAE1	YAE1 maturation factor of ABCE1
2.83489	chr7	107301680	107302719	17.6836	Promoter-TSS (NR_028137)	44	286002	SLC26A4-AS1	SLC26A4 antisense RNA 1
0.0054466	chr6	27463239	27464271	16.77	Intergenic	-22858	7738	ZNF184	zinc finger protein 184
0.00603601	chr6	35731904	35732974	41.9461	Intergenic	-11932	389383	CLPSL2	colipase like 2
0.00735167	chr6	37391173	37392574	18.268	Intergenic	-9124	23070	CMTR1	cap methyltransferase 1
0.0074975	chr6	27639391	27640567	37.079	Intergenic	-21835	100507173	LINC01012	long intergenic non-protein coding RNA 1012
0.00758076	chr6	110213905	110214912	6.87438	Intergenic	-85051	2830	GPR6	G protein-coupled receptor 6
0.00807459	chr6	136886724	136887826	27.3215	Intron (NM_005923, Intron 26 of 29)	-15318	9053	MAP7	microtubule associated protein 7
0.00819475	chr6	167040579	167041581	34.6339	Promoter-TSS (NM_021135)	-341	6196	RPS6KA2	ribosomal protein S6 kinase A2
0.00822036	chr6	167307783	167308784	11.4867	Intergenic	-8903	100861523	RPS6KA2-AS1	RPS6KA2 antisense RNA 1
0.00846069	chr6	28600779	28601984	9.25791	Intergenic	-17427	114821	ZBED9	zinc finger BED-type containing 9
0.00871184	chr6	7008436	7009435	21.6422	Intergenic	-99041	6239	RREB1	ras responsive element binding protein 1
0.0102682	chr6	53587832	53588836	18.38	Intergenic	-57780	401265	KLHL31	kelch like family member 31
0.0106568	chr6	154664709	154665721	42.8792	Intron (NM_001130700, Intron 1 of 11)	12685	26034	IPCEF1	interaction protein for cytohesin exchange factors 1
0.0110943	chr6	157519171	157520183	18.7231	Intron (NM_001363725, Intron 14 of 17)	162116	57492	ARID1B	AT-rich interaction domain 1B
0.0114924	chr6	152023746	152024931	10.7886	Intron (NM_001122742, Intron 2 of 9)	12707	2099	ESR1	estrogen receptor 1
0.0123159	chr6	109550465	109551472	7.62083	Intron (NR_152435, Intron 14 of 45)	63934	221262	CCDC162P	coiled-coil domain containing 162, pseudogene
0.0123841	chr6	109316263	109317270	4.65093	Intron (NM_001199933, Intron 5 of 9)	13425	27244	SESN1	sestrin 1
0.0125724	chr6	167202377	167203395	16.7505	Intron (NM_001318936, Intron 2 of 22)	73127	6196	RPS6KA2	ribosomal protein S6 kinase A2
0.0126089	chr6	15089702	15090722	32.6469	Intergenic	-156088	3720	JARID2	jumonji and AT-rich interaction domain containing 2
0.0132997	chr6	27064678	27065684	11.9319	Intergenic	35394	8970	HIST1H2BJ	histone cluster 1 H2B family member j
0.013465	chr6	147402073	147403073	8.15376	Intron (NR_034115, Intron 4 of 10)	-77488	106182249	LUADT1	lung adenocarcinoma associated transcript 1
0.0135404	chr6	19892117	19893127	21.5588	Intergenic	55021	3400	ID4	inhibitor of DNA binding 4, HLH protein
0.0139884	chr6	3378254	3379262	21.153	Intron (NM_015482, Intron 3 of 9)	66489	63027	SLC22A23	solute carrier family 22 member 23
0.01418	chr6	11414478	11415609	12.4657	Intergenic	-32462	4739	NEDD9	neural precursor cell expressed, developmentally down-regulated 9
0.0144626	chr6	3819207	3820214	28.7817	Intergenic	-29897	26240	FAM50B	family with sequence similarity 50 member B
0.015833	chr6	12331863	12332902	23.648	Intergenic	41788	1906	EDN1	endothelin 1
0.0159424	chr6	107221088	107222097	6.56536	Intron (NR_147986, Intron 1 of 3)	-10408	693172	MIR587	microRNA 587
0.0169054	chr6	40555229	40556253	15.0443	Promoter-TSS (NM_020737)	-638	57497	LRFN2	leucine rich repeat and fibronectin type III domain containing 2
0.0172007	chr6	120003826	120004855	11.3746	Intron (NR_134600, Intron 2 of 3)	133367	105377975	LOC105377975	uncharacterized LOC105377975
0.0176251	chr6	4489479	4490493	19.3412	Non-coding (NR_149117, Exon 3 of 5)	954	105374895	LINC02533	long intergenic non-protein coding RNA 2533
0.0177213	chr6	24779322	24780365	14.4404	Intron (NM_001251990, Intron 2 of 6)	4202	51053	GMNN	geminin DNA replication inhibitor
0.0185559	chr6	74104030	74105451	13.5037	Exon (NM_018665, Exon 1 of 17)	189	55510	DDX43	DEAD-box helicase 43
0.0194279	chr6	3664647	3665666	10.0307	Intergenic	87090	221749	PXDC1	PX domain containing 1
0.0194318	chr6	21738374	21739384	41.4237	Intron (NR_015410, Intron 2 of 11)	72235	401237	CASC15	cancer susceptibility 15
0.0197014	chr6	161351346	161352345	8.07298	Intergenic	-60914	4216	MAP3K4	mitogen-activated protein kinase kinase kinase 4
0.0197269	chr6	37726713	37727761	11.7903	Intergenic	-60266	60685	ZFAND3	zinc finger AN1-type containing 3
0.0202957	chr6	113815008	113816011	16.6576	Intergenic	-60860	105377957	LINC02518	long intergenic non-protein coding RNA 2518
0.0204213	chr6	109571447	109572447	10.41	Intron (NR_152435, Intron 16 of 45)	84913	221262	CCDC162P	coiled-coil domain containing 162, pseudogene
0.0212539	chr6	122349697	122350696	5.88773	Intergenic	-370500	3298	HSF2	heat shock transcription factor 2
0.0215232	chr6	144651382	144652427	8.93236	Intron (NM_007124, Intron 1 of 73)	39031	7402	UTRN	utrophin
0.021777	chr6	26757916	26758915	18.677	Intergenic	-98435	79692	ZNF322	zinc finger protein 322
0.0222901	chr6	51468323	51469322	4.7821	Intergenic	-17846	101927082	LOC101927082	uncharacterized LOC101927082
0.0225527	chr6	138548324	138549323	12.6588	Intron (NM_020340, Intron 4 of 33)	-9196	59351	PBOV1	prostate and breast cancer overexpressed 1
0.0226553	chr6	164055225	164056255	16.7696	Intergenic	36776	102724152	LOC102724152	uncharacterized LOC102724152
0.0228049	chr6	7201070	7202076	10.5883	Intron (NM_001003699, Intron 6 of 12)	93379	6239	RREB1	ras responsive element binding protein 1
0.0228162	chr6	138893210	138894243	8.58902	Promoter-TSS (NM_020464)	-20	57224	NHSL1	NHS like 1
0.0230104	chr6	100643943	100645389	7.35656	Intergenic	-202552	84539	MCHR2	melanin concentrating hormone receptor 2
0.0231	chr6	15455379	15456390	40.8573	Intron (NM_004973, Intron 4 of 17)	206798	3720	JARID2	jumonji and AT-rich interaction domain containing 2
0.0237865	chr6	4835432	4836467	32.8618	Promoter-TSS (NM_001143970)	-383	9425	CDYL	chromodomain Y like
0.0247629	chr6	49354644	49355670	8.38584	Intergenic	75809	4594	MMUT	methylmalonyl-CoA mutase
0.0251785	chr6	95651435	95652803	7.13266	Intergenic	373208	101927288	MANEA-DT	MANEA divergent transcript
0.0255134	chr6	82810999	82812006	7.89992	Promoter-TSS (NR_149135)	-20	102724168	LINC02542	long intergenic non-protein coding RNA 2542
0.0256991	chr6	52976914	52977919	20.0657	Intergenic	36223	8521	GCM1	glial cells missing transcription factor 1
0.0267342	chr6	38722615	38723668	10.6085	Intron (NM_001206927, Intron 9 of 92)	40054	1769	DNAH8	dynein axonemal heavy chain 8
0.0267521	chr6	135494572	135495571	4.00188	Intergenic	-7375	4602	MYB	MYB proto-oncogene, transcription factor
0.0268296	chr6	39890851	39891850	6.18547	Intron (NR_033233, Intron 2 of 8)	4105	4337	MOCS1	molybdenum cofactor synthesis 1
0.0271095	chr6	54738071	54739070	7.86858	Intron (NM_001010872, Intron 2 of 4)	27001	222584	FAM83B	family with sequence similarity 83 member B
0.0278674	chr6	53608803	53609858	6.88329	Intergenic	-50473	55227	LRRC1	leucine rich repeat containing 1
0.0278782	chr6	157508257	157509256	6.98113	Intron (NM_001363725, Intron 11 of 17)	151195	57492	ARID1B	AT-rich interaction domain 1B
0.0288009	chr6	149176966	149178005	12.701	Intron (NM_005715, Intron 1 of 7)	108335	100128176	UST-AS1	UST antisense RNA 1
0.028897	chr6	9511073	9512103	12.8328	Intergenic	859146	728655	HULC	hepatocellular carcinoma up-regulated long Non-coding RNA
0.0292288	chr6	168151352	168152413	20.2721	Intergenic	-44327	441179	LOC441179	uncharacterized LOC441179
0.0293443	chr6	50809755	50812291	10.9286	Exon (NM_003221, Exon 7 of 7)	24439	7021	TFAP2B	transcription factor AP-2 beta
0.0315979	chr6	136871214	136872214	29.09	5' UTR (NM_001198617, Exon 1 of 16)	243	9053	MAP7	microtubule associated protein 7
0.0317191	chr6	117565891	117566890	6.44393	Intergenic	-20331	245806	VGLL2	vestigial like family member 2
0.0325278	chr6	125032955	125034344	6.01947	Intron (NM_001040214, Intron 4 of 6)	-250042	154214	RNF217	ring finger protein 217
0.0326332	chr6	27660887	27661894	18.2492	Promoter-TSS (NR_038293)	-424	100507173	LINC01012	long intergenic non-protein coding RNA 1012
0.0327539	chr6	107465625	107466624	4.9838	Intergenic	-29405	57673	BEND3	BEN domain containing 3
0.0329236	chr6	40363937	40364936	10.4252	Intron (NM_020737, Intron 2 of 2)	18360	732253	TDRG1	testis development related 1
0.0330192	chr6	42927896	42928944	26.7023	Promoter-TSS (NM_018960)	-72	27232	GNMT	glycine N-methyltransferase
0.033301	chr6	27280157	27281156	6.52354	Promoter-TSS (NM_033482)	-645	94026	POM121L2	POM121 transmembrane nucleoporin like 2
0.0335471	chr6	67696521	67697538	7.25792	Intergenic	-1068214	102723883	LOC102723883	uncharacterized LOC102723883
0.0341932	chr6	125566453	125567454	10.8012	Intron (NM_001003397, Intron 3 of 4)	42096	7164	TPD52L1	TPD52 like 1
0.0342352	chr6	41620599	41621631	21.8321	Exon (NM_001300805, Exon 4 of 4)	14909	4188	MDFI	MyoD family inhibitor
0.0343997	chr6	116280762	116282252	7.96676	Intron (NM_002031, Intron 4 of 7)	-78387	728402	TPI1P3	triosephosphate isomerase 1 pseudogene 3
0.0345255	chr6	13796675	13798416	14.0699	Intron (NM_001031713, Intron 6 of 8)	17247	63933	MCUR1	mitochondrial calcium uniporter regulator 1
0.0347125	chr6	26734932	26735940	15.1833	Intergenic	-75456	79692	ZNF322	zinc finger protein 322
0.0349025	chr6	36422973	36423981	8.33545	Intron (NR_104481, Intron 1 of 3)	12700	222658	KCTD20	potassium channel tetramerization domain containing 20
0.0355303	chr6	13677820	13679406	9.15377	Intron (NM_005493, Intron 2 of 13)	33454	10048	RANBP9	RAN binding protein 9
0.0358343	chr6	128919452	128920452	13.2127	Intergenic	-78208	5796	PTPRK	protein tyrosine phosphatase receptor type K
0.0367326	chr6	88130942	88131959	5.45071	Intron (NM_001031743, Intron 7 of 12)	13760	154313	CFAP206	cilia and flagella associated protein 206
0.0373714	chr6	10163108	10164190	15.1228	Intergenic	-241086	109729173	TFAP2A-AS2	TFAP2A antisense RNA 2
0.0373955	chr6	9810949	9812040	14.1773	Intergenic	-593241	109729173	TFAP2A-AS2	TFAP2A antisense RNA 2
0.0374826	chr6	84043278	84044637	5.70621	Intron (NM_002395, Intron 5 of 13)	96813	4199	ME1	malic enzyme 1
0.0376282	chr6	130628777	130629776	5.15433	Intron (NM_001258275, Intron 2 of 13)	57737	154075	SAMD3	sterile alpha motif domain containing 3
0.0384073	chr6	96205887	96207227	7.83892	Intergenic	181146	79694	MANEA	mannosidase endo-alpha
0.0389693	chr6	27262713	27263805	7.86685	Intergenic	16752	94026	POM121L2	POM121 transmembrane nucleoporin like 2
0.0392151	chr6	20182856	20184023	22.917	Intron (NM_001080480, Intron 1 of 12)	29261	154141	MBOAT1	membrane bound O-acyltransferase domain containing 1
0.0393072	chr6	33955005	33956025	23.3126	Intergenic	12313	100302123	MIR1275	microRNA 1275
0.0394148	chr6	27509077	27510076	5.92538	Intergenic	-68679	7738	ZNF184	zinc finger protein 184
0.0395275	chr6	26766152	26767159	14.0817	Intergenic	-106675	79692	ZNF322	zinc finger protein 322
0.039705	chr6	106054407	106055440	13.6953	Intergenic	-203966	5550	PREP	prolyl endopeptidase
0.0399918	chr6	26751768	26752795	21.7683	Intergenic	-92301	79692	ZNF322	zinc finger protein 322
0.0402581	chr6	100941080	100942093	9.8096	Intergenic	-30035	6492	SIM1	SIM bHLH transcription factor 1
0.0404573	chr6	127914376	127915435	6.82333	Intergenic	16586	352999	C6orf58	chromosome 6 open reading frame 58
0.0405712	chr6	49764193	49765212	10.1112	Intergenic	-9704	5232	PGK2	phosphoglycerate kinase 2
0.0409517	chr6	166765070	166766069	5.02493	TTS (NR_040022)	9450	100289495	LOC100289495	uncharacterized LOC100289495
0.0411158	chr6	109060406	109061471	8.84033	Intergenic	-11919	387111	LINC00222	long intergenic non-protein coding RNA 222
0.042371	chr6	96644077	96645132	9.27301	Intron (NM_006581, Intron 2 of 2)	180754	10690	FUT9	fucosyltransferase 9
0.0428814	chr6	136091629	136093042	7.89559	Intergenic	-80504	27115	PDE7B	phosphodiesterase 7B
0.0430727	chr6	6599275	6600280	8.58732	Intron (NM_004271, Intron 1 of 4)	10824	9450	LY86	lymphocyte antigen 86
0.0431326	chr6	170589059	170590077	16.9966	Intergenic	-3718	285804	LOC285804	uncharacterized LOC285804
0.0437596	chr6	4333994	4335000	10.8578	Intergenic	-144234	102724096	LOC102724096	uncharacterized LOC102724096
0.0438057	chr6	6008458	6009457	6.68992	Intergenic	-1119	51299	NRN1	neuritin 1
0.0448457	chr6	168215954	168216976	10.4747	Intergenic	-10779	4301	AFDN	afadin, adherens junction formation factor
0.0456056	chr6	41803283	41804282	5.71781	Intron (NM_001286554, Intron 1 of 5)	35593	25862	USP49	ubiquitin specific peptidase 49
0.0457297	chr6	134699905	134700904	5.46161	Intergenic	-58450	154092	LINC01010	long intergenic non-protein coding RNA 1010
0.0458477	chr6	43672301	43673300	10.9227	Intergenic	-17251	55168	MRPS18A	mitochondrial ribosomal protein S18A
0.0475392	chr6	22363094	22364093	8.47476	Intergenic	-60529	5617	PRL	prolactin
0.0478946	chr6	7418122	7419121	15.6905	TTS (NM_031480)	28559	83732	RIOK1	RIO kinase 1
0.0481156	chr6	142300832	142302065	7.15652	Intergenic	108488	4829	NMBR	neuromedin B receptor
0.0483643	chr6	159202115	159203114	10.9183	Intron (NM_003379, Intron 6 of 12)	-16829	100500851	MIR3918	microRNA 3918
0.0491229	chr6	44221528	44222531	52.9431	Promoter-TSS (NR_039790)	-7	100616124	MIR4647	microRNA 4647
0.0511147	chr6	40682136	40683215	14.3916	Intergenic	-127572	57497	LRFN2	leucine rich repeat and fibronectin type III domain containing 2
0.0511263	chr6	138552077	138553428	13.58	Intron (NM_020340, Intron 5 of 33)	-13125	59351	PBOV1	prostate and breast cancer overexpressed 1
0.0514887	chr6	11389847	11390868	14.0529	Intergenic	-7776	4739	NEDD9	neural precursor cell expressed, developmentally down-regulated 9
0.0515296	chr6	41504317	41505326	12.3057	Intron (NR_126415, Intron 1 of 1)	9160	101060264	FOXP4-AS1	FOXP4 antisense RNA 1
0.0515332	chr6	21386733	21387748	7.27255	Intergenic	124883	100874531	LINC00581	long intergenic non-protein coding RNA 581
0.051539	chr6	158759990	158760989	6.37828	Intron (NM_001007466, Intron 1 of 12)	16475	109623462	SNORA116	small nucleolar RNA, H/ACA box 116
0.0533971	chr6	120048648	120049753	16.5	Intron (NR_134600, Intron 2 of 3)	178227	105377975	LOC105377975	uncharacterized LOC105377975
0.0542812	chr6	48714348	48715828	6.61401	Intergenic	-678663	442213	PTCHD4	patched domain containing 4
0.0563581	chr6	19477440	19478472	14.6734	Intergenic	27904	105374960	LOC105374960	uncharacterized LOC105374960
0.0569393	chr6	38762941	38763983	8.88535	Intron (NM_001206927, Intron 21 of 92)	80375	1769	DNAH8	dynein axonemal heavy chain 8
0.0571963	chr6	1278064	1279063	6.43466	Intergenic	-33770	94234	FOXQ1	forkhead box Q1
0.0577338	chr6	125905292	125906362	17.4664	Intergenic	-89672	643623	LINC02523	long intergenic non-protein coding RNA 2523
0.0577476	chr6	10140748	10141771	9.67257	Intergenic	-263476	109729173	TFAP2A-AS2	TFAP2A antisense RNA 2
0.0581739	chr6	77585791	77587321	10.7488	Intergenic	-283216	105377860	LINC02540	long intergenic non-protein coding RNA 2540
0.0587494	chr6	53734445	53735507	8.42809	Intron (NM_018214, Intron 2 of 13)	-59804	101927189	LOC101927189	uncharacterized LOC101927189
0.0591989	chr6	130122704	130123704	4.47466	Intergenic	59256	253582	TMEM244	transmembrane protein 244
0.0594879	chr6	45444790	45445789	4.63882	Intron (NM_001024630, Intron 5 of 8)	55277	860	RUNX2	RUNX family transcription factor 2
0.0599689	chr6	149293307	149294306	6.86809	Intron (NM_005715, Intron 5 of 7)	-7986	100128176	UST-AS1	UST antisense RNA 1
0.0602092	chr6	40616385	40617384	6.3735	Intergenic	-61781	57497	LRFN2	leucine rich repeat and fibronectin type III domain containing 2
0.0605704	chr6	113963772	113964925	5.85947	Intron (NR_125844, Intron 1 of 2)	6929	101927686	LINC02541	long intergenic non-protein coding RNA 2541
0.0615144	chr6	131029121	131030216	6.84293	Intergenic	-118877	100507203	SMLR1	small leucine rich protein 1
0.061672	chr6	15949196	15950260	15.0448	Intergenic	-179589	29116	MYLIP	myosin regulatory light chain interacting protein
0.0618017	chr6	10099183	10100182	9.12528	Intergenic	-305053	109729173	TFAP2A-AS2	TFAP2A antisense RNA 2
0.0622096	chr6	47632591	47633597	8.56329	Intron (NM_153839, Intron 2 of 10)	8886	222611	ADGRF2	adhesion G protein-coupled receptor F2
0.0628978	chr6	12816063	12817074	19.1923	Intron (NM_030948, Intron 4 of 14)	97637	221692	PHACTR1	phosphatase and actin regulator 1
0.0630075	chr6	111597672	111598671	6.14617	Intergenic	17629	91749	MFSD4B	major facilitator superfamily domain containing 4B
0.063651	chr6	7973544	7974592	9.68116	Intron (NR_037616, Intron 4 of 12)	-12267	206426	PIP5K1P1	phosphatidylinositol-4-phosphate 5-kinase type 1 pseudogene 1
0.0638547	chr6	27569376	27570632	25.6566	Intergenic	-91810	100507173	LINC01012	long intergenic non-protein coding RNA 1012
0.0639354	chr6	17389381	17390380	12.6465	Intergenic	-3856	10486	CAP2	cyclase associated actin cytoskeleton regulatory protein 2
0.065214	chr6	25499685	25500813	9.4729	Intron (NM_017640, Intron 16 of 36)	-152194	10590	SCGN	secretagogin, EF-hand calcium binding protein
0.0671697	chr6	1311272	1312271	10.343	Promoter-TSS (NM_033260)	-562	94234	FOXQ1	forkhead box Q1
0.0677461	chr6	158406874	158407873	11.475	Intron (NM_003898, Intron 1 of 26)	4478	8871	SYNJ2	synaptojanin 2
0.067778	chr6	52268108	52269172	12.7184	Exon (NM_133367, Exon 2 of 2)	-16500	114327	EFHC1	EF-hand domain containing 1
0.0677809	chr6	52782738	52783772	22.1866	Intergenic	-8759	2940	GSTA3	glutathione S-transferase alpha 3
0.0678251	chr6	1295922	1297439	7.9709	Intergenic	-15653	94234	FOXQ1	forkhead box Q1
0.0681278	chr6	11229628	11230627	16.6856	Intron (NM_001142393, Intron 2 of 7)	2774	4739	NEDD9	neural precursor cell expressed, developmentally down-regulated 9
0.0685454	chr6	15026708	15027782	7.09232	Intergenic	-219055	3720	JARID2	jumonji and AT-rich interaction domain containing 2
0.0687792	chr6	6927691	6928813	8.87025	Intergenic	-179724	6239	RREB1	ras responsive element binding protein 1
0.0694996	chr6	47423003	47424002	7.05414	Intergenic	-22023	23607	CD2AP	CD2 associated protein
0.0705194	chr6	10316278	10317296	14.6764	Intergenic	-87948	109729173	TFAP2A-AS2	TFAP2A antisense RNA 2
0.0711159	chr6	18425133	18426132	5.70294	Intron (NM_182757, Intron 2 of 7)	38051	255488	RNF144B	ring finger protein 144B
0.0729365	chr6	111643046	111644045	5.08231	Intron (NM_002912, Intron 27 of 32)	63003	91749	MFSD4B	major facilitator superfamily domain containing 4B
0.0730142	chr6	34147366	34148402	8.90326	Intergenic	-24485	2914	GRM4	glutamate metabotropic receptor 4
0.0739572	chr6	78359423	78360771	5.4785	5' UTR (NM_001282136, Exon 1 of 5)	106	101928601	MEI4	meiotic double-stranded break formation protein 4
0.0744173	chr6	13648831	13649830	4.88086	Intron (NM_005493, Intron 5 of 13)	33763	51406	NOL7	nucleolar protein 7
0.0747633	chr6	158422989	158423988	11.1281	TTS (NR_046796)	1349	100874300	SYNJ2-IT1	SYNJ2 Intronic transcript 1
0.0759593	chr6	3457647	3458676	14.3126	Intron (NR_147844, Intron 1 of 1)	-1368	63027	SLC22A23	solute carrier family 22 member 23
0.0766731	chr6	78409840	78410860	12.1809	Intron (NM_001282136, Intron 2 of 4)	47594	101928601	MEI4	meiotic double-stranded break formation protein 4
0.0766856	chr6	139871236	139872235	3.10959	Intergenic	-76002	645434	LINC01625	long intergenic non-protein coding RNA 1625
0.0767637	chr6	33699439	33700438	10.6193	Intron (NM_054111, Intron 2 of 5)	14744	117283	IP6K3	inositol hexakisphosphate kinase 3
0.0772509	chr6	17167268	17168614	5.78284	Intergenic	65452	401236	STMND1	stathmin domain containing 1
0.0781338	chr6	45695260	45696313	8.62183	Intergenic	209548	53405	CLIC5	chloride intracellular channel 5
[truncated: 5,171 more rows]
